# Supplementary material for: Relieving Sore Throat Formula Exerts a Therapeutic Effect on Pharyngitis through Immunoregulation and NF-κB Pathway
Source: Mediators Inflamm. 2020 May 15;2020:2929163. doi: 10.1155/2020/2929163 (PMC7245656; doi:10.1155/2020/2929163)
Supplement: Supplementary 2 — Supplementary Table 1. ADME parameters of active compounds in RSTF. [file 2929163.f2.xlsx]

## Sheet: compounds ADME parameters
Supplementary Table 1:ADME parameters of active compounds in RSTF
Herbs	Molecule ID	Molecule	OB（%）	caco-2	DL	HL
HMM	MOL000211	Mairin	55.38	0.73	0.78	8.87
	MOL000239	Jaranol	50.83	0.61	0.29	15.5
	MOL000296	hederagenin	36.91	1.32	0.75	5.35
	MOL000033	(3S,8S,9S,10R,13R,14S,17R)-10,13-dimethyl-17-[(2R,5S)-5-propan-2-yloctan-2-yl]-2,3,4,7,8,9,11,12,14,15,16,17-dodecahydro-1H-cyclopenta[a]phenanthren-3-ol	36.23	1.45	0.78	5.22
	MOL000354	isorhamnetin	49.6	0.31	0.31	14.34
	MOL000371	3,9-di-O-methylnissolin	53.74	1.18	0.48	9
	MOL000380	(6aR,11aR)-9,10-dimethoxy-6a,11a-dihydro-6H-benzofurano[3,2-c]chromen-3-ol	64.26	0.93	0.42	8.49
	MOL000387	Bifendate	31.1	0.15	0.67	17.96
	MOL000392	formononetin	69.67	0.78	0.21	17.04
	MOL000398	isoflavanone	109.99	0.53	0.3	15.51
	MOL000417	Calycosin	47.75	0.52	0.24	17.1
	MOL000422	kaempferol	41.88	0.26	0.24	14.74
	MOL000442	1,7-Dihydroxy-3,9-dimethoxy pterocarpene	39.05	0.89	0.48	7.95
	MOL000098	quercetin	46.43	0.05	0.28	14.4
FLL	MOL000358	beta-sitosterol	36.91	1.32	0.75	5.36
	MOL000422	kaempferol	41.88	0.26	0.24	14.74
	MOL004576	taxifolin	57.84	-0.23	0.27	14.41
	MOL005147	Lucidumoside D_qt	54.41	-0.04	0.47	5.83
	MOL005169	(20S)-24-ene-3β,20-diol-3-acetate	40.23	1.09	0.82	9.14
	MOL005190	eriodictyol	71.79	0.17	0.24	15.81
	MOL005209	Lucidusculine	30.11	0.16	0.75	10.55
	MOL000006	luteolin	36.16	0.19	0.25	15.94
	MOL000098	quercetin	46.43	0.05	0.28	14.4
AMK	MOL000020	12-senecioyl-2E,8E,10E-atractylentriol	62.4	0.01	0.22	6.07
	MOL000021	14-acetyl-12-senecioyl-2E,8E,10E-atractylentriol	60.31	0.33	0.31	5.32
	MOL000022	14-acetyl-12-senecioyl-2E,8Z,10E-atractylentriol	63.37	0.42	0.3	6.43
	MOL000033	(3S,8S,9S,10R,13R,14S,17R)-10,13-dimethyl-17-[(2R,5S)-5-propan-2-yloctan-2-yl]-2,3,4,7,8,9,11,12,14,15,16,17-dodecahydro-1H-cyclopenta[a]phenanthren-3-ol	36.23	1.45	0.78	5.22
	MOL000072	8β-ethoxy atractylenolide Ⅲ	35.95	1.08	0.21	8.34
CR	MOL000358	beta-sitosterol	36.91	1.32	0.75	5.36
	MOL000359	sitosterol	36.91	1.32	0.75	5.37
	MOL004241	curcolactone	51.51	-0.02	0.2	5.77
	MOL004244	(4aR,5R,8R,8aR)-5,8-dihydroxy-3,5,8a-trimethyl-6,7,8,9-tetrahydro-4aH-benzo[f]benzofuran-4-one	59.52	0.15	0.2	13.62
	MOL004253	Curcumenolactone C	39.7	0.16	0.19	8.19
	MOL004260	(E)-1,7-Diphenyl-3-hydroxy-1-hepten-5-one	64.66	0.93	0.18	4.62
	MOL004263	(E)-5-Hydroxy-7-(4-hydroxyphenyl)-1-phenyl-1-heptene	46.9	1.04	0.19	5.01
	MOL004291	Oxycurcumenol	67.06	0.83	0.18	9.57
	MOL004316	1,7-Diphenyl-3-acetoxy-6(E)-hepten	48.47	1.42	0.22	4.59
	MOL004328	naringenin	59.29	0.28	0.21	16.98
PCW	MOL000273	(2R)-2-[(3S,5R,10S,13R,14R,16R,17R)-3,16-dihydroxy-4,4,10,13,14-pentamethyl-2,3,5,6,12,15,16,17-octahydro-1H-cyclopenta[a]phenanthren-17-yl]-6-methylhept-5-enoic acid	30.93	0.01	0.81	6.81
	MOL000275	trametenolic acid	38.71	0.52	0.8	7.78
	MOL000276	7,9(11)-dehydropachymic acid	35.11	0.03	0.81	7.34
	MOL000279	Cerevisterol	37.96	0.28	0.77	5.31
	MOL000280	(2R)-2-[(3S,5R,10S,13R,14R,16R,17R)-3,16-dihydroxy-4,4,10,13,14-pentamethyl-2,3,5,6,12,15,16,17-octahydro-1H-cyclopenta[a]phenanthren-17-yl]-5-isopropyl-hex-5-enoic acid	31.07	0.05	0.82	7.42
	MOL000282	ergosta-7,22E-dien-3beta-ol	43.51	1.32	0.72	5.11
	MOL000285	(2R)-2-[(5R,10S,13R,14R,16R,17R)-16-hydroxy-3-keto-4,4,10,13,14-pentamethyl-1,2,5,6,12,15,16,17-octahydrocyclopenta[a]phenanthren-17-yl]-5-isopropyl-hex-5-enoic acid	38.26	0.12	0.82	6.77
	MOL000287	3beta-Hydroxy-24-methylene-8-lanostene-21-oic acid	38.7	0.61	0.81	6.59
	MOL000289	pachymic acid	33.63	0.1	0.81	9.27
	MOL000290	Poricoic acid A	30.61	-0.14	0.76	8.26
	MOL000291	Poricoic acid B	30.52	-0.08	0.75	8.67
	MOL000292	poricoic acid C	38.15	0.32	0.75	7.73
	MOL000296	hederagenin	36.91	1.32	0.75	5.35
	MOL000300	dehydroeburicoic acid	44.17	0.38	0.83	7.04
OS	MOL012101	Mosloflavone	34.04	0.86	0.26	16.76
	MOL012108	Negletein	41.16	0.85	0.23	15.9
	MOL013058	2,5-dihydroxy-6,7-dimethoxyflavone	41.52	0.33	0.28	16.07
	MOL013059	3,7,3',5'-tetramethoxy-2hydrochroxyflavone	53.26	0.05	0.42	15.13
	MOL000173	wogonin	30.68	0.79	0.23	17.75
	MOL001735	Dinatin	30.97	0.48	0.27	16.44
	MOL002714	baicalein	33.52	0.63	0.21	16.25
	MOL002928	oroxylin a	41.37	0.76	0.23	17.15
	MOL003044	Chryseriol	35.85	0.39	0.27	16.31
	MOL000358	beta-sitosterol	36.91	1.32	0.75	5.36
	MOL004004	6-OH-Luteolin	46.93	0.14	0.28	14.62
	MOL000449	Stigmasterol	43.83	1.44	0.76	5.57
	MOL000471	aloe-emodin	83.38	-0.12	0.24	31.49
	MOL005030	gondoic acid	30.7	1.2	0.2	4.79
	MOL000098	quercetin	46.43	0.05	0.28	14.4
EHH	MOL013389	epieuphoscopin B	30.07	-0.19	0.76	8.14
	MOL013395	euphohelionone	35.47	0.23	0.47	4.01
	MOL013401	euphornin F	83.86	-0.2	0.78	4.95
	MOL013404	euphoscopin B	30.07	-0.09	0.75	7.05
	MOL013406	euphoscopin D	33.08	0.03	0.78	7.23
	MOL013407	euphoscopin E	79.84	-0.3	0.77	6.32
	MOL013415	helioscopinolide B	50.03	0.72	0.44	4.58
	MOL013416	helioscopinolide C	42.53	0.24	0.48	4.54
	MOL013425	(2R)-5-hydroxy-2-(4-hydroxyphenyl)-7-methoxychroman-4-one	39.6	0.52	0.24	15.98
	MOL001771	poriferast-5-en-3beta-ol	36.91	1.45	0.75	5.07
	MOL000358	beta-sitosterol	36.91	1.32	0.75	5.36
	MOL000422	kaempferol	41.88	0.26	0.24	14.74
	MOL004328	naringenin	59.29	0.28	0.21	16.98
	MOL000006	luteolin	36.16	0.19	0.25	15.94
	MOL000098	quercetin	46.43	0.05	0.28	14.4

## Sheet: compounds information
Compounds information of active compounds
Herbs	Molecule ID	Molecule	InChIKey	Pubchem Cid	CAS
HMM	MOL000211	Mairin	QGJZLNKBHJESQX-FZFNOLFKSA-N	64971	472-15-1
	MOL000239	Jaranol	BJBUTJQYZDYRMJ-UHFFFAOYSA-N	5318869	3301-49-3
	MOL000296	hederagenin	KZJWDPNRJALLNS-CQXWNKEUSA-N	N/A	465-99-6
	MOL000033	(3S,8S,9S,10R,13R,14S,17R)-10,13-dimethyl-17-[(2R,5S)-5-propan-2-yloctan-2-yl]-2,3,4,7,8,9,11,12,14,15,16,17-dodecahydro-1H-cyclopenta[a]phenanthren-3-ol	KLEXDBGYSOIREE-UIFQYPGESA-N	15976101	64997-52-0
	MOL000354	isorhamnetin	IZQSVPBOUDKVDZ-UHFFFAOYSA-N	5281654	480-19-3
	MOL000371	3,9-di-O-methylnissolin	RFFNFQZKHNKOPO-BBRMVZONSA-N	15689655	N/A
	MOL000380	(6aR,11aR)-9,10-dimethoxy-6a,11a-dihydro-6H-benzofurano[3,2-c]chromen-3-ol	UOVGCLXUTLXAEC-WFASDCNBSA-N	14077830	73340-41-7
	MOL000387	Bifendate	JMZOMFYRADAWOG-UHFFFAOYSA-N	108213	73536-69-3
	MOL000392	formononetin	INYISIYHXQDCPK-CQSZACIVSA-N	46881075	485-72-3
	MOL000398	isoflavanone	JNSVNRWHSLLCBG-LLVKDONJSA-N	N/A	N/A
	MOL000417	Calycosin	ZZAJQOPSWWVMBI-UHFFFAOYSA-N	5280448	20575-57-9
	MOL000422	kaempferol	IYRMWMYZSQPJKC-UHFFFAOYSA-N	5280863	520-18-3
	MOL000442	1,7-Dihydroxy-3,9-dimethoxy pterocarpene	RVGZSUMTFIEORY-UHFFFAOYSA-N	5316760	N/A
	MOL000098	quercetin	REFJWTPEDVJJIY-UHFFFAOYSA-N	5280343	73123-10-1
FLL	MOL000358	beta-sitosterol	KZJWDPNRJALLNS-VJSFXXLFSA-N	222284	83-46-5
	MOL000422	kaempferol	IYRMWMYZSQPJKC-UHFFFAOYSA-N	5280863	520-18-3
	MOL004576	taxifolin	CXQWRCVTCMQVQX-LSDHHAIUSA-N	439533	480-18-2
	MOL005147	Lucidumoside D_qt	OQXFUCDBVSEDNJ-KFAPORQYSA-N	N/A	104121-88-2
	MOL005169	(20S)-24-ene-3β,20-diol-3-acetate	QSUGODIDPUGIFV-MAROBCSHSA-N	N/A	22558-20-9
	MOL005190	eriodictyol	SBHXYTNGIZCORC-ZDUSSCGKSA-N	440735	552-58-9
	MOL005209	Lucidusculine	CZXUYBQFBFSXKM-ORDWSRHTSA-N	N/A	N/A
	MOL000006	luteolin	IQPNAANSBPBGFQ-UHFFFAOYSA-N	5280445	491-70-3
	MOL000098	quercetin	REFJWTPEDVJJIY-UHFFFAOYSA-N	5280343	73123-10-1
AMK	MOL000020	12-senecioyl-2E,8E,10E-atractylentriol	UJHAKGDWVZIMIT-PKPRIEKHSA-N	N/A	113269-39-9
	MOL000021	14-acetyl-12-senecioyl-2E,8E,10E-atractylentriol	CQDVFBMTEZFKKY-JAPNHWDDSA-N	N/A	113269-37-7
	MOL000022	14-acetyl-12-senecioyl-2E,8Z,10E-atractylentriol	CQDVFBMTEZFKKY-PUYRJQRLSA-N	N/A	113269-36-6
	MOL000033	(3S,8S,9S,10R,13R,14S,17R)-10,13-dimethyl-17-[(2R,5S)-5-propan-2-yloctan-2-yl]-2,3,4,7,8,9,11,12,14,15,16,17-dodecahydro-1H-cyclopenta[a]phenanthren-3-ol	KLEXDBGYSOIREE-UIFQYPGESA-N	15976101	64997-52-0
	MOL000072	8β-ethoxy atractylenolide Ⅲ	JATCNILBQFTWFJ-XKQJLSEDSA-N	14448075	113269-35-5
CR	MOL000358	beta-sitosterol	KZJWDPNRJALLNS-VJSFXXLFSA-N	222284	83-46-5
	MOL000359	sitosterol	KZJWDPNRJALLNS-ZFVHJZABSA-N	12303645	83-46-5
	MOL004241	curcolactone	BCMMNIMNKUKKCI-SIJPQNPESA-N	N/A	N/A
	MOL004244	(4aR,5R,8R,8aR)-5,8-dihydroxy-3,5,8a-trimethyl-6,7,8,9-tetrahydro-4aH-benzo[f]benzofuran-4-one	QXEXMTIZXNCRJO-QPKOPYBWSA-N	10683031	N/A
	MOL004253	Curcumenolactone C	JZIQIHGNLNKQKF-DWZYQQQCSA-N	N/A	N/A
	MOL004260	(E)-1,7-Diphenyl-3-hydroxy-1-hepten-5-one	NEQGOKAKPXXESR-YLZCUGDYSA-N	44559751	N/A
	MOL004263	(E)-5-Hydroxy-7-(4-hydroxyphenyl)-1-phenyl-1-heptene	PXPIJNMPDAFWSF-PYJQOMOHSA-N	44560892	N/A
	MOL004291	Oxycurcumenol	NMKYCFSNAWAALS-XSXPHNMFSA-N	N/A	N/A
	MOL004316	1,7-Diphenyl-3-acetoxy-6(E)-hepten	URJZIVZWAWBZCT-MOIAGMBASA-N	N/A	N/A
	MOL004328	naringenin	FTVWIRXFELQLPI-ZDUSSCGKSA-N	439246	153-18-4
PCW	MOL000273	(2R)-2-[(3S,5R,10S,13R,14R,16R,17R)-3,16-dihydroxy-4,4,10,13,14-pentamethyl-2,3,5,6,12,15,16,17-octahydro-1H-cyclopenta[a]phenanthren-17-yl]-6-methylhept-5-enoic acid	XSLKAKROJKMHIT-WIUKAADNSA-N	10743008	N/A
	MOL000275	trametenolic acid	NBSBUIQBEPROBM-QPOZJWKMSA-N	N/A	24160-36-9
	MOL000276	7,9(11)-dehydropachymic acid	RWIALJIVPUCERT-DRCQUEPLSA-N	15226717	77012-31-8
	MOL000279	Cerevisterol	ARXHRTZAVQOQEU-BRVLHLJYSA-N	10181133	516-37-0
	MOL000280	(2R)-2-[(3S,5R,10S,13R,14R,16R,17R)-3,16-dihydroxy-4,4,10,13,14-pentamethyl-2,3,5,6,12,15,16,17-octahydro-1H-cyclopenta[a]phenanthren-17-yl]-5-isopropyl-hex-5-enoic acid	LADJWZMBZBVBSB-YEXRKOARSA-N	15225964	6754-16-1
	MOL000282	ergosta-7,22E-dien-3beta-ol	QOXPZVASXWSKKU-UEIWAABPSA-N	5283628	1105-11-9
	MOL000285	(2R)-2-[(5R,10S,13R,14R,16R,17R)-16-hydroxy-3-keto-4,4,10,13,14-pentamethyl-1,2,5,6,12,15,16,17-octahydrocyclopenta[a]phenanthren-17-yl]-5-isopropyl-hex-5-enoic acid	KPKYWYZPIVAHKU-WMNQUVFJSA-N	9805290	465-18-9
	MOL000287	3beta-Hydroxy-24-methylene-8-lanostene-21-oic acid	UGMQOYZVOPASJF-OXUZYLMNSA-N	73402	N/A
	MOL000289	pachymic acid	VDYCLYGKCGVBHN-KVPCPLELSA-N	N/A	29070-92-6
	MOL000290	Poricoic acid A	KVAQLXUMUVEKGR-SMFZDKLCSA-N	5471851	137551-38-3
	MOL000291	Poricoic acid B	NXAZWYWJZDFISF-KXGBKNTBSA-N	5471852	137551-39-4
	MOL000292	poricoic acid C	QFVFCBZDUKVXLR-PKSIZLAPSA-N	56668247	151200-89-4
	MOL000296	hederagenin	KZJWDPNRJALLNS-CQXWNKEUSA-N	N/A	465-99-6
	MOL000300	dehydroeburicoic acid	WZWOZRZYBSGARK-NUPWKHSHSA-N	N/A	N/A
OS	MOL012101	Mosloflavone	SIVAITYPYQQYAP-UHFFFAOYSA-N	471722	740-33-0
	MOL012108	Negletein	ZTHLHHDJRXJGRX-UHFFFAOYSA-N	471719	29550-13-8
	MOL013058	2,5-dihydroxy-6,7-dimethoxyflavone	GDGDGXJBOLVFBL-QGZVFWFLSA-N	N/A	N/A
	MOL013059	3,7,3',5'-tetramethoxy-2hydrochroxyflavone	LQIWIQNIVFYMRE-OALUTQOASA-N	N/A	N/A
	MOL000173	wogonin	XLTFNNCXVBYBSX-UHFFFAOYSA-N	5281703	632-85-9
	MOL001735	Dinatin	IHFBPDAQLQOCBX-UHFFFAOYSA-N	5281628	1447-88-7
	MOL002714	baicalein	FXNFHKRTJBSTCS-UHFFFAOYSA-N	5281605	491-67-8
	MOL002928	oroxylin a	LKOJGSWUMISDOF-UHFFFAOYSA-N	5320315	480-11-5
	MOL003044	Chryseriol	SCZVLDHREVKTSH-UHFFFAOYSA-N	5280666	491-71-4
	MOL000358	beta-sitosterol	KZJWDPNRJALLNS-VJSFXXLFSA-N	222284	83-46-5
	MOL004004	6-OH-Luteolin	VYAKIUWQLHRZGK-UHFFFAOYSA-N	5281642	18003-33-3
	MOL000449	Stigmasterol	HCXVJBMSMIARIN-PHZDYDNGSA-N	5280794	83-48-7
	MOL000471	aloe-emodin	YDQWDHRMZQUTBA-UHFFFAOYSA-N	10207	481-72-1
	MOL005030	gondoic acid	BITHHVVYSMSWAG-KTKRTIGZSA-N	5282768	5561-99-9
	MOL000098	quercetin	REFJWTPEDVJJIY-UHFFFAOYSA-N	5280343	73123-10-1
EHH	MOL013389	epieuphoscopin B	JDXJTMWWGZXTGE-YDNAIEJESA-N	N/A	126372-45-0
	MOL013395	euphohelionone	RQJBWZAKLTVWPW-PIFYXPLCSA-N	N/A	95852-24-7
	MOL013401	euphornin F	FXSRXIVXXGEOIQ-PIQQBGBGSA-N	N/A	126372-48-3
	MOL013404	euphoscopin B	JDXJTMWWGZXTGE-HAUKJGJOSA-N	N/A	81557-52-0
	MOL013406	euphoscopin D	NASWNOUOFKORGJ-RIXHZDLRSA-N	N/A	87064-58-2
	MOL013407	euphoscopin E	YDIBJNYWGGQDRW-AIOUSAIRSA-N	N/A	126239-85-8
	MOL013415	helioscopinolide B	KZIADLALQLRZIQ-PANQXIRQSA-N	10335933	84799-32-6
	MOL013416	helioscopinolide C	PTWUMSGLZPRHJW-RZRATATOSA-N	N/A	84744-65-0
	MOL013425	(2R)-5-hydroxy-2-(4-hydroxyphenyl)-7-methoxychroman-4-one	DJOJDHGQRNZXQQ-CQSZACIVSA-N	821416	529-39-5
	MOL001771	poriferast-5-en-3beta-ol	KZJWDPNRJALLNS-FBZNIEFRSA-N	457801	83-46-5
	MOL000358	beta-sitosterol	KZJWDPNRJALLNS-VJSFXXLFSA-N	222284	83-46-5
	MOL000422	kaempferol	IYRMWMYZSQPJKC-UHFFFAOYSA-N	5280863	520-18-3
	MOL004328	naringenin	FTVWIRXFELQLPI-ZDUSSCGKSA-N	439246	153-18-4
	MOL000006	luteolin	IQPNAANSBPBGFQ-UHFFFAOYSA-N	5280445	491-70-3
	MOL000098	quercetin	REFJWTPEDVJJIY-UHFFFAOYSA-N	5280343	73123-10-1
