# Supplementary material for: Relieving Sore Throat Formula Exerts a Therapeutic Effect on Pharyngitis through Immunoregulation and NF-κB Pathway
Source: Mediators Inflamm. 2020 May 15;2020:2929163. doi: 10.1155/2020/2929163 (PMC7245656; doi:10.1155/2020/2929163)
Supplement: Supplementary 3 — Supplementary Table 2. Information of predicted RSTF targets. [file 2929163.f3.xlsx]

## Sheet: Sheet1
Supplementary Table 2 Information of predicted RSTF targets
Uniprot ID	Protein names	Gene names	Organism
P03372	Estrogen receptor	ESR1	Homo sapiens
P10275	Androgen receptor	AR	Homo sapiens
P06401	Progesterone receptor	PGR	Homo sapiens
P35228	Nitric oxide synthase, inducible	NOS2	Homo sapiens
P23219	Prostaglandin G/H synthase 1	PTGS1	Homo sapiens
P37231	Peroxisome proliferator activated receptor gamma	PPARG	Homo sapiens
P35354	Prostaglandin G/H synthase 2	PTGS2	Homo sapiens
P00918	Carbonic anhydrase II	CA2	Homo sapiens
P18031	mRNA of Protein-tyrosine phosphatase, non-receptor type 1	PTPN1	Homo sapiens
Q92731	Estrogen receptor beta	ESR2	Homo sapiens
Q16539	Mitogen-activated protein kinase 14	MAPK14	Homo sapiens
P49841	Glycogen synthase kinase-3 beta	GSK3B	Homo sapiens
P07900	Heat shock protein HSP 90	HSP90A	Homo sapiens
P24941	Cell division protein kinase 2	CDK2	Homo sapiens
P42336	Phosphatidylinositol-4,5-bisphosphate 3-kinase catalytic subunit, gamma isoform	PIK3CA	Homo sapiens
P9WKD3	Beta-lactamase	blaC	Homo sapiens
P11309	Proto-oncogene serine/threonine-protein kinase Pim-1	PIM1	Homo sapiens
P20248	Cyclin-A2	CCNA2	Homo sapiens
Q15596	Nuclear receptor coactivator 2	NCOA2	Homo sapiens
P27487	Dipeptidyl peptidase IV	DPP4	Homo sapiens
P15121	Aldose reductase	AKR1B1	Homo sapiens
P07477	Trypsin-1	PRSS1	Homo sapiens
O14757	Serine/threonine-protein kinase Chk1	CHEK1	Homo sapiens
P11388	DNA topoisomerase II	TOP2	Homo sapiens
Q16292	Thrombin	thrombin	Homo sapiens
Q12809	Potassium voltage-gated channel subfamily H member 2	KCNH2	Homo sapiens
Q14524	Sodium channel protein type 5 subunit alpha	SCN5A	Homo sapiens
P00742	Coagulation factor Xa	F10	Homo sapiens
P07550	Beta-2 adrenergic receptor	ADRB2	Homo sapiens
P08254	Stromelysin-1	MMP3	Homo sapiens
P17612	mRNA of PKA Catalytic Subunit C-alpha	PRKACA	Homo sapiens
P00451	Coagulation factor VII	F8	Homo sapiens
P29474	Nitric-oxide synthase, endothelial	NOS3	Homo sapiens
P19793	Retinoic acid receptor RXR-alpha	RXRA	Homo sapiens
P22303	Acetylcholinesterase	ACHE	Homo sapiens
P14867	Gamma-aminobutyric acid receptor subunit alpha-1	GABRA1	Homo sapiens
P27338	Amine oxidase [flavin-containing] B	MAOB	Homo sapiens
P04150	Glucocorticoid receptor	NR3C1	Homo sapiens
P0DP23	Calmodulin	CALM	Homo sapiens
P20309	Muscarinic acetylcholine receptor M3	CHRM3	Homo sapiens
P11229	Muscarinic acetylcholine receptor M1	CHRM1	Homo sapiens
P47869	Gamma-aminobutyric-acid receptor alpha-2 subunit	GABRA2	Homo sapiens
P34903	Gamma-aminobutyric-acid receptor alpha-3 subunit	GABRA3	Homo sapiens
P08172	Muscarinic acetylcholine receptor M2	CHRM2	Homo sapiens
P35368	Alpha-1B adrenergic receptor	ADRA1B	Homo sapiens
P42262	Glutamate receptor 2	GRIA2	Homo sapiens
Q16445	Gamma-aminobutyric-acid receptor subunit alpha-6	GABRA6	Homo sapiens
P31644	Gamma-aminobutyric-acid receptor alpha-5 subunit	GABRA5	Homo sapiens
P01857	Ig gamma-1 chain C region	IGHG1	Homo sapiens
P00325	Alcohol dehydrogenase 1B	ADH1B	Homo sapiens
P00326	Alcohol dehydrogenase 1C	ADH1C	Homo sapiens
P61626	Lysozyme	LYZ	Homo sapiens
Q05603	Nicotinate-nucleotide--dimethylbenzimidazole phosphoribosyltransferase	cobT	Homo sapiens
Q14432	CGMP-inhibited 3',5'-cyclic phosphodiesterase A	PDE3A	Homo sapiens
P23975	Sodium-dependent noradrenaline transporter	SLC6A2	Homo sapiens
P00183	Cytochrome P450-cam	camC	Homo sapiens
P11217	Glycogen phosphorylase, muscle form	PYGM	Homo sapiens
Q03181	Peroxisome proliferator activated receptor delta	PPARD	Homo sapiens
Q15788	Nuclear receptor coactivator 1	NCOA1	Homo sapiens
P08588	Beta-1 adrenergic receptor	ADRB1	Homo sapiens
P46098	5-hydroxytryptamine receptor 3A	HTR3A	Homo sapiens
P18825	Alpha-2C adrenergic receptor	ADRA2C	Homo sapiens
P25100	Alpha-1D adrenergic receptor	ADRA1D	Homo sapiens
P35372	Mu-type opioid receptor	OPRM1	Homo sapiens
P36544	Neuronal acetylcholine receptor protein, alpha-7 chain	CHRNA7	Homo sapiens
P08173	Muscarinic acetylcholine receptor M4	CHRM4	Homo sapiens
P35968	Vascular endothelial growth factor receptor 2	KDR	Homo sapiens
P08581	Hepatocyte growth factor receptor	MET	Homo sapiens
Q12791	Calcium-activated potassium channel subunit alpha 1	KCNMA1	Homo sapiens
P35348	Alpha-1A adrenergic receptor	ADRA1A	Homo sapiens
Q01959	Sodium-dependent dopamine transporter	SLC6A3	Homo sapiens
P31645	Sodium-dependent serotonin transporter	SLC6A4	Homo sapiens
P61925	cAMP-dependent protein kinase inhibitor alpha	PKIA	Homo sapiens
P21728	Dopamine D1 receptor	DRD1	Homo sapiens
P28223	5-hydroxytryptamine 2A receptor	HTR2A	Homo sapiens
Q15822	Neuronal acetylcholine receptor subunit alpha-2	CHRNA2	Homo sapiens
P08235	Mineralocorticoid receptor	NR3C2	Homo sapiens
P08913	Alpha-2A adrenergic receptor	ADRA2A	Homo sapiens
P00749	Urokinase-type plasminogen activator	PLAU	Homo sapiens
P09960	Leukotriene A-4 hydrolase	LTA4H	Homo sapiens
P21397	Amine oxidase [flavin-containing] A	MAOA	Homo sapiens
P17538	Chymotrypsinogen B	CTRB1	Homo sapiens
P08100	Rhodopsin	RHO	Homo sapiens
P06971	Ferrichrome-iron receptor	fhuA	Homo sapiens
