# Supplementary material for: Relieving Sore Throat Formula Exerts a Therapeutic Effect on Pharyngitis through Immunoregulation and NF-κB Pathway
Source: Mediators Inflamm. 2020 May 15;2020:2929163. doi: 10.1155/2020/2929163 (PMC7245656; doi:10.1155/2020/2929163)
Supplement: Supplementary 4 — Supplementary Table 3. Compound-target interaction information. [file 2929163.f4.xlsx]

## Sheet: Sheet1
Supplementary Table 3 Compound-targets interaction information
Herbs	Molecule ID	Molecule	Protein name	Gene name
HMM	MOL000033	(3S,8S,9S,10R,13R,14S,17R)-10,13-dimethyl-17-[(2R,5S)-5-propan-2-yloctan-2-yl]-2,3,4,7,8,9,11,12,14,15,16,17-dodecahydro-1H-cyclopenta[a]phenanthren-3-ol	Estrogen receptor	ESR1
	MOL000033	(3S,8S,9S,10R,13R,14S,17R)-10,13-dimethyl-17-[(2R,5S)-5-propan-2-yloctan-2-yl]-2,3,4,7,8,9,11,12,14,15,16,17-dodecahydro-1H-cyclopenta[a]phenanthren-3-ol	Androgen receptor	AR
	MOL000033	(3S,8S,9S,10R,13R,14S,17R)-10,13-dimethyl-17-[(2R,5S)-5-propan-2-yloctan-2-yl]-2,3,4,7,8,9,11,12,14,15,16,17-dodecahydro-1H-cyclopenta[a]phenanthren-3-ol	Progesterone receptor	PGR
	MOL000098	quercetin	Nitric oxide synthase, inducible	NOS2
	MOL000098	quercetin	Prostaglandin G/H synthase 1	PTGS1
	MOL000098	quercetin	Estrogen receptor	ESR1
	MOL000098	quercetin	Androgen receptor	AR
	MOL000098	quercetin	Peroxisome proliferator activated receptor gamma	PPARG
	MOL000098	quercetin	Prostaglandin G/H synthase 2	PTGS2
	MOL000098	quercetin	Carbonic anhydrase II	CA2
	MOL000098	quercetin	mRNA of Protein-tyrosine phosphatase, non-receptor type 1	PTPN1
	MOL000098	quercetin	Estrogen receptor beta	ESR2
	MOL000098	quercetin	Mitogen-activated protein kinase 14	MAPK14
	MOL000098	quercetin	Glycogen synthase kinase-3 beta	GSK3B
	MOL000098	quercetin	Heat shock protein HSP 90	HSP90A
	MOL000098	quercetin	Cell division protein kinase 2	CDK2
	MOL000098	quercetin	Phosphatidylinositol-4,5-bisphosphate 3-kinase catalytic subunit, gamma isoform	PIK3CA
	MOL000098	quercetin	Beta-lactamase	blaC
	MOL000098	quercetin	Proto-oncogene serine/threonine-protein kinase Pim-1	PIM1
	MOL000098	quercetin	Cyclin-A2	CCNA2
	MOL000098	quercetin	Nuclear receptor coactivator 2	NCOA2
	MOL000098	quercetin	Dipeptidyl peptidase IV	DPP4
	MOL000098	quercetin	Aldose reductase	AKR1B1
	MOL000098	quercetin	Trypsin-1	PRSS1
	MOL000098	quercetin	Serine/threonine-protein kinase Chk1	CHEK1
	MOL000098	quercetin	DNA topoisomerase II	TOP2
	MOL000098	quercetin	Thrombin	thrombin
	MOL000098	quercetin	Potassium voltage-gated channel subfamily H member 2	KCNH2
	MOL000098	quercetin	Sodium channel protein type 5 subunit alpha	SCN5A
	MOL000098	quercetin	Coagulation factor Xa	F10
	MOL000098	quercetin	Beta-2 adrenergic receptor	ADRB2
	MOL000098	quercetin	Stromelysin-1	MMP3
	MOL000098	quercetin	mRNA of PKA Catalytic Subunit C-alpha	PRKACA
	MOL000098	quercetin	Coagulation factor VII	F8
	MOL000098	quercetin	Nitric-oxide synthase, endothelial	NOS3
	MOL000098	quercetin	Retinoic acid receptor RXR-alpha	RXRA
	MOL000098	quercetin	Acetylcholinesterase	ACHE
	MOL000098	quercetin	Gamma-aminobutyric acid receptor subunit alpha-1	GABRA1
	MOL000098	quercetin	Amine oxidase [flavin-containing] B	MAOB
	MOL000211	Mairin	Estrogen receptor	ESR1
	MOL000211	Mairin	Androgen receptor	AR
	MOL000211	Mairin	Progesterone receptor	PGR
	MOL000211	Mairin	Glucocorticoid receptor	NR3C1
	MOL000239	Jaranol	Nitric oxide synthase, inducible	NOS2
	MOL000239	Jaranol	Prostaglandin G/H synthase 1	PTGS1
	MOL000239	Jaranol	Estrogen receptor	ESR1
	MOL000239	Jaranol	Androgen receptor	AR
	MOL000239	Jaranol	Sodium channel protein type 5 subunit alpha	SCN5A
	MOL000239	Jaranol	Peroxisome proliferator activated receptor gamma	PPARG
	MOL000239	Jaranol	Prostaglandin G/H synthase 2	PTGS2
	MOL000239	Jaranol	Carbonic anhydrase II	CA2
	MOL000239	Jaranol	mRNA of Protein-tyrosine phosphatase, non-receptor type 1	PTPN1
	MOL000239	Jaranol	Estrogen receptor beta	ESR2
	MOL000239	Jaranol	Dipeptidyl peptidase IV	DPP4
	MOL000239	Jaranol	Mitogen-activated protein kinase 14	MAPK14
	MOL000239	Jaranol	Glycogen synthase kinase-3 beta	GSK3B
	MOL000239	Jaranol	Heat shock protein HSP 90	HSP90A
	MOL000239	Jaranol	Cell division protein kinase 2	CDK2
	MOL000239	Jaranol	Serine/threonine-protein kinase Chk1	CHEK1
	MOL000239	Jaranol	Trypsin-1	PRSS1
	MOL000239	Jaranol	Proto-oncogene serine/threonine-protein kinase Pim-1	PIM1
	MOL000239	Jaranol	Cyclin-A2	CCNA2
	MOL000239	Jaranol	Nuclear receptor coactivator 2	NCOA2
	MOL000239	Jaranol	Calmodulin	CALM
	MOL000296	hederagenin	Estrogen receptor	ESR1
	MOL000296	hederagenin	Androgen receptor	AR
	MOL000296	hederagenin	Progesterone receptor	PGR
	MOL000296	hederagenin	Glucocorticoid receptor	NR3C1
	MOL000296	hederagenin	Nuclear receptor coactivator 2	NCOA2
	MOL000296	hederagenin	Muscarinic acetylcholine receptor M3	CHRM3
	MOL000296	hederagenin	Thrombin	thrombin
	MOL000296	hederagenin	Muscarinic acetylcholine receptor M1	CHRM1
	MOL000296	hederagenin	Gamma-aminobutyric-acid receptor alpha-2 subunit	GABRA2
	MOL000296	hederagenin	Acetylcholinesterase	ACHE
	MOL000296	hederagenin	Gamma-aminobutyric-acid receptor alpha-3 subunit	GABRA3
	MOL000296	hederagenin	Muscarinic acetylcholine receptor M2	CHRM2
	MOL000296	hederagenin	Alpha-1B adrenergic receptor	ADRA1B
	MOL000296	hederagenin	Gamma-aminobutyric acid receptor subunit alpha-1	GABRA1
	MOL000296	hederagenin	Dipeptidyl peptidase IV	DPP4
	MOL000296	hederagenin	Glutamate receptor 2	GRIA2
	MOL000296	hederagenin	Gamma-aminobutyric-acid receptor subunit alpha-6	GABRA6
	MOL000296	hederagenin	Gamma-aminobutyric-acid receptor alpha-5 subunit	GABRA5
	MOL000296	hederagenin	Ig gamma-1 chain C region	IGHG1
	MOL000296	hederagenin	Trypsin-1	PRSS1
	MOL000296	hederagenin	Alcohol dehydrogenase 1B	ADH1B
	MOL000296	hederagenin	Alcohol dehydrogenase 1C	ADH1C
	MOL000296	hederagenin	Lysozyme	LYZ
	MOL000296	hederagenin	Nicotinate-nucleotide--dimethylbenzimidazole phosphoribosyltransferase	cobT
	MOL000296	hederagenin	Prostaglandin G/H synthase 1	PTGS1
	MOL000296	hederagenin	Sodium channel protein type 5 subunit alpha	SCN5A
	MOL000296	hederagenin	Prostaglandin G/H synthase 2	PTGS2
	MOL000296	hederagenin	Retinoic acid receptor RXR-alpha	RXRA
	MOL000296	hederagenin	CGMP-inhibited 3',5'-cyclic phosphodiesterase A	PDE3A
	MOL000296	hederagenin	Sodium-dependent noradrenaline transporter	SLC6A2
	MOL000296	hederagenin	Peroxisome proliferator activated receptor gamma	PPARG
	MOL000296	hederagenin	Nitric-oxide synthase, endothelial	NOS3
	MOL000296	hederagenin	Cytochrome P450-cam	NOR51B_261
	MOL000296	hederagenin	Carbonic anhydrase II	CA2
	MOL000354	isorhamnetin	Nitric oxide synthase, inducible	NOS2
	MOL000354	isorhamnetin	Prostaglandin G/H synthase 1	PTGS1
	MOL000354	isorhamnetin	Estrogen receptor	ESR1
	MOL000354	isorhamnetin	Androgen receptor	AR
	MOL000354	isorhamnetin	Peroxisome proliferator activated receptor gamma	PPARG
	MOL000354	isorhamnetin	Prostaglandin G/H synthase 2	PTGS2
	MOL000354	isorhamnetin	Carbonic anhydrase II	CA2
	MOL000354	isorhamnetin	mRNA of Protein-tyrosine phosphatase, non-receptor type 1	PTPN1
	MOL000354	isorhamnetin	Estrogen receptor beta	ESR2
	MOL000354	isorhamnetin	Dipeptidyl peptidase IV	DPP4
	MOL000354	isorhamnetin	Mitogen-activated protein kinase 14	MAPK14
	MOL000354	isorhamnetin	Glycogen synthase kinase-3 beta	GSK3B
	MOL000354	isorhamnetin	Heat shock protein HSP 90	HSP90A
	MOL000354	isorhamnetin	Cell division protein kinase 2	CDK2
	MOL000354	isorhamnetin	Phosphatidylinositol-4,5-bisphosphate 3-kinase catalytic subunit, gamma isoform	PIK3CA
	MOL000354	isorhamnetin	Beta-lactamase	blaC
	MOL000354	isorhamnetin	mRNA of PKA Catalytic Subunit C-alpha	PRKACA
	MOL000354	isorhamnetin	Trypsin-1	PRSS1
	MOL000354	isorhamnetin	Proto-oncogene serine/threonine-protein kinase Pim-1	PIM1
	MOL000354	isorhamnetin	Cyclin-A2	CCNA2
	MOL000354	isorhamnetin	Nuclear receptor coactivator 2	NCOA2
	MOL000354	isorhamnetin	Calmodulin	CALM
	MOL000354	isorhamnetin	Glycogen phosphorylase, muscle form	PYGM
	MOL000354	isorhamnetin	Peroxisome proliferator activated receptor delta	PPARD
	MOL000354	isorhamnetin	Serine/threonine-protein kinase Chk1	CHEK1
	MOL000354	isorhamnetin	Aldose reductase	AKR1B1
	MOL000354	isorhamnetin	Nuclear receptor coactivator 1	NCOA1
	MOL000354	isorhamnetin	Coagulation factor VII	F8
	MOL000354	isorhamnetin	Thrombin	thrombin
	MOL000354	isorhamnetin	Nitric-oxide synthase, endothelial	NOS3
	MOL000354	isorhamnetin	Acetylcholinesterase	ACHE
	MOL000354	isorhamnetin	Gamma-aminobutyric acid receptor subunit alpha-1	GABRA1
	MOL000354	isorhamnetin	Amine oxidase [flavin-containing] B	MAOB
	MOL000354	isorhamnetin	Glutamate receptor 2	GRIA2
	MOL000354	isorhamnetin	Cytochrome P450-cam	NOR51B_261
	MOL000371	3,9-di-O-methylnissolin	Nitric oxide synthase, inducible	NOS2
	MOL000371	3,10-di-O-methylnissolin	Prostaglandin G/H synthase 1	PTGS1
	MOL000371	3,11-di-O-methylnissolin	Muscarinic acetylcholine receptor M3	CHRM3
	MOL000371	3,12-di-O-methylnissolin	Thrombin	thrombin
	MOL000371	3,13-di-O-methylnissolin	Muscarinic acetylcholine receptor M1	CHRM1
	MOL000371	3,14-di-O-methylnissolin	Estrogen receptor	ESR1
	MOL000371	3,15-di-O-methylnissolin	Androgen receptor	AR
	MOL000371	3,16-di-O-methylnissolin	Beta-1 adrenergic receptor	ADRB1
	MOL000371	3,17-di-O-methylnissolin	Sodium channel protein type 5 subunit alpha	SCN5A
	MOL000371	3,18-di-O-methylnissolin	Peroxisome proliferator activated receptor gamma	PPARG
	MOL000371	3,19-di-O-methylnissolin	Prostaglandin G/H synthase 2	PTGS2
	MOL000371	3,20-di-O-methylnissolin	Nitric-oxide synthase, endothelial	NOS3
	MOL000371	3,21-di-O-methylnissolin	5-hydroxytryptamine receptor 3A	HTR3A
	MOL000371	3,22-di-O-methylnissolin	Carbonic anhydrase II	CA2
	MOL000371	3,23-di-O-methylnissolin	Alpha-2C adrenergic receptor	ADRA2C
	MOL000371	3,24-di-O-methylnissolin	Retinoic acid receptor RXR-alpha	RXRA
	MOL000371	3,25-di-O-methylnissolin	Acetylcholinesterase	ACHE
	MOL000371	3,26-di-O-methylnissolin	CGMP-inhibited 3',5'-cyclic phosphodiesterase A	PDE3A
	MOL000371	3,27-di-O-methylnissolin	Alpha-1B adrenergic receptor	ADRA1B
	MOL000371	3,28-di-O-methylnissolin	mRNA of Protein-tyrosine phosphatase, non-receptor type 1	PTPN1
	MOL000371	3,29-di-O-methylnissolin	Beta-2 adrenergic receptor	ADRB2
	MOL000371	3,30-di-O-methylnissolin	Alpha-1D adrenergic receptor	ADRA1D
	MOL000371	3,31-di-O-methylnissolin	Mu-type opioid receptor	OPRM1
	MOL000371	3,32-di-O-methylnissolin	Estrogen receptor beta	ESR2
	MOL000371	3,33-di-O-methylnissolin	Gamma-aminobutyric acid receptor subunit alpha-1	GABRA1
	MOL000371	3,34-di-O-methylnissolin	Dipeptidyl peptidase IV	DPP4
	MOL000371	3,35-di-O-methylnissolin	Mitogen-activated protein kinase 14	MAPK14
	MOL000371	3,36-di-O-methylnissolin	Glycogen synthase kinase-3 beta	GSK3B
	MOL000371	3,37-di-O-methylnissolin	Cell division protein kinase 2	CDK2
	MOL000371	3,38-di-O-methylnissolin	Serine/threonine-protein kinase Chk1	CHEK1
	MOL000371	3,39-di-O-methylnissolin	Trypsin-1	PRSS1
	MOL000371	3,40-di-O-methylnissolin	Proto-oncogene serine/threonine-protein kinase Pim-1	PIM1
	MOL000371	3,41-di-O-methylnissolin	Cyclin-A2	CCNA2
	MOL000371	3,42-di-O-methylnissolin	Nuclear receptor coactivator 2	NCOA2
	MOL000371	3,43-di-O-methylnissolin	Calmodulin	CALM
	MOL000380	(6aR,11aR)-9,10-dimethoxy-6a,11a-dihydro-6H-benzofurano[3,2-c]chromen-3-ol	Nitric oxide synthase, inducible	NOS2
	MOL000380	(6aR,11aR)-9,10-dimethoxy-6a,11a-dihydro-6H-benzofurano[3,2-c]chromen-4-ol	Prostaglandin G/H synthase 1	PTGS1
	MOL000380	(6aR,11aR)-9,10-dimethoxy-6a,11a-dihydro-6H-benzofurano[3,2-c]chromen-5-ol	Muscarinic acetylcholine receptor M3	CHRM3
	MOL000380	(6aR,11aR)-9,10-dimethoxy-6a,11a-dihydro-6H-benzofurano[3,2-c]chromen-6-ol	Thrombin	thrombin
	MOL000380	(6aR,11aR)-9,10-dimethoxy-6a,11a-dihydro-6H-benzofurano[3,2-c]chromen-7-ol	Muscarinic acetylcholine receptor M1	CHRM1
	MOL000380	(6aR,11aR)-9,10-dimethoxy-6a,11a-dihydro-6H-benzofurano[3,2-c]chromen-8-ol	Estrogen receptor	ESR1
	MOL000380	(6aR,11aR)-9,10-dimethoxy-6a,11a-dihydro-6H-benzofurano[3,2-c]chromen-9-ol	Androgen receptor	AR
	MOL000380	(6aR,11aR)-9,10-dimethoxy-6a,11a-dihydro-6H-benzofurano[3,2-c]chromen-10-ol	Sodium channel protein type 5 subunit alpha	SCN5A
	MOL000380	(6aR,11aR)-9,10-dimethoxy-6a,11a-dihydro-6H-benzofurano[3,2-c]chromen-11-ol	Peroxisome proliferator activated receptor gamma	PPARG
	MOL000380	(6aR,11aR)-9,10-dimethoxy-6a,11a-dihydro-6H-benzofurano[3,2-c]chromen-12-ol	Prostaglandin G/H synthase 2	PTGS2
	MOL000380	(6aR,11aR)-9,10-dimethoxy-6a,11a-dihydro-6H-benzofurano[3,2-c]chromen-13-ol	5-hydroxytryptamine receptor 3A	HTR3A
	MOL000380	(6aR,11aR)-9,10-dimethoxy-6a,11a-dihydro-6H-benzofurano[3,2-c]chromen-14-ol	Carbonic anhydrase II	CA2
	MOL000380	(6aR,11aR)-9,10-dimethoxy-6a,11a-dihydro-6H-benzofurano[3,2-c]chromen-15-ol	Retinoic acid receptor RXR-alpha	RXRA
	MOL000380	(6aR,11aR)-9,10-dimethoxy-6a,11a-dihydro-6H-benzofurano[3,2-c]chromen-16-ol	Acetylcholinesterase	ACHE
	MOL000380	(6aR,11aR)-9,10-dimethoxy-6a,11a-dihydro-6H-benzofurano[3,2-c]chromen-17-ol	Alpha-1B adrenergic receptor	ADRA1B
	MOL000380	(6aR,11aR)-9,10-dimethoxy-6a,11a-dihydro-6H-benzofurano[3,2-c]chromen-18-ol	mRNA of Protein-tyrosine phosphatase, non-receptor type 1	PTPN1
	MOL000380	(6aR,11aR)-9,10-dimethoxy-6a,11a-dihydro-6H-benzofurano[3,2-c]chromen-19-ol	Beta-2 adrenergic receptor	ADRB2
	MOL000380	(6aR,11aR)-9,10-dimethoxy-6a,11a-dihydro-6H-benzofurano[3,2-c]chromen-20-ol	Alpha-1D adrenergic receptor	ADRA1D
	MOL000380	(6aR,11aR)-9,10-dimethoxy-6a,11a-dihydro-6H-benzofurano[3,2-c]chromen-21-ol	Estrogen receptor beta	ESR2
	MOL000380	(6aR,11aR)-9,10-dimethoxy-6a,11a-dihydro-6H-benzofurano[3,2-c]chromen-22-ol	Gamma-aminobutyric acid receptor subunit alpha-1	GABRA1
	MOL000380	(6aR,11aR)-9,10-dimethoxy-6a,11a-dihydro-6H-benzofurano[3,2-c]chromen-23-ol	Dipeptidyl peptidase IV	DPP4
	MOL000380	(6aR,11aR)-9,10-dimethoxy-6a,11a-dihydro-6H-benzofurano[3,2-c]chromen-24-ol	Mitogen-activated protein kinase 14	MAPK14
	MOL000380	(6aR,11aR)-9,10-dimethoxy-6a,11a-dihydro-6H-benzofurano[3,2-c]chromen-25-ol	Glycogen synthase kinase-3 beta	GSK3B
	MOL000380	(6aR,11aR)-9,10-dimethoxy-6a,11a-dihydro-6H-benzofurano[3,2-c]chromen-26-ol	Heat shock protein HSP 90	HSP90A
	MOL000380	(6aR,11aR)-9,10-dimethoxy-6a,11a-dihydro-6H-benzofurano[3,2-c]chromen-27-ol	Cell division protein kinase 2	CDK2
	MOL000380	(6aR,11aR)-9,10-dimethoxy-6a,11a-dihydro-6H-benzofurano[3,2-c]chromen-28-ol	Neuronal acetylcholine receptor protein, alpha-7 chain	CHRNA7
	MOL000380	(6aR,11aR)-9,10-dimethoxy-6a,11a-dihydro-6H-benzofurano[3,2-c]chromen-29-ol	Serine/threonine-protein kinase Chk1	CHEK1
	MOL000380	(6aR,11aR)-9,10-dimethoxy-6a,11a-dihydro-6H-benzofurano[3,2-c]chromen-30-ol	Trypsin-1	PRSS1
	MOL000380	(6aR,11aR)-9,10-dimethoxy-6a,11a-dihydro-6H-benzofurano[3,2-c]chromen-31-ol	Proto-oncogene serine/threonine-protein kinase Pim-1	PIM1
	MOL000380	(6aR,11aR)-9,10-dimethoxy-6a,11a-dihydro-6H-benzofurano[3,2-c]chromen-32-ol	Cyclin-A2	CCNA2
	MOL000380	(6aR,11aR)-9,10-dimethoxy-6a,11a-dihydro-6H-benzofurano[3,2-c]chromen-33-ol	Nuclear receptor coactivator 2	NCOA2
	MOL000380	(6aR,11aR)-9,10-dimethoxy-6a,11a-dihydro-6H-benzofurano[3,2-c]chromen-34-ol	Nuclear receptor coactivator 1	NCOA1
	MOL000380	(6aR,11aR)-9,10-dimethoxy-6a,11a-dihydro-6H-benzofurano[3,2-c]chromen-35-ol	Calmodulin	CALM
	MOL000380	(6aR,11aR)-9,10-dimethoxy-6a,11a-dihydro-6H-benzofurano[3,2-c]chromen-36-ol	Muscarinic acetylcholine receptor M4	CHRM4
	MOL000387	Bifendate	Thrombin	thrombin
	MOL000387	Bifendate	Estrogen receptor	ESR1
	MOL000387	Bifendate	Androgen receptor	AR
	MOL000387	Bifendate	Prostaglandin G/H synthase 2	PTGS2
	MOL000387	Bifendate	Vascular endothelial growth factor receptor 2	KDR
	MOL000387	Bifendate	Dipeptidyl peptidase IV	DPP4
	MOL000387	Bifendate	Hepatocyte growth factor receptor	MET
	MOL000387	Bifendate	Glycogen synthase kinase-3 beta	GSK3B
	MOL000387	Bifendate	Heat shock protein HSP 90	HSP90A
	MOL000387	Bifendate	Cell division protein kinase 2	CDK2
	MOL000387	Bifendate	Calcium-activated potassium channel subunit alpha 1	KCNMA1
	MOL000387	Bifendate	Nitric oxide synthase, inducible	NOS2
	MOL000387	Bifendate	Prostaglandin G/H synthase 1	PTGS1
	MOL000387	Bifendate	DNA topoisomerase II	TOP2
	MOL000392	formononetin	Nitric oxide synthase, inducible	NOS2
	MOL000392	formononetin	Prostaglandin G/H synthase 1	PTGS1
	MOL000392	formononetin	Muscarinic acetylcholine receptor M1	CHRM1
	MOL000392	formononetin	Estrogen receptor	ESR1
	MOL000392	formononetin	Androgen receptor	AR
	MOL000392	formononetin	Peroxisome proliferator activated receptor gamma	PPARG
	MOL000392	formononetin	Prostaglandin G/H synthase 2	PTGS2
	MOL000392	formononetin	Carbonic anhydrase II	CA2
	MOL000392	formononetin	Retinoic acid receptor RXR-alpha	RXRA
	MOL000392	formononetin	CGMP-inhibited 3',5'-cyclic phosphodiesterase A	PDE3A
	MOL000392	formononetin	Alpha-1A adrenergic receptor	ADRA1A
	MOL000392	formononetin	mRNA of Protein-tyrosine phosphatase, non-receptor type 1	PTPN1
	MOL000392	formononetin	Sodium-dependent dopamine transporter	SLC6A3
	MOL000392	formononetin	Beta-2 adrenergic receptor	ADRB2
	MOL000392	formononetin	Sodium-dependent serotonin transporter	SLC6A4
	MOL000392	formononetin	Estrogen receptor beta	ESR2
	MOL000392	formononetin	Dipeptidyl peptidase IV	DPP4
	MOL000392	formononetin	Mitogen-activated protein kinase 14	MAPK14
	MOL000392	formononetin	Glycogen synthase kinase-3 beta	GSK3B
	MOL000392	formononetin	Heat shock protein HSP 90	HSP90A
	MOL000392	formononetin	Cell division protein kinase 2	CDK2
	MOL000392	formononetin	Amine oxidase [flavin-containing] B	MAOB
	MOL000392	formononetin	Serine/threonine-protein kinase Chk1	CHEK1
	MOL000392	formononetin	mRNA of PKA Catalytic Subunit C-alpha	PRKACA
	MOL000392	formononetin	Trypsin-1	PRSS1
	MOL000392	formononetin	Proto-oncogene serine/threonine-protein kinase Pim-1	PIM1
	MOL000392	formononetin	Cyclin-A2	CCNA2
	MOL000392	formononetin	Calmodulin	CALM
	MOL000392	formononetin	cAMP-dependent protein kinase inhibitor alpha	PKIA
	MOL000392	formononetin	Thrombin	thrombin
	MOL000392	formononetin	Nitric-oxide synthase, endothelial	NOS3
	MOL000392	formononetin	Acetylcholinesterase	ACHE
	MOL000392	formononetin	Beta-lactamase	blaC
	MOL000417	Calycosin	Nitric oxide synthase, inducible	NOS2
	MOL000417	Calycosin	Prostaglandin G/H synthase 1	PTGS1
	MOL000417	Calycosin	Estrogen receptor	ESR1
	MOL000417	Calycosin	Androgen receptor	AR
	MOL000417	Calycosin	Peroxisome proliferator activated receptor gamma	PPARG
	MOL000417	Calycosin	Prostaglandin G/H synthase 2	PTGS2
	MOL000417	Calycosin	Carbonic anhydrase II	CA2
	MOL000417	Calycosin	Retinoic acid receptor RXR-alpha	RXRA
	MOL000417	Calycosin	CGMP-inhibited 3',5'-cyclic phosphodiesterase A	PDE3A
	MOL000417	Calycosin	mRNA of Protein-tyrosine phosphatase, non-receptor type 1	PTPN1
	MOL000417	Calycosin	Estrogen receptor beta	ESR2
	MOL000417	Calycosin	Dipeptidyl peptidase IV	DPP4
	MOL000417	Calycosin	Mitogen-activated protein kinase 14	MAPK14
	MOL000417	Calycosin	Glycogen synthase kinase-3 beta	GSK3B
	MOL000417	Calycosin	Heat shock protein HSP 90	HSP90A
	MOL000417	Calycosin	Cell division protein kinase 2	CDK2
	MOL000417	Calycosin	Serine/threonine-protein kinase Chk1	CHEK1
	MOL000417	Calycosin	mRNA of PKA Catalytic Subunit C-alpha	PRKACA
	MOL000417	Calycosin	Trypsin-1	PRSS1
	MOL000417	Calycosin	Proto-oncogene serine/threonine-protein kinase Pim-1	PIM1
	MOL000417	Calycosin	Cyclin-A2	CCNA2
	MOL000417	Calycosin	Nuclear receptor coactivator 2	NCOA2
	MOL000417	Calycosin	Calmodulin	CALM
	MOL000417	Calycosin	Beta-lactamase	blaC
	MOL000417	Calycosin	Beta-2 adrenergic receptor	ADRB2
	MOL000422	kaempferol	Nitric oxide synthase, inducible	NOS2
	MOL000422	kaempferol	Prostaglandin G/H synthase 1	PTGS1
	MOL000422	kaempferol	Estrogen receptor	ESR1
	MOL000422	kaempferol	Androgen receptor	AR
	MOL000422	kaempferol	Peroxisome proliferator activated receptor gamma	PPARG
	MOL000422	kaempferol	Prostaglandin G/H synthase 2	PTGS2
	MOL000422	kaempferol	Carbonic anhydrase II	CA2
	MOL000422	kaempferol	mRNA of Protein-tyrosine phosphatase, non-receptor type 1	PTPN1
	MOL000422	kaempferol	Estrogen receptor beta	ESR2
	MOL000422	kaempferol	Mitogen-activated protein kinase 14	MAPK14
	MOL000422	kaempferol	Glycogen synthase kinase-3 beta	GSK3B
	MOL000422	kaempferol	Heat shock protein HSP 90	HSP90A
	MOL000422	kaempferol	Cell division protein kinase 2	CDK2
	MOL000422	kaempferol	Phosphatidylinositol-4,5-bisphosphate 3-kinase catalytic subunit, gamma isoform	PIK3CA
	MOL000422	kaempferol	mRNA of PKA Catalytic Subunit C-alpha	PRKACA
	MOL000422	kaempferol	Proto-oncogene serine/threonine-protein kinase Pim-1	PIM1
	MOL000422	kaempferol	Nuclear receptor coactivator 2	NCOA2
	MOL000422	kaempferol	Cyclin-A2	CCNA2
	MOL000422	kaempferol	Dipeptidyl peptidase IV	DPP4
	MOL000422	kaempferol	Beta-lactamase	blaC
	MOL000422	kaempferol	Serine/threonine-protein kinase Chk1	CHEK1
	MOL000422	kaempferol	Trypsin-1	PRSS1
	MOL000422	kaempferol	Progesterone receptor	PGR
	MOL000422	kaempferol	Thrombin	thrombin
	MOL000422	kaempferol	Muscarinic acetylcholine receptor M1	CHRM1
	MOL000422	kaempferol	Nitric-oxide synthase, endothelial	NOS3
	MOL000422	kaempferol	Gamma-aminobutyric-acid receptor alpha-2 subunit	GABRA2
	MOL000422	kaempferol	Acetylcholinesterase	ACHE
	MOL000422	kaempferol	Sodium-dependent noradrenaline transporter	SLC6A2
	MOL000422	kaempferol	Muscarinic acetylcholine receptor M2	CHRM2
	MOL000422	kaempferol	Alpha-1B adrenergic receptor	ADRA1B
	MOL000422	kaempferol	Gamma-aminobutyric acid receptor subunit alpha-1	GABRA1
	MOL000422	kaempferol	DNA topoisomerase II	TOP2
	MOL000422	kaempferol	Coagulation factor VII	F8
	MOL000422	kaempferol	Calmodulin	CALM
	MOL000442	kaempferol	Nitric oxide synthase, inducible	NOS2
	MOL000442	kaempferol	Estrogen receptor	ESR1
	MOL000442	kaempferol	Androgen receptor	AR
	MOL000442	kaempferol	Peroxisome proliferator activated receptor gamma	PPARG
	MOL000442	kaempferol	Prostaglandin G/H synthase 2	PTGS2
	MOL000442	kaempferol	Retinoic acid receptor RXR-alpha	RXRA
	MOL000442	kaempferol	mRNA of Protein-tyrosine phosphatase, non-receptor type 1	PTPN1
	MOL000442	kaempferol	Estrogen receptor beta	ESR2
	MOL000442	kaempferol	Mitogen-activated protein kinase 14	MAPK14
	MOL000442	kaempferol	Glycogen synthase kinase-3 beta	GSK3B
	MOL000442	kaempferol	Heat shock protein HSP 90	HSP90A
	MOL000442	kaempferol	Cell division protein kinase 2	CDK2
	MOL000442	kaempferol	Serine/threonine-protein kinase Chk1	CHEK1
	MOL000442	kaempferol	Trypsin-1	PRSS1
	MOL000442	kaempferol	Proto-oncogene serine/threonine-protein kinase Pim-1	PIM1
	MOL000442	kaempferol	Cyclin-A2	CCNA2
FLL	MOL000006	luteolin	Nitric oxide synthase, inducible	NOS2
	MOL000006	luteolin	Prostaglandin G/H synthase 1	PTGS1
	MOL000006	luteolin	Estrogen receptor	ESR1
	MOL000006	luteolin	Androgen receptor	AR
	MOL000006	luteolin	Peroxisome proliferator activated receptor gamma	PPARG
	MOL000006	luteolin	Prostaglandin G/H synthase 2	PTGS2
	MOL000006	luteolin	Carbonic anhydrase II	CA2
	MOL000006	luteolin	mRNA of Protein-tyrosine phosphatase, non-receptor type 1	PTPN1
	MOL000006	luteolin	Estrogen receptor beta	ESR2
	MOL000006	luteolin	Mitogen-activated protein kinase 14	MAPK14
	MOL000006	luteolin	Heat shock protein HSP 90	HSP90A
	MOL000006	luteolin	Cell division protein kinase 2	CDK2
	MOL000006	luteolin	Trypsin-1	PRSS1
	MOL000006	luteolin	Proto-oncogene serine/threonine-protein kinase Pim-1	PIM1
	MOL000006	luteolin	Cyclin-A2	CCNA2
	MOL000006	luteolin	Nuclear receptor coactivator 2	NCOA2
	MOL000006	luteolin	Glycogen synthase kinase-3 beta	GSK3B
	MOL000006	luteolin	mRNA of PKA Catalytic Subunit C-alpha	PRKACA
	MOL000006	luteolin	Dipeptidyl peptidase IV	DPP4
	MOL000006	luteolin	Phosphatidylinositol-4,5-bisphosphate 3-kinase catalytic subunit, gamma isoform	PIK3CA
	MOL000098	quercetin	Nitric oxide synthase, inducible	NOS2
	MOL000098	quercetin	Prostaglandin G/H synthase 1	PTGS1
	MOL000098	quercetin	Estrogen receptor	ESR1
	MOL000098	quercetin	Androgen receptor	AR
	MOL000098	quercetin	Peroxisome proliferator activated receptor gamma	PPARG
	MOL000098	quercetin	Prostaglandin G/H synthase 2	PTGS2
	MOL000098	quercetin	Carbonic anhydrase II	CA2
	MOL000098	quercetin	mRNA of Protein-tyrosine phosphatase, non-receptor type 1	PTPN1
	MOL000098	quercetin	Estrogen receptor beta	ESR2
	MOL000098	quercetin	Mitogen-activated protein kinase 14	MAPK14
	MOL000098	quercetin	Glycogen synthase kinase-3 beta	GSK3B
	MOL000098	quercetin	Heat shock protein HSP 90	HSP90A
	MOL000098	quercetin	Cell division protein kinase 2	CDK2
	MOL000098	quercetin	Phosphatidylinositol-4,5-bisphosphate 3-kinase catalytic subunit, gamma isoform	PIK3CA
	MOL000098	quercetin	Beta-lactamase	blaC
	MOL000098	quercetin	Proto-oncogene serine/threonine-protein kinase Pim-1	PIM1
	MOL000098	quercetin	Cyclin-A2	CCNA2
	MOL000098	quercetin	Nuclear receptor coactivator 2	NCOA2
	MOL000098	quercetin	Dipeptidyl peptidase IV	DPP4
	MOL000098	quercetin	Aldose reductase	AKR1B1
	MOL000098	quercetin	Trypsin-1	PRSS1
	MOL000098	quercetin	Serine/threonine-protein kinase Chk1	CHEK1
	MOL000098	quercetin	DNA topoisomerase II	TOP2
	MOL000098	quercetin	Thrombin	thrombin
	MOL000098	quercetin	Potassium voltage-gated channel subfamily H member 2	KCNH2
	MOL000098	quercetin	Sodium channel protein type 5 subunit alpha	SCN5A
	MOL000098	quercetin	Coagulation factor Xa	F10
	MOL000098	quercetin	Beta-2 adrenergic receptor	ADRB2
	MOL000098	quercetin	Stromelysin-1	MMP3
	MOL000098	quercetin	mRNA of PKA Catalytic Subunit C-alpha	PRKACA
	MOL000098	quercetin	Coagulation factor VII	F8
	MOL000098	quercetin	Nitric-oxide synthase, endothelial	NOS3
	MOL000098	quercetin	Retinoic acid receptor RXR-alpha	RXRA
	MOL000098	quercetin	Acetylcholinesterase	ACHE
	MOL000098	quercetin	Gamma-aminobutyric acid receptor subunit alpha-1	GABRA1
	MOL000098	quercetin	Amine oxidase [flavin-containing] B	MAOB
	MOL000358	beta-sitosterol	Estrogen receptor	ESR1
	MOL000358	beta-sitosterol	Androgen receptor	AR
	MOL000358	beta-sitosterol	Progesterone receptor	PGR
	MOL000358	beta-sitosterol	Glucocorticoid receptor	NR3C1
	MOL000358	beta-sitosterol	Nuclear receptor coactivator 2	NCOA2
	MOL000358	beta-sitosterol	Nitric oxide synthase, inducible	NOS2
	MOL000358	beta-sitosterol	Prostaglandin G/H synthase 1	PTGS1
	MOL000358	beta-sitosterol	Peroxisome proliferator activated receptor gamma	PPARG
	MOL000358	beta-sitosterol	Prostaglandin G/H synthase 2	PTGS2
	MOL000358	beta-sitosterol	Carbonic anhydrase II	CA2
	MOL000358	beta-sitosterol	mRNA of Protein-tyrosine phosphatase, non-receptor type 1	PTPN1
	MOL000358	beta-sitosterol	Estrogen receptor beta	ESR2
	MOL000358	beta-sitosterol	Mitogen-activated protein kinase 14	MAPK14
	MOL000358	beta-sitosterol	Glycogen synthase kinase-3 beta	GSK3B
	MOL000358	beta-sitosterol	Heat shock protein HSP 90	HSP90A
	MOL000358	beta-sitosterol	Cell division protein kinase 2	CDK2
	MOL000358	beta-sitosterol	Phosphatidylinositol-4,5-bisphosphate 3-kinase catalytic subunit, gamma isoform	PIK3CA
	MOL000358	beta-sitosterol	Beta-lactamase	blaC
	MOL000358	beta-sitosterol	Proto-oncogene serine/threonine-protein kinase Pim-1	PIM1
	MOL000358	beta-sitosterol	Cyclin-A2	CCNA2
	MOL000358	beta-sitosterol	Thrombin	thrombin
	MOL000358	beta-sitosterol	Potassium voltage-gated channel subfamily H member 2	KCNH2
	MOL000358	beta-sitosterol	Serine/threonine-protein kinase Chk1	CHEK1
	MOL000358	beta-sitosterol	mRNA of PKA Catalytic Subunit C-alpha	PRKACA
	MOL000358	beta-sitosterol	Trypsin-1	PRSS1
	MOL000358	beta-sitosterol	Dopamine D1 receptor	DRD1
	MOL000358	beta-sitosterol	Muscarinic acetylcholine receptor M3	CHRM3
	MOL000358	beta-sitosterol	Muscarinic acetylcholine receptor M1	CHRM1
	MOL000358	beta-sitosterol	Sodium channel protein type 5 subunit alpha	SCN5A
	MOL000358	beta-sitosterol	Gamma-aminobutyric-acid receptor alpha-2 subunit	GABRA2
	MOL000358	beta-sitosterol	Muscarinic acetylcholine receptor M4	CHRM4
	MOL000358	beta-sitosterol	CGMP-inhibited 3',5'-cyclic phosphodiesterase A	PDE3A
	MOL000358	beta-sitosterol	5-hydroxytryptamine 2A receptor	HTR2A
	MOL000358	beta-sitosterol	Gamma-aminobutyric-acid receptor alpha-5 subunit	GABRA5
	MOL000358	beta-sitosterol	Alpha-1A adrenergic receptor	ADRA1A
	MOL000358	beta-sitosterol	Gamma-aminobutyric-acid receptor alpha-3 subunit	GABRA3
	MOL000358	beta-sitosterol	Muscarinic acetylcholine receptor M2	CHRM2
	MOL000358	beta-sitosterol	Alpha-1B adrenergic receptor	ADRA1B
	MOL000358	beta-sitosterol	Beta-2 adrenergic receptor	ADRB2
	MOL000358	beta-sitosterol	Neuronal acetylcholine receptor subunit alpha-2	CHRNA2
	MOL000358	beta-sitosterol	Sodium-dependent serotonin transporter	SLC6A4
	MOL000358	beta-sitosterol	Mu-type opioid receptor	OPRM1
	MOL000358	beta-sitosterol	Gamma-aminobutyric acid receptor subunit alpha-1	GABRA1
	MOL000358	beta-sitosterol	Dipeptidyl peptidase IV	DPP4
	MOL000358	beta-sitosterol	Neuronal acetylcholine receptor protein, alpha-7 chain	CHRNA7
	MOL000358	beta-sitosterol	Cytochrome P450-cam	NOR51B_261
	MOL000358	beta-sitosterol	Acetylcholinesterase	ACHE
	MOL000422	kaempferol	Nitric oxide synthase, inducible	NOS2
	MOL000422	kaempferol	Prostaglandin G/H synthase 1	PTGS1
	MOL000422	kaempferol	Estrogen receptor	ESR1
	MOL000422	kaempferol	Androgen receptor	AR
	MOL000422	kaempferol	Peroxisome proliferator activated receptor gamma	PPARG
	MOL000422	kaempferol	Prostaglandin G/H synthase 2	PTGS2
	MOL000422	kaempferol	Carbonic anhydrase II	CA2
	MOL000422	kaempferol	mRNA of Protein-tyrosine phosphatase, non-receptor type 1	PTPN1
	MOL000422	kaempferol	Estrogen receptor beta	ESR2
	MOL000422	kaempferol	Mitogen-activated protein kinase 14	MAPK14
	MOL000422	kaempferol	Glycogen synthase kinase-3 beta	GSK3B
	MOL000422	kaempferol	Heat shock protein HSP 90	HSP90A
	MOL000422	kaempferol	Cell division protein kinase 2	CDK2
	MOL000422	kaempferol	Phosphatidylinositol-4,5-bisphosphate 3-kinase catalytic subunit, gamma isoform	PIK3CA
	MOL000422	kaempferol	mRNA of PKA Catalytic Subunit C-alpha	PRKACA
	MOL000422	kaempferol	Proto-oncogene serine/threonine-protein kinase Pim-1	PIM1
	MOL000422	kaempferol	Nuclear receptor coactivator 2	NCOA2
	MOL000422	kaempferol	Cyclin-A2	CCNA2
	MOL000422	kaempferol	Dipeptidyl peptidase IV	DPP4
	MOL000422	kaempferol	Beta-lactamase	blaC
	MOL000422	kaempferol	Serine/threonine-protein kinase Chk1	CHEK1
	MOL000422	kaempferol	Trypsin-1	PRSS1
	MOL000422	kaempferol	Progesterone receptor	PGR
	MOL000422	kaempferol	Thrombin	thrombin
	MOL000422	kaempferol	Muscarinic acetylcholine receptor M1	CHRM1
	MOL000422	kaempferol	Nitric-oxide synthase, endothelial	NOS3
	MOL000422	kaempferol	Gamma-aminobutyric-acid receptor alpha-2 subunit	GABRA2
	MOL000422	kaempferol	Acetylcholinesterase	ACHE
	MOL000422	kaempferol	Sodium-dependent noradrenaline transporter	SLC6A2
	MOL000422	kaempferol	Muscarinic acetylcholine receptor M2	CHRM2
	MOL000422	kaempferol	Alpha-1B adrenergic receptor	ADRA1B
	MOL000422	kaempferol	Gamma-aminobutyric acid receptor subunit alpha-1	GABRA1
	MOL000422	kaempferol	DNA topoisomerase II	TOP2
	MOL000422	kaempferol	Coagulation factor VII	F8
	MOL000422	kaempferol	Calmodulin	CALM
AMK	MOL000022	14-acetyl-12-senecioyl-2E,8Z,10E-atractylentriol	Thrombin	thrombin
	MOL000022	14-acetyl-12-senecioyl-2E,8Z,10E-atractylentriol	Estrogen receptor	ESR1
	MOL000022	14-acetyl-12-senecioyl-2E,8Z,10E-atractylentriol	Peroxisome proliferator activated receptor gamma	PPARG
	MOL000022	14-acetyl-12-senecioyl-2E,8Z,10E-atractylentriol	Prostaglandin G/H synthase 2	PTGS2
	MOL000033	(3S,8S,9S,10R,13R,14S,17R)-10,13-dimethyl-17-[(2R,5S)-5-propan-2-yloctan-2-yl]-2,3,4,7,8,9,11,12,14,15,16,17-dodecahydro-1H-cyclopenta[a]phenanthren-3-ol	Estrogen receptor	ESR1
	MOL000033	(3S,8S,9S,10R,13R,14S,17R)-10,13-dimethyl-17-[(2R,5S)-5-propan-2-yloctan-2-yl]-2,3,4,7,8,9,11,12,14,15,16,17-dodecahydro-1H-cyclopenta[a]phenanthren-3-ol	Androgen receptor	AR
	MOL000033	(3S,8S,9S,10R,13R,14S,17R)-10,13-dimethyl-17-[(2R,5S)-5-propan-2-yloctan-2-yl]-2,3,4,7,8,9,11,12,14,15,16,17-dodecahydro-1H-cyclopenta[a]phenanthren-3-ol	Progesterone receptor	PGR
	MOL000072	8β-ethoxy atractylenolide Ⅲ	Nitric oxide synthase, inducible	NOS2
	MOL000072	8β-ethoxy atractylenolide Ⅲ	Thrombin	thrombin
	MOL000072	8β-ethoxy atractylenolide Ⅲ	Estrogen receptor	ESR1
	MOL000072	8β-ethoxy atractylenolide Ⅲ	Androgen receptor	AR
	MOL000072	8β-ethoxy atractylenolide Ⅲ	Prostaglandin G/H synthase 2	PTGS2
	MOL000072	8β-ethoxy atractylenolide Ⅲ	Nitric-oxide synthase, endothelial	NOS3
	MOL000072	8β-ethoxy atractylenolide Ⅲ	Acetylcholinesterase	ACHE
	MOL000072	8β-ethoxy atractylenolide Ⅲ	Gamma-aminobutyric acid receptor subunit alpha-1	GABRA1
	MOL000072	8β-ethoxy atractylenolide Ⅲ	Dipeptidyl peptidase IV	DPP4
	MOL000072	8β-ethoxy atractylenolide Ⅲ	Neuronal acetylcholine receptor protein, alpha-7 chain	CHRNA7
	MOL000072	8β-ethoxy atractylenolide Ⅲ	Nuclear receptor coactivator 2	NCOA2
	MOL000072	8β-ethoxy atractylenolide Ⅲ	Nuclear receptor coactivator 1	NCOA1
CR	MOL000358	beta-sitosterol	Estrogen receptor	ESR1
	MOL000358	beta-sitosterol	Androgen receptor	AR
	MOL000358	beta-sitosterol	Progesterone receptor	PGR
	MOL000358	beta-sitosterol	Glucocorticoid receptor	NR3C1
	MOL000358	beta-sitosterol	Nuclear receptor coactivator 2	NCOA2
	MOL000358	beta-sitosterol	Nitric oxide synthase, inducible	NOS2
	MOL000358	beta-sitosterol	Prostaglandin G/H synthase 1	PTGS1
	MOL000358	beta-sitosterol	Peroxisome proliferator activated receptor gamma	PPARG
	MOL000358	beta-sitosterol	Prostaglandin G/H synthase 2	PTGS2
	MOL000358	beta-sitosterol	Carbonic anhydrase II	CA2
	MOL000358	beta-sitosterol	mRNA of Protein-tyrosine phosphatase, non-receptor type 1	PTPN1
	MOL000358	beta-sitosterol	Estrogen receptor beta	ESR2
	MOL000358	beta-sitosterol	Mitogen-activated protein kinase 14	MAPK14
	MOL000358	beta-sitosterol	Glycogen synthase kinase-3 beta	GSK3B
	MOL000358	beta-sitosterol	Heat shock protein HSP 90	HSP90A
	MOL000358	beta-sitosterol	Cell division protein kinase 2	CDK2
	MOL000358	beta-sitosterol	Phosphatidylinositol-4,5-bisphosphate 3-kinase catalytic subunit, gamma isoform	PIK3CA
	MOL000358	beta-sitosterol	Beta-lactamase	blaC
	MOL000358	beta-sitosterol	Proto-oncogene serine/threonine-protein kinase Pim-1	PIM1
	MOL000358	beta-sitosterol	Cyclin-A2	CCNA2
	MOL000358	beta-sitosterol	Thrombin	thrombin
	MOL000358	beta-sitosterol	Potassium voltage-gated channel subfamily H member 2	KCNH2
	MOL000358	beta-sitosterol	Serine/threonine-protein kinase Chk1	CHEK1
	MOL000358	beta-sitosterol	mRNA of PKA Catalytic Subunit C-alpha	PRKACA
	MOL000358	beta-sitosterol	Trypsin-1	PRSS1
	MOL000358	beta-sitosterol	Dopamine D1 receptor	DRD1
	MOL000358	beta-sitosterol	Muscarinic acetylcholine receptor M3	CHRM3
	MOL000358	beta-sitosterol	Muscarinic acetylcholine receptor M1	CHRM1
	MOL000358	beta-sitosterol	Sodium channel protein type 5 subunit alpha	SCN5A
	MOL000358	beta-sitosterol	Gamma-aminobutyric-acid receptor alpha-2 subunit	GABRA2
	MOL000358	beta-sitosterol	Muscarinic acetylcholine receptor M4	CHRM4
	MOL000358	beta-sitosterol	CGMP-inhibited 3',5'-cyclic phosphodiesterase A	PDE3A
	MOL000358	beta-sitosterol	5-hydroxytryptamine 2A receptor	HTR2A
	MOL000358	beta-sitosterol	Gamma-aminobutyric-acid receptor alpha-5 subunit	GABRA5
	MOL000358	beta-sitosterol	Alpha-1A adrenergic receptor	ADRA1A
	MOL000358	beta-sitosterol	Gamma-aminobutyric-acid receptor alpha-3 subunit	GABRA3
	MOL000358	beta-sitosterol	Muscarinic acetylcholine receptor M2	CHRM2
	MOL000358	beta-sitosterol	Alpha-1B adrenergic receptor	ADRA1B
	MOL000358	beta-sitosterol	Beta-2 adrenergic receptor	ADRB2
	MOL000358	beta-sitosterol	Neuronal acetylcholine receptor subunit alpha-2	CHRNA2
	MOL000358	beta-sitosterol	Sodium-dependent serotonin transporter	SLC6A4
	MOL000358	beta-sitosterol	Mu-type opioid receptor	OPRM1
	MOL000358	beta-sitosterol	Gamma-aminobutyric acid receptor subunit alpha-1	GABRA1
	MOL000358	beta-sitosterol	Dipeptidyl peptidase IV	DPP4
	MOL000358	beta-sitosterol	Neuronal acetylcholine receptor protein, alpha-7 chain	CHRNA7
	MOL000358	beta-sitosterol	Cytochrome P450-cam	NOR51B_261
	MOL000358	beta-sitosterol	Acetylcholinesterase	ACHE
	MOL000359	sitosterol	Estrogen receptor	ESR1
	MOL000359	sitosterol	Androgen receptor	AR
	MOL000359	sitosterol	Progesterone receptor	PGR
	MOL000359	sitosterol	Glucocorticoid receptor	NR3C1
	MOL000359	sitosterol	Nuclear receptor coactivator 2	NCOA2
	MOL000359	sitosterol	Mineralocorticoid receptor	NR3C2
PCW	MOL000273	(2R)-2-[(3S,5R,10S,13R,14R,16R,17R)-3,16-dihydroxy-4,4,10,13,14-pentamethyl-2,3,5,6,12,15,16,17-octahydro-1H-cyclopenta[a]phenanthren-17-yl]-6-methylhept-5-enoic acid	Androgen receptor	AR
	MOL000273	(2R)-2-[(3S,5R,10S,13R,14R,16R,17R)-3,16-dihydroxy-4,4,10,13,14-pentamethyl-2,3,5,6,12,15,16,17-octahydro-1H-cyclopenta[a]phenanthren-17-yl]-6-methylhept-5-enoic acid	Mineralocorticoid receptor	NR3C2
	MOL000273	(2R)-2-[(3S,5R,10S,13R,14R,16R,17R)-3,16-dihydroxy-4,4,10,13,14-pentamethyl-2,3,5,6,12,15,16,17-octahydro-1H-cyclopenta[a]phenanthren-17-yl]-6-methylhept-5-enoic acid	Glucocorticoid receptor	NR3C1
	MOL000273	(2R)-2-[(3S,5R,10S,13R,14R,16R,17R)-3,16-dihydroxy-4,4,10,13,14-pentamethyl-2,3,5,6,12,15,16,17-octahydro-1H-cyclopenta[a]phenanthren-17-yl]-6-methylhept-5-enoic acid	Nuclear receptor coactivator 2	NCOA2
	MOL000275	trametenolic acid	Estrogen receptor	ESR1
	MOL000275	trametenolic acid	Androgen receptor	AR
	MOL000275	trametenolic acid	Mineralocorticoid receptor	NR3C2
	MOL000275	trametenolic acid	Glucocorticoid receptor	NR3C1
	MOL000276	7,9(11)-dehydropachymic acid	Glucocorticoid receptor	NR3C1
	MOL000279	Cerevisterol	Estrogen receptor	ESR1
	MOL000279	Cerevisterol	Androgen receptor	AR
	MOL000279	Cerevisterol	Glucocorticoid receptor	NR3C1
	MOL000279	Cerevisterol	Mineralocorticoid receptor	NR3C2
	MOL000280	(2R)-2-[(3S,5R,10S,13R,14R,16R,17R)-3,16-dihydroxy-4,4,10,13,14-pentamethyl-2,3,5,6,12,15,16,17-octahydro-1H-cyclopenta[a]phenanthren-17-yl]-5-isopropyl-hex-5-enoic acid	Androgen receptor	AR
	MOL000280	(2R)-2-[(3S,5R,10S,13R,14R,16R,17R)-3,16-dihydroxy-4,4,10,13,14-pentamethyl-2,3,5,6,12,15,16,17-octahydro-1H-cyclopenta[a]phenanthren-17-yl]-5-isopropyl-hex-5-enoic acid	Glucocorticoid receptor	NR3C1
	MOL000282	ergosta-7,22E-dien-3beta-ol	Estrogen receptor	ESR1
	MOL000282	ergosta-7,22E-dien-3beta-ol	Androgen receptor	AR
	MOL000282	ergosta-7,22E-dien-3beta-ol	Progesterone receptor	PGR
	MOL000282	ergosta-7,22E-dien-3beta-ol	Glucocorticoid receptor	NR3C1
	MOL000287	3beta-Hydroxy-24-methylene-8-lanostene-21-oic acid	Androgen receptor	AR
	MOL000287	3beta-Hydroxy-24-methylene-8-lanostene-21-oic acid	Glucocorticoid receptor	NR3C1
	MOL000289	pachymic acid	Glucocorticoid receptor	NR3C1
	MOL000290	Poricoic acid A	Androgen receptor	AR
	MOL000290	Poricoic acid A	Glucocorticoid receptor	NR3C1
	MOL000291	Poricoic acid B	Androgen receptor	AR
	MOL000291	Poricoic acid B	Glucocorticoid receptor	NR3C1
	MOL000292	poricoic acid C	Androgen receptor	AR
	MOL000296	hederagenin	Estrogen receptor	ESR1
	MOL000296	hederagenin	Androgen receptor	AR
	MOL000296	hederagenin	Progesterone receptor	PGR
	MOL000296	hederagenin	Glucocorticoid receptor	NR3C1
	MOL000296	hederagenin	Nuclear receptor coactivator 2	NCOA2
	MOL000296	hederagenin	Muscarinic acetylcholine receptor M3	CHRM3
	MOL000296	hederagenin	Thrombin	thrombin
	MOL000296	hederagenin	Muscarinic acetylcholine receptor M1	CHRM1
	MOL000296	hederagenin	Gamma-aminobutyric-acid receptor alpha-2 subunit	GABRA2
	MOL000296	hederagenin	Acetylcholinesterase	ACHE
	MOL000296	hederagenin	Gamma-aminobutyric-acid receptor alpha-3 subunit	GABRA3
	MOL000296	hederagenin	Muscarinic acetylcholine receptor M2	CHRM2
	MOL000296	hederagenin	Alpha-1B adrenergic receptor	ADRA1B
	MOL000296	hederagenin	Gamma-aminobutyric acid receptor subunit alpha-1	GABRA1
	MOL000296	hederagenin	Dipeptidyl peptidase IV	DPP4
	MOL000296	hederagenin	Glutamate receptor 2	GRIA2
	MOL000296	hederagenin	Gamma-aminobutyric-acid receptor subunit alpha-6	GABRA6
	MOL000296	hederagenin	Gamma-aminobutyric-acid receptor alpha-5 subunit	GABRA5
	MOL000296	hederagenin	Ig gamma-1 chain C region	IGHG1
	MOL000296	hederagenin	Trypsin-1	PRSS1
	MOL000296	hederagenin	Alcohol dehydrogenase 1B	ADH1B
	MOL000296	hederagenin	Alcohol dehydrogenase 1C	ADH1C
	MOL000296	hederagenin	Lysozyme	LYZ
	MOL000296	hederagenin	Nicotinate-nucleotide--dimethylbenzimidazole phosphoribosyltransferase	cobT
	MOL000296	hederagenin	Prostaglandin G/H synthase 1	PTGS1
	MOL000296	hederagenin	Sodium channel protein type 5 subunit alpha	SCN5A
	MOL000296	hederagenin	Prostaglandin G/H synthase 2	PTGS2
	MOL000296	hederagenin	Retinoic acid receptor RXR-alpha	RXRA
	MOL000296	hederagenin	CGMP-inhibited 3',5'-cyclic phosphodiesterase A	PDE3A
	MOL000296	hederagenin	Sodium-dependent noradrenaline transporter	SLC6A2
	MOL000296	hederagenin	Peroxisome proliferator activated receptor gamma	PPARG
	MOL000296	hederagenin	Nitric-oxide synthase, endothelial	NOS3
	MOL000296	hederagenin	Cytochrome P450-cam	NOR51B_261
	MOL000296	hederagenin	Carbonic anhydrase II	CA2
OS	MOL000098	quercetin	Nitric oxide synthase, inducible	NOS2
	MOL000098	quercetin	Prostaglandin G/H synthase 1	PTGS1
	MOL000098	quercetin	Estrogen receptor	ESR1
	MOL000098	quercetin	Androgen receptor	AR
	MOL000098	quercetin	Peroxisome proliferator activated receptor gamma	PPARG
	MOL000098	quercetin	Prostaglandin G/H synthase 2	PTGS2
	MOL000098	quercetin	Carbonic anhydrase II	CA2
	MOL000098	quercetin	mRNA of Protein-tyrosine phosphatase, non-receptor type 1	PTPN1
	MOL000098	quercetin	Estrogen receptor beta	ESR2
	MOL000098	quercetin	Mitogen-activated protein kinase 14	MAPK14
	MOL000098	quercetin	Glycogen synthase kinase-3 beta	GSK3B
	MOL000098	quercetin	Heat shock protein HSP 90	HSP90A
	MOL000098	quercetin	Cell division protein kinase 2	CDK2
	MOL000098	quercetin	Phosphatidylinositol-4,5-bisphosphate 3-kinase catalytic subunit, gamma isoform	PIK3CA
	MOL000098	quercetin	Beta-lactamase	blaC
	MOL000098	quercetin	Proto-oncogene serine/threonine-protein kinase Pim-1	PIM1
	MOL000098	quercetin	Cyclin-A2	CCNA2
	MOL000098	quercetin	Nuclear receptor coactivator 2	NCOA2
	MOL000098	quercetin	Dipeptidyl peptidase IV	DPP4
	MOL000098	quercetin	Aldose reductase	AKR1B1
	MOL000098	quercetin	Trypsin-1	PRSS1
	MOL000098	quercetin	Serine/threonine-protein kinase Chk1	CHEK1
	MOL000098	quercetin	DNA topoisomerase II	TOP2
	MOL000098	quercetin	Thrombin	thrombin
	MOL000098	quercetin	Potassium voltage-gated channel subfamily H member 2	KCNH2
	MOL000098	quercetin	Sodium channel protein type 5 subunit alpha	SCN5A
	MOL000098	quercetin	Coagulation factor Xa	F10
	MOL000098	quercetin	Beta-2 adrenergic receptor	ADRB2
	MOL000098	quercetin	Stromelysin-1	MMP3
	MOL000098	quercetin	mRNA of PKA Catalytic Subunit C-alpha	PRKACA
	MOL000098	quercetin	Coagulation factor VII	F8
	MOL000098	quercetin	Nitric-oxide synthase, endothelial	NOS3
	MOL000098	quercetin	Retinoic acid receptor RXR-alpha	RXRA
	MOL000098	quercetin	Acetylcholinesterase	ACHE
	MOL000098	quercetin	Gamma-aminobutyric acid receptor subunit alpha-1	GABRA1
	MOL000098	quercetin	Amine oxidase [flavin-containing] B	MAOB
	MOL000173	wogonin	Nitric oxide synthase, inducible	NOS2
	MOL000173	wogonin	Prostaglandin G/H synthase 1	PTGS1
	MOL000173	wogonin	Estrogen receptor	ESR1
	MOL000173	wogonin	Androgen receptor	AR
	MOL000173	wogonin	Sodium channel protein type 5 subunit alpha	SCN5A
	MOL000173	wogonin	Peroxisome proliferator activated receptor gamma	PPARG
	MOL000173	wogonin	Prostaglandin G/H synthase 2	PTGS2
	MOL000173	wogonin	Retinoic acid receptor RXR-alpha	RXRA
	MOL000173	wogonin	CGMP-inhibited 3',5'-cyclic phosphodiesterase A	PDE3A
	MOL000173	wogonin	mRNA of Protein-tyrosine phosphatase, non-receptor type 1	PTPN1
	MOL000173	wogonin	Estrogen receptor beta	ESR2
	MOL000173	wogonin	Dipeptidyl peptidase IV	DPP4
	MOL000173	wogonin	Mitogen-activated protein kinase 14	MAPK14
	MOL000173	wogonin	Glycogen synthase kinase-3 beta	GSK3B
	MOL000173	wogonin	Heat shock protein HSP 90	HSP90A
	MOL000173	wogonin	Cell division protein kinase 2	CDK2
	MOL000173	wogonin	Phosphatidylinositol-4,5-bisphosphate 3-kinase catalytic subunit, gamma isoform	PIK3CA
	MOL000173	wogonin	Serine/threonine-protein kinase Chk1	CHEK1
	MOL000173	wogonin	mRNA of PKA Catalytic Subunit C-alpha	PRKACA
	MOL000173	wogonin	Proto-oncogene serine/threonine-protein kinase Pim-1	PIM1
	MOL000173	wogonin	Cyclin-A2	CCNA2
	MOL000173	wogonin	Carbonic anhydrase II	CA2
	MOL000173	wogonin	Beta-lactamase	blaC
	MOL000173	wogonin	Trypsin-1	PRSS1
	MOL000173	wogonin	Calmodulin	CALM
	MOL000173	wogonin	Beta-2 adrenergic receptor	ADRB2
	MOL000173	wogonin	Gamma-aminobutyric acid receptor subunit alpha-1	GABRA1
	MOL000358	beta-sitosterol	Estrogen receptor	ESR1
	MOL000358	beta-sitosterol	Androgen receptor	AR
	MOL000358	beta-sitosterol	Progesterone receptor	PGR
	MOL000358	beta-sitosterol	Glucocorticoid receptor	NR3C1
	MOL000358	beta-sitosterol	Nuclear receptor coactivator 2	NCOA2
	MOL000358	beta-sitosterol	Nitric oxide synthase, inducible	NOS2
	MOL000358	beta-sitosterol	Prostaglandin G/H synthase 1	PTGS1
	MOL000358	beta-sitosterol	Peroxisome proliferator activated receptor gamma	PPARG
	MOL000358	beta-sitosterol	Prostaglandin G/H synthase 2	PTGS2
	MOL000358	beta-sitosterol	Carbonic anhydrase II	CA2
	MOL000358	beta-sitosterol	mRNA of Protein-tyrosine phosphatase, non-receptor type 1	PTPN1
	MOL000358	beta-sitosterol	Estrogen receptor beta	ESR2
	MOL000358	beta-sitosterol	Mitogen-activated protein kinase 14	MAPK14
	MOL000358	beta-sitosterol	Glycogen synthase kinase-3 beta	GSK3B
	MOL000358	beta-sitosterol	Heat shock protein HSP 90	HSP90A
	MOL000358	beta-sitosterol	Cell division protein kinase 2	CDK2
	MOL000358	beta-sitosterol	Phosphatidylinositol-4,5-bisphosphate 3-kinase catalytic subunit, gamma isoform	PIK3CA
	MOL000358	beta-sitosterol	Beta-lactamase	blaC
	MOL000358	beta-sitosterol	Proto-oncogene serine/threonine-protein kinase Pim-1	PIM1
	MOL000358	beta-sitosterol	Cyclin-A2	CCNA2
	MOL000358	beta-sitosterol	Thrombin	thrombin
	MOL000358	beta-sitosterol	Potassium voltage-gated channel subfamily H member 2	KCNH2
	MOL000358	beta-sitosterol	Serine/threonine-protein kinase Chk1	CHEK1
	MOL000358	beta-sitosterol	mRNA of PKA Catalytic Subunit C-alpha	PRKACA
	MOL000358	beta-sitosterol	Trypsin-1	PRSS1
	MOL000358	beta-sitosterol	Dopamine D1 receptor	DRD1
	MOL000358	beta-sitosterol	Muscarinic acetylcholine receptor M3	CHRM3
	MOL000358	beta-sitosterol	Muscarinic acetylcholine receptor M1	CHRM1
	MOL000358	beta-sitosterol	Sodium channel protein type 5 subunit alpha	SCN5A
	MOL000358	beta-sitosterol	Gamma-aminobutyric-acid receptor alpha-2 subunit	GABRA2
	MOL000358	beta-sitosterol	Muscarinic acetylcholine receptor M4	CHRM4
	MOL000358	beta-sitosterol	CGMP-inhibited 3',5'-cyclic phosphodiesterase A	PDE3A
	MOL000358	beta-sitosterol	5-hydroxytryptamine 2A receptor	HTR2A
	MOL000358	beta-sitosterol	Gamma-aminobutyric-acid receptor alpha-5 subunit	GABRA5
	MOL000358	beta-sitosterol	Alpha-1A adrenergic receptor	ADRA1A
	MOL000358	beta-sitosterol	Gamma-aminobutyric-acid receptor alpha-3 subunit	GABRA3
	MOL000358	beta-sitosterol	Muscarinic acetylcholine receptor M2	CHRM2
	MOL000358	beta-sitosterol	Alpha-1B adrenergic receptor	ADRA1B
	MOL000358	beta-sitosterol	Beta-2 adrenergic receptor	ADRB2
	MOL000358	beta-sitosterol	Neuronal acetylcholine receptor subunit alpha-2	CHRNA2
	MOL000358	beta-sitosterol	Sodium-dependent serotonin transporter	SLC6A4
	MOL000358	beta-sitosterol	Mu-type opioid receptor	OPRM1
	MOL000358	beta-sitosterol	Gamma-aminobutyric acid receptor subunit alpha-1	GABRA1
	MOL000358	beta-sitosterol	Dipeptidyl peptidase IV	DPP4
	MOL000358	beta-sitosterol	Neuronal acetylcholine receptor protein, alpha-7 chain	CHRNA7
	MOL000358	beta-sitosterol	Cytochrome P450-cam	NOR51B_261
	MOL000358	beta-sitosterol	Acetylcholinesterase	ACHE
	MOL000449	Stigmasterol	Estrogen receptor	ESR1
	MOL000449	Stigmasterol	Androgen receptor	AR
	MOL000449	Stigmasterol	Progesterone receptor	PGR
	MOL000449	Stigmasterol	Mineralocorticoid receptor	NR3C2
	MOL000449	Stigmasterol	Glucocorticoid receptor	NR3C1
	MOL000449	Stigmasterol	Nuclear receptor coactivator 2	NCOA2
	MOL000449	Stigmasterol	Thrombin	thrombin
	MOL000449	Stigmasterol	Nitric-oxide synthase, endothelial	NOS3
	MOL000449	Stigmasterol	Acetylcholinesterase	ACHE
	MOL000449	Stigmasterol	Alcohol dehydrogenase 1C	ADH1C
	MOL000449	Stigmasterol	Ig gamma-1 chain C region	IGHG1
	MOL000449	Stigmasterol	Trypsin-1	PRSS1
	MOL000449	Stigmasterol	Nitric oxide synthase, inducible	NOS2
	MOL000449	Stigmasterol	Retinoic acid receptor RXR-alpha	RXRA
	MOL000449	Stigmasterol	Nuclear receptor coactivator 1	NCOA1
	MOL000449	Stigmasterol	Prostaglandin G/H synthase 1	PTGS1
	MOL000449	Stigmasterol	Peroxisome proliferator activated receptor gamma	PPARG
	MOL000449	Stigmasterol	Prostaglandin G/H synthase 2	PTGS2
	MOL000449	Stigmasterol	Alpha-2A adrenergic receptor	ADRA2A
	MOL000449	Stigmasterol	Carbonic anhydrase II	CA2
	MOL000449	Stigmasterol	Sodium-dependent noradrenaline transporter	SLC6A2
	MOL000449	Stigmasterol	Sodium-dependent dopamine transporter	SLC6A3
	MOL000449	Stigmasterol	Beta-2 adrenergic receptor	ADRB2
	MOL000449	Stigmasterol	Aldose reductase	AKR1B1
	MOL000449	Stigmasterol	Dipeptidyl peptidase IV	DPP4
	MOL000449	Stigmasterol	Urokinase-type plasminogen activator	PLAU
	MOL000449	Stigmasterol	Cell division protein kinase 2	CDK2
	MOL000449	Stigmasterol	Beta-lactamase	blaC
	MOL000449	Stigmasterol	Leukotriene A-4 hydrolase	LTA4H
	MOL000449	Stigmasterol	Amine oxidase [flavin-containing] B	MAOB
	MOL000449	Stigmasterol	Amine oxidase [flavin-containing] A	MAOA
	MOL000449	Stigmasterol	mRNA of PKA Catalytic Subunit C-alpha	PRKACA
	MOL000449	Stigmasterol	Chymotrypsinogen B	CTRB1
	MOL000449	Stigmasterol	Muscarinic acetylcholine receptor M3	CHRM3
	MOL000449	Stigmasterol	Muscarinic acetylcholine receptor M1	CHRM1
	MOL000449	Stigmasterol	Beta-1 adrenergic receptor	ADRB1
	MOL000449	Stigmasterol	Sodium channel protein type 5 subunit alpha	SCN5A
	MOL000449	Stigmasterol	5-hydroxytryptamine 2A receptor	HTR2A
	MOL000449	Stigmasterol	Alpha-1A adrenergic receptor	ADRA1A
	MOL000449	Stigmasterol	Gamma-aminobutyric-acid receptor alpha-3 subunit	GABRA3
	MOL000449	Stigmasterol	Muscarinic acetylcholine receptor M2	CHRM2
	MOL000449	Stigmasterol	Alpha-1B adrenergic receptor	ADRA1B
	MOL000449	Stigmasterol	Gamma-aminobutyric acid receptor subunit alpha-1	GABRA1
	MOL000449	Stigmasterol	Neuronal acetylcholine receptor protein, alpha-7 chain	CHRNA7
	MOL000471	aloe-emodin	Nitric oxide synthase, inducible	NOS2
	MOL000471	aloe-emodin	Prostaglandin G/H synthase 1	PTGS1
	MOL000471	aloe-emodin	Estrogen receptor	ESR1
	MOL000471	aloe-emodin	Androgen receptor	AR
	MOL000471	aloe-emodin	Peroxisome proliferator activated receptor gamma	PPARG
	MOL000471	aloe-emodin	Prostaglandin G/H synthase 2	PTGS2
	MOL000471	aloe-emodin	Nitric-oxide synthase, endothelial	NOS3
	MOL000471	aloe-emodin	Carbonic anhydrase II	CA2
	MOL000471	aloe-emodin	Acetylcholinesterase	ACHE
	MOL000471	aloe-emodin	mRNA of Protein-tyrosine phosphatase, non-receptor type 1	PTPN1
	MOL000471	aloe-emodin	Estrogen receptor beta	ESR2
	MOL000471	aloe-emodin	Dipeptidyl peptidase IV	DPP4
	MOL000471	aloe-emodin	Mitogen-activated protein kinase 14	MAPK14
	MOL000471	aloe-emodin	Glycogen synthase kinase-3 beta	GSK3B
	MOL000471	aloe-emodin	Heat shock protein HSP 90	HSP90A
	MOL000471	aloe-emodin	Cell division protein kinase 2	CDK2
	MOL000471	aloe-emodin	Phosphatidylinositol-4,5-bisphosphate 3-kinase catalytic subunit, gamma isoform	PIK3CA
	MOL000471	aloe-emodin	Beta-lactamase	blaC
	MOL000471	aloe-emodin	Serine/threonine-protein kinase Chk1	CHEK1
	MOL000471	aloe-emodin	mRNA of PKA Catalytic Subunit C-alpha	PRKACA
	MOL000471	aloe-emodin	Proto-oncogene serine/threonine-protein kinase Pim-1	PIM1
	MOL000471	aloe-emodin	Cyclin-A2	CCNA2
	MOL000471	aloe-emodin	Nuclear receptor coactivator 2	NCOA2
	MOL000471	aloe-emodin	cAMP-dependent protein kinase inhibitor alpha	PKIA
	MOL000471	aloe-emodin	Aldose reductase	AKR1B1
	MOL000471	aloe-emodin	Ig gamma-1 chain C region	IGHG1
	MOL000471	aloe-emodin	Trypsin-1	PRSS1
	MOL001735	Dinatin	Nitric oxide synthase, inducible	NOS2
	MOL001735	Dinatin	Prostaglandin G/H synthase 1	PTGS1
	MOL001735	Dinatin	Estrogen receptor	ESR1
	MOL001735	Dinatin	Androgen receptor	AR
	MOL001735	Dinatin	Peroxisome proliferator activated receptor gamma	PPARG
	MOL001735	Dinatin	Prostaglandin G/H synthase 2	PTGS2
	MOL001735	Dinatin	Carbonic anhydrase II	CA2
	MOL001735	Dinatin	mRNA of Protein-tyrosine phosphatase, non-receptor type 1	PTPN1
	MOL001735	Dinatin	Estrogen receptor beta	ESR2
	MOL001735	Dinatin	Dipeptidyl peptidase IV	DPP4
	MOL001735	Dinatin	Mitogen-activated protein kinase 14	MAPK14
	MOL001735	Dinatin	Glycogen synthase kinase-3 beta	GSK3B
	MOL001735	Dinatin	Heat shock protein HSP 90	HSP90A
	MOL001735	Dinatin	Cell division protein kinase 2	CDK2
	MOL001735	Dinatin	Phosphatidylinositol-4,5-bisphosphate 3-kinase catalytic subunit, gamma isoform	PIK3CA
	MOL001735	Dinatin	Beta-lactamase	blaC
	MOL001735	Dinatin	Serine/threonine-protein kinase Chk1	CHEK1
	MOL001735	Dinatin	mRNA of PKA Catalytic Subunit C-alpha	PRKACA
	MOL001735	Dinatin	Trypsin-1	PRSS1
	MOL001735	Dinatin	Proto-oncogene serine/threonine-protein kinase Pim-1	PIM1
	MOL001735	Dinatin	Cyclin-A2	CCNA2
	MOL001735	Dinatin	Nuclear receptor coactivator 2	NCOA2
	MOL001735	Dinatin	Nuclear receptor coactivator 1	NCOA1
	MOL001735	Dinatin	Calmodulin	CALM
	MOL001735	Dinatin	Thrombin	thrombin
	MOL001735	Dinatin	Nitric-oxide synthase, endothelial	NOS3
	MOL001735	Dinatin	Acetylcholinesterase	ACHE
	MOL001735	Dinatin	Rhodopsin	RHO
	MOL001735	Dinatin	Ig gamma-1 chain C region	IGHG1
	MOL001735	Dinatin	Ferrichrome-iron receptor	fhuA
EHH	MOL000006	luteolin	Nitric oxide synthase, inducible	NOS2
	MOL000006	luteolin	Prostaglandin G/H synthase 1	PTGS1
	MOL000006	luteolin	Estrogen receptor	ESR1
	MOL000006	luteolin	Androgen receptor	AR
	MOL000006	luteolin	Peroxisome proliferator activated receptor gamma	PPARG
	MOL000006	luteolin	Prostaglandin G/H synthase 2	PTGS2
	MOL000006	luteolin	Carbonic anhydrase II	CA2
	MOL000006	luteolin	mRNA of Protein-tyrosine phosphatase, non-receptor type 1	PTPN1
	MOL000006	luteolin	Estrogen receptor beta	ESR2
	MOL000006	luteolin	Mitogen-activated protein kinase 14	MAPK14
	MOL000006	luteolin	Heat shock protein HSP 90	HSP90A
	MOL000006	luteolin	Cell division protein kinase 2	CDK2
	MOL000006	luteolin	Trypsin-1	PRSS1
	MOL000006	luteolin	Proto-oncogene serine/threonine-protein kinase Pim-1	PIM1
	MOL000006	luteolin	Cyclin-A2	CCNA2
	MOL000006	luteolin	Nuclear receptor coactivator 2	NCOA2
	MOL000006	luteolin	Glycogen synthase kinase-3 beta	GSK3B
	MOL000006	luteolin	mRNA of PKA Catalytic Subunit C-alpha	PRKACA
	MOL000006	luteolin	Dipeptidyl peptidase IV	DPP4
	MOL000006	luteolin	Phosphatidylinositol-4,5-bisphosphate 3-kinase catalytic subunit, gamma isoform	PIK3CA
	MOL000098	quercetin	Nitric oxide synthase, inducible	NOS2
	MOL000098	quercetin	Prostaglandin G/H synthase 1	PTGS1
	MOL000098	quercetin	Estrogen receptor	ESR1
	MOL000098	quercetin	Androgen receptor	AR
	MOL000098	quercetin	Peroxisome proliferator activated receptor gamma	PPARG
	MOL000098	quercetin	Prostaglandin G/H synthase 2	PTGS2
	MOL000098	quercetin	Carbonic anhydrase II	CA2
	MOL000098	quercetin	mRNA of Protein-tyrosine phosphatase, non-receptor type 1	PTPN1
	MOL000098	quercetin	Estrogen receptor beta	ESR2
	MOL000098	quercetin	Mitogen-activated protein kinase 14	MAPK14
	MOL000098	quercetin	Glycogen synthase kinase-3 beta	GSK3B
	MOL000098	quercetin	Heat shock protein HSP 90	HSP90A
	MOL000098	quercetin	Cell division protein kinase 2	CDK2
	MOL000098	quercetin	Phosphatidylinositol-4,5-bisphosphate 3-kinase catalytic subunit, gamma isoform	PIK3CA
	MOL000098	quercetin	Beta-lactamase	blaC
	MOL000098	quercetin	Proto-oncogene serine/threonine-protein kinase Pim-1	PIM1
	MOL000098	quercetin	Cyclin-A2	CCNA2
	MOL000098	quercetin	Nuclear receptor coactivator 2	NCOA2
	MOL000098	quercetin	Dipeptidyl peptidase IV	DPP4
	MOL000098	quercetin	Aldose reductase	AKR1B1
	MOL000098	quercetin	Trypsin-1	PRSS1
	MOL000098	quercetin	Serine/threonine-protein kinase Chk1	CHEK1
	MOL000098	quercetin	DNA topoisomerase II	TOP2
	MOL000098	quercetin	Thrombin	thrombin
	MOL000098	quercetin	Potassium voltage-gated channel subfamily H member 2	KCNH2
	MOL000098	quercetin	Sodium channel protein type 5 subunit alpha	SCN5A
	MOL000098	quercetin	Coagulation factor Xa	F10
	MOL000098	quercetin	Beta-2 adrenergic receptor	ADRB2
	MOL000098	quercetin	Stromelysin-1	MMP3
	MOL000098	quercetin	mRNA of PKA Catalytic Subunit C-alpha	PRKACA
	MOL000098	quercetin	Coagulation factor VII	F8
	MOL000098	quercetin	Nitric-oxide synthase, endothelial	NOS3
	MOL000098	quercetin	Retinoic acid receptor RXR-alpha	RXRA
	MOL000098	quercetin	Acetylcholinesterase	ACHE
	MOL000098	quercetin	Gamma-aminobutyric acid receptor subunit alpha-1	GABRA1
	MOL000098	quercetin	Amine oxidase [flavin-containing] B	MAOB
	MOL000358	beta-sitosterol	Estrogen receptor	ESR1
	MOL000358	beta-sitosterol	Androgen receptor	AR
	MOL000358	beta-sitosterol	Progesterone receptor	PGR
	MOL000358	beta-sitosterol	Glucocorticoid receptor	NR3C1
	MOL000358	beta-sitosterol	Nuclear receptor coactivator 2	NCOA2
	MOL000358	beta-sitosterol	Nitric oxide synthase, inducible	NOS2
	MOL000358	beta-sitosterol	Prostaglandin G/H synthase 1	PTGS1
	MOL000358	beta-sitosterol	Peroxisome proliferator activated receptor gamma	PPARG
	MOL000358	beta-sitosterol	Prostaglandin G/H synthase 2	PTGS2
	MOL000358	beta-sitosterol	Carbonic anhydrase II	CA2
	MOL000358	beta-sitosterol	mRNA of Protein-tyrosine phosphatase, non-receptor type 1	PTPN1
	MOL000358	beta-sitosterol	Estrogen receptor beta	ESR2
	MOL000358	beta-sitosterol	Mitogen-activated protein kinase 14	MAPK14
	MOL000358	beta-sitosterol	Glycogen synthase kinase-3 beta	GSK3B
	MOL000358	beta-sitosterol	Heat shock protein HSP 90	HSP90A
	MOL000358	beta-sitosterol	Cell division protein kinase 2	CDK2
	MOL000358	beta-sitosterol	Phosphatidylinositol-4,5-bisphosphate 3-kinase catalytic subunit, gamma isoform	PIK3CA
	MOL000358	beta-sitosterol	Beta-lactamase	blaC
	MOL000358	beta-sitosterol	Proto-oncogene serine/threonine-protein kinase Pim-1	PIM1
	MOL000358	beta-sitosterol	Cyclin-A2	CCNA2
	MOL000358	beta-sitosterol	Thrombin	thrombin
	MOL000358	beta-sitosterol	Potassium voltage-gated channel subfamily H member 2	KCNH2
	MOL000358	beta-sitosterol	Serine/threonine-protein kinase Chk1	CHEK1
	MOL000358	beta-sitosterol	mRNA of PKA Catalytic Subunit C-alpha	PRKACA
	MOL000358	beta-sitosterol	Trypsin-1	PRSS1
	MOL000358	beta-sitosterol	Dopamine D1 receptor	DRD1
	MOL000358	beta-sitosterol	Muscarinic acetylcholine receptor M3	CHRM3
	MOL000358	beta-sitosterol	Muscarinic acetylcholine receptor M1	CHRM1
	MOL000358	beta-sitosterol	Sodium channel protein type 5 subunit alpha	SCN5A
	MOL000358	beta-sitosterol	Gamma-aminobutyric-acid receptor alpha-2 subunit	GABRA2
	MOL000358	beta-sitosterol	Muscarinic acetylcholine receptor M4	CHRM4
	MOL000358	beta-sitosterol	CGMP-inhibited 3',5'-cyclic phosphodiesterase A	PDE3A
	MOL000358	beta-sitosterol	5-hydroxytryptamine 2A receptor	HTR2A
	MOL000358	beta-sitosterol	Gamma-aminobutyric-acid receptor alpha-5 subunit	GABRA5
	MOL000358	beta-sitosterol	Alpha-1A adrenergic receptor	ADRA1A
	MOL000358	beta-sitosterol	Gamma-aminobutyric-acid receptor alpha-3 subunit	GABRA3
	MOL000358	beta-sitosterol	Muscarinic acetylcholine receptor M2	CHRM2
	MOL000358	beta-sitosterol	Alpha-1B adrenergic receptor	ADRA1B
	MOL000358	beta-sitosterol	Beta-2 adrenergic receptor	ADRB2
	MOL000358	beta-sitosterol	Neuronal acetylcholine receptor subunit alpha-2	CHRNA2
	MOL000358	beta-sitosterol	Sodium-dependent serotonin transporter	SLC6A4
	MOL000358	beta-sitosterol	Mu-type opioid receptor	OPRM1
	MOL000358	beta-sitosterol	Gamma-aminobutyric acid receptor subunit alpha-1	GABRA1
	MOL000358	beta-sitosterol	Dipeptidyl peptidase IV	DPP4
	MOL000358	beta-sitosterol	Neuronal acetylcholine receptor protein, alpha-7 chain	CHRNA7
	MOL000358	beta-sitosterol	Cytochrome P450-cam	NOR51B_261
	MOL000358	beta-sitosterol	Acetylcholinesterase	ACHE
	MOL000422	kaempferol	Nitric oxide synthase, inducible	NOS2
	MOL000422	kaempferol	Prostaglandin G/H synthase 1	PTGS1
	MOL000422	kaempferol	Estrogen receptor	ESR1
	MOL000422	kaempferol	Androgen receptor	AR
	MOL000422	kaempferol	Peroxisome proliferator activated receptor gamma	PPARG
	MOL000422	kaempferol	Prostaglandin G/H synthase 2	PTGS2
	MOL000422	kaempferol	Carbonic anhydrase II	CA2
	MOL000422	kaempferol	mRNA of Protein-tyrosine phosphatase, non-receptor type 1	PTPN1
	MOL000422	kaempferol	Estrogen receptor beta	ESR2
	MOL000422	kaempferol	Mitogen-activated protein kinase 14	MAPK14
	MOL000422	kaempferol	Glycogen synthase kinase-3 beta	GSK3B
	MOL000422	kaempferol	Heat shock protein HSP 90	HSP90A
	MOL000422	kaempferol	Cell division protein kinase 2	CDK2
	MOL000422	kaempferol	Phosphatidylinositol-4,5-bisphosphate 3-kinase catalytic subunit, gamma isoform	PIK3CA
	MOL000422	kaempferol	mRNA of PKA Catalytic Subunit C-alpha	PRKACA
	MOL000422	kaempferol	Proto-oncogene serine/threonine-protein kinase Pim-1	PIM1
	MOL000422	kaempferol	Nuclear receptor coactivator 2	NCOA2
	MOL000422	kaempferol	Cyclin-A2	CCNA2
	MOL000422	kaempferol	Dipeptidyl peptidase IV	DPP4
	MOL000422	kaempferol	Beta-lactamase	blaC
	MOL000422	kaempferol	Serine/threonine-protein kinase Chk1	CHEK1
	MOL000422	kaempferol	Trypsin-1	PRSS1
	MOL000422	kaempferol	Progesterone receptor	PGR
	MOL000422	kaempferol	Thrombin	thrombin
	MOL000422	kaempferol	Muscarinic acetylcholine receptor M1	CHRM1
	MOL000422	kaempferol	Nitric-oxide synthase, endothelial	NOS3
	MOL000422	kaempferol	Gamma-aminobutyric-acid receptor alpha-2 subunit	GABRA2
	MOL000422	kaempferol	Acetylcholinesterase	ACHE
	MOL000422	kaempferol	Sodium-dependent noradrenaline transporter	SLC6A2
	MOL000422	kaempferol	Muscarinic acetylcholine receptor M2	CHRM2
	MOL000422	kaempferol	Alpha-1B adrenergic receptor	ADRA1B
	MOL000422	kaempferol	Gamma-aminobutyric acid receptor subunit alpha-1	GABRA1
	MOL000422	kaempferol	DNA topoisomerase II	TOP2
	MOL000422	kaempferol	Coagulation factor VII	F8
	MOL000422	kaempferol	Calmodulin	CALM
	MOL001771	poriferast-5-en-3beta-ol	Estrogen receptor	ESR1
	MOL001771	poriferast-5-en-4beta-ol	Androgen receptor	AR
	MOL001771	poriferast-5-en-5beta-ol	Progesterone receptor	PGR
	MOL001771	poriferast-5-en-6beta-ol	Nuclear receptor coactivator 2	NCOA2
	MOL001771	poriferast-5-en-7beta-ol	Glucocorticoid receptor	NR3C1
