# Supplementary material for: Relieving Sore Throat Formula Exerts a Therapeutic Effect on Pharyngitis through Immunoregulation and NF-κB Pathway
Source: Mediators Inflamm. 2020 May 15;2020:2929163. doi: 10.1155/2020/2929163 (PMC7245656; doi:10.1155/2020/2929163)
Supplement: Supplementary 5 — Supplementary Table 4. Information of known pharyngitis-related targets. [file 2929163.f5.xlsx]

## Sheet: GSE34205
Probe Set ID	Gene Symbol	Accession Number	Gene Description	Mean Signal of Group pharyngitis	Mean Signal of Group control	t statistic	Fold Change	p-value	q-value	Gene Feature	Biotype	Rank
202411_at	IFI27	NM_001130080	interferon, alpha-inducible protein 27	10.8384	5.73582	12.1855	34.3576	0	0	up	coding	1
231688_at	MMP8	NM_002424	matrix metallopeptidase 8 (neutrophil collagenase)	7.37445	4.83505	9.53487	5.81345	0	0	up	coding	2
206676_at	CEACAM8	NM_001816	carcinoembryonic antigen-related cell adhesion molecule 8	7.55236	5.03448	7.99252	5.7274	0	0	up	coding	3
202018_s_at	LTF	NM_001199149	lactotransferrin	9.47662	6.98206	8.58389	5.63558	0	0	up	coding	4
212768_s_at	OLFM4	NM_006418	olfactomedin 4	6.70845	4.25046	7.49408	5.49453	0	0	up	coding	5
206834_at	HBD	NM_000519	hemoglobin, delta	9.73576	7.48931	7.66641	4.74514	0	0	up	coding	6
240336_at	HBM	NM_001003938	hemoglobin, mu	9.64644	7.47472	7.30216	4.50559	0	0	up	coding	7
207269_at	DEFA4	NM_001925	defensin, alpha 4, corticostatin	8.5898	6.45946	7.77069	4.37817	0	0	up	coding	8
209369_at	ANXA3	NM_005139	annexin A3	7.14703	5.06285	7.06988	4.24033	0	0	up	coding	9
211734_s_at	FCER1A	NM_002001	Fc fragment of IgE, high affinity I, receptor for; alpha polypeptide	7.31479	9.39284	-9.60718	-4.22236	0	0	down	coding	10
207329_at	MMP8	NM_002424	matrix metallopeptidase 8 (neutrophil collagenase)	7.23966	5.41033	8.15887	3.55372	0	0	up	coding	11
206111_at	RNASE2	NM_002934	ribonuclease, RNase A family, 2 (liver, eosinophil-derived neurotoxin)	10.391	8.56926	8.11958	3.53515	0	0	up	coding	12
219672_at	AHSP	NM_016633	alpha hemoglobin stabilizing protein	8.10405	6.40902	7.10976	3.23784	0	0	up	coding	13
206177_s_at	ARG1	NM_000045	arginase, liver	7.6842	6.01344	7.43451	3.18383	0	0	up	coding	14
203948_s_at	MPO	NM_000250	myeloperoxidase	7.42415	5.83774	7.06413	3.00301	0	0	up	coding	15
212531_at	LCN2	NM_005564	lipocalin 2	8.97903	7.4325	7.32472	2.92114	0	0	up	coding	16
210244_at	CAMP	NM_004345	cathelicidin antimicrobial peptide	8.61848	7.07699	7.21907	2.91094	0	0	up	coding	17
206697_s_at	HP	NM_001126102	haptoglobin	8.09925	6.60006	7.9904	2.82685	0	0	up	coding	18
208886_at	H1F0	NM_005318	H1 histone family, member 0	9.80208	8.30679	8.38022	2.81922	0	0	up	coding	19
208470_s_at	HP	NM_001126102	haptoglobin	7.67802	6.26821	7.84569	2.65703	0	0	up	coding	20
205557_at	BPI	NM_001725	bactericidal/permeability-increasing protein	8.32037	6.94129	6.84314	2.60103	0	0	up	coding	21
241981_at	FAM20A	NM_001243746	family with sequence similarity 20, member A	5.62997	4.25235	9.29005	2.59839	0	0	up	coding	22
203949_at	MPO	NM_000250	myeloperoxidase	7.72917	6.37954	6.78655	2.54846	0	0	up	coding	23
44673_at	SIGLEC1	NM_023068	sialic acid binding Ig-like lectin 1, sialoadhesin	8.56868	7.27646	7.47816	2.44906	0	0	up	coding	24
209398_at	HIST1H1C	NM_005319	histone cluster 1, H1c	9.64877	8.36632	9.48788	2.43252	0	0	up	coding	25
204187_at	GMPR	NM_006877	guanosine monophosphate reductase	7.94654	6.66981	7.50088	2.42289	0	0	up	coding	26
218280_x_at	HIST2H2AA3	NM_001040874	histone cluster 2, H2aa3	10.994	9.74965	9.17252	2.36918	0	0	up	coding	27
214290_s_at	HIST2H2AA3	NM_001040874	histone cluster 2, H2aa3	12.0825	10.946	9.28348	2.19849	0	0	up	coding	28
206851_at	RNASE3	NM_002935	ribonuclease, RNase A family, 3	7.67036	6.53452	7.55071	2.19746	0	0	up	coding	29
202468_s_at	CTNNAL1	NM_003798	catenin (cadherin-associated protein), alpha-like 1	7.17489	6.15083	8.2175	2.03363	0	0	up	coding	30
210395_x_at	MYL4	NM_001002841	myosin, light chain 4, alkali; atrial, embryonic	7.31353	6.41011	7.06358	1.87049	0	0	up	coding	31
218660_at	DYSF	NM_001130455	dysferlin, limb girdle muscular dystrophy 2B (autosomal recessive)	9.30309	8.40317	7.39319	1.86596	0	0	up	coding	32
210088_x_at	MYL4	NM_001002841	myosin, light chain 4, alkali; atrial, embryonic	7.3246	6.47569	6.94637	1.80114	0	0	up	coding	33
216054_x_at	MYL4	NM_001002841	myosin, light chain 4, alkali; atrial, embryonic	6.8287	6.03193	6.81294	1.73721	0	0	up	coding	34
223767_at	GPR84	NM_020370	G protein-coupled receptor 84	6.67074	5.87888	6.88683	1.73131	0	0	up	coding	35
220492_s_at	OTOF	NM_004802	otoferlin	6.56434	5.79081	7.32688	1.70945	0	0	up	coding	36
211937_at	EIF4B	NM_001417	eukaryotic translation initiation factor 4B	10.3212	11.0921	-9.30991	-1.70631	0	0	down	coding	37
1555251_a_at	OTOF	NM_004802	otoferlin	6.48081	5.74358	7.84516	1.66698	0	0	up	coding	38
216565_x_at	OTTHUMG00000003319	---	NULL	10.3768	9.69144	9.61278	1.60815	0	0	up	coding	39
203946_s_at	ARG2	NM_001172	arginase 2	5.26691	4.59476	7.2646	1.59345	0	0	up	coding	40
228361_at	E2F2	NM_004091	E2F transcription factor 2	8.35273	7.68262	7.79631	1.59119	0	0	up	coding	41
243754_at	---	---	---	6.80176	6.13476	7.81052	1.58777	0	0	up	coding	42
216667_at	ECRP	NR_033909	ribonuclease, RNase A family, 2 (liver, eosinophil-derived neurotoxin) pseudogene	6.91722	6.25517	7.64626	1.58232	0	0	up	coding	43
1555411_a_at	CCNL1	NM_020307	cyclin L1	11.4188	10.7745	7.28674	1.56307	0	0	up	coding	44
203304_at	BAMBI	NM_012342	BMP and activin membrane-bound inhibitor homolog (Xenopus laevis)	6.33501	5.69525	7.22729	1.55806	0	0	up	coding	45
211938_at	EIF4B	NM_001417	eukaryotic translation initiation factor 4B	10.9818	11.6062	-9.20828	-1.54158	0	0	down	coding	46
234339_s_at	GLTSCR2	NM_015710	glioma tumor suppressor candidate region gene 2	10.7038	11.3241	-9.05842	-1.53713	0	0	down	coding	47
217969_at	VPS51	NM_013265	vacuolar protein sorting 51 homolog (S. cerevisiae)	9.98876	10.5924	-7.26974	-1.51955	0	0	down	coding	48
229305_at	MLF1IP	NM_024629	MLF1 interacting protein	5.07656	4.50082	7.91406	1.49043	0	0	up	coding	49
230350_at	---	---	---	8.28064	8.85616	-7.66496	-1.49022	0	0	down	coding	50
211623_s_at	FBL	NM_001436	fibrillarin	10.7459	11.2865	-8.0152	-1.4546	0	0	down	coding	51
239529_at	C5orf20	NM_001099221	chromosome 5 open reading frame 20	4.64379	5.16715	-7.91396	-1.4373	0	0	down	coding	52
224753_at	CDCA5	NM_080668	cell division cycle associated 5	7.13668	6.62451	7.25102	1.4262	0	0	up	coding	53
210048_at	NAPG	NM_003826	N-ethylmaleimide-sensitive factor attachment protein, gamma	7.16687	6.67306	7.44925	1.40816	0	0	up	coding	54
203113_s_at	EEF1D	NM_001130053	eukaryotic translation elongation factor 1 delta (guanine nucleotide exchange protein)	11.7793	12.2681	-7.32064	-1.40327	0	0	down	coding	55
217719_at	EIF3L	NM_001242923	eukaryotic translation initiation factor 3, subunit L	12.3939	12.8634	-8.18381	-1.38466	0	0	down	coding	56
202917_s_at	S100A8	NM_002964	S100 calcium binding protein A8	14.1838	13.7152	8.17118	1.3838	0	0	up	coding	57
223003_at	C19orf43	NM_024038	chromosome 19 open reading frame 43	10.6482	11.1001	-7.89436	-1.36791	0	0	down	coding	58
217846_at	QARS	NM_001272073	glutaminyl-tRNA synthetase	10.7495	11.1938	-7.11761	-1.36064	0	0	down	coding	59
238021_s_at	CRNDE	NR_034105	colorectal neoplasia differentially expressed (non-protein coding)	3.91172	3.4686	7.66008	1.35954	0	0	up	coding	60
201433_s_at	PTDSS1	NM_014754	phosphatidylserine synthase 1	10.0711	10.4514	-8.13566	-1.30162	0	0	down	coding	61
201154_x_at	RPL4	NM_000968	ribosomal protein L4	13.1243	13.4859	-7.7133	-1.28487	0	0	down	coding	62
238977_at	MCM6	NM_005915	minichromosome maintenance complex component 6	4.45816	4.11356	7.71659	1.2698	0	0	up	coding	63
200689_x_at	EEF1G	NM_001404	eukaryotic translation elongation factor 1 gamma	13.284	13.6215	-7.46343	-1.26358	0	0	down	coding	64
211345_x_at	EEF1G	NM_001404	eukaryotic translation elongation factor 1 gamma	13.32	13.6521	-7.23748	-1.25887	0	0	down	coding	65
215963_x_at	RPL3	NM_000967	ribosomal protein L3	13.2631	13.5883	-7.72792	-1.25285	0	0	down	coding	66
211710_x_at	RPL4	NM_000968	ribosomal protein L4	13.4109	13.7348	-7.59613	-1.25176	0	0	down	coding	67
211927_x_at	EEF1G	NM_001404	eukaryotic translation elongation factor 1 gamma	13.3408	13.6242	-7.02582	-1.21706	0	0	down	coding	68
211073_x_at	RNU86	NM_000967	RNA, U86 small nucleolar	13.4981	13.7701	-7.12095	-1.20745	0	0	down	coding	69
212039_x_at	RNU86	NM_000967	RNA, U86 small nucleolar	13.4735	13.7447	-7.68969	-1.20674	0	0	down	coding	70
200909_s_at	RPLP2	NM_001004	ribosomal protein, large, P2	13.7945	14.0439	-8.45565	-1.18873	0	0	down	coding	71
200725_x_at	RPL10	NM_001256577	ribosomal protein L10	13.6718	13.9111	-7.17608	-1.18042	0	0	down	coding	72
202029_x_at	RPL38	NM_000999	ribosomal protein L38	13.4381	13.6107	-8.26611	-1.12713	0	0	down	coding	73
200029_at	RPL19	NM_000981	ribosomal protein L19	13.6239	13.7917	-6.78588	-1.12333	0	0	down	coding	74
206698_at	XK	NM_021083	X-linked Kx blood group (McLeod syndrome)	7.11806	5.43246	6.91469	3.21674	0	1e-06	up	coding	75
211657_at	CEACAM6	NM_002483	carcinoembryonic antigen-related cell adhesion molecule 6 (non-specific cross reacting antigen)	7.82834	6.41166	6.70978	2.66972	0	1e-06	up	coding	76
214470_at	KLRB1	NM_002258	killer cell lectin-like receptor subfamily B, member 1	9.88697	11.111	-7.2314	-2.33599	0	1e-06	down	coding	77
242335_at	SLC25A37	NM_016612	solute carrier family 25 (mitochondrial iron transporter), member 37	7.6022	6.39942	6.64271	2.30183	0	1e-06	up	coding	78
210222_s_at	RTN1	NM_001243115	reticulon 1	7.09886	8.14032	-7.12052	-2.05831	0	1e-06	down	coding	79
224707_at	CYSTM1	NM_032412	cysteine-rich transmembrane module containing 1	8.71767	7.68551	6.88472	2.04508	0	1e-06	up	coding	80
204822_at	TTK	NM_001166691	TTK protein kinase	5.18745	4.47266	6.77593	1.64125	0	1e-06	up	coding	81
201462_at	SCRN1	NM_001145513	secernin 1	7.87848	8.47881	-7.41992	-1.51606	0	1e-06	down	coding	82
208629_s_at	HADHA	NM_000182	hydroxyacyl-CoA dehydrogenase/3-ketoacyl-CoA thiolase/enoyl-CoA hydratase (trifunctional protein), alpha subunit	9.40449	9.83055	-6.52309	-1.34355	0	1e-06	down	coding	83
225347_at	ARL8A	NM_001256129	ADP-ribosylation factor-like 8A	8.33749	7.97315	7.19012	1.28729	0	1e-06	up	coding	84
200094_s_at	EEF2	NM_001961	eukaryotic translation elongation factor 2	12.6193	12.9689	-6.76965	-1.27414	0	1e-06	down	coding	85
212639_x_at	TUBA1B	NM_006082	tubulin, alpha 1b	12.4297	12.1326	6.77258	1.22861	0	1e-06	up	coding	86
1561708_at	MB21D1	NM_138441	Mab-21 domain containing 1	4.48724	4.20268	6.69654	1.21804	0	1e-06	up	coding	87
201217_x_at	RNU86	NM_000967	RNA, U86 small nucleolar	13.5098	13.7641	-6.49376	-1.19276	0	1e-06	down	coding	88
211542_x_at	RPS10	NM_001014	ribosomal protein S10	13.7991	14.0022	-6.72133	-1.15115	0	1e-06	down	coding	89
201049_s_at	RPS18	NM_022551	ribosomal protein S18	14.1583	14.3154	-6.99704	-1.11509	0	1e-06	down	coding	90
205033_s_at	DEFA1	NM_001042500	defensin, alpha 1	11.9911	8.58359	7.67659	10.6113	0	2e-06	up	coding	91
223836_at	FGFBP2	NM_031950	fibroblast growth factor binding protein 2	9.29431	10.441	-6.50286	-2.21402	0	2e-06	down	coding	92
205863_at	S100A12	NM_005621	S100 calcium binding protein A12	11.5275	10.4088	6.71683	2.17162	0	2e-06	up	coding	93
231455_at	LINC00487	NM_001001695	long intergenic non-protein coding RNA 487	5.28023	4.34654	6.48841	1.91016	0	2e-06	up	coding	94
218454_at	PLBD1	NM_024829	phospholipase B domain containing 1	11.3683	10.4361	6.79001	1.90823	0	2e-06	up	coding	95
242272_at	ZNF785	NM_152458	zinc finger protein 785	6.77261	7.41768	-7.21249	-1.56381	0	2e-06	down	coding	96
212646_at	RFTN1	NM_015150	raftlin, lipid raft linker 1	10.0394	10.4584	-6.46441	-1.33702	0	2e-06	down	coding	97
211666_x_at	RNU86	NM_000967	RNA, U86 small nucleolar	13.2657	13.6561	-6.49859	-1.31077	0	2e-06	down	coding	98
224621_at	MAPK1	NM_002745	mitogen-activated protein kinase 1	10.6606	11.0172	-6.54304	-1.2804	0	2e-06	down	coding	99
213045_at	MAST3	NM_015016	microtubule associated serine/threonine kinase 3	8.78429	9.12049	-6.63803	-1.26243	0	2e-06	down	coding	100
200936_at	RPL8	NM_000973	ribosomal protein L8	13.1037	13.3858	-6.65154	-1.21597	0	2e-06	down	coding	101
219519_s_at	SIGLEC1	NM_023068	sialic acid binding Ig-like lectin 1, sialoadhesin	8.42261	6.61726	6.89689	3.49513	0	3e-06	up	coding	102
216950_s_at	FCGR1A	NM_000566	Fc fragment of IgG, high affinity Ia, receptor (CD64)	9.13481	7.70847	6.77402	2.68765	0	3e-06	up	coding	103
1553177_at	SH2D1B	NM_053282	SH2 domain containing 1B	8.16713	9.1138	-6.33658	-1.92741	0	3e-06	down	coding	104
226804_at	FAM20A	NM_001243746	family with sequence similarity 20, member A	5.88172	5.16988	6.59479	1.63789	0	3e-06	up	coding	105
227654_at	FAM65C	NM_080829	family with sequence similarity 65, member C	6.15383	5.45566	6.8793	1.62245	0	3e-06	up	coding	106
201137_s_at	HLA-DPB1	NM_002121	major histocompatibility complex, class II, DP beta 1	11.6169	12.3072	-6.8883	-1.61363	0	3e-06	down	coding	107
225878_at	KIF1B	NM_015074	kinesin family member 1B	6.75685	6.10093	6.72232	1.57562	0	3e-06	up	coding	108
202130_at	RIOK3	NM_003831	RIO kinase 3	11.0603	10.5342	6.57294	1.44009	0	3e-06	up	coding	109
214022_s_at	IFITM1	NM_003641	interferon induced transmembrane protein 1	13.0119	12.5558	6.81893	1.37183	0	3e-06	up	coding	110
214542_x_at	HIST1H3F	NM_021018	histone cluster 1, H3f	7.52782	7.07536	6.79922	1.36837	0	3e-06	up	coding	111
206361_at	PTGDR2	NM_004778	prostaglandin D2 receptor 2	6.87975	7.30841	-6.89338	-1.34598	0	3e-06	down	coding	112
226987_at	RBM15B	NM_013286	RNA binding motif protein 15B	7.52379	7.82969	-6.61672	-1.23619	0	3e-06	down	coding	113
200651_at	GNB2L1	NM_006098	guanine nucleotide binding protein (G protein), beta polypeptide 2-like 1	13.3434	13.6068	-6.31711	-1.20033	0	3e-06	down	coding	114
203485_at	RTN1	NM_001243115	reticulon 1	6.52129	7.77123	-6.37617	-2.37831	0	4e-06	down	coding	115
203757_s_at	CEACAM6	NM_002483	carcinoembryonic antigen-related cell adhesion molecule 6 (non-specific cross reacting antigen)	6.56484	5.44893	6.20649	2.16731	0	4e-06	up	coding	116
229865_at	FNDC3B	NM_001135095	fibronectin type III domain containing 3B	7.1528	6.35808	6.66764	1.73475	0	4e-06	up	coding	117
205394_at	CHEK1	NM_001114121	checkpoint kinase 1	5.45479	4.86816	6.28792	1.50173	0	4e-06	up	coding	118
218091_at	AGFG1	NM_001135187	ArfGAP with FG repeats 1	9.33759	8.85881	6.73248	1.39356	0	4e-06	up	coding	119
213646_x_at	TUBA1B	NM_006082	tubulin, alpha 1b	12.6132	12.2936	6.40639	1.24793	0	4e-06	up	coding	120
214511_x_at	FCGR1B	NM_001004340	Fc fragment of IgG, high affinity Ib, receptor (CD64)	9.48057	8.15771	6.55971	2.50161	0	5e-06	up	coding	121
221748_s_at	TNS1	NM_022648	tensin 1	6.96356	5.78061	6.13841	2.2704	0	5e-06	up	coding	122
207275_s_at	ACSL1	NM_001995	acyl-CoA synthetase long-chain family member 1	9.31227	8.29182	6.35152	2.02854	0	5e-06	up	coding	123
207384_at	PGLYRP1	NM_005091	peptidoglycan recognition protein 1	7.83427	6.85616	6.11166	1.96988	0	5e-06	up	coding	124
204126_s_at	CDC45	NM_001178010	cell division cycle 45	6.6132	6.02358	6.8312	1.50484	0	5e-06	up	coding	125
210724_at	EMR3	NM_032571	egf-like module containing, mucin-like, hormone receptor-like 3	5.7171	6.26692	-6.67907	-1.4639	0	5e-06	down	coding	126
201812_s_at	C4orf46	NM_001008393	chromosome 4 open reading frame 46	11.852	12.2675	-6.63558	-1.33383	0	5e-06	down	coding	127
211750_x_at	TUBA1C	NM_032704	tubulin, alpha 1c	12.6395	12.3373	6.40424	1.23304	0	5e-06	up	coding	128
209251_x_at	TUBA1C	NM_032704	tubulin, alpha 1c	12.6409	12.3454	6.38357	1.22731	0	5e-06	up	coding	129
239253_at	---	---	---	3.69072	3.55083	6.14241	1.10183	0	5e-06	up	coding	130
231078_at	SLC25A37	NM_016612	solute carrier family 25 (mitochondrial iron transporter), member 37	8.25277	6.84692	6.34851	2.64975	0	6e-06	up	coding	131
235818_at	VSTM1	NM_198481	V-set and transmembrane domain containing 1	7.45562	6.49311	6.44322	1.94869	0	6e-06	up	coding	132
204043_at	TCN2	NM_000355	transcobalamin II	7.37923	6.74659	6.68531	1.55039	0	6e-06	up	coding	133
1553118_at	THEM4	NM_053055	thioesterase superfamily member 4	8.36865	8.97203	-6.84937	-1.51927	0	6e-06	down	coding	134
202136_at	ZMYND11	NM_001202464	zinc finger, MYND-type containing 11	9.34016	9.8931	-6.29478	-1.46707	0	6e-06	down	coding	135
200817_x_at	RPS10	NM_001014	ribosomal protein S10	13.8092	13.9889	-6.18119	-1.13262	0	6e-06	down	coding	136
216520_s_at	TPT1	NM_003295	tumor protein, translationally-controlled 1	14.0624	14.1978	-6.44893	-1.0984	0	6e-06	down	coding	137
204825_at	MELK	NM_001256685	maternal embryonic leucine zipper kinase	6.87706	6.10396	6.49348	1.70894	0	7e-06	up	coding	138
212203_x_at	IFITM3	NM_021034	interferon induced transmembrane protein 3	13.166	12.4486	6.7684	1.6443	0	7e-06	up	coding	139
214108_at	MAX	NM_001271068	MYC associated factor X	7.02055	6.35234	6.59354	1.5891	0	7e-06	up	coding	140
227959_at	---	---	---	5.1863	4.75717	6.06681	1.34642	0	7e-06	up	coding	141
232011_s_at	MAP1LC3A	NM_032514	microtubule-associated protein 1 light chain 3 alpha	5.74922	5.36687	6.37399	1.30346	0	7e-06	up	coding	142
200012_x_at	RPL21	NM_000982	ribosomal protein L21	13.7788	13.9479	-6.031	-1.12438	0	7e-06	down	coding	143
200926_at	RPS23	NM_001025	ribosomal protein S23	14.0766	14.1747	-6.34155	-1.07035	0	7e-06	down	coding	144
210797_s_at	OASL	NM_001261825	2'-5'-oligoadenylate synthetase-like	8.88442	7.8257	6.34817	2.08308	0	8e-06	up	coding	145
1554696_s_at	TYMS	NM_001071	thymidylate synthetase	7.87283	6.96269	6.43513	1.87922	0	8e-06	up	coding	146
223432_at	OSBP2	NM_030758	oxysterol binding protein 2	7.32105	6.62491	6.11956	1.62015	0	8e-06	up	coding	147
220046_s_at	CCNL1	NM_020307	cyclin L1	10.9509	10.4404	6.46016	1.42451	0	8e-06	up	coding	148
201601_x_at	IFITM1	NM_003641	interferon induced transmembrane protein 1	13.08	12.5779	6.53324	1.41634	0	8e-06	up	coding	149
229949_at	LOC101060147	XR_171042	uncharacterized LOC101060147	9.81341	10.2819	-6.47271	-1.38362	0	8e-06	down	coding	150
1553976_a_at	DPCD	NM_015448	deleted in primary ciliary dyskinesia homolog (mouse)	6.24912	5.82513	6.0061	1.34163	0	8e-06	up	coding	151
212118_at	TRIM27	NM_006510	tripartite motif containing 27	8.75806	9.16576	-6.35367	-1.32656	0	8e-06	down	coding	152
207042_at	E2F2	NM_004091	E2F transcription factor 2	6.27718	5.96089	6.12103	1.24512	0	8e-06	up	coding	153
224910_at	CARHSP1	NM_001042476	calcium regulated heat stable protein 1, 24kDa	7.52574	7.8317	-6.60855	-1.23625	0	8e-06	down	coding	154
219669_at	CD177	NM_020406	CD177 molecule	7.43385	6.41046	5.94896	2.03269	0	9e-06	up	coding	155
202068_s_at	LDLR	NM_000527	low density lipoprotein receptor	8.57013	7.44482	7.10983	2.18149	0	1e-05	up	coding	156
214407_x_at	GYPB	NM_002100	glycophorin B (MNS blood group)	7.08735	6.08001	5.90453	2.01021	0	1e-05	up	coding	157
202446_s_at	PLSCR1	NM_021105	phospholipid scramblase 1	11.1361	10.1802	6.38161	1.93971	0	1e-05	up	coding	158
215990_s_at	BCL6	NM_001130845	B-cell CLL/lymphoma 6	8.60905	7.88067	6.22807	1.65678	0	1e-05	up	coding	159
213476_x_at	TUBB3	NM_001197181	tubulin, beta 3 class III	8.97931	8.48328	6.21183	1.41033	0	1e-05	up	coding	160
200089_s_at	RPL4	NM_000968	ribosomal protein L4	12.505	12.8068	-5.93135	-1.23267	0	1e-05	down	coding	161
206871_at	ELANE	NM_001972	elastase, neutrophil expressed	7.51232	5.8966	6.02941	3.06464	0	1.1e-05	up	coding	162
205896_at	SLC22A4	NM_003059	solute carrier family 22 (organic cation/ergothioneine transporter), member 4	7.31257	6.31023	6.2104	2.00325	0	1.1e-05	up	coding	163
203535_at	S100A9	NM_002965	S100 calcium binding protein A9	13.4618	12.826	6.19318	1.55387	0	1.1e-05	up	coding	164
221747_at	TNS1	NM_022648	tensin 1	6.56227	5.98794	5.88831	1.48898	0	1.1e-05	up	coding	165
203127_s_at	SPTLC2	NM_004863	serine palmitoyltransferase, long chain base subunit 2	9.40219	8.85466	6.10144	1.46158	0	1.1e-05	up	coding	166
243973_at	---	---	---	6.06879	6.53794	-6.76348	-1.38429	0	1.1e-05	down	coding	167
201090_x_at	TUBA1B	NM_006082	tubulin, alpha 1b	12.2979	11.981	6.06902	1.24566	0	1.1e-05	up	coding	168
208692_at	RPS3	NM_001005	ribosomal protein S3	13.4672	13.7057	-6.17882	-1.17977	0	1.1e-05	down	coding	169
210746_s_at	EPB42	NM_000119	erythrocyte membrane protein band 4.2	7.6265	6.36885	5.87363	2.39106	0	1.2e-05	up	coding	170
235568_at	C19orf59	NM_174918	chromosome 19 open reading frame 59	9.46303	8.59018	5.93454	1.83128	0	1.2e-05	up	coding	171
210559_s_at	CDK1	NM_001130829	cyclin-dependent kinase 1	7.01622	6.14472	6.44612	1.82957	0	1.2e-05	up	coding	172
212224_at	ALDH1A1	NM_000689	aldehyde dehydrogenase 1 family, member A1	6.72043	7.53653	-6.05467	-1.76065	0	1.2e-05	down	coding	173
203966_s_at	PPM1A	NM_021003	protein phosphatase, Mg2+/Mn2+ dependent, 1A	10.0997	9.53968	6.10733	1.47426	0	1.2e-05	up	coding	174
207341_at	PRTN3	NM_002777	proteinase 3	5.85346	4.77567	5.83108	2.11081	0	1.3e-05	up	coding	175
212070_at	GPR56	NM_001145770	G protein-coupled receptor 56	9.23543	10.1203	-6.11888	-1.84664	0	1.3e-05	down	coding	176
211546_x_at	SNCA	NM_000345	synuclein, alpha (non A4 component of amyloid precursor)	8.95057	8.10928	5.82914	1.79166	0	1.3e-05	up	coding	177
223092_at	ANKH	NM_054027	ankylosis, progressive homolog (mouse)	8.77226	9.39954	-6.3842	-1.54465	0	1.3e-05	down	coding	178
208724_s_at	RAB1A	NM_004161	RAB1A, member RAS oncogene family	11.7816	11.315	6.433	1.38193	0	1.3e-05	up	coding	179
201315_x_at	IFITM2	NM_006435	interferon induced transmembrane protein 2	13.104	12.6512	6.20825	1.36876	0	1.3e-05	up	coding	180
222666_s_at	RCL1	NM_005772	RNA terminal phosphate cyclase-like 1	7.54606	7.11159	5.99365	1.35142	0	1.3e-05	up	coding	181
1552755_at	C9orf66	NM_152569	chromosome 9 open reading frame 66	6.07623	5.74807	5.82702	1.25541	0	1.3e-05	up	coding	182
200747_s_at	NUMA1	NM_006185	nuclear mitotic apparatus protein 1	9.31928	9.59617	-5.94482	-1.21158	0	1.3e-05	down	coding	183
1569808_at	---	---	---	3.87915	3.70793	6.18479	1.126	0	1.3e-05	up	coding	184
203021_at	SLPI	NM_003064	secretory leukocyte peptidase inhibitor	6.93618	6.20057	5.81637	1.6651	0	1.4e-05	up	coding	185
221952_x_at	TRMT5	NM_020810	tRNA methyltransferase 5 homolog (S. cerevisiae)	11.7496	11.4591	6.11248	1.22308	0	1.4e-05	up	coding	186
200986_at	SERPING1	NM_000062	serpin peptidase inhibitor, clade G (C1 inhibitor), member 1	7.54509	6.27298	6.03816	2.41516	0	1.5e-05	up	coding	187
207838_x_at	PBXIP1	NM_020524	pre-B-cell leukemia homeobox interacting protein 1	8.29304	8.76844	-6.07789	-1.3903	0	1.5e-05	down	coding	188
242538_at	---	---	---	5.36766	5.09085	6.02045	1.21151	0	1.5e-05	up	coding	189
200674_s_at	RPL32	NM_000994	ribosomal protein L32	13.966	14.1108	-5.86686	-1.10562	0	1.5e-05	down	coding	190
211821_x_at	GYPA	NM_002099	glycophorin A (MNS blood group)	5.61565	4.45817	5.75562	2.23069	0	1.6e-05	up	coding	191
202201_at	BLVRB	NM_000713	biliverdin reductase B (flavin reductase (NADPH))	9.88712	9.09941	5.94201	1.72632	0	1.6e-05	up	coding	192
203556_at	ZHX2	NM_014943	zinc fingers and homeoboxes 2	9.14082	9.59777	-5.96537	-1.37263	0	1.6e-05	down	coding	193
208786_s_at	MAP1LC3B	NM_022818	microtubule-associated protein 1 light chain 3 beta	10.8341	10.3794	6.12905	1.37046	0	1.6e-05	up	coding	194
212947_at	SLC9A8	NM_001260491	solute carrier family 9, subfamily A (NHE8, cation proton antiporter 8), member 8	7.4375	7.08961	6.03381	1.2727	0	1.6e-05	up	coding	195
200025_s_at	RPL27	NM_000988	ribosomal protein L27	13.6389	13.8081	-6.02743	-1.1244	0	1.6e-05	down	coding	196
213890_x_at	RPS16	NM_001020	ribosomal protein S16	13.8516	13.9982	-5.96232	-1.10692	0	1.6e-05	down	coding	197
215894_at	PTGDR	NM_000953	prostaglandin D2 receptor (DP)	5.76131	7.32638	-6.73978	-2.95892	0	1.7e-05	down	coding	198
201292_at	TOP2A	NM_001067	topoisomerase (DNA) II alpha 170kDa	6.85202	5.79173	6.28489	2.08534	0	1.7e-05	up	coding	199
220807_at	HBQ1	NM_005331	hemoglobin, theta 1	7.03956	5.99605	5.80462	2.06124	0	1.7e-05	up	coding	200
201963_at	ACSL1	NM_001995	acyl-CoA synthetase long-chain family member 1	9.77412	8.74534	6.16896	2.0403	0	1.7e-05	up	coding	201
212671_s_at	HLA-DQA1	NM_002122	major histocompatibility complex, class II, DQ alpha 1	11.0168	11.8221	-5.82012	-1.74748	0	1.7e-05	down	coding	202
222067_x_at	HIST1H2BD	NM_021063	histone cluster 1, H2bd	9.25693	8.63531	6.15923	1.5386	0	1.7e-05	up	coding	203
214537_at	HIST1H1D	NM_005320	histone cluster 1, H1d	6.63896	6.16045	5.85667	1.3933	0	1.7e-05	up	coding	204
201561_s_at	CLSTN1	NM_001009566	calsyntenin 1	8.89931	9.24405	-5.97043	-1.26993	0	1.7e-05	down	coding	205
207802_at	CRISP3	NM_001190986	cysteine-rich secretory protein 3	5.45047	4.1114	5.73643	2.52988	0	1.8e-05	up	coding	206
1555758_a_at	CDKN3	NM_001130851	cyclin-dependent kinase inhibitor 3	6.98583	6.18534	6.0078	1.74169	0	1.8e-05	up	coding	207
1552639_at	KLHDC7B	NM_138433	kelch domain containing 7B	7.66059	7.02637	6.2232	1.55211	0	1.8e-05	up	coding	208
212085_at	SLC25A6	NM_001636	solute carrier family 25 (mitochondrial carrier; adenine nucleotide translocator), member 6	12.273	12.5857	-5.72583	-1.24207	0	1.8e-05	down	coding	209
218883_s_at	MLF1IP	NM_024629	MLF1 interacting protein	8.1085	7.04912	6.5259	2.08403	0	1.9e-05	up	coding	210
205330_at	MN1	NM_002430	meningioma (disrupted in balanced translocation) 1	5.69177	4.85348	5.71572	1.78794	0	1.9e-05	up	coding	211
226276_at	TMEM167A	NM_174909	transmembrane protein 167A	10.316	9.66567	6.20498	1.56948	0	1.9e-05	up	coding	212
215967_s_at	LY9	NM_001033667	lymphocyte antigen 9	8.93469	9.38952	-6.02163	-1.37063	0	1.9e-05	down	coding	213
208785_s_at	MAP1LC3B	NM_022818	microtubule-associated protein 1 light chain 3 beta	9.85817	9.45005	5.91517	1.32695	0	1.9e-05	up	coding	214
208752_x_at	NAP1L1	NM_004537	nucleosome assembly protein 1-like 1	12.0734	12.3709	-5.72617	-1.22903	0	1.9e-05	down	coding	215
213687_s_at	RPL35A	NM_000996	ribosomal protein L35a	13.0701	13.3327	-5.77652	-1.19961	0	1.9e-05	down	coding	216
211058_x_at	TUBA1B	NM_006082	tubulin, alpha 1b	12.5845	12.323	5.82808	1.19875	0	1.9e-05	up	coding	217
200095_x_at	RPS10	NM_001014	ribosomal protein S10	13.8579	14.0835	-6.24085	-1.16924	0	1.9e-05	down	coding	218
234873_x_at	RPL7A	NM_000972	ribosomal protein L7a	13.0093	13.2121	-5.70915	-1.15086	0	1.9e-05	down	coding	219
200062_s_at	RPL30	NM_000989	ribosomal protein L30	13.8395	13.9646	-5.72616	-1.09057	0	1.9e-05	down	coding	220
205950_s_at	CA1	NM_001128829	carbonic anhydrase I	8.40969	7.14898	5.68013	2.39613	0	2e-05	up	coding	221
205660_at	OASL	NM_001261825	2'-5'-oligoadenylate synthetase-like	8.84535	7.71665	6.04931	2.18662	0	2e-05	up	coding	222
224654_at	DDX21	NM_001256910	DEAD (Asp-Glu-Ala-Asp) box helicase 21	10.688	10.1604	6.08362	1.4416	0	2e-05	up	coding	223
231094_s_at	LOC100996643	NM_001242767	monofunctional C1-tetrahydrofolate synthase, mitochondrial-like	6.72569	6.35469	5.93548	1.29325	0	2e-05	up	coding	224
229500_at	SLC30A9	NM_006345	solute carrier family 30 (zinc transporter), member 9	5.33549	4.99667	5.84791	1.26472	0	2e-05	up	coding	225
211560_s_at	ALAS2	NM_000032	aminolevulinate, delta-, synthase 2	9.17445	7.15791	5.84562	4.04614	0	2.1e-05	up	coding	226
219555_s_at	CENPN	NM_001100624	centromere protein N	7.7646	7.09801	6.1037	1.58731	0	2.1e-05	up	coding	227
210667_s_at	C21orf33	NM_004649	chromosome 21 open reading frame 33	7.45754	7.89688	-5.74664	-1.35599	0	2.1e-05	down	coding	228
203213_at	CDK1	NM_001130829	cyclin-dependent kinase 1	6.495	5.71832	5.96601	1.71318	0	2.2e-05	up	coding	229
224783_at	UBALD2	NM_182565	UBA-like domain containing 2	10.5928	10.1051	5.97925	1.40223	0	2.3e-05	up	coding	230
223880_x_at	C20orf24	NM_001199534	chromosome 20 open reading frame 24	11.3998	10.9941	6.15039	1.32477	0	2.3e-05	up	coding	231
231297_at	DOT1L	NM_032482	DOT1-like histone H3K79 methyltransferase	8.43733	8.10117	5.99391	1.26239	0	2.3e-05	up	coding	232
210640_s_at	GPER	NM_001031682	G protein-coupled estrogen receptor 1	6.55141	6.22665	5.80917	1.25245	0	2.3e-05	up	coding	233
221700_s_at	UBA52	NM_001033930	ubiquitin A-52 residue ribosomal protein fusion product 1	13.1114	13.2827	-5.72982	-1.12607	0	2.3e-05	down	coding	234
208583_x_at	HIST1H2AG	NM_003509	histone cluster 1, H2ag	7.87704	7.28484	6.14902	1.50754	0	2.4e-05	up	coding	235
224606_at	KLF6	NM_001008490	Kruppel-like factor 6	11.5811	11.0809	6.07538	1.41438	0	2.4e-05	up	coding	236
214021_x_at	ITGB5	NM_002213	integrin, beta 5	3.98877	3.74952	5.71691	1.18038	0	2.5e-05	up	coding	237
209427_at	SMTN	NM_001207017	smoothelin	6.66658	6.44402	5.68733	1.16681	0	2.5e-05	up	coding	238
209714_s_at	CDKN3	NM_001130851	cyclin-dependent kinase inhibitor 3	6.86427	6.02466	6.03931	1.78957	0	2.6e-05	up	coding	239
204709_s_at	KIF23	NM_004856	kinesin family member 23	4.36936	3.84261	5.79877	1.44068	0	2.6e-05	up	coding	240
232070_at	LOC100506639	NR_102752	uncharacterized LOC100506639	5.40091	5.85966	-6.64904	-1.37435	0	2.6e-05	down	coding	241
203502_at	BPGM	NM_001724	2,3-bisphosphoglycerate mutase	8.32076	7.11768	5.63159	2.3023	0	2.7e-05	up	coding	242
226179_at	SLC25A37	NM_016612	solute carrier family 25 (mitochondrial iron transporter), member 37	9.11311	8.24906	5.69794	1.82014	0	2.7e-05	up	coding	243
228258_at	TBC1D10C	NM_001256508	TBC1 domain family, member 10C	10.2606	10.7933	-5.70863	-1.44668	0	2.7e-05	down	coding	244
226064_s_at	DGAT2	NM_001253891	diacylglycerol O-acyltransferase 2	7.23715	6.7367	5.74207	1.41465	0	2.7e-05	up	coding	245
46270_at	UBAP1	NM_001171201	ubiquitin associated protein 1	8.28331	7.87852	5.94386	1.3239	0	2.7e-05	up	coding	246
205718_at	ITGB7	NM_000889	integrin, beta 7	9.26565	9.66134	-5.98501	-1.31557	0	2.7e-05	down	coding	247
226468_at	LOC101060478	NM_014455	E3 ubiquitin-protein ligase RNF115-like	7.75759	8.04831	-5.84529	-1.22325	0	2.7e-05	down	coding	248
235749_at	UGGT2	NM_020121	UDP-glucose glycoprotein glucosyltransferase 2	3.86909	3.59366	5.62589	1.21036	0	2.7e-05	up	coding	249
202241_at	TRIB1	NM_025195	tribbles homolog 1 (Drosophila)	10.2182	9.05807	6.20024	2.23479	0	2.8e-05	up	coding	250
202252_at	RAB13	NM_001272038	RAB13, member RAS oncogene family	7.53111	6.82257	5.83401	1.63414	0	2.8e-05	up	coding	251
225142_at	JHDM1D	NM_030647	jumonji C domain containing histone demethylase 1 homolog D (S. cerevisiae)	7.82364	7.15509	6.17165	1.58948	0	2.8e-05	up	coding	252
231912_s_at	TECPR1	NM_015395	tectonin beta-propeller repeat containing 1	7.87819	8.46569	-5.60487	-1.50264	0	2.8e-05	down	coding	253
236821_at	---	---	---	5.60901	5.31015	6.0544	1.23017	0	2.8e-05	up	coding	254
221246_x_at	TNS1	NM_022648	tensin 1	7.10742	6.67621	5.76565	1.34837	0	2.9e-05	up	coding	255
217835_x_at	C20orf24	NM_001199534	chromosome 20 open reading frame 24	11.5309	11.1033	6.08919	1.34506	0	2.9e-05	up	coding	256
212657_s_at	IL1RN	NM_000577	interleukin 1 receptor antagonist	9.12728	8.04349	5.96113	2.1196	0	3e-05	up	coding	257
224451_x_at	ARHGAP9	NM_001080156	Rho GTPase activating protein 9	10.8228	11.0817	-5.7344	-1.19657	0	3e-05	down	coding	258
205041_s_at	ORM1	NM_000607	orosomucoid 1	6.05387	4.9236	5.59837	2.18899	0	3.1e-05	up	coding	259
218638_s_at	LOC100130872	NM_001128325	uncharacterized LOC100130872	9.22927	10.0434	-5.79825	-1.75822	0	3.1e-05	down	coding	260
212914_at	CBX7	NM_175709	chromobox homolog 7	8.18419	8.65019	-5.96779	-1.38128	0	3.1e-05	down	coding	261
228499_at	PFKFB4	NM_004567	6-phosphofructo-2-kinase/fructose-2,6-biphosphatase 4	7.93505	7.53527	5.62769	1.31931	0	3.1e-05	up	coding	262
225312_at	COMMD6	NM_203495	COMM domain containing 6	11.3685	11.6772	-5.7391	-1.23856	0	3.1e-05	down	coding	263
200715_x_at	RPL13A	NM_001270491	ribosomal protein L13a	13.0368	13.3119	-5.74001	-1.21009	0	3.1e-05	down	coding	264
227770_at	COG8	NM_032382	component of oligomeric golgi complex 8	7.88015	8.12889	-6.11334	-1.18817	0	3.1e-05	down	coding	265
219529_at	CLIC3	NM_004669	chloride intracellular channel 3	7.93706	8.86407	-5.84601	-1.90134	0	3.2e-05	down	coding	266
214433_s_at	SELENBP1	NM_001258288	selenium binding protein 1	7.09979	5.70777	5.52087	2.62445	0	3.3e-05	up	coding	267
221601_s_at	FAIM3	NM_001142472	Fas apoptotic inhibitory molecule 3	11.3025	11.9108	-5.74734	-1.52449	0	3.3e-05	down	coding	268
202580_x_at	FOXM1	NM_001243088	forkhead box M1	6.28441	5.75596	5.90703	1.44238	0	3.3e-05	up	coding	269
214121_x_at	PDLIM7	NM_005451	PDZ and LIM domain 7 (enigma)	7.11142	6.64324	5.79968	1.38336	0	3.3e-05	up	coding	270
2028_s_at	E2F1	NM_005225	E2F transcription factor 1	6.905	6.53879	6.00246	1.28896	0	3.3e-05	up	coding	271
209827_s_at	IL16	NM_001172128	interleukin 16	9.99418	10.3584	-5.67834	-1.28722	0	3.3e-05	down	coding	272
242945_at	FAM20A	NM_001243746	family with sequence similarity 20, member A	6.52351	5.70808	5.75496	1.75982	0	3.4e-05	up	coding	273
203958_s_at	ZBTB40	NM_001083621	zinc finger and BTB domain containing 40	6.33421	6.82498	-6.25245	-1.4052	0	3.4e-05	down	coding	274
204351_at	S100P	NM_005980	S100 calcium binding protein P	9.19844	7.67192	5.92706	2.8809	0	3.5e-05	up	coding	275
224301_x_at	H2AFJ	NM_018267	H2A histone family, member J	10.0639	9.49688	6.19977	1.48151	0	3.5e-05	up	coding	276
227904_at	AZI2	NM_001134432	5-azacytidine induced 2	6.28629	5.82327	5.89679	1.37842	0	3.5e-05	up	coding	277
220570_at	RETN	NM_001193374	resistin	8.53962	7.52309	5.5839	2.02305	0	3.6e-05	up	coding	278
227203_at	FBXL17	NM_001163315	F-box and leucine-rich repeat protein 17	7.56368	7.90855	-6.05246	-1.27004	0	3.6e-05	down	coding	279
213257_at	SARM1	NM_015077	sterile alpha and TIR motif containing 1	6.80523	7.05471	-5.79364	-1.18877	0	3.6e-05	down	coding	280
206157_at	PTX3	NM_002852	pentraxin 3, long	6.03165	5.06965	5.68056	1.948	0	3.7e-05	up	coding	281
223169_s_at	RHOU	NM_021205	ras homolog family member U	7.27531	6.39826	5.82695	1.83662	0	3.7e-05	up	coding	282
222557_at	STMN3	NM_001276310	stathmin-like 3	9.19525	9.80606	-5.94228	-1.52711	0	3.7e-05	down	coding	283
225245_x_at	H2AFJ	NM_018267	H2A histone family, member J	10.0902	9.49059	6.2168	1.51532	0	3.7e-05	up	coding	284
215819_s_at	RHCE	NM_001127691	Rh blood group, CcEe antigens	5.80322	5.30093	5.52888	1.41646	0	3.7e-05	up	coding	285
204729_s_at	STX1A	NM_001165903	syntaxin 1A (brain)	7.43445	7.00099	5.51253	1.35047	0	3.7e-05	up	coding	286
205024_s_at	RAD51	NM_001164269	RAD51 homolog (S. cerevisiae)	7.16677	6.75935	5.60664	1.32631	0	3.7e-05	up	coding	287
202122_s_at	PLIN3	NM_001164189	perilipin 3	9.59625	9.21038	5.65383	1.30665	0	3.7e-05	up	coding	288
218838_s_at	TTC31	NM_022492	tetratricopeptide repeat domain 31	8.40361	8.72078	-5.5986	-1.24589	0	3.7e-05	down	coding	289
1561039_a_at	ZNF81	NM_007137	zinc finger protein 81	5.5716	5.31304	6.05286	1.19628	0	3.7e-05	up	coding	290
207827_x_at	SNCA	NM_000345	synuclein, alpha (non A4 component of amyloid precursor)	9.26903	8.4098	5.47266	1.81408	0	3.9e-05	up	coding	291
211820_x_at	GYPA	NM_002099	glycophorin A (MNS blood group)	5.66684	4.87454	5.50828	1.73184	0	3.9e-05	up	coding	292
227438_at	ALPK1	NM_001102406	alpha-kinase 1	7.42856	7.00166	5.59251	1.34434	0	4e-05	up	coding	293
202589_at	TYMS	NM_001071	thymidylate synthetase	9.42243	8.15845	6.22407	2.40158	0	4.2e-05	up	coding	294
202338_at	TK1	NM_003258	thymidine kinase 1, soluble	6.62854	5.92281	6.27312	1.63096	0	4.2e-05	up	coding	295
222037_at	MCM4	NM_005914	minichromosome maintenance complex component 4	5.25741	4.6873	5.70669	1.48464	0	4.2e-05	up	coding	296
218865_at	2018-03-01	NM_022746	mitochondrial amidoxime reducing component 1	8.20564	7.73942	5.63858	1.38149	0	4.2e-05	up	coding	297
201574_at	ETF1	NM_004730	eukaryotic translation termination factor 1	9.71383	9.26478	5.86445	1.36514	0	4.2e-05	up	coding	298
236646_at	TMEM52B	NM_153022	transmembrane protein 52B	3.91732	3.62389	5.44813	1.22555	0	4.2e-05	up	coding	299
1555281_x_at	ARMC8	NM_001267041	armadillo repeat containing 8	6.17521	5.47631	5.9405	1.62326	0	4.4e-05	up	coding	300
202219_at	SLC6A8	NM_001142805	solute carrier family 6 (neurotransmitter transporter, creatine), member 8	7.45899	6.67836	5.4337	1.71787	0	4.5e-05	up	coding	301
210189_at	HSPA1L	NM_005527	heat shock 70kDa protein 1-like	7.06808	7.59548	-6.0679	-1.44133	0	4.5e-05	down	coding	302
216336_x_at	MT1P3	---	metallothionein 1 pseudogene 3	9.00429	8.48061	5.60753	1.43761	0	4.5e-05	up	coding	303
216903_s_at	MICU1	NM_001195518	mitochondrial calcium uptake 1	8.97501	8.49117	6.0262	1.39847	0	4.6e-05	up	coding	304
241433_at	RCOR3	NM_001136223	REST corepressor 3	5.80148	5.45012	5.54339	1.27576	0	4.6e-05	up	coding	305
229972_at	AC147651.4	---	NULL	6.97416	6.6418	5.75628	1.25907	0	4.6e-05	up	coding	306
240968_at	---	---	---	4.21542	4.04607	5.57654	1.12455	0	4.6e-05	up	coding	307
217202_s_at	GLUL	NM_001033044	glutamate-ammonia ligase	9.5122	8.61409	5.8863	1.86361	0	4.7e-05	up	coding	308
201064_s_at	PABPC4	NM_001135653	poly(A) binding protein, cytoplasmic 4 (inducible form)	9.7069	10.1448	-5.81006	-1.3546	0	4.7e-05	down	coding	309
219403_s_at	HPSE	NM_001098540	heparanase	8.22991	7.39564	5.65305	1.78295	0	4.8e-05	up	coding	310
228055_at	NAPSB	NR_002798	napsin B aspartic peptidase, pseudogene	8.96473	9.77352	-5.6794	-1.75174	0	4.8e-05	down	coding	311
210101_x_at	SH3GLB1	NM_001206651	SH3-domain GRB2-like endophilin B1	10.1572	9.74254	5.83731	1.33295	0	4.8e-05	up	coding	312
219774_at	CCDC93	NM_019044	coiled-coil domain containing 93	7.33555	7.01556	5.78951	1.24832	0	4.8e-05	up	coding	313
201859_at	SRGN	NM_002727	serglycin	12.7132	12.4707	5.75882	1.18304	0	4.8e-05	up	coding	314
210582_s_at	LIMK2	NM_001031801	LIM domain kinase 2	7.37252	6.99641	5.4109	1.29784	0	4.9e-05	up	coding	315
216063_at	HBBP1	NR_001589	hemoglobin, beta pseudogene 1	5.7382	4.9311	5.39709	1.74968	0	5e-05	up	coding	316
201543_s_at	SAR1A	NM_001142648	SAR1 homolog A (S. cerevisiae)	8.66631	7.94348	6.00914	1.65042	0	5e-05	up	coding	317
202896_s_at	SIRPA	NM_001040022	signal-regulatory protein alpha	8.11561	7.48709	5.7174	1.54598	0	5e-05	up	coding	318
225918_at	GLG1	NM_001145666	golgi glycoprotein 1	8.93115	9.39681	-5.73616	-1.38095	0	5e-05	down	coding	319
38158_at	ESPL1	NM_012291	extra spindle pole bodies homolog 1 (S. cerevisiae)	6.9764	6.51337	6.08575	1.37844	0	5e-05	up	coding	320
243951_at	ABCB1	NM_000927	ATP-binding cassette, sub-family B (MDR/TAP), member 1	6.18223	6.61641	-6.10936	-1.35114	0	5e-05	down	coding	321
220123_at	SLC35F5	NM_025181	solute carrier family 35, member F5	4.56998	4.1398	5.76868	1.3474	0	5e-05	up	coding	322
217740_x_at	RPL7A	NM_000972	ribosomal protein L7a	13.6785	13.8392	-5.38259	-1.11785	0	5e-05	down	coding	323
212734_x_at	RPL13	NM_000977	ribosomal protein L13	13.8756	14.0333	-5.48384	-1.11552	0	5e-05	down	coding	324
227935_s_at	PCGF5	NM_001256549	polycomb group ring finger 5	9.50812	8.73191	5.90779	1.71263	1e-06	5.1e-05	up	coding	325
209408_at	KIF2C	NM_006845	kinesin family member 2C	7.29215	6.91991	5.64126	1.29436	1e-06	5.1e-05	up	coding	326
224327_s_at	DGAT2	NM_001253891	diacylglycerol O-acyltransferase 2	7.64143	7.17966	5.54199	1.37723	1e-06	5.2e-05	up	coding	327
203454_s_at	ATOX1	NM_004045	antioxidant 1 copper chaperone	9.16319	8.72294	5.7958	1.35684	1e-06	5.2e-05	up	coding	328
201272_at	AKR1B1	NM_001628	aldo-keto reductase family 1, member B1 (aldose reductase)	9.57639	9.94469	-5.40706	-1.29083	1e-06	5.2e-05	down	coding	329
219248_at	THUMPD2	NM_025264	THUMP domain containing 2	7.95388	7.55982	5.50695	1.31409	1e-06	5.3e-05	up	coding	330
228370_at	LOC100506948	NR_001293	uncharacterized LOC100506948	7.95164	8.52448	-5.66365	-1.48745	1e-06	5.4e-05	down	coding	331
213650_at	GOLGA8A	NM_001023567	golgin A8 family, member A	7.21733	7.75575	-5.92685	-1.45239	1e-06	5.4e-05	down	coding	332
205040_at	ORM1	NM_000607	orosomucoid 1	6.44141	5.46617	5.57109	1.96598	1e-06	5.7e-05	up	coding	333
205715_at	BST1	NM_004334	bone marrow stromal cell antigen 1	8.69028	7.93591	5.61591	1.6869	1e-06	5.7e-05	up	coding	334
212910_at	THAP11	NM_020457	THAP domain containing 11	8.98365	9.31085	-5.48035	-1.25457	1e-06	5.7e-05	down	coding	335
200002_at	RPL35	NM_007209	ribosomal protein L35	12.9323	13.1841	-5.35813	-1.19074	1e-06	5.7e-05	down	coding	336
225655_at	UHRF1	NM_001048201	ubiquitin-like with PHD and ring finger domains 1	7.10386	6.19438	5.77538	1.87836	1e-06	5.8e-05	up	coding	337
231736_x_at	MGST1	NM_001260511	microsomal glutathione S-transferase 1	9.02471	8.22443	5.64615	1.74144	1e-06	5.9e-05	up	coding	338
205987_at	CD1C	NM_001765	CD1c molecule	8.52482	9.27718	-6.04805	-1.68455	1e-06	5.9e-05	down	coding	339
238542_at	ULBP2	NM_025217	UL16 binding protein 2	5.14315	4.72645	5.36904	1.33487	1e-06	5.9e-05	up	coding	340
208218_s_at	ACVR1B	NM_004302	activin A receptor, type IB	6.13947	5.77208	5.58362	1.29001	1e-06	5.9e-05	up	coding	341
208668_x_at	HMGN2	NM_005517	high mobility group nucleosomal binding domain 2	12.887	12.6391	5.53229	1.18751	1e-06	5.9e-05	up	coding	342
204033_at	TRIP13	NM_001166260	thyroid hormone receptor interactor 13	6.5079	6.02146	5.52245	1.40099	1e-06	6.1e-05	up	coding	343
201898_s_at	UBE2A	NM_003336	ubiquitin-conjugating enzyme E2A	9.58034	9.25862	5.6771	1.24982	1e-06	6.1e-05	up	coding	344
232581_x_at	HIVEP3	NM_001127714	human immunodeficiency virus type I enhancer binding protein 3	7.96113	7.74532	5.71615	1.16136	1e-06	6.1e-05	up	coding	345
207459_x_at	GYPB	NM_002100	glycophorin B (MNS blood group)	7.09626	6.29378	5.32688	1.74409	1e-06	6.2e-05	up	coding	346
202320_at	GTF3C1	NM_001520	general transcription factor IIIC, polypeptide 1, alpha 220kDa	8.03954	8.40518	-5.77536	-1.28845	1e-06	6.2e-05	down	coding	347
229271_x_at	COL11A1	NM_001190709	collagen, type XI, alpha 1	3.25735	3.16015	5.34726	1.0697	1e-06	6.2e-05	up	coding	348
206877_at	MXD1	NM_001202513	MAX dimerization protein 1	7.55875	6.72805	5.52814	1.77855	1e-06	6.3e-05	up	coding	349
223266_at	STRADB	NM_001206864	STE20-related kinase adaptor beta	9.12731	8.33518	5.33926	1.73163	1e-06	6.3e-05	up	coding	350
212021_s_at	MKI67	NM_001145966	antigen identified by monoclonal antibody Ki-67	7.52767	6.86518	5.70525	1.58281	1e-06	6.3e-05	up	coding	351
1555088_x_at	STAT5B	NM_012448	signal transducer and activator of transcription 5B	8.38594	8.86222	-5.84487	-1.39115	1e-06	6.4e-05	down	coding	352
236641_at	KIF14	NM_014875	kinesin family member 14	4.60026	4.20461	5.32895	1.31554	1e-06	6.4e-05	up	coding	353
235956_at	KIAA1377	NM_020802	KIAA1377	5.11826	5.50968	-5.96621	-1.31169	1e-06	6.4e-05	down	coding	354
218864_at	TNS1	NM_022648	tensin 1	6.09384	5.48325	5.29922	1.52688	1e-06	6.5e-05	up	coding	355
239205_s_at	CR1	NM_000573	complement component (3b/4b) receptor 1 (Knops blood group)	7.51865	6.94275	5.47666	1.4906	1e-06	6.5e-05	up	coding	356
1557165_s_at	KLHL18	NM_025010	kelch-like family member 18	7.83727	7.40453	5.68321	1.3498	1e-06	6.5e-05	up	coding	357
212826_s_at	SLC25A6	NM_001636	solute carrier family 25 (mitochondrial carrier; adenine nucleotide translocator), member 6	12.1423	12.3856	-5.36497	-1.18374	1e-06	6.5e-05	down	coding	358
213906_at	MYBL1	NM_001080416	v-myb myeloblastosis viral oncogene homolog (avian)-like 1	7.19048	8.29467	-5.59563	-2.14979	1e-06	6.6e-05	down	coding	359
226370_at	KLHL15	NM_030624	kelch-like family member 15	8.2854	7.53584	5.71814	1.68128	1e-06	6.6e-05	up	coding	360
204720_s_at	DNAJC6	NM_001256864	DnaJ (Hsp40) homolog, subfamily C, member 6	4.70235	4.10888	5.32103	1.50887	1e-06	6.6e-05	up	coding	361
238478_at	BNC2	NM_017637	basonuclin 2	4.85633	5.40741	-6.27933	-1.46518	1e-06	6.6e-05	down	coding	362
244519_at	ASXL1	NM_001164603	additional sex combs like 1 (Drosophila)	8.05601	7.5063	5.58104	1.46379	1e-06	6.6e-05	up	coding	363
1558304_s_at	TSEN54	NM_207346	tRNA splicing endonuclease 54 homolog (S. cerevisiae)	8.58761	8.95945	-5.66518	-1.29399	1e-06	6.6e-05	down	coding	364
224905_at	WDR26	NM_001115113	WD repeat domain 26	9.2207	8.87083	5.55289	1.27445	1e-06	6.6e-05	up	coding	365
64488_at	IRGQ	NM_001007561	immunity-related GTPase family, Q	7.61181	7.28636	5.46206	1.25305	1e-06	6.6e-05	up	coding	366
212023_s_at	MKI67	NM_001145966	antigen identified by monoclonal antibody Ki-67	6.23619	5.73541	5.52119	1.41497	1e-06	6.7e-05	up	coding	367
224164_at	TPM3	NM_001043351	tropomyosin 3	7.28272	6.48012	5.79744	1.74424	1e-06	6.8e-05	up	coding	368
210233_at	IL1RAP	NM_001167928	interleukin 1 receptor accessory protein	4.56235	4.16247	5.32621	1.3194	1e-06	6.8e-05	up	coding	369
223558_at	INIP	NM_021218	INTS3 and NABP interacting protein	6.51513	6.8574	-5.74762	-1.26775	1e-06	6.8e-05	down	coding	370
204614_at	SERPINB2	NM_001143818	serpin peptidase inhibitor, clade B (ovalbumin), member 2	6.68143	5.06455	5.41413	3.06712	1e-06	6.9e-05	up	coding	371
218708_at	NXT1	NM_013248	NTF2-like export factor 1	9.68655	8.97901	5.59539	1.63302	1e-06	6.9e-05	up	coding	372
205291_at	IL2RB	NM_000878	interleukin 2 receptor, beta	10.2664	10.9062	-5.39007	-1.55819	1e-06	6.9e-05	down	coding	373
238509_at	CUL1	NM_003592	cullin 1	8.5253	7.91114	5.41751	1.53067	1e-06	6.9e-05	up	coding	374
213852_at	RBM8A	NM_005105	RNA binding motif protein 8A	9.16376	9.58775	-5.51423	-1.34163	1e-06	6.9e-05	down	coding	375
218023_s_at	FAM53C	NM_001135647	family with sequence similarity 53, member C	8.95805	8.5888	5.65128	1.29167	1e-06	6.9e-05	up	coding	376
225824_at	CCNK	NM_001099402	cyclin K	9.99902	9.64078	5.7633	1.28186	1e-06	6.9e-05	up	coding	377
211072_x_at	TUBA1B	NM_006082	tubulin, alpha 1b	12.5978	12.3559	5.35182	1.18256	1e-06	6.9e-05	up	coding	378
214394_x_at	EEF1D	NM_001130053	eukaryotic translation elongation factor 1 delta (guanine nucleotide exchange protein)	12.7852	12.9613	-5.30898	-1.12978	1e-06	6.9e-05	down	coding	379
230464_at	S1PR5	NM_001166215	sphingosine-1-phosphate receptor 5	8.29786	9.06517	-5.5257	-1.70209	1e-06	7e-05	down	coding	380
212259_s_at	PBXIP1	NM_020524	pre-B-cell leukemia homeobox interacting protein 1	9.1965	9.68516	-5.62745	-1.40314	1e-06	7e-05	down	coding	381
224376_s_at	C20orf24	NM_001199534	chromosome 20 open reading frame 24	11.1088	10.7449	5.65755	1.28691	1e-06	7.1e-05	up	coding	382
1553736_at	ZFC3H1	NM_144982	zinc finger, C3H1-type containing	5.269	4.76355	5.36808	1.41957	1e-06	7.2e-05	up	coding	383
217807_s_at	GLTSCR2	NM_015710	glioma tumor suppressor candidate region gene 2	13.0955	13.4025	-5.40752	-1.23715	1e-06	7.2e-05	down	coding	384
235435_at	AASDH	NM_181806	aminoadipate-semialdehyde dehydrogenase	6.8317	7.56518	-5.73907	-1.66264	1e-06	7.3e-05	down	coding	385
203413_at	NELL2	NM_001145107	NEL-like 2 (chicken)	9.54495	10.1783	-5.50373	-1.55119	1e-06	7.3e-05	down	coding	386
201200_at	CREG1	NM_003851	cellular repressor of E1A-stimulated genes 1	10.2962	9.69925	5.50429	1.51252	1e-06	7.4e-05	up	coding	387
231600_at	CLEC12B	NM_001129998	C-type lectin domain family 12, member B	5.37502	4.78816	5.3869	1.50198	1e-06	7.4e-05	up	coding	388
200815_s_at	PAFAH1B1	NM_000430	platelet-activating factor acetylhydrolase 1b, regulatory subunit 1 (45kDa)	8.89909	8.35394	6.08275	1.45917	1e-06	7.5e-05	up	coding	389
213008_at	FANCI	NM_001113378	Fanconi anemia, complementation group I	7.06468	6.58459	5.74644	1.39483	1e-06	7.5e-05	up	coding	390
207801_s_at	RNF10	NM_014868	ring finger protein 10	9.98523	9.48204	5.27198	1.41735	1e-06	7.6e-05	up	coding	391
200650_s_at	LDHA	NM_001135239	lactate dehydrogenase A	12.24	11.858	5.83351	1.3031	1e-06	7.6e-05	up	coding	392
216032_s_at	ERGIC3	NM_015966	ERGIC and golgi 3	9.75618	10.0431	-5.37654	-1.22007	1e-06	7.6e-05	down	coding	393
214575_s_at	AZU1	NM_001700	azurocidin 1	7.50899	6.50796	5.34588	2.00144	1e-06	7.7e-05	up	coding	394
1556608_a_at	EHD4	NM_139265	EH-domain containing 4	6.68831	6.13003	5.50101	1.47251	1e-06	7.7e-05	up	coding	395
225231_at	CBL	NM_005188	Cbl proto-oncogene, E3 ubiquitin protein ligase	9.25019	9.59725	-5.32997	-1.27197	1e-06	7.7e-05	down	coding	396
203214_x_at	CDK1	NM_001130829	cyclin-dependent kinase 1	6.9007	6.2519	5.72635	1.56786	1e-06	7.8e-05	up	coding	397
228181_at	SLC30A1	NM_021194	solute carrier family 30 (zinc transporter), member 1	7.89231	6.91981	5.75332	1.96223	1e-06	8.1e-05	up	coding	398
203936_s_at	MMP9	NM_004994	matrix metallopeptidase 9 (gelatinase B, 92kDa gelatinase, 92kDa type IV collagenase)	7.55513	6.68316	5.21872	1.83016	1e-06	8.1e-05	up	coding	399
219316_s_at	FLVCR2	NM_001195283	feline leukemia virus subgroup C cellular receptor family, member 2	7.63695	6.97361	5.49848	1.58374	1e-06	8.1e-05	up	coding	400
226796_at	ABHD15	NM_198147	abhydrolase domain containing 15	7.30514	7.93444	-5.83383	-1.54681	1e-06	8.1e-05	down	coding	401
223552_at	LRRC4	NM_022143	leucine rich repeat containing 4	7.32253	6.98315	5.43222	1.26521	1e-06	8.1e-05	up	coding	402
218495_at	UXT	NM_004182	ubiquitously-expressed, prefoldin-like chaperone	11.0989	11.4317	-5.40035	-1.25951	1e-06	8.1e-05	down	coding	403
1561895_at	---	---	---	3.5689	3.43063	5.48575	1.10059	1e-06	8.4e-05	up	coding	404
209091_s_at	SH3GLB1	NM_001206651	SH3-domain GRB2-like endophilin B1	10.1738	9.72188	5.59447	1.36789	1e-06	8.8e-05	up	coding	405
211702_s_at	USP32	NM_032582	ubiquitin specific peptidase 32	7.282	6.97225	5.29989	1.23949	1e-06	8.8e-05	up	coding	406
200023_s_at	EIF3F	NM_003754	eukaryotic translation initiation factor 3, subunit F	12.0345	12.343	-5.29009	-1.23842	1e-06	8.8e-05	down	coding	407
219590_x_at	DPH5	NM_001077394	diphthamide biosynthesis 5	9.7542	9.99439	-5.34018	-1.18115	1e-06	8.8e-05	down	coding	408
221877_at	IRGQ	NM_001007561	immunity-related GTPase family, Q	8.4118	8.03744	5.62391	1.29627	1e-06	8.9e-05	up	coding	409
223770_x_at	MRI1	NM_001031727	methylthioribose-1-phosphate isomerase 1	7.91705	8.19793	-5.50488	-1.21494	1e-06	8.9e-05	down	coding	410
204692_at	LRCH4	NM_001168682	leucine-rich repeats and calponin homology (CH) domain containing 4	8.61921	8.86313	-5.30392	-1.1842	1e-06	8.9e-05	down	coding	411
204467_s_at	SNCA	NM_000345	synuclein, alpha (non A4 component of amyloid precursor)	8.515	7.42185	5.19363	2.13339	1e-06	9.1e-05	up	coding	412
227232_at	EVL	NM_016337	Enah/Vasp-like	8.97579	9.80265	-5.71287	-1.77382	1e-06	9.1e-05	down	coding	413
216833_x_at	GYPB	NM_002100	glycophorin B (MNS blood group)	7.09083	6.42879	5.19408	1.58232	1e-06	9.1e-05	up	coding	414
202954_at	UBE2C	NM_007019	ubiquitin-conjugating enzyme E2C	7.94653	7.40396	5.57932	1.45657	1e-06	9.1e-05	up	coding	415
236787_at	AC017002.1	---	NULL	5.63175	5.3456	5.38086	1.21938	1e-06	9.1e-05	up	coding	416
208929_x_at	RPL13	NM_000977	ribosomal protein L13	13.7032	13.8993	-5.24932	-1.14561	1e-06	9.1e-05	down	coding	417
228518_at	IGHG1	---	immunoglobulin heavy constant gamma 1 (G1m marker)	6.78517	7.73994	-5.98203	-1.93827	1e-06	9.3e-05	down	coding	418
202974_at	MPP1	NM_001166460	membrane protein, palmitoylated 1, 55kDa	10.2194	9.40946	5.56147	1.75309	1e-06	9.3e-05	up	coding	419
206170_at	ADRB2	NM_000024	adrenoceptor beta 2, surface	7.21166	8.09037	-5.61596	-1.83873	1e-06	9.4e-05	down	coding	420
219093_at	PID1	NM_001100818	phosphotyrosine interaction domain containing 1	6.25469	7.11671	-5.46884	-1.81759	1e-06	9.4e-05	down	coding	421
201695_s_at	PNP	NM_000270	purine nucleoside phosphorylase	9.33889	8.55424	5.60825	1.72267	1e-06	9.4e-05	up	coding	422
1555279_at	ARMC8	NM_001267041	armadillo repeat containing 8	5.63256	5.03883	5.51154	1.50914	1e-06	9.4e-05	up	coding	423
202071_at	SDC4	NM_002999	syndecan 4	6.74747	6.20591	5.20681	1.45554	1e-06	9.4e-05	up	coding	424
201453_x_at	RHEB	NM_005614	Ras homolog enriched in brain	10.492	10.06	5.89706	1.34915	1e-06	9.4e-05	up	coding	425
234725_s_at	SEMA4B	NM_020210	sema domain, immunoglobulin domain (Ig), transmembrane domain (TM) and short cytoplasmic domain, (semaphorin) 4B	8.7591	9.18457	-5.60946	-1.34301	1e-06	9.4e-05	down	coding	426
224225_s_at	ETV7	NM_001207035	ets variant 7	4.17769	3.81477	5.18421	1.28603	1e-06	9.4e-05	up	coding	427
226702_at	CMPK2	NM_001256477	cytidine monophosphate (UMP-CMP) kinase 2, mitochondrial	10.1962	8.67123	5.67789	2.87771	1e-06	9.6e-05	up	coding	428
209498_at	CEACAM1	NM_001024912	carcinoembryonic antigen-related cell adhesion molecule 1 (biliary glycoprotein)	6.9939	6.15418	5.17008	1.78971	1e-06	9.6e-05	up	coding	429
200669_s_at	UBE2D3	NM_003340	ubiquitin-conjugating enzyme E2D 3	11.3025	11.0123	5.42061	1.22282	1e-06	9.6e-05	up	coding	430
202503_s_at	KIAA0101	NM_001029989	KIAA0101	9.50312	8.36857	5.83275	2.19551	1e-06	9.8e-05	up	coding	431
1552552_s_at	CLEC4C	NM_130441	C-type lectin domain family 4, member C	5.01093	5.80627	-6.02094	-1.73549	1e-06	9.8e-05	down	coding	432
229814_at	---	---	---	7.39485	7.787	-5.28078	-1.31234	1e-06	9.8e-05	down	coding	433
228468_at	MASTL	NM_001172303	microtubule associated serine/threonine kinase-like	6.83213	6.11134	5.44069	1.64809	1e-06	9.9e-05	up	coding	434
204924_at	TLR2	NM_003264	toll-like receptor 2	9.9408	9.2223	5.42706	1.64547	1e-06	9.9e-05	up	coding	435
214438_at	HLX	NM_021958	H2.0-like homeobox	7.82993	7.25573	5.30481	1.48885	1e-06	9.9e-05	up	coding	436
221485_at	B4GALT5	NM_004776	UDP-Gal:betaGlcNAc beta 1,4- galactosyltransferase, polypeptide 5	8.83666	8.11009	5.50691	1.6547	1e-06	0.000101	up	coding	437
208961_s_at	KLF6	NM_001008490	Kruppel-like factor 6	11.3433	10.8006	5.5082	1.45671	1e-06	0.000101	up	coding	438
210592_s_at	SAT1	NM_002970	spermidine/spermine N1-acetyltransferase 1	12.5201	12.029	5.53331	1.40555	1e-06	0.000101	up	coding	439
203140_at	BCL6	NM_001130845	B-cell CLL/lymphoma 6	10.8014	10.1937	5.42005	1.52381	1e-06	0.000102	up	coding	440
206359_at	SOCS3	NM_003955	suppressor of cytokine signaling 3	8.18806	7.62033	5.31655	1.48219	1e-06	0.000102	up	coding	441
201221_s_at	SNRNP70	NM_001009820	small nuclear ribonucleoprotein 70kDa (U1)	9.506	9.84295	-5.20046	-1.26309	1e-06	0.000102	down	coding	442
209803_s_at	PHLDA2	NM_003311	pleckstrin homology-like domain, family A, member 2	6.56151	4.92856	5.58605	3.10148	1e-06	0.000104	up	coding	443
243492_at	THEM4	NM_053055	thioesterase superfamily member 4	6.29429	6.98667	-5.87649	-1.61595	1e-06	0.000104	down	coding	444
200832_s_at	SCD	NM_005063	stearoyl-CoA desaturase (delta-9-desaturase)	7.19547	6.52164	5.62561	1.59529	1e-06	0.000104	up	coding	445
212191_x_at	RPL13	NM_000977	ribosomal protein L13	13.4838	13.7358	-5.18989	-1.19089	1e-06	0.000104	down	coding	446
209815_at	PTCH1	NM_000264	patched 1	5.73965	6.71152	-6.03443	-1.96138	1e-06	0.000106	down	coding	447
1552772_at	CLEC4D	NM_080387	C-type lectin domain family 4, member D	7.68975	6.99333	5.36971	1.62048	1e-06	0.000106	up	coding	448
210542_s_at	SLCO3A1	NM_001145044	solute carrier organic anion transporter family, member 3A1	8.17242	7.78374	5.68683	1.3092	1e-06	0.000106	up	coding	449
240552_at	---	---	---	5.53943	5.29339	5.40795	1.18595	1e-06	0.000106	up	coding	450
214042_s_at	RPL22	NM_000983	ribosomal protein L22	11.6038	11.9453	-5.29785	-1.26709	1e-06	0.000108	down	coding	451
227309_at	YOD1	NM_001276320	YOD1 deubiquitinase	8.80135	7.93311	5.37903	1.82545	1e-06	0.000109	up	coding	452
218399_s_at	CDCA4	NM_017955	cell division cycle associated 4	8.4574	8.02011	5.41096	1.35406	2e-06	0.000111	up	coding	453
236555_at	TRAF3IP2-AS1	NR_034108	TRAF3IP2 antisense RNA 1	5.66287	5.45617	5.34668	1.15405	2e-06	0.000111	up	coding	454
202154_x_at	TUBB3	NM_001197181	tubulin, beta 3 class III	8.98702	8.4916	5.61735	1.40973	2e-06	0.000112	up	coding	455
224645_at	EIF4EBP2	NM_004096	eukaryotic translation initiation factor 4E binding protein 2	7.47355	7.94103	-5.70744	-1.3827	2e-06	0.000113	down	coding	456
211424_x_at	METTL7A	NM_014033	methyltransferase like 7A	5.78179	6.10842	-5.51052	-1.25409	2e-06	0.000113	down	coding	457
225612_s_at	B3GNT5	NM_032047	UDP-GlcNAc:betaGal beta-1,3-N-acetylglucosaminyltransferase 5	7.75671	6.48218	5.37882	2.41921	2e-06	0.000115	up	coding	458
1554131_at	CCSER2	NM_018999	coiled-coil serine-rich protein 2	3.74189	3.52716	5.16362	1.16048	2e-06	0.000115	up	coding	459
205548_s_at	BTG3	NM_001130914	BTG family, member 3	8.52234	7.60498	5.41329	1.88865	2e-06	0.000117	up	coding	460
219062_s_at	ZCCHC2	NM_017742	zinc finger, CCHC domain containing 2	8.9955	8.24623	5.41932	1.68095	2e-06	0.000117	up	coding	461
220615_s_at	FAR2	NM_001271783	fatty acyl CoA reductase 2	7.95174	7.24037	5.23935	1.63736	2e-06	0.000117	up	coding	462
1552497_a_at	SLAMF6	NM_001184714	SLAM family member 6	8.84325	9.47997	-5.59608	-1.55478	2e-06	0.000117	down	coding	463
211370_s_at	MAP2K5	NM_001206804	mitogen-activated protein kinase kinase 5	7.20197	7.53607	-5.40946	-1.26059	2e-06	0.000117	down	coding	464
200716_x_at	RPL13A	NM_001270491	ribosomal protein L13a	14.0476	14.1938	-5.44649	-1.10661	2e-06	0.000117	down	coding	465
202430_s_at	PLSCR1	NM_021105	phospholipid scramblase 1	9.82819	8.93001	5.42278	1.86371	2e-06	0.000118	up	coding	466
204415_at	IFI6	NM_002038	interferon, alpha-inducible protein 6	9.23918	8.22149	5.3658	2.02467	2e-06	0.000119	up	coding	467
204105_s_at	NRCAM	NM_001037132	neuronal cell adhesion molecule	5.18523	5.70202	-6.00799	-1.43076	2e-06	0.00012	down	coding	468
205495_s_at	GNLY	NM_006433	granulysin	11.0534	11.9086	-5.16903	-1.80899	2e-06	0.000122	down	coding	469
204466_s_at	SNCA	NM_000345	synuclein, alpha (non A4 component of amyloid precursor)	9.96145	8.60463	5.19518	2.56121	2e-06	0.000123	up	coding	470
217897_at	FXYD6	NM_001164831	FXYD domain containing ion transport regulator 6	7.74159	7.25718	5.32184	1.39901	2e-06	0.000123	up	coding	471
227212_s_at	PHF19	NM_001009936	PHD finger protein 19	8.29698	7.85857	5.40771	1.35511	2e-06	0.000123	up	coding	472
205452_at	PIGB	NM_004855	phosphatidylinositol glycan anchor biosynthesis, class B	8.22993	7.87645	5.41108	1.27764	2e-06	0.000124	up	coding	473
200057_s_at	NONO	NM_001145408	non-POU domain containing, octamer-binding	11.7991	12.0018	-5.08063	-1.15085	2e-06	0.000124	down	coding	474
210232_at	CDC42	NM_001039802	cell division cycle 42	7.42493	6.542	5.43537	1.84412	2e-06	0.000125	up	coding	475
232891_at	SIRPD	NM_178460	signal-regulatory protein delta	7.28927	7.00186	5.09559	1.22044	2e-06	0.000125	up	coding	476
221279_at	GDAP1	NM_001040875	ganglioside induced differentiation associated protein 1	5.28441	5.01944	5.27165	1.20161	2e-06	0.000125	up	coding	477
240102_at	---	---	---	8.01942	8.54242	-5.34728	-1.43694	2e-06	0.000127	down	coding	478
240964_at	---	---	---	4.91901	4.6046	5.23102	1.2435	2e-06	0.000127	up	coding	479
221345_at	FFAR2	NM_005306	free fatty acid receptor 2	7.28594	6.34442	5.24228	1.92055	2e-06	0.000129	up	coding	480
203107_x_at	RPS2	NM_002952	ribosomal protein S2	13.9492	14.0635	-5.09004	-1.08246	2e-06	0.00013	down	coding	481
205389_s_at	ANK1	NM_000037	ankyrin 1, erythrocytic	5.63425	5.04001	5.06344	1.50968	2e-06	0.000131	up	coding	482
229881_at	KLF12	NM_007249	Kruppel-like factor 12	7.28861	8.10496	-5.82314	-1.76095	2e-06	0.000132	down	coding	483
239108_at	FAR2	NM_001271783	fatty acyl CoA reductase 2	6.91283	6.2304	5.14217	1.60485	2e-06	0.000132	up	coding	484
217748_at	ADIPOR1	NM_001127687	adiponectin receptor 1	10.1404	9.48992	5.18298	1.56967	2e-06	0.000132	up	coding	485
209218_at	SQLE	NM_003129	squalene epoxidase	7.76063	7.13331	5.51857	1.54469	2e-06	0.000132	up	coding	486
228987_at	FAM49B	NM_001256763	family with sequence similarity 49, member B	7.76216	8.22047	-5.17912	-1.37393	2e-06	0.000132	down	coding	487
225266_at	ZNF652	NM_001145365	zinc finger protein 652	8.94654	9.28153	-5.47054	-1.26137	2e-06	0.000132	down	coding	488
205627_at	CDA	NM_001785	cytidine deaminase	8.85986	8.18367	5.27152	1.59791	2e-06	0.000133	up	coding	489
1555691_a_at	KLRC4-KLRK1	NM_001199805	KLRC4-KLRK1 readthrough	9.43428	10.2409	-5.25532	-1.74907	2e-06	0.000137	down	coding	490
219895_at	TMEM255A	NM_001104544	transmembrane protein 255A	4.25823	3.6214	5.06404	1.55491	2e-06	0.000137	up	coding	491
219458_s_at	NSUN3	NM_022072	NOP2/Sun domain family, member 3	7.92968	7.47371	5.10606	1.3717	2e-06	0.000137	up	coding	492
215823_x_at	PABPC1	NM_002568	poly(A) binding protein, cytoplasmic 1	12.5238	12.792	-5.05809	-1.20429	2e-06	0.000137	down	coding	493
224930_x_at	RPL7A	NM_000972	ribosomal protein L7a	13.4706	13.6725	-5.05856	-1.15019	2e-06	0.000137	down	coding	494
223013_at	TBL1XR1	NM_024665	transducin (beta)-like 1 X-linked receptor 1	10.0647	10.4439	-5.17587	-1.30067	2e-06	0.000138	down	coding	495
209118_s_at	TUBA1A	NM_001270399	tubulin, alpha 1a	12.0745	11.7014	5.26719	1.29517	2e-06	0.00014	up	coding	496
200022_at	RPL18	NM_000979	ribosomal protein L18	13.4602	13.6633	-5.08683	-1.15122	2e-06	0.00014	down	coding	497
240265_at	TRAF3IP3	NM_025228	TRAF3 interacting protein 3	6.4919	7.83197	-5.62021	-2.53164	2e-06	0.000142	down	coding	498
205349_at	GNA15	NM_002068	guanine nucleotide binding protein (G protein), alpha 15 (Gq class)	8.39022	7.66427	5.39771	1.654	2e-06	0.000142	up	coding	499
215984_s_at	ARFRP1	NM_001134758	ADP-ribosylation factor related protein 1	7.36182	7.72251	-5.33961	-1.28404	2e-06	0.000142	down	coding	500
216380_x_at	GS1-111G14.1	---	NULL	9.94836	10.2379	-5.3092	-1.22226	2e-06	0.000142	down	coding	501
228069_at	MTFR2	NM_001099286	mitochondrial fission regulator 2	6.18151	5.59773	5.41422	1.49877	2e-06	0.000144	up	coding	502
207071_s_at	ACO1	NM_001278352	aconitase 1, soluble	6.38938	6.73049	-5.53957	-1.26673	2e-06	0.000144	down	coding	503
206247_at	MICB	NM_005931	MHC class I polypeptide-related sequence B	9.08958	8.60157	5.34616	1.40251	2e-06	0.000148	up	coding	504
212141_at	MCM4	NM_005914	minichromosome maintenance complex component 4	7.28325	6.84739	5.3553	1.35273	2e-06	0.000148	up	coding	505
225834_at	FAM72A	NM_001100910	family with sequence similarity 72, member A	7.21455	6.44706	5.37173	1.70231	2e-06	0.000149	up	coding	506
1554053_at	SPTLC1	NM_006415	serine palmitoyltransferase, long chain base subunit 1	5.28379	4.88151	5.19942	1.3216	2e-06	0.000149	up	coding	507
231093_at	FCRL3	NM_001024667	Fc receptor-like 3	9.15965	10.0824	-5.53498	-1.89576	2e-06	0.000151	down	coding	508
212956_at	TBC1D9	NM_015130	TBC1 domain family, member 9 (with GRAM domain)	8.39056	9.06389	-5.21838	-1.59474	2e-06	0.000153	down	coding	509
224920_x_at	MYADM	NM_001020818	myeloid-associated differentiation marker	8.85299	8.2856	5.48826	1.48184	2e-06	0.000153	up	coding	510
212859_x_at	MT1E	NM_175617	metallothionein 1E	9.46276	8.82896	5.24333	1.55165	2e-06	0.000154	up	coding	511
212020_s_at	MKI67	NM_001145966	antigen identified by monoclonal antibody Ki-67	6.75502	6.2714	5.20874	1.39824	2e-06	0.000154	up	coding	512
212332_at	RBL2	NM_005611	retinoblastoma-like 2 (p130)	9.06301	9.75178	-5.38974	-1.61191	2e-06	0.000156	down	coding	513
239210_at	OTTHUMG00000184145	---	NULL	3.95811	3.56809	5.03113	1.31041	2e-06	0.000156	up	coding	514
224790_at	ASAP1	NM_001247996	ArfGAP with SH3 domain, ankyrin repeat and PH domain 1	9.12199	8.73668	5.46035	1.30614	2e-06	0.000156	up	coding	515
230480_at	PIWIL4	NM_152431	piwi-like RNA-mediated gene silencing 4	6.76134	6.31407	5.22264	1.36346	2e-06	0.000159	up	coding	516
210144_at	TBC1D22A	NM_014346	TBC1 domain family, member 22A	7.12282	7.49763	-5.37564	-1.29668	2e-06	0.000159	down	coding	517
1555486_a_at	PRR5L	NM_001160167	proline rich 5 like	6.94638	7.4542	-5.39332	-1.4219	3e-06	0.00016	down	coding	518
238802_at	TYSND1	NM_001040273	trypsin domain containing 1	6.09502	6.41994	-5.19444	-1.2526	3e-06	0.000162	down	coding	519
205681_at	BCL2A1	NM_001114735	BCL2-related protein A1	11.0134	10.093	5.32655	1.89265	3e-06	0.000163	up	coding	520
242281_at	GLUL	NM_001033044	glutamate-ammonia ligase	5.27987	4.92234	5.29424	1.28123	3e-06	0.000163	up	coding	521
204444_at	KIF11	NM_004523	kinesin family member 11	5.75196	4.94251	5.11906	1.75254	3e-06	0.000164	up	coding	522
223381_at	NUF2	NM_031423	NUF2, NDC80 kinetochore complex component, homolog (S. cerevisiae)	5.24678	4.53835	5.18546	1.63402	3e-06	0.000164	up	coding	523
210504_at	KLF1	NM_006563	Kruppel-like factor 1 (erythroid)	6.35237	5.67938	5.01276	1.59437	3e-06	0.000164	up	coding	524
210052_s_at	TPX2	NM_012112	TPX2, microtubule-associated, homolog (Xenopus laevis)	6.91979	6.26354	5.31811	1.57598	3e-06	0.000164	up	coding	525
210313_at	LILRA4	NM_012276	leukocyte immunoglobulin-like receptor, subfamily A (with TM domain), member 4	7.45757	8.02856	-5.90442	-1.48555	3e-06	0.000164	down	coding	526
224864_at	SRA1	NM_001035235	steroid receptor RNA activator 1	8.94124	8.56689	5.35164	1.29626	3e-06	0.000164	up	coding	527
1553681_a_at	PRF1	NM_001083116	perforin 1 (pore forming protein)	9.72454	10.5194	-5.15799	-1.73487	3e-06	0.000166	down	coding	528
219111_s_at	DDX54	NM_001111322	DEAD (Asp-Glu-Ala-Asp) box polypeptide 54	7.42821	7.62977	-5.22666	-1.14994	3e-06	0.000166	down	coding	529
221011_s_at	LBH	NM_030915	limb bud and heart development	9.53534	10.2175	-5.13167	-1.60452	3e-06	0.000167	down	coding	530
213843_x_at	SLC6A8	NM_001142805	solute carrier family 6 (neurotransmitter transporter, creatine), member 8	6.37388	5.8551	5.02122	1.43274	3e-06	0.000167	up	coding	531
241801_at	PGAP1	NM_024989	post-GPI attachment to proteins 1	4.29144	3.91324	5.03365	1.29972	3e-06	0.000167	up	coding	532
227958_s_at	GSN	NM_000177	gelsolin	5.08266	4.74048	5.13794	1.26767	3e-06	0.000167	up	coding	533
226648_at	HIF1AN	NM_017902	hypoxia inducible factor 1, alpha subunit inhibitor	7.94584	8.44208	-5.29723	-1.41054	3e-06	0.000168	down	coding	534
200648_s_at	GLUL	NM_001033044	glutamate-ammonia ligase	10.0622	9.18118	5.4016	1.84169	3e-06	0.000169	up	coding	535
230872_s_at	ARPC4-TTLL3	NM_001025930	ARPC4-TTLL3 readthrough	6.60773	6.90646	-5.0557	-1.23006	3e-06	0.000169	down	coding	536
32069_at	N4BP1	NM_153029	NEDD4 binding protein 1	9.04222	8.57709	5.37357	1.38044	3e-06	0.00017	up	coding	537
241419_at	ARHGAP1	NM_004308	Rho GTPase activating protein 1	6.92012	7.26839	-5.58825	-1.27304	3e-06	0.000172	down	coding	538
222680_s_at	DTL	NM_016448	denticleless E3 ubiquitin protein ligase homolog (Drosophila)	6.52456	5.71807	5.3576	1.74895	3e-06	0.000173	up	coding	539
203167_at	TIMP2	NM_003255	TIMP metallopeptidase inhibitor 2	8.75621	8.20549	5.2153	1.46481	3e-06	0.000173	up	coding	540
58916_at	KCTD14	NM_001203260	potassium channel tetramerisation domain containing 14	4.4561	4.0787	4.97022	1.299	3e-06	0.000174	up	coding	541
224891_at	FOXO3	NM_001455	forkhead box O3	10.3441	9.7881	5.17635	1.47023	3e-06	0.000175	up	coding	542
206145_at	RHAG	NM_000324	Rh-associated glycoprotein	3.9749	3.49184	4.99558	1.3977	3e-06	0.000175	up	coding	543
209589_s_at	EPHB2	NM_004442	EPH receptor B2	6.29698	5.8078	5.49142	1.40364	3e-06	0.000176	up	coding	544
217635_s_at	POLG	NM_001126131	polymerase (DNA directed), gamma	7.54472	7.85634	-5.45107	-1.2411	3e-06	0.000183	down	coding	545
204152_s_at	MFNG	NM_001166343	MFNG O-fucosylpeptide 3-beta-N-acetylglucosaminyltransferase	8.48578	8.98804	-5.15339	-1.41643	3e-06	0.000185	down	coding	546
236901_at	---	---	---	4.58598	4.28016	5.01817	1.23612	3e-06	0.000185	up	coding	547
218418_s_at	KANK2	NM_001136191	KN motif and ankyrin repeat domains 2	5.41823	5.04816	5.05009	1.29242	3e-06	0.000186	up	coding	548
214541_s_at	QKI	NM_006775	QKI, KH domain containing, RNA binding	5.23795	4.97549	5.35658	1.19952	3e-06	0.000187	up	coding	549
218076_s_at	ARHGAP17	NM_001006634	Rho GTPase activating protein 17	9.62773	9.9231	-5.00686	-1.2272	3e-06	0.000188	down	coding	550
212790_x_at	RPL13A	NM_001270491	ribosomal protein L13a	14.0823	14.2112	-5.20637	-1.09346	3e-06	0.000188	down	coding	551
212479_s_at	RMND5A	NM_022780	required for meiotic nuclear division 5 homolog A (S. cerevisiae)	8.77177	8.30808	5.08731	1.37907	3e-06	0.000191	up	coding	552
219211_at	USP18	NM_017414	ubiquitin specific peptidase 18	8.17178	7.04621	5.23451	2.18188	3e-06	0.000194	up	coding	553
208632_at	RNF10	NM_014868	ring finger protein 10	9.55292	8.97289	5.26921	1.49488	3e-06	0.000194	up	coding	554
210854_x_at	SLC6A8	NM_001142805	solute carrier family 6 (neurotransmitter transporter, creatine), member 8	7.41317	6.93504	4.9745	1.39294	3e-06	0.000194	up	coding	555
200663_at	CD63	NM_001040034	CD63 molecule	11.2064	10.7898	5.14819	1.33484	3e-06	0.000194	up	coding	556
236081_at	SNCA	NM_000345	synuclein, alpha (non A4 component of amyloid precursor)	5.9223	5.04284	4.93119	1.83969	3e-06	0.000195	up	coding	557
220307_at	CD244	NM_001166663	CD244 molecule, natural killer cell receptor 2B4	8.25327	8.67826	-5.05488	-1.34257	3e-06	0.000195	down	coding	558
226726_at	MBOAT2	NM_138799	membrane bound O-acyltransferase domain containing 2	6.59691	6.16067	4.93207	1.35307	3e-06	0.000196	up	coding	559
1570432_at	---	---	---	5.88909	5.47808	5.14251	1.32961	3e-06	0.000196	up	coding	560
225353_s_at	C1QC	NM_001114101	complement component 1, q subcomponent, C chain	6.70114	6.08335	4.96551	1.53452	3e-06	0.000198	up	coding	561
202912_at	ADM	NM_001124	adrenomedullin	9.42156	7.97783	5.52377	2.72024	3e-06	0.0002	up	coding	562
212949_at	NCAPH	NM_015341	non-SMC condensin I complex, subunit H	6.60407	6.14674	5.20018	1.373	3e-06	0.0002	up	coding	563
219545_at	KCTD14	NM_001203260	potassium channel tetramerisation domain containing 14	6.05431	5.64309	5.12695	1.32981	3e-06	0.0002	up	coding	564
1556283_s_at	FGFR1OP2	NM_001171887	FGFR1 oncogene partner 2	7.37289	6.57659	5.24625	1.73664	3e-06	0.000202	up	coding	565
205653_at	CTSG	NM_001911	cathepsin G	7.46467	6.65252	4.99378	1.75583	3e-06	0.000203	up	coding	566
237563_s_at	OTTHUMG00000039487	---	NULL	7.39837	6.93496	4.98863	1.3788	3e-06	0.000203	up	coding	567
241809_at	FAM212B	NM_019099	family with sequence similarity 212, member B	6.42643	6.20424	5.01439	1.1665	3e-06	0.000203	up	coding	568
214453_s_at	IFI44	NM_006417	interferon-induced protein 44	10.4803	9.05188	5.42804	2.69145	4e-06	0.000205	up	coding	569
202705_at	CCNB2	NM_004701	cyclin B2	7.65757	6.84849	5.2697	1.7521	4e-06	0.000205	up	coding	570
209882_at	RIT1	NM_001256820	Ras-like without CAAX 1	8.27964	7.76284	5.08823	1.43078	4e-06	0.000205	up	coding	571
214481_at	HIST1H2AM	NM_003514	histone cluster 1, H2am	5.44002	4.96217	5.23212	1.39267	4e-06	0.000205	up	coding	572
210004_at	OLR1	NM_001172632	oxidized low density lipoprotein (lectin-like) receptor 1	4.05352	3.61265	4.91389	1.35743	4e-06	0.000205	up	coding	573
238354_x_at	---	---	---	4.33442	4.13096	5.23153	1.15146	4e-06	0.000205	up	coding	574
1554423_a_at	FBXO7	NM_001033024	F-box protein 7	10.5609	10.1283	4.9106	1.34967	4e-06	0.000207	up	coding	575
220001_at	PADI4	NM_012387	peptidyl arginine deiminase, type IV	8.89217	8.09145	5.08456	1.74197	4e-06	0.000209	up	coding	576
237210_at	NFRKB	NM_001143835	nuclear factor related to kappaB binding protein	6.13435	5.70946	5.21217	1.34247	4e-06	0.000209	up	coding	577
36545_s_at	SFI1	NM_001007467	Sfi1 homolog, spindle assembly associated (yeast)	8.29074	8.70435	-5.00676	-1.33201	4e-06	0.000209	down	coding	578
208909_at	UQCRFS1	NM_006003	ubiquinol-cytochrome c reductase, Rieske iron-sulfur polypeptide 1	11.5505	11.2693	5.06857	1.2152	4e-06	0.000211	up	coding	579
203418_at	CCNA2	NM_001237	cyclin A2	6.0449	5.34837	5.11113	1.6206	4e-06	0.000212	up	coding	580
1562852_at	---	---	---	6.29446	5.67095	5.08075	1.54061	4e-06	0.000212	up	coding	581
1555274_a_at	EPT1	NM_033505	ethanolaminephosphotransferase 1 (CDP-ethanolamine-specific)	6.8161	6.16844	5.38554	1.56663	4e-06	0.000216	up	coding	582
219624_at	BAG4	NM_001204878	BCL2-associated athanogene 4	7.22569	6.63107	5.38637	1.51008	4e-06	0.000216	up	coding	583
220076_at	ANKH	NM_054027	ankylosis, progressive homolog (mouse)	5.08097	5.50222	-5.45997	-1.33909	4e-06	0.000217	down	coding	584
220000_at	SIGLEC5	NM_003830	sialic acid binding Ig-like lectin 5	8.5151	7.98879	5.04894	1.44023	4e-06	0.000219	up	coding	585
228433_at	NFYA	NM_002505	nuclear transcription factor Y, alpha	5.90024	6.2955	-5.21488	-1.31518	4e-06	0.000219	down	coding	586
211597_s_at	HOPX	NM_001145459	HOP homeobox	8.83366	9.57783	-5.04565	-1.67501	4e-06	0.00022	down	coding	587
223982_s_at	PNPLA8	NM_001256007	patatin-like phospholipase domain containing 8	9.60093	9.105	5.1609	1.41023	4e-06	0.000221	up	coding	588
212843_at	NCAM1	NM_000615	neural cell adhesion molecule 1	5.94601	6.73306	-5.51956	-1.72554	4e-06	0.000223	down	coding	589
220739_s_at	CNNM3	NM_017623	cyclin M3	8.16556	8.80636	-5.28348	-1.55919	4e-06	0.000223	down	coding	590
205393_s_at	CHEK1	NM_001114121	checkpoint kinase 1	5.42188	4.86377	5.07764	1.47234	4e-06	0.000223	up	coding	591
229686_at	P2RY8	NM_178129	purinergic receptor P2Y, G-protein coupled, 8	10.9652	11.2779	-4.88529	-1.24205	4e-06	0.000223	down	coding	592
205807_s_at	TUFT1	NM_001126337	tuftelin 1	6.33004	5.75774	5.11961	1.4869	4e-06	0.000224	up	coding	593
214077_x_at	MEIS3P1	NR_002211	Meis homeobox 3 pseudogene 1	6.70742	6.21469	5.24527	1.4071	4e-06	0.000225	up	coding	594
225877_at	TYSND1	NM_001040273	trypsin domain containing 1	7.0668	7.37137	-5.08145	-1.23506	4e-06	0.000225	down	coding	595
220320_at	DOK3	NM_001144875	docking protein 3	7.32826	6.93314	5.19503	1.31505	4e-06	0.000227	up	coding	596
239130_at	MIR101-1	NR_029516	microRNA 101-1	6.2338	6.89098	-5.52683	-1.577	4e-06	0.000232	down	coding	597
224719_s_at	C12orf57	NM_138425	chromosome 12 open reading frame 57	10.5929	11.0697	-5.1102	-1.3916	4e-06	0.000233	down	coding	598
200763_s_at	RPLP1	NM_001003	ribosomal protein, large, P1	13.9185	14.0228	-4.92741	-1.075	4e-06	0.000234	down	coding	599
223484_at	C15orf48	NM_032413	chromosome 15 open reading frame 48	6.37601	5.18684	4.93166	2.28021	4e-06	0.000235	up	coding	600
226543_at	BLOC1S5	NM_001199322	biogenesis of lysosomal organelles complex-1, subunit 5, muted	6.67766	7.12377	-5.26466	-1.36237	4e-06	0.000235	down	coding	601
232543_x_at	ARHGAP9	NM_001080156	Rho GTPase activating protein 9	10.3056	10.5322	-4.98412	-1.17013	4e-06	0.000235	down	coding	602
227757_at	CUL4A	NM_001008895	cullin 4A	7.70238	7.19702	5.08317	1.41948	4e-06	0.000237	up	coding	603
209782_s_at	DBP	NM_001352	D site of albumin promoter (albumin D-box) binding protein	7.50706	7.96751	-5.28799	-1.37597	4e-06	0.000237	down	coding	604
204714_s_at	F5	NM_000130	coagulation factor V (proaccelerin, labile factor)	8.19973	7.42497	5.17529	1.7109	4e-06	0.000241	up	coding	605
237441_at	---	---	---	7.0746	7.67757	-5.39799	-1.51884	4e-06	0.000242	down	coding	606
207836_s_at	RBPMS	NM_001008710	RNA binding protein with multiple splicing	5.50867	5.35589	5.15326	1.11171	4e-06	0.000242	up	coding	607
1553176_at	SH2D1B	NM_053282	SH2 domain containing 1B	5.77682	6.42299	-5.05507	-1.56501	5e-06	0.000245	down	coding	608
223599_at	TRIM6	NM_001003818	tripartite motif containing 6	4.03096	3.73569	4.85488	1.22711	5e-06	0.000245	up	coding	609
221998_s_at	VRK3	NM_001025778	vaccinia related kinase 3	9.04097	9.30929	-5.01286	-1.2044	5e-06	0.000246	down	coding	610
201105_at	LGALS1	NM_002305	lectin, galactoside-binding, soluble, 1	12.1079	11.5599	5.09492	1.46206	5e-06	0.000247	up	coding	611
239278_at	---	---	---	6.61663	7.29196	-5.50071	-1.59696	5e-06	0.000248	down	coding	612
208768_x_at	RPL22	NM_000983	ribosomal protein L22	13.0436	13.2244	-4.85951	-1.13354	5e-06	0.000248	down	coding	613
223405_at	NPL	NM_001200050	N-acetylneuraminate pyruvate lyase (dihydrodipicolinate synthase)	8.63146	8.10515	5.07153	1.44025	5e-06	0.000249	up	coding	614
224785_at	UBALD2	NM_182565	UBA-like domain containing 2	9.30651	8.93097	5.10908	1.29733	5e-06	0.000253	up	coding	615
228253_at	LOXL3	NM_032603	lysyl oxidase-like 3	7.11513	6.81721	5.00115	1.22937	5e-06	0.000256	up	coding	616
239122_at	---	---	---	8.66233	9.18572	-5.47055	-1.43733	5e-06	0.00026	down	coding	617
242625_at	RSAD2	NM_080657	radical S-adenosyl methionine domain containing 2	9.16011	7.47146	5.20432	3.22355	5e-06	0.000262	up	coding	618
212723_at	JMJD6	NM_001081461	jumonji domain containing 6	9.58276	8.97839	5.24696	1.52031	5e-06	0.000265	up	coding	619
222043_at	CLU	NM_001831	clusterin	5.44796	4.90818	4.94746	1.45375	5e-06	0.000265	up	coding	620
1560762_at	LOC285972	NR_034033	uncharacterized LOC285972	4.31226	4.70017	-5.42554	-1.30849	5e-06	0.000265	down	coding	621
212321_at	SGPL1	NM_003901	sphingosine-1-phosphate lyase 1	7.47968	7.79621	-5.09992	-1.24533	5e-06	0.000265	down	coding	622
201113_at	TUFM	NM_003321	Tu translation elongation factor, mitochondrial	9.76846	10.0733	-4.86449	-1.23526	5e-06	0.000265	down	coding	623
213263_s_at	PCBP2	NM_001098620	poly(rC) binding protein 2	9.30137	9.57873	-4.98144	-1.21198	5e-06	0.000265	down	coding	624
203249_at	EZH1	NM_001991	enhancer of zeste homolog 1 (Drosophila)	8.93999	9.21717	-5.13028	-1.21183	5e-06	0.000265	down	coding	625
60474_at	FERMT1	NM_017671	fermitin family member 1	4.08096	3.96855	5.08568	1.08103	5e-06	0.000267	up	coding	626
219023_at	AP1AR	NM_001128426	adaptor-related protein complex 1 associated regulatory protein	6.91275	7.62482	-5.15727	-1.63815	5e-06	0.000268	down	coding	627
201761_at	MTHFD2	NM_001040409	methylenetetrahydrofolate dehydrogenase (NADP+ dependent) 2, methenyltetrahydrofolate cyclohydrolase	9.75747	9.13643	5.23608	1.53798	5e-06	0.000268	up	coding	628
1555107_a_at	UVSSA	NM_020894	UV-stimulated scaffold protein A	5.50864	5.88599	-5.26062	-1.29896	5e-06	0.000269	down	coding	629
206911_at	TRIM25	NM_005082	tripartite motif containing 25	7.59741	7.34303	5.05442	1.19282	5e-06	0.000269	up	coding	630
201324_at	EMP1	NM_001423	epithelial membrane protein 1	6.08639	5.21491	4.95321	1.82954	5e-06	0.000272	up	coding	631
226066_at	MITF	NM_000248	microphthalmia-associated transcription factor	6.49594	5.90916	5.03406	1.50189	5e-06	0.000273	up	coding	632
218472_s_at	PELO	NM_015946	pelota homolog (Drosophila)	7.66136	7.0753	5.11097	1.50114	5e-06	0.000273	up	coding	633
238624_at	NLK	NM_016231	nemo-like kinase	6.30085	5.82576	5.21422	1.39001	5e-06	0.000274	up	coding	634
208858_s_at	ESYT1	NM_001184796	extended synaptotagmin-like protein 1	10.282	10.6226	-4.85707	-1.26629	5e-06	0.000274	down	coding	635
225175_s_at	SLC44A2	NM_001145056	solute carrier family 44, member 2	9.01366	9.31405	-4.90568	-1.23147	5e-06	0.000274	down	coding	636
1552258_at	LINC00152	NM_052871	long intergenic non-protein coding RNA 152	5.5998	5.38962	4.9792	1.15683	5e-06	0.000274	up	coding	637
202458_at	PRSS23	NM_007173	protease, serine, 23	6.59675	7.47701	-5.285	-1.84071	5e-06	0.000278	down	coding	638
1554860_at	PTPN7	NM_001199797	protein tyrosine phosphatase, non-receptor type 7	6.80215	6.49074	5.01555	1.24092	5e-06	0.000278	up	coding	639
201456_s_at	BUB3	NM_001007793	BUB3 mitotic checkpoint protein	9.09178	9.6342	-5.01771	-1.45641	5e-06	0.000281	down	coding	640
202087_s_at	CTSL1	NM_001257971	cathepsin L1	8.77484	8.04472	5.13335	1.65878	6e-06	0.000285	up	coding	641
228660_x_at	SEMA4F	NM_001271661	sema domain, immunoglobulin domain (Ig), transmembrane domain (TM) and short cytoplasmic domain, (semaphorin) 4F	6.76078	7.13354	-5.26102	-1.29483	6e-06	0.000285	down	coding	642
221267_s_at	ABHD17A	NM_001130111	abhydrolase domain containing 17A	10.6219	10.9867	-4.89984	-1.2877	6e-06	0.000285	down	coding	643
200026_at	RPL34	NM_000995	ribosomal protein L34	13.7256	13.9207	-5.14163	-1.14487	6e-06	0.000285	down	coding	644
208635_x_at	NACA	NM_001113201	nascent polypeptide-associated complex alpha subunit	13.3839	13.5146	-4.80407	-1.09486	6e-06	0.000285	down	coding	645
229414_at	PITPNC1	NM_012417	phosphatidylinositol transfer protein, cytoplasmic 1	6.69509	7.265	-5.21863	-1.48443	6e-06	0.000286	down	coding	646
1554316_at	PGLS	NM_012088	6-phosphogluconolactonase	7.4199	7.91538	-5.40928	-1.40979	6e-06	0.000286	down	coding	647
225748_at	LTV1	NM_032860	LTV1 homolog (S. cerevisiae)	8.51041	8.18157	5.08941	1.256	6e-06	0.000287	up	coding	648
201810_s_at	SH3BP5	NM_001018009	SH3-domain binding protein 5 (BTK-associated)	9.72529	10.2402	-5.36589	-1.42888	6e-06	0.000288	down	coding	649
203159_at	GLS	NM_001256310	glutaminase	8.11918	8.67778	-5.2546	-1.47284	6e-06	0.000289	down	coding	650
203234_at	UPP1	NM_003364	uridine phosphorylase 1	9.3865	8.84697	5.10634	1.4535	6e-06	0.000289	up	coding	651
221425_s_at	ISCA1	NM_030940	iron-sulfur cluster assembly 1 homolog (S. cerevisiae)	8.52923	7.98993	4.85309	1.45327	6e-06	0.000291	up	coding	652
236707_at	DAPP1	NM_014395	dual adaptor of phosphotyrosine and 3-phosphoinositides	6.20702	6.77415	-5.22516	-1.48158	6e-06	0.000295	down	coding	653
219922_s_at	LTBP3	NM_001130144	latent transforming growth factor beta binding protein 3	8.29362	8.83737	-4.86121	-1.45775	6e-06	0.000295	down	coding	654
200705_s_at	EEF1B2	NM_001037663	eukaryotic translation elongation factor 1 beta 2	12.8255	13.1267	-4.87698	-1.23221	6e-06	0.000295	down	coding	655
200888_s_at	RPL23	NM_000978	ribosomal protein L23	13.1637	13.4017	-4.98293	-1.17938	6e-06	0.000295	down	coding	656
242601_at	HEPACAM2	NM_001039372	HEPACAM family member 2	3.85971	3.42543	4.81513	1.35123	6e-06	0.000298	up	coding	657
204505_s_at	DMTN	NM_001114135	dematin actin binding protein	8.37536	7.59858	4.82917	1.71331	6e-06	0.000299	up	coding	658
217640_x_at	SKA1	NM_001039535	spindle and kinetochore associated complex subunit 1	4.27509	3.96388	4.90641	1.24075	6e-06	0.000301	up	coding	659
213864_s_at	NAP1L1	NM_004537	nucleosome assembly protein 1-like 1	11.9715	12.2293	-4.78493	-1.19565	6e-06	0.000301	down	coding	660
218542_at	CEP55	NM_001127182	centrosomal protein 55kDa	5.91261	5.09407	4.93862	1.76362	6e-06	0.000311	up	coding	661
203116_s_at	FECH	NM_000140	ferrochelatase	8.61432	7.93014	4.77492	1.6068	6e-06	0.000311	up	coding	662
221654_s_at	USP3	NM_001256702	ubiquitin specific peptidase 3	10.8233	10.349	5.20036	1.38918	6e-06	0.000313	up	coding	663
211999_at	H3F3A	NM_002107	H3 histone, family 3A	13.0636	12.5976	5.26474	1.38132	6e-06	0.000313	up	coding	664
229740_at	SMIM5	NM_001162995	small integral membrane protein 5	8.22009	7.63984	4.95112	1.49511	6e-06	0.000315	up	coding	665
200990_at	TRIM28	NM_005762	tripartite motif containing 28	9.88204	10.2822	-4.77045	-1.31963	6e-06	0.000315	down	coding	666
202345_s_at	FABP5	NM_001444	fatty acid binding protein 5 (psoriasis-associated)	8.57137	7.88085	5.05516	1.61387	6e-06	0.000318	up	coding	667
223398_at	C9orf89	NM_032310	chromosome 9 open reading frame 89	8.81306	8.22548	5.08653	1.50273	6e-06	0.000318	up	coding	668
213269_at	ZNF248	NM_001267597	zinc finger protein 248	6.51476	6.98374	-5.04893	-1.38413	6e-06	0.000318	down	coding	669
200963_x_at	RPL31	NM_000993	ribosomal protein L31	13.9297	14.0511	-4.77419	-1.08785	6e-06	0.000318	down	coding	670
241525_at	LOC200772	NR_033841	uncharacterized LOC200772	6.10219	7.27698	-5.65182	-2.2576	7e-06	0.000319	down	coding	671
216268_s_at	JAG1	NM_000214	jagged 1	5.01116	4.44897	4.7994	1.47651	7e-06	0.000319	up	coding	672
226271_at	GDAP1	NM_001040875	ganglioside induced differentiation associated protein 1	6.40733	6.13097	4.7846	1.21114	7e-06	0.000319	up	coding	673
200919_at	PHC2	NM_004427	polyhomeotic homolog 2 (Drosophila)	9.70638	9.44811	4.80887	1.19604	7e-06	0.000319	up	coding	674
227811_at	FGD3	NM_001083536	FYVE, RhoGEF and PH domain containing 3	10.5148	10.8224	-4.97037	-1.23765	7e-06	0.00032	down	coding	675
1564154_at	---	---	---	8.49888	8.97209	-5.14888	-1.3882	7e-06	0.000322	down	coding	676
207971_s_at	CEP68	NM_015147	centrosomal protein 68kDa	7.25797	7.6747	-5.24262	-1.3349	7e-06	0.000323	down	coding	677
231183_s_at	---	---	---	4.4605	4.25151	4.78109	1.15588	7e-06	0.000323	up	coding	678
226219_at	ARHGAP30	NM_001025598	Rho GTPase activating protein 30	11.2301	11.5257	-4.90965	-1.22742	7e-06	0.000325	down	coding	679
209129_at	TRIP6	NM_003302	thyroid hormone receptor interactor 6	6.97707	6.70634	4.96157	1.20642	7e-06	0.000325	up	coding	680
1555220_a_at	AKR1E2	NM_001040177	aldo-keto reductase family 1, member E2	4.76867	4.51562	5.11684	1.19173	7e-06	0.000325	up	coding	681
213797_at	RSAD2	NM_080657	radical S-adenosyl methionine domain containing 2	9.26165	7.90668	5.02605	2.55792	7e-06	0.000328	up	coding	682
234165_at	PTGDR	NM_000953	prostaglandin D2 receptor (DP)	5.62409	6.21762	-5.33187	-1.50893	7e-06	0.000333	down	coding	683
205003_at	DOCK4	NM_014705	dedicator of cytokinesis 4	4.62823	4.29878	4.95311	1.25654	7e-06	0.000338	up	coding	684
213134_x_at	BTG3	NM_001130914	BTG family, member 3	9.49782	8.62042	5.02844	1.83706	7e-06	0.00034	up	coding	685
221476_s_at	RPL15	NM_001253379	ribosomal protein L15	12.3349	12.5759	-4.74438	-1.18187	7e-06	0.000346	down	coding	686
231055_at	---	---	---	5.58714	5.14921	5.00581	1.35466	7e-06	0.000347	up	coding	687
203723_at	ITPKB	NM_002221	inositol-trisphosphate 3-kinase B	8.9323	9.53125	-5.03786	-1.51462	7e-06	0.000348	down	coding	688
205633_s_at	ALAS1	NM_000688	aminolevulinate, delta-, synthase 1	8.41477	7.85711	5.07034	1.47189	7e-06	0.000348	up	coding	689
222395_s_at	UBE2Z	NM_023079	ubiquitin-conjugating enzyme E2Z	9.0239	9.50819	-5.01818	-1.3989	7e-06	0.000348	down	coding	690
231234_at	CTSC	NM_001114173	cathepsin C	6.32461	6.73414	-5.11897	-1.32825	7e-06	0.000351	down	coding	691
205483_s_at	ISG15	NM_005101	ISG15 ubiquitin-like modifier	11.5056	10.4238	5.02419	2.11669	7e-06	0.000353	up	coding	692
228846_at	MXD1	NM_001202513	MAX dimerization protein 1	8.78384	7.80882	5.23637	1.96567	7e-06	0.000355	up	coding	693
206042_x_at	PAR-SN	NM_003097	paternally expressed transcript PAR-SN	9.91342	10.2635	-4.81192	-1.27466	8e-06	0.000358	down	coding	694
205931_s_at	CREB5	NM_001011666	cAMP responsive element binding protein 5	6.90943	6.25934	4.84516	1.56926	8e-06	0.000359	up	coding	695
212352_s_at	TMED10	NM_006827	transmembrane emp24-like trafficking protein 10 (yeast)	10.869	11.1892	-4.84494	-1.24856	8e-06	0.000359	down	coding	696
224441_s_at	USP45	NM_001080481	ubiquitin specific peptidase 45	4.0202	3.83244	4.77737	1.139	8e-06	0.000359	up	coding	697
1555780_a_at	RHEB	NM_005614	Ras homolog enriched in brain	8.64506	8.11805	5.08216	1.44094	8e-06	0.000365	up	coding	698
225252_at	SRXN1	NM_080725	sulfiredoxin 1	8.81136	8.11863	5.08462	1.61634	8e-06	0.000369	up	coding	699
216250_s_at	LPXN	NM_001143995	leupaxin	10.2862	10.6265	-4.7695	-1.26596	8e-06	0.000372	down	coding	700
212032_s_at	PTOV1	NM_017432	prostate tumor overexpressed 1	8.1562	8.47254	-4.76857	-1.24517	8e-06	0.000372	down	coding	701
209891_at	SPC25	NM_020675	SPC25, NDC80 kinetochore complex component	4.78503	4.16284	4.94397	1.53921	8e-06	0.000375	up	coding	702
226592_at	ZNF618	NM_001040063	zinc finger protein 618	6.36338	6.6736	-5.01599	-1.2399	8e-06	0.000375	down	coding	703
209464_at	AURKB	NM_001256834	aurora kinase B	6.37475	5.81369	5.11962	1.47535	8e-06	0.000377	up	coding	704
204890_s_at	LCK	NM_001042771	lymphocyte-specific protein tyrosine kinase	10.2454	10.7303	-4.82464	-1.39949	8e-06	0.000381	down	coding	705
228033_at	E2F7	NM_203394	E2F transcription factor 7	4.31396	3.96718	4.77919	1.27172	8e-06	0.000381	up	coding	706
207433_at	IL10	NM_000572	interleukin 10	4.08844	3.78263	4.76409	1.23611	8e-06	0.000381	up	coding	707
229221_at	CD44	NM_000610	CD44 molecule (Indian blood group)	8.1625	7.40115	5.01057	1.69509	8e-06	0.000385	up	coding	708
220760_x_at	ZNF665	NM_024733	zinc finger protein 665	8.01351	8.41638	-5.30972	-1.32214	8e-06	0.000385	down	coding	709
219208_at	FBXO11	NM_001190274	F-box protein 11	4.85003	4.45207	4.93028	1.31765	8e-06	0.000388	up	coding	710
37145_at	GNLY	NM_006433	granulysin	10.9199	11.6695	-4.74251	-1.68126	8e-06	0.000389	down	coding	711
222446_s_at	BACE2	NM_012105	beta-site APP-cleaving enzyme 2	5.94231	6.38176	-5.22706	-1.35609	8e-06	0.00039	down	coding	712
224482_s_at	RAB11FIP4	NM_032932	RAB11 family interacting protein 4 (class II)	7.11729	7.48582	-4.86538	-1.29104	8e-06	0.00039	down	coding	713
240674_at	JARID2	NM_001267040	jumonji, AT rich interactive domain 2	5.82644	5.45874	5.00464	1.29029	8e-06	0.000391	up	coding	714
212540_at	CDC34	NM_004359	cell division cycle 34	8.6551	8.27594	4.71211	1.30059	9e-06	0.000392	up	coding	715
204121_at	GADD45G	NM_006705	growth arrest and DNA-damage-inducible, gamma	5.84539	5.4646	5.06713	1.30205	9e-06	0.000394	up	coding	716
205205_at	RELB	NM_006509	v-rel reticuloendotheliosis viral oncogene homolog B	7.94077	7.5687	4.78916	1.29421	9e-06	0.000395	up	coding	717
214230_at	CDC42	NM_001039802	cell division cycle 42	7.81452	6.86171	5.07417	1.93565	9e-06	0.000396	up	coding	718
230050_at	NACC2	NM_144653	NACC family member 2, BEN and BTB (POZ) domain containing	7.29978	6.79125	5.05794	1.42259	9e-06	0.000396	up	coding	719
205909_at	POLE2	NM_001197330	polymerase (DNA directed), epsilon 2, accessory subunit	6.78316	6.34934	4.90712	1.35081	9e-06	0.000396	up	coding	720
227945_at	TBC1D1	NM_001253912	TBC1 (tre-2/USP6, BUB2, cdc16) domain family, member 1	7.65528	8.00158	-4.85291	-1.27129	9e-06	0.000396	down	coding	721
221775_x_at	RPL22	NM_000983	ribosomal protein L22	13.0983	13.2925	-4.71181	-1.14409	9e-06	0.000396	down	coding	722
202534_x_at	DHFR	NM_000791	dihydrofolate reductase	8.29173	7.86112	4.97831	1.3478	9e-06	0.000397	up	coding	723
212346_s_at	MIR4800	NM_006454	microRNA 4800	8.12678	8.44495	-4.89588	-1.24675	9e-06	0.000397	down	coding	724
1555728_a_at	MS4A4A	NM_001243266	membrane-spanning 4-domains, subfamily A, member 4A	8.11245	7.11925	4.81331	1.9906	9e-06	0.000402	up	coding	725
1554095_at	RBM33	NM_001008408	RNA binding motif protein 33	6.87222	6.46488	5.1094	1.32624	9e-06	0.000402	up	coding	726
224893_at	ATL3	NM_015459	atlastin GTPase 3	9.22304	9.59951	-4.77049	-1.29817	9e-06	0.000402	down	coding	727
1570354_s_at	ZNF169	NM_194320	zinc finger protein 169	4.83524	4.5203	4.89209	1.24396	9e-06	0.000402	up	coding	728
210982_s_at	HLA-DRA	NM_019111	major histocompatibility complex, class II, DR alpha	12.7242	13.0703	-4.77627	-1.27113	9e-06	0.000403	down	coding	729
202098_s_at	PRMT2	NM_001242864	protein arginine methyltransferase 2	8.95303	9.25958	-4.89184	-1.23675	9e-06	0.000405	down	coding	730
204271_s_at	EDNRB	NM_000115	endothelin receptor type B	4.31729	4.03415	4.99155	1.21684	9e-06	0.000405	up	coding	731
236330_at	---	---	---	5.36524	5.72478	-5.20523	-1.28302	9e-06	0.000418	down	coding	732
220496_at	CLEC1B	NM_001099431	C-type lectin domain family 1, member B	8.41136	7.40002	5.00957	2.01579	9e-06	0.000419	up	coding	733
210338_s_at	HSPA8	NM_006597	heat shock 70kDa protein 8	11.9936	12.4319	-4.76501	-1.35502	9e-06	0.000419	down	coding	734
243507_s_at	C20orf196	NM_152504	chromosome 20 open reading frame 196	6.74895	6.38781	4.8782	1.28444	9e-06	0.000419	up	coding	735
221932_s_at	GLRX5	NM_016417	glutaredoxin 5	10.2703	9.78813	4.68632	1.39682	9e-06	0.000423	up	coding	736
225320_at	MCU	NM_001270679	mitochondrial calcium uniporter	7.45045	7.20278	4.77364	1.18729	1e-05	0.000426	up	coding	737
237252_at	THBD	NM_000361	thrombomodulin	7.03281	5.98115	4.77126	2.07292	1e-05	0.00043	up	coding	738
201489_at	PPIF	NM_005729	peptidylprolyl isomerase F	9.36039	8.63123	4.96751	1.65767	1e-05	0.00043	up	coding	739
222235_s_at	CSGALNACT2	NM_018590	chondroitin sulfate N-acetylgalactosaminyltransferase 2	9.73451	9.2651	4.93102	1.38454	1e-05	0.000431	up	coding	740
227319_at	KLHL36	NM_024731	kelch-like family member 36	9.15141	9.51135	-5.02799	-1.28337	1e-05	0.000432	down	coding	741
202675_at	SDHB	NM_003000	succinate dehydrogenase complex, subunit B, iron sulfur (Ip)	9.37079	9.00223	4.86682	1.29106	1e-05	0.000436	up	coding	742
200622_x_at	CALM1	NM_001166106	calmodulin 1 (phosphorylase kinase, delta)	10.0002	9.57442	5.04369	1.34326	1e-05	0.000439	up	coding	743
207147_at	DLX2	NM_004405	distal-less homeobox 2	4.32647	4.13359	4.97462	1.14305	1e-05	0.00044	up	coding	744
1555613_a_at	ZAP70	NM_001079	zeta-chain (TCR) associated protein kinase 70kDa	9.58534	10.1387	-4.70879	-1.46752	1e-05	0.000441	down	coding	745
201890_at	RRM2	NM_001034	ribonucleotide reductase M2	8.61037	7.39979	5.16752	2.3143	1e-05	0.000442	up	coding	746
200779_at	ATF4	NM_001675	activating transcription factor 4	11.2817	10.8771	5.10234	1.32366	1e-05	0.000442	up	coding	747
213377_x_at	RPS12	NM_001016	ribosomal protein S12	13.9168	14.0513	-4.6902	-1.09772	1e-05	0.000442	down	coding	748
240267_at	---	---	---	4.55441	4.42805	4.68872	1.09153	1e-05	0.000446	up	coding	749
203317_at	PSD4	NM_012455	pleckstrin and Sec7 domain containing 4	8.52627	8.84314	-4.74844	-1.24562	1e-05	0.000449	down	coding	750
235407_at	---	---	---	7.32105	6.68671	5.00105	1.55222	1e-05	0.000453	up	coding	751
217274_x_at	MYL4	NM_001002841	myosin, light chain 4, alkali; atrial, embryonic	6.73295	6.32915	4.7942	1.32299	1e-05	0.000453	up	coding	752
200036_s_at	RPL10A	NM_007104	ribosomal protein L10a	12.9322	13.2156	-4.6779	-1.21709	1e-05	0.000453	down	coding	753
200949_x_at	RPS20	NM_001023	ribosomal protein S20	13.5459	13.6943	-4.69752	-1.10835	1e-05	0.000453	down	coding	754
200983_x_at	CD59	NM_000611	CD59 molecule, complement regulatory protein	8.59561	7.91522	5.05043	1.60257	1e-05	0.000454	up	coding	755
217572_at	---	---	---	7.08542	6.42248	4.66039	1.5833	1e-05	0.000456	up	coding	756
205101_at	CIITA	NM_000246	class II, major histocompatibility complex, transactivator	7.33619	7.83124	-5.0885	-1.40937	1.1e-05	0.000459	down	coding	757
205592_at	SLC4A1	NM_000342	solute carrier family 4, anion exchanger, member 1 (erythrocyte membrane protein band 3, Diego blood group)	8.43589	7.52676	4.6478	1.87791	1.1e-05	0.000463	up	coding	758
204439_at	IFI44L	NM_006820	interferon-induced protein 44-like	10.8528	9.0181	5.13365	3.56691	1.1e-05	0.000464	up	coding	759
210357_s_at	SMOX	NM_001270691	spermine oxidase	8.69811	7.97498	4.84584	1.65076	1.1e-05	0.000464	up	coding	760
242600_at	FRMD3	NM_001244959	FERM domain containing 3	7.00344	6.37941	4.8905	1.54117	1.1e-05	0.000464	up	coding	761
226548_at	SBK1	NM_001024401	SH3-binding domain kinase 1	8.3998	8.85678	-4.98332	-1.37267	1.1e-05	0.000464	down	coding	762
204601_at	N4BP1	NM_153029	NEDD4 binding protein 1	8.07407	7.63215	4.9301	1.35841	1.1e-05	0.000464	up	coding	763
1562853_x_at	---	---	---	5.7841	5.40251	4.88457	1.30278	1.1e-05	0.000464	up	coding	764
233591_at	OTTHUMG00000172895	---	NULL	3.64582	3.43579	4.6652	1.15671	1.1e-05	0.000464	up	coding	765
209127_s_at	SART3	NM_014706	squamous cell carcinoma antigen recognized by T cells 3	7.74437	8.3287	-4.87407	-1.49934	1.1e-05	0.000465	down	coding	766
201178_at	FBXO7	NM_001033024	F-box protein 7	10.5579	10.1065	4.72691	1.36743	1.1e-05	0.000465	up	coding	767
239659_at	---	---	---	6.255	5.99353	4.8211	1.1987	1.1e-05	0.000465	up	coding	768
228315_at	ZMAT3	NM_022470	zinc finger, matrin-type 3	7.83722	8.68169	-5.05524	-1.7956	1.1e-05	0.000468	down	coding	769
224378_x_at	MAP1LC3A	NM_032514	microtubule-associated protein 1 light chain 3 alpha	8.20778	7.91217	4.94952	1.2274	1.1e-05	0.000468	up	coding	770
205822_s_at	HMGCS1	NM_001098272	3-hydroxy-3-methylglutaryl-CoA synthase 1 (soluble)	6.23261	5.88049	4.80689	1.27643	1.1e-05	0.000469	up	coding	771
1554835_a_at	B3GNT5	NM_032047	UDP-GlcNAc:betaGal beta-1,3-N-acetylglucosaminyltransferase 5	6.52411	6.10677	4.6858	1.33547	1.1e-05	0.000473	up	coding	772
1563113_at	UBR4	NM_020765	ubiquitin protein ligase E3 component n-recognin 4	5.05664	4.75901	4.89319	1.22913	1.1e-05	0.000473	up	coding	773
204146_at	RAD51AP1	NM_001130862	RAD51 associated protein 1	6.40173	5.84401	4.9003	1.47193	1.1e-05	0.000474	up	coding	774
200937_s_at	RPL5	NM_000969	ribosomal protein L5	12.6563	12.9008	-4.64493	-1.18462	1.1e-05	0.000474	down	coding	775
233499_at	LRRC7	NM_020794	leucine rich repeat containing 7	3.42884	3.34335	4.71546	1.06105	1.1e-05	0.000474	up	coding	776
204886_at	PLK4	NM_001190799	polo-like kinase 4	3.98144	3.76543	4.86993	1.16152	1.1e-05	0.000476	up	coding	777
224831_at	CPEB4	NM_030627	cytoplasmic polyadenylation element binding protein 4	7.97484	7.34983	5.0231	1.54221	1.1e-05	0.00048	up	coding	778
205554_s_at	DNASE1L3	NM_001256560	deoxyribonuclease I-like 3	5.86878	6.39192	-5.07947	-1.43708	1.1e-05	0.000481	down	coding	779
230314_at	---	---	---	8.27942	7.31556	5.02644	1.95052	1.1e-05	0.000484	up	coding	780
211889_x_at	CEACAM1	NM_001024912	carcinoembryonic antigen-related cell adhesion molecule 1 (biliary glycoprotein)	6.05925	5.63727	4.62682	1.33977	1.2e-05	0.000487	up	coding	781
229497_at	ANKDD1A	NM_182703	ankyrin repeat and death domain containing 1A	6.27785	5.68638	4.84693	1.50679	1.2e-05	0.000493	up	coding	782
214177_s_at	PBXIP1	NM_020524	pre-B-cell leukemia homeobox interacting protein 1	9.80275	10.1641	-5.04603	-1.2846	1.2e-05	0.000503	down	coding	783
218663_at	NCAPG	NM_022346	non-SMC condensin I complex, subunit G	5.02498	4.29852	4.84908	1.65457	1.2e-05	0.000514	up	coding	784
202147_s_at	IFRD1	NM_001007245	interferon-related developmental regulator 1	8.50749	8.00183	4.89285	1.41977	1.2e-05	0.000516	up	coding	785
217371_s_at	IL15	NM_000585	interleukin 15	6.48463	5.99897	4.6962	1.40023	1.2e-05	0.000516	up	coding	786
48808_at	DHFR	NM_000791	dihydrofolate reductase	7.87856	7.54883	4.74688	1.25678	1.2e-05	0.000516	up	coding	787
201778_s_at	EFCAB14	NM_014774	EF-hand calcium binding domain 14	10.0808	10.4456	-4.82238	-1.28772	1.2e-05	0.000518	down	coding	788
210908_s_at	PFDN5	NM_002624	prefoldin subunit 5	12.2046	12.4271	-4.70549	-1.16673	1.2e-05	0.000518	down	coding	789
204531_s_at	BRCA1	NM_007294	breast cancer 1, early onset	6.16657	5.77933	4.70563	1.30789	1.2e-05	0.000519	up	coding	790
218039_at	NUSAP1	NM_001129897	nucleolar and spindle associated protein 1	7.68415	6.82944	5.01384	1.8084	1.2e-05	0.00052	up	coding	791
213119_at	SLC36A1	NM_078483	solute carrier family 36 (proton/amino acid symporter), member 1	7.8303	7.50117	4.76677	1.25625	1.3e-05	0.000523	up	coding	792
221626_at	ZNF506	NM_001099269	zinc finger protein 506	7.27255	7.61566	-4.83386	-1.26849	1.3e-05	0.000524	down	coding	793
200886_s_at	PGAM1	NM_002629	phosphoglycerate mutase 1 (brain)	11.5079	11.2687	4.77509	1.18037	1.3e-05	0.000524	up	coding	794
1554026_a_at	MYO10	NM_012334	myosin X	5.52324	5.03562	4.66374	1.40213	1.3e-05	0.000543	up	coding	795
217977_at	MSRB1	NM_016332	methionine sulfoxide reductase B1	10.0768	9.60796	4.60485	1.38399	1.3e-05	0.000544	up	coding	796
204254_s_at	VDR	NM_000376	vitamin D (1,25- dihydroxyvitamin D3) receptor	8.0595	7.6122	4.7197	1.36349	1.3e-05	0.000544	up	coding	797
223125_s_at	C1orf21	NM_030806	chromosome 1 open reading frame 21	7.17382	7.88743	-4.95039	-1.63991	1.3e-05	0.000545	down	coding	798
212722_s_at	JMJD6	NM_001081461	jumonji domain containing 6	8.20175	7.64373	4.90264	1.47225	1.3e-05	0.000546	up	coding	799
206584_at	LY96	NM_001195797	lymphocyte antigen 96	10.1378	9.50273	4.78987	1.55304	1.3e-05	0.000551	up	coding	800
203959_s_at	ZBTB40	NM_001083621	zinc finger and BTB domain containing 40	8.31004	8.55345	-4.83551	-1.18379	1.3e-05	0.000551	down	coding	801
208904_s_at	RPS28	NM_001031	ribosomal protein S28	13.759	13.8908	-4.70453	-1.09564	1.3e-05	0.000553	down	coding	802
1554291_at	UHRF1BP1L	NM_001006947	UHRF1 binding protein 1-like	5.418	4.9043	4.77481	1.42771	1.4e-05	0.000556	up	coding	803
243221_at	FAM20A	NM_001243746	family with sequence similarity 20, member A	5.47245	4.72602	4.79237	1.67763	1.4e-05	0.000565	up	coding	804
211991_s_at	HLA-DPA1	NM_001242524	major histocompatibility complex, class II, DP alpha 1	11.7516	12.2439	-4.79805	-1.40671	1.4e-05	0.000565	down	coding	805
225507_at	PNISR	NM_015491	PNN-interacting serine/arginine-rich protein	10.1343	10.6202	-4.88388	-1.40051	1.4e-05	0.000565	down	coding	806
207332_s_at	TFRC	NM_001128148	transferrin receptor (p90, CD71)	10.3209	9.85222	4.84653	1.3838	1.4e-05	0.000565	up	coding	807
243222_at	ALPK1	NM_001102406	alpha-kinase 1	6.12425	5.84764	4.79841	1.21135	1.4e-05	0.000565	up	coding	808
209339_at	SIAH2	NM_005067	siah E3 ubiquitin protein ligase 2	9.27187	8.83124	4.65495	1.35719	1.4e-05	0.000566	up	coding	809
227047_x_at	ZBTB4	NM_001128833	zinc finger and BTB domain containing 4	8.08331	8.46321	-5.08018	-1.30125	1.4e-05	0.000572	down	coding	810
202145_at	LY6E	NM_001127213	lymphocyte antigen 6 complex, locus E	10.2348	9.42704	4.89481	1.75047	1.4e-05	0.000582	up	coding	811
229001_at	PPP1R3E	NM_001276318	protein phosphatase 1, regulatory subunit 3E	7.70277	8.24549	-5.18304	-1.45672	1.4e-05	0.000582	down	coding	812
233528_s_at	GATSL3	NM_001037666	GATS protein-like 3	6.84312	7.12569	-4.82966	-1.21636	1.4e-05	0.000585	down	coding	813
205207_at	IL6	NM_000600	interleukin 6 (interferon, beta 2)	6.24585	5.8618	4.69233	1.305	1.4e-05	0.000586	up	coding	814
221771_s_at	MPHOSPH8	NM_017520	M-phase phosphoprotein 8	8.37292	9.03364	-4.81189	-1.58088	1.5e-05	0.000588	down	coding	815
209200_at	MEF2C	NM_001131005	myocyte enhancer factor 2C	8.17132	8.91917	-4.76882	-1.67929	1.5e-05	0.000591	down	coding	816
227193_at	SLC30A4	NM_013309	solute carrier family 30 (zinc transporter), member 4	7.01149	7.47187	-4.86795	-1.37591	1.5e-05	0.000591	down	coding	817
200017_at	RPS27A	NM_001135592	ribosomal protein S27a	13.4414	13.5819	-4.62046	-1.10227	1.5e-05	0.000593	down	coding	818
211005_at	LAT	NM_001014987	linker for activation of T cells	9.65467	10.1323	-4.75693	-1.39245	1.5e-05	0.000594	down	coding	819
1568949_at	PITPNC1	NM_012417	phosphatidylinositol transfer protein, cytoplasmic 1	7.97877	8.33522	-4.78372	-1.28028	1.5e-05	0.000597	down	coding	820
212144_at	SUN2	NM_001199579	Sad1 and UNC84 domain containing 2	10.0688	10.3333	-4.90815	-1.20125	1.5e-05	0.000597	down	coding	821
226295_at	ITFG2	NM_018463	integrin alpha FG-GAP repeat containing 2	8.29107	8.52244	-4.83942	-1.17395	1.5e-05	0.000602	down	coding	822
203261_at	DCTN6	NM_006571	dynactin 6	9.605	9.10628	4.82339	1.41296	1.5e-05	0.000605	up	coding	823
225950_at	SAMD8	NM_001174156	sterile alpha motif domain containing 8	7.9765	7.48089	4.71633	1.40992	1.5e-05	0.000606	up	coding	824
232232_s_at	SLC22A16	NM_033125	solute carrier family 22 (organic cation/carnitine transporter), member 16	6.40397	5.98874	4.71266	1.33352	1.5e-05	0.000606	up	coding	825
205790_at	SKAP1	NM_001075099	src kinase associated phosphoprotein 1	9.10432	9.46555	-4.75873	-1.28452	1.5e-05	0.000607	down	coding	826
219497_s_at	BCL11A	NM_018014	B-cell CLL/lymphoma 11A (zinc finger protein)	8.68123	9.4052	-4.93808	-1.65173	1.5e-05	0.000611	down	coding	827
200735_x_at	NACA	NM_001113201	nascent polypeptide-associated complex alpha subunit	13.286	13.416	-4.55213	-1.09434	1.5e-05	0.000611	down	coding	828
205900_at	KRT1	NM_006121	keratin 1	7.09415	6.26926	4.554	1.7714	1.5e-05	0.000613	up	coding	829
201738_at	EIF1B	NM_005875	eukaryotic translation initiation factor 1B	11.1946	10.8018	4.71357	1.31292	1.5e-05	0.000614	up	coding	830
212496_s_at	KDM4B	NM_015015	lysine (K)-specific demethylase 4B	9.28694	9.60576	-4.6609	-1.24731	1.5e-05	0.000614	down	coding	831
212090_at	GRINA	NM_000837	glutamate receptor, ionotropic, N-methyl D-aspartate-associated protein 1 (glutamate binding)	8.4531	7.99163	4.70319	1.37694	1.6e-05	0.000626	up	coding	832
214032_at	ZAP70	NM_001079	zeta-chain (TCR) associated protein kinase 70kDa	10.1448	10.5076	-4.64443	-1.28593	1.6e-05	0.000636	down	coding	833
205061_s_at	EXOSC9	NM_001034194	exosome component 9	8.74202	8.40779	4.89954	1.2607	1.6e-05	0.000636	up	coding	834
216010_x_at	FUT3	NM_000149	fucosyltransferase 3 (galactoside 3(4)-L-fucosyltransferase, Lewis blood group)	5.31087	5.02354	4.68593	1.22038	1.6e-05	0.000642	up	coding	835
201891_s_at	B2M	NM_004048	beta-2-microglobulin	13.8739	13.7932	4.57365	1.05753	1.6e-05	0.000642	up	coding	836
242819_at	---	---	---	5.27413	6.19256	-5.3651	-1.89005	1.6e-05	0.000643	down	coding	837
1554544_a_at	MBP	NM_001025081	myelin basic protein	9.08315	9.75463	-5.07581	-1.5927	1.6e-05	0.000644	down	coding	838
228726_at	SERPINB1	NM_030666	serpin peptidase inhibitor, clade B (ovalbumin), member 1	9.22962	8.76631	4.66382	1.37871	1.6e-05	0.000644	up	coding	839
225673_at	MYADM	NM_001020818	myeloid-associated differentiation marker	11.5938	11.182	4.81907	1.33039	1.6e-05	0.000644	up	coding	840
239337_at	LOC400768	XR_110483	uncharacterized LOC400768	3.79976	3.64518	4.75668	1.1131	1.6e-05	0.000644	up	coding	841
1552370_at	C4orf33	NM_001099783	chromosome 4 open reading frame 33	7.07684	6.58418	4.69541	1.40704	1.7e-05	0.000651	up	coding	842
233015_at	MBNL1	NM_021038	muscleblind-like splicing regulator 1	5.75528	6.1087	-4.81143	-1.27758	1.7e-05	0.000651	down	coding	843
1555086_at	STAT5B	NM_012448	signal transducer and activator of transcription 5B	8.29247	8.81935	-5.08153	-1.44081	1.7e-05	0.000661	down	coding	844
200959_at	FUS	NM_001010850	fused in sarcoma	10.0103	9.6049	4.9166	1.3245	1.7e-05	0.000661	up	coding	845
204131_s_at	FOXO3	NM_001455	forkhead box O3	9.84393	9.13303	4.84621	1.63683	1.7e-05	0.000664	up	coding	846
202533_s_at	DHFR	NM_000791	dihydrofolate reductase	6.46387	5.94006	4.76415	1.43775	1.7e-05	0.000664	up	coding	847
204947_at	E2F1	NM_005225	E2F transcription factor 1	7.29145	6.86426	5.0655	1.34461	1.7e-05	0.000667	up	coding	848
1554999_at	RASGEF1B	NM_152545	RasGEF domain family, member 1B	6.55422	5.65197	4.82416	1.86898	1.7e-05	0.000669	up	coding	849
228230_at	HELZ2	NM_001037335	helicase with zinc finger 2, transcriptional coactivator	8.27229	7.78003	4.53521	1.40665	1.7e-05	0.000669	up	coding	850
204848_x_at	HBG1	NM_000184	hemoglobin, gamma A	12.6299	10.4146	4.96469	4.64395	1.7e-05	0.000672	up	coding	851
209892_at	FUT4	NM_002033	fucosyltransferase 4 (alpha (1,3) fucosyltransferase, myeloid-specific)	7.60176	7.01334	4.76542	1.50361	1.7e-05	0.000673	up	coding	852
217867_x_at	BACE2	NM_012105	beta-site APP-cleaving enzyme 2	6.25114	6.69288	-5.09127	-1.35824	1.7e-05	0.000673	down	coding	853
228947_x_at	TMEM204	NM_001256541	transmembrane protein 204	7.09028	7.43643	-5.07012	-1.27117	1.7e-05	0.000673	down	coding	854
226936_at	CENPW	NM_001012507	centromere protein W	7.77951	7.13925	4.84209	1.5586	1.7e-05	0.000674	up	coding	855
232530_at	PLD1	NM_001130081	phospholipase D1, phosphatidylcholine-specific	5.12907	4.67552	4.58489	1.3694	1.7e-05	0.000674	up	coding	856
228788_at	YPEL1	NM_013313	yippee-like 1 (Drosophila)	6.77919	7.33228	-4.81692	-1.46723	1.8e-05	0.000678	down	coding	857
226661_at	CDCA2	NM_152562	cell division cycle associated 2	5.96216	5.5275	4.61374	1.35159	1.8e-05	0.000678	up	coding	858
1554719_at	NDUFA10	NM_004544	NADH dehydrogenase (ubiquinone) 1 alpha subcomplex, 10, 42kDa	5.94392	5.62852	4.71823	1.24435	1.8e-05	0.000679	up	coding	859
234973_at	SLC38A5	NM_033518	solute carrier family 38, member 5	7.50021	7.10045	4.77643	1.31929	1.8e-05	0.00068	up	coding	860
243547_at	LINC00921	NM_005741	long intergenic non-protein coding RNA 921	5.48541	5.82683	-5.05652	-1.267	1.8e-05	0.00068	down	coding	861
1555503_a_at	TMCC2	NM_001242925	transmembrane and coiled-coil domain family 2	6.96191	6.63483	4.54101	1.25447	1.8e-05	0.00068	up	coding	862
204153_s_at	MFNG	NM_001166343	MFNG O-fucosylpeptide 3-beta-N-acetylglucosaminyltransferase	9.97288	10.2521	-4.56002	-1.2135	1.8e-05	0.00068	down	coding	863
237515_at	TMEM56	NM_001199679	transmembrane protein 56	3.50499	3.37289	4.51056	1.09589	1.8e-05	0.00068	up	coding	864
218253_s_at	EIF2D	NM_001201478	eukaryotic translation initiation factor 2D	9.32128	9.65863	-4.68604	-1.26343	1.8e-05	0.000681	down	coding	865
243605_at	---	---	---	4.12241	3.83113	4.70249	1.22373	1.8e-05	0.000683	up	coding	866
1552773_at	CLEC4D	NM_080387	C-type lectin domain family 4, member D	7.8094	6.88709	4.77637	1.89515	1.8e-05	0.000687	up	coding	867
205085_at	ORC1	NM_001190818	origin recognition complex, subunit 1	5.3801	5.09195	4.67102	1.22107	1.8e-05	0.000699	up	coding	868
202333_s_at	UBE2B	NM_003337	ubiquitin-conjugating enzyme E2B	10.2596	9.93157	4.78055	1.25528	1.8e-05	0.000701	up	coding	869
208536_s_at	BCL2L11	NM_001204106	BCL2-like 11 (apoptosis facilitator)	5.07323	4.6424	4.60221	1.34801	1.9e-05	0.000703	up	coding	870
225875_s_at	NIPAL3	NM_020448	NIPA-like domain containing 3	7.30996	7.73317	-4.85023	-1.34091	1.9e-05	0.000703	down	coding	871
208808_s_at	HMGB2	NM_001130688	high mobility group box 2	11.9886	11.667	4.7467	1.24969	1.9e-05	0.000703	up	coding	872
207266_x_at	RBMS1	NM_002897	RNA binding motif, single stranded interacting protein 1	10.6484	10.309	4.86104	1.26522	1.9e-05	0.000714	up	coding	873
1553769_at	SLAMF9	NM_001146172	SLAM family member 9	5.83674	5.65135	4.69386	1.13713	1.9e-05	0.000714	up	coding	874
219990_at	E2F8	NM_001256371	E2F transcription factor 8	4.86483	4.3911	4.74391	1.38869	1.9e-05	0.000722	up	coding	875
222855_s_at	TRPV2	NM_016113	transient receptor potential cation channel, subfamily V, member 2	6.88671	7.2969	-4.74741	-1.32886	1.9e-05	0.000724	down	coding	876
220315_at	PARP11	NM_020367	poly (ADP-ribose) polymerase family, member 11	6.11436	5.79755	4.57144	1.24557	1.9e-05	0.000724	up	coding	877
221490_at	UBAP1	NM_001171201	ubiquitin associated protein 1	8.52678	8.27831	4.66243	1.18795	1.9e-05	0.000724	up	coding	878
202620_s_at	PLOD2	NM_000935	procollagen-lysine, 2-oxoglutarate 5-dioxygenase 2	4.05247	3.78177	4.4894	1.20639	1.9e-05	0.000729	up	coding	879
211851_x_at	BRCA1	NM_007294	breast cancer 1, early onset	6.75616	6.52167	4.76501	1.1765	1.9e-05	0.00073	up	coding	880
204751_x_at	DSC2	NM_004949	desmocollin 2	5.22448	4.6673	4.5896	1.47139	2e-05	0.000732	up	coding	881
211685_s_at	NCALD	NM_001040624	neurocalcin delta	7.25656	7.76621	-4.93131	-1.4237	2e-05	0.000739	down	coding	882
225206_s_at	MTRF1L	NM_001114184	mitochondrial translational release factor 1-like	7.54766	7.23606	4.66447	1.24109	2e-05	0.000739	up	coding	883
232596_at	DIAPH3	NM_001042517	diaphanous homolog 3 (Drosophila)	4.00694	3.85889	4.54607	1.10807	2e-05	0.000741	up	coding	884
201921_at	GNG10	NM_001017998	guanine nucleotide binding protein (G protein), gamma 10	10.7178	10.2963	4.62676	1.33927	2e-05	0.000747	up	coding	885
200797_s_at	MCL1	NM_001197320	myeloid cell leukemia sequence 1 (BCL2-related)	12.9679	12.7648	4.77897	1.15116	2e-05	0.000747	up	coding	886
226279_at	PRSS23	NM_007173	protease, serine, 23	5.68872	6.54385	-5.00301	-1.80892	2e-05	0.000748	down	coding	887
230942_at	CMTM5	NM_001037288	CKLF-like MARVEL transmembrane domain containing 5	8.12048	7.3655	4.84909	1.68761	2e-05	0.000748	up	coding	888
206254_at	EGF	NM_001178130	epidermal growth factor	5.95505	5.32886	4.6863	1.54348	2e-05	0.000748	up	coding	889
203764_at	DLGAP5	NM_001146015	discs, large (Drosophila) homolog-associated protein 5	6.41687	5.53031	4.67813	1.84877	2e-05	0.00075	up	coding	890
206364_at	KIF14	NM_014875	kinesin family member 14	5.42241	4.73411	4.81809	1.61139	2e-05	0.000752	up	coding	891
244321_at	PGAP1	NM_024989	post-GPI attachment to proteins 1	4.88843	4.56318	4.56617	1.25288	2e-05	0.000752	up	coding	892
225052_at	TMEM203	NM_053045	transmembrane protein 203	8.80578	9.06282	-4.54364	-1.19502	2e-05	0.000753	down	coding	893
235976_at	SLITRK6	NM_032229	SLIT and NTRK-like family, member 6	3.2738	3.18908	4.52134	1.06048	2e-05	0.000753	up	coding	894
203157_s_at	GLS	NM_001256310	glutaminase	6.45535	6.98054	-4.95882	-1.43913	2e-05	0.000755	down	coding	895
202107_s_at	MCM2	NM_004526	minichromosome maintenance complex component 2	8.64479	8.23439	4.64033	1.32905	2.1e-05	0.000758	up	coding	896
200862_at	DHCR24	NM_014762	24-dehydrocholesterol reductase	6.6499	6.33626	4.51286	1.24284	2.1e-05	0.000772	up	coding	897
229770_at	GLT1D1	NM_144669	glycosyltransferase 1 domain containing 1	8.90051	8.36828	4.63579	1.44616	2.1e-05	0.000773	up	coding	898
233479_at	---	---	---	6.23935	5.82555	4.48954	1.33218	2.1e-05	0.000774	up	coding	899
1555826_at	BIRC5	NM_001012270	baculoviral IAP repeat containing 5	6.57966	6.22	4.71755	1.28313	2.1e-05	0.000775	up	coding	900
226718_at	AMIGO1	NM_020703	adhesion molecule with Ig-like domain 1	7.00798	7.37075	-4.80806	-1.28589	2.1e-05	0.000778	down	coding	901
208879_x_at	PRPF6	NM_012469	pre-mRNA processing factor 6	7.7474	8.15269	-4.68198	-1.32436	2.1e-05	0.000781	down	coding	902
213599_at	OIP5	NM_007280	Opa interacting protein 5	5.87386	5.48497	4.50838	1.30939	2.1e-05	0.000781	up	coding	903
229058_at	ANKRD16	NM_001009941	ankyrin repeat domain 16	6.52252	6.84466	-4.58827	-1.25018	2.1e-05	0.000781	down	coding	904
1560354_at	CTD-2083E4.4	---	NULL	5.03722	4.7834	4.6498	1.19236	2.1e-05	0.000781	up	coding	905
202095_s_at	BIRC5	NM_001012270	baculoviral IAP repeat containing 5	6.63585	5.92486	4.82857	1.63693	2.2e-05	0.000783	up	coding	906
227680_at	ZNF326	NM_181781	zinc finger protein 326	7.97748	7.42918	4.8137	1.46236	2.2e-05	0.000783	up	coding	907
209868_s_at	RBMS1	NM_002897	RNA binding motif, single stranded interacting protein 1	10.5281	10.1932	4.73652	1.26128	2.2e-05	0.000783	up	coding	908
202645_s_at	MEN1	NM_000244	multiple endocrine neoplasia I	8.64348	8.91015	-4.50458	-1.20303	2.2e-05	0.000783	down	coding	909
227920_at	BEND3	NM_001080450	BEN domain containing 3	6.98545	6.7272	4.67044	1.19602	2.2e-05	0.000783	up	coding	910
221417_x_at	S1PR5	NM_001166215	sphingosine-1-phosphate receptor 5	5.7334	6.34455	-4.91144	-1.52748	2.2e-05	0.000785	down	coding	911
213198_at	ACVR1B	NM_004302	activin A receptor, type IB	8.25766	7.87868	4.66455	1.30043	2.2e-05	0.000798	up	coding	912
207840_at	CD160	NM_007053	CD160 molecule	7.99741	8.75635	-4.49813	-1.69224	2.2e-05	0.000799	down	coding	913
216231_s_at	B2M	NM_004048	beta-2-microglobulin	14.0303	13.9262	4.77013	1.07483	2.2e-05	0.000799	up	coding	914
204083_s_at	TPM2	NM_001145822	tropomyosin 2 (beta)	7.01532	7.57009	-4.70691	-1.46893	2.2e-05	0.0008	down	coding	915
204907_s_at	BCL3	NM_005178	B-cell CLL/lymphoma 3	6.84433	6.40406	4.63849	1.35685	2.2e-05	0.0008	up	coding	916
219556_at	C16orf59	NM_025108	chromosome 16 open reading frame 59	6.93382	6.63103	4.871	1.23353	2.2e-05	0.0008	up	coding	917
218782_s_at	ATAD2	NM_014109	ATPase family, AAA domain containing 2	6.76732	6.23336	4.79881	1.44791	2.3e-05	0.000811	up	coding	918
37117_at	ARHGAP8	NM_001017526	Rho GTPase activating protein 8	4.99231	4.76369	4.59958	1.17172	2.3e-05	0.000811	up	coding	919
214617_at	PRF1	NM_001083116	perforin 1 (pore forming protein)	11.5172	12.2056	-4.54908	-1.61154	2.3e-05	0.000812	down	coding	920
1560316_s_at	GLCCI1	NM_138426	glucocorticoid induced transcript 1	7.07825	7.41771	-4.57643	-1.26528	2.3e-05	0.000812	down	coding	921
206207_at	CLC	NM_001828	Charcot-Leyden crystal galectin	8.71639	9.61707	-4.7221	-1.86696	2.3e-05	0.000813	down	coding	922
202551_s_at	CRIM1	NM_016441	cysteine rich transmembrane BMP regulator 1 (chordin-like)	6.3586	7.05029	-5.00119	-1.61518	2.3e-05	0.000815	down	coding	923
210240_s_at	CDKN2D	NM_001800	cyclin-dependent kinase inhibitor 2D (p19, inhibits CDK4)	9.452	9.03054	4.7219	1.33929	2.3e-05	0.000815	up	coding	924
230425_at	EPHB1	NM_004441	EPH receptor B1	3.93587	4.2773	-4.90609	-1.26701	2.3e-05	0.000816	down	coding	925
203332_s_at	INPP5D	NM_001017915	inositol polyphosphate-5-phosphatase, 145kDa	9.8318	10.134	-4.5054	-1.23298	2.3e-05	0.000816	down	coding	926
222880_at	AKT3	NM_001206729	v-akt murine thymoma viral oncogene homolog 3 (protein kinase B, gamma)	4.57327	5.00652	-4.90066	-1.35028	2.3e-05	0.000817	down	coding	927
200673_at	LAPTM4A	NM_014713	lysosomal protein transmembrane 4 alpha	11.0785	10.801	4.52038	1.21212	2.3e-05	0.000817	up	coding	928
202590_s_at	PDK2	NM_001199898	pyruvate dehydrogenase kinase, isozyme 2	7.22811	7.42957	-4.52266	-1.14986	2.3e-05	0.000818	down	coding	929
224918_x_at	MGST1	NM_001260511	microsomal glutathione S-transferase 1	9.56312	8.78871	4.73634	1.7105	2.3e-05	0.000819	up	coding	930
219364_at	DHX58	NM_024119	DEXH (Asp-Glu-X-His) box polypeptide 58	7.66777	7.13947	4.71193	1.44222	2.3e-05	0.000819	up	coding	931
213726_x_at	TUBB4B	NM_006088	tubulin, beta 4B class IVb	9.75672	9.30562	4.94992	1.36708	2.3e-05	0.000819	up	coding	932
212285_s_at	AGRN	NM_198576	agrin	7.41881	7.07348	4.57179	1.27045	2.3e-05	0.000819	up	coding	933
204434_at	SPATA2	NM_001135773	spermatogenesis associated 2	6.81221	6.50522	4.79192	1.23712	2.3e-05	0.000819	up	coding	934
225746_at	RAB11FIP4	NM_032932	RAB11 family interacting protein 4 (class II)	6.84855	7.32498	-4.88369	-1.3913	2.3e-05	0.00082	down	coding	935
243638_at	---	---	---	6.00976	5.8221	4.58849	1.13891	2.3e-05	0.00082	up	coding	936
243579_at	MSI2	NM_138962	musashi RNA-binding protein 2	7.73061	7.52281	4.58893	1.15493	2.3e-05	0.000821	up	coding	937
225520_at	LOC100996643	NM_001242767	monofunctional C1-tetrahydrofolate synthase, mitochondrial-like	7.34502	6.7675	4.72448	1.49228	2.3e-05	0.000824	up	coding	938
221677_s_at	DONSON	NM_017613	downstream neighbor of SON	7.06986	6.63476	4.67779	1.35201	2.3e-05	0.000824	up	coding	939
208871_at	ATN1	NM_001007026	atrophin 1	6.67677	6.37738	4.84078	1.23063	2.4e-05	0.000824	up	coding	940
200717_x_at	RPL7	NM_000971	ribosomal protein L7	13.8119	13.915	-4.44755	-1.07408	2.3e-05	0.000824	down	coding	941
1569401_at	CLEC12A	NM_001207010	C-type lectin domain family 12, member A	6.92657	6.26693	4.60647	1.57968	2.4e-05	0.000829	up	coding	942
220651_s_at	MCM10	NM_018518	minichromosome maintenance complex component 10	5.78231	5.1991	4.69198	1.49818	2.4e-05	0.000829	up	coding	943
204423_at	MKLN1	NM_001145354	muskelin 1, intracellular mediator containing kelch motifs	6.86908	6.5215	4.63673	1.27242	2.4e-05	0.000832	up	coding	944
209383_at	DDIT3	NM_001195053	DNA-damage-inducible transcript 3	9.34215	8.81243	4.65582	1.44364	2.4e-05	0.000837	up	coding	945
227819_at	LGR6	NM_001017403	leucine-rich repeat containing G protein-coupled receptor 6	6.40896	6.88843	-4.9517	-1.39423	2.4e-05	0.000837	down	coding	946
1555827_at	CCNL1	NM_020307	cyclin L1	7.51668	6.81327	4.70253	1.62835	2.4e-05	0.000847	up	coding	947
244049_at	---	---	---	4.59073	4.81488	-4.72136	-1.16809	2.4e-05	0.000847	down	coding	948
219356_s_at	CHMP5	NM_001195536	charged multivesicular body protein 5	10.1734	9.59665	4.68775	1.49144	2.4e-05	0.000849	up	coding	949
242356_at	VTI1A	NM_145206	vesicle transport through interaction with t-SNAREs 1A	6.63895	6.25977	4.62789	1.3006	2.4e-05	0.000849	up	coding	950
204419_x_at	HBG1	NM_000184	hemoglobin, gamma A	12.591	10.3384	4.86892	4.76553	2.5e-05	0.000851	up	coding	951
225207_at	PDK4	NM_002612	pyruvate dehydrogenase kinase, isozyme 4	6.85628	8.25105	-4.83763	-2.62947	2.5e-05	0.000851	down	coding	952
211267_at	HESX1	NM_003865	HESX homeobox 1	6.35357	5.85645	4.50671	1.41139	2.5e-05	0.000851	up	coding	953
208304_at	CCR3	NM_001164680	chemokine (C-C motif) receptor 3	5.64607	6.12511	-4.80326	-1.39382	2.5e-05	0.000855	down	coding	954
218850_s_at	LIMD1	NM_014240	LIM domains containing 1	6.88648	7.44157	-4.66794	-1.46926	2.5e-05	0.000856	down	coding	955
234944_s_at	MTFR2	NM_001099286	mitochondrial fission regulator 2	5.95947	5.73974	4.73254	1.16451	2.5e-05	0.00086	up	coding	956
208960_s_at	KLF6	NM_001008490	Kruppel-like factor 6	10.8702	10.2692	4.66108	1.5168	2.5e-05	0.000861	up	coding	957
200024_at	RPS5	NM_001009	ribosomal protein S5	13.3829	13.5827	-4.44234	-1.14849	2.5e-05	0.000861	down	coding	958
224690_at	FAM210B	NM_080821	family with sequence similarity 210, member B	9.30915	8.69247	4.43839	1.53334	2.5e-05	0.000862	up	coding	959
224570_s_at	IRF2BP2	NM_001077397	interferon regulatory factor 2 binding protein 2	9.54051	9.1767	4.54163	1.28682	2.5e-05	0.000873	up	coding	960
224826_at	GPCPD1	NM_019593	glycerophosphocholine phosphodiesterase GDE1 homolog (S. cerevisiae)	10.4792	10.0046	4.73912	1.38956	2.6e-05	0.000876	up	coding	961
204102_s_at	EEF2	NM_001961	eukaryotic translation elongation factor 2	12.7669	13.0353	-4.44616	-1.20444	2.6e-05	0.000876	down	coding	962
234512_x_at	OTTHUMG00000014227	---	NULL	11.8717	12.1399	-4.64097	-1.20428	2.6e-05	0.000877	down	coding	963
225557_at	CSRNP1	NM_033027	cysteine-serine-rich nuclear protein 1	8.93403	8.15707	4.81779	1.71351	2.6e-05	0.000881	up	coding	964
218350_s_at	GMNN	NM_001251989	geminin, DNA replication inhibitor	7.912	7.10189	4.79817	1.75335	2.6e-05	0.000885	up	coding	965
218559_s_at	MAFB	NM_005461	v-maf musculoaponeurotic fibrosarcoma oncogene homolog B (avian)	11.3371	10.3009	4.75322	2.05085	2.6e-05	0.000887	up	coding	966
238026_at	RPL35A	NM_000996	ribosomal protein L35a	7.50075	7.8965	-4.64856	-1.31563	2.6e-05	0.000887	down	coding	967
228372_at	C10orf128	NM_001010863	chromosome 10 open reading frame 128	6.35089	6.91264	-4.90599	-1.47606	2.6e-05	0.000891	down	coding	968
211656_x_at	HLA-DQB1	NM_001243961	major histocompatibility complex, class II, DQ beta 1	10.359	10.8428	-4.63092	-1.39847	2.6e-05	0.000891	down	coding	969
201858_s_at	SRGN	NM_002727	serglycin	13.2384	12.8	4.70036	1.35516	2.6e-05	0.000892	up	coding	970
226183_at	GSK3B	NM_001146156	glycogen synthase kinase 3 beta	7.00024	7.42491	-4.65646	-1.34227	2.6e-05	0.000892	down	coding	971
203358_s_at	EZH2	NM_001203247	enhancer of zeste homolog 2 (Drosophila)	7.57108	6.93616	4.74373	1.55285	2.6e-05	0.000894	up	coding	972
212660_at	PHF15	NM_015288	PHD finger protein 15	9.51853	9.99243	-4.59531	-1.38886	2.7e-05	0.000898	down	coding	973
201666_at	TIMP1	NM_003254	TIMP metallopeptidase inhibitor 1	11.1106	10.4821	4.70741	1.54601	2.7e-05	0.000899	up	coding	974
226336_at	LOC101060363	NM_021130	peptidyl-prolyl cis-trans isomerase A-like	9.15695	9.47684	-4.50722	-1.24824	2.7e-05	0.000903	down	coding	975
222025_s_at	OPLAH	NM_017570	5-oxoprolinase (ATP-hydrolysing)	5.55438	5.21058	4.66634	1.26909	2.7e-05	0.000905	up	coding	976
203748_x_at	RBMS1	NM_002897	RNA binding motif, single stranded interacting protein 1	10.6943	10.3673	4.73873	1.25446	2.7e-05	0.000906	up	coding	977
215783_s_at	ALPL	NM_000478	alkaline phosphatase, liver/bone/kidney	5.84769	5.32441	4.40425	1.43722	2.7e-05	0.000907	up	coding	978
209930_s_at	NFE2	NM_001136023	nuclear factor (erythroid-derived 2), 45kDa	8.37146	7.52801	4.56623	1.79433	2.7e-05	0.000911	up	coding	979
241854_at	DNASE1	NM_005223	deoxyribonuclease I	5.71388	6.14361	-4.95754	-1.34698	2.7e-05	0.000915	down	coding	980
209034_at	PNRC1	NM_006813	proline-rich nuclear receptor coactivator 1	11.2763	11.523	-4.5954	-1.1865	2.7e-05	0.000916	down	coding	981
229126_at	TMEM19	NM_018279	transmembrane protein 19	7.30228	7.89966	-4.57104	-1.51297	2.7e-05	0.000917	down	coding	982
34206_at	ARAP1	NM_001040118	ArfGAP with RhoGAP domain, ankyrin repeat and PH domain 1	9.18863	9.49879	-4.46614	-1.23984	2.7e-05	0.000919	down	coding	983
201600_at	PHB2	NM_001144831	prohibitin 2	11.4906	11.7165	-4.39862	-1.16953	2.8e-05	0.000922	down	coding	984
35265_at	FXR2	NM_004860	fragile X mental retardation, autosomal homolog 2	8.04861	8.26392	-4.59528	-1.16096	2.8e-05	0.000926	down	coding	985
206488_s_at	CD36	NM_000072	CD36 molecule (thrombospondin receptor)	9.97322	9.23687	4.6313	1.66595	2.8e-05	0.000938	up	coding	986
221475_s_at	RPL15	NM_001253379	ribosomal protein L15	13.0518	13.2687	-4.39797	-1.16222	2.8e-05	0.000938	down	coding	987
206522_at	MGAM	NM_004668	maltase-glucoamylase (alpha-glucosidase)	6.74488	5.81736	4.46847	1.90201	2.8e-05	0.00094	up	coding	988
217143_s_at	TRDC	---	T cell receptor delta constant	9.4791	10.2464	-4.61437	-1.70205	2.8e-05	0.000941	down	coding	989
207165_at	HMMR	NM_001142556	hyaluronan-mediated motility receptor (RHAMM)	5.80454	5.13626	4.53829	1.58918	2.8e-05	0.000943	up	coding	990
1555858_at	SETD5-AS1	NM_001013713	SETD5 antisense RNA 1	6.79344	7.33498	-4.7024	-1.45552	2.8e-05	0.000945	down	coding	991
221521_s_at	GINS2	NM_016095	GINS complex subunit 2 (Psf2 homolog)	7.49017	6.85067	4.78133	1.5578	2.9e-05	0.000946	up	coding	992
239147_at	ARSK	NM_198150	arylsulfatase family, member K	5.85617	6.44358	-4.85793	-1.50255	2.9e-05	0.000946	down	coding	993
201945_at	FURIN	NM_002569	furin (paired basic amino acid cleaving enzyme)	8.68867	8.27305	4.76283	1.33387	2.8e-05	0.000946	up	coding	994
209183_s_at	C10orf10	NM_007021	chromosome 10 open reading frame 10	5.43633	5.08085	4.76592	1.27941	2.8e-05	0.000946	up	coding	995
209160_at	AKR1C3	NM_001253908	aldo-keto reductase family 1, member C3	6.12206	7.07375	-4.71219	-1.93415	2.9e-05	0.000951	down	coding	996
217460_at	TNP2	NM_005425	transition protein 2 (during histone to protamine replacement)	3.80255	3.66797	4.60774	1.09778	2.9e-05	0.000951	up	coding	997
203432_at	TMPO	NM_001032283	thymopoietin	8.43247	7.908	4.68898	1.4384	2.9e-05	0.000954	up	coding	998
232405_at	---	---	---	5.64304	6.04224	-4.60597	-1.31878	2.9e-05	0.000954	down	coding	999
212429_s_at	GTF3C2	NM_001035521	general transcription factor IIIC, polypeptide 2, beta 110kDa	8.73396	8.99986	-4.53593	-1.20239	2.9e-05	0.000954	down	coding	1000
207144_s_at	CITED1	NM_001144885	Cbp/p300-interacting transactivator, with Glu/Asp-rich carboxy-terminal domain, 1	6.68942	6.45297	4.73549	1.17809	2.9e-05	0.000954	up	coding	1001
211883_x_at	CEACAM1	NM_001024912	carcinoembryonic antigen-related cell adhesion molecule 1 (biliary glycoprotein)	7.06097	6.54598	4.4407	1.42898	2.9e-05	0.000957	up	coding	1002
223298_s_at	NT5C3A	NM_001002009	5'-nucleotidase, cytosolic IIIA	10.6399	10.1766	4.49961	1.37872	2.9e-05	0.000957	up	coding	1003
208179_x_at	KIR2DL3	NM_014511	killer cell immunoglobulin-like receptor, two domains, long cytoplasmic tail, 3	6.86542	7.38512	-4.70117	-1.43366	2.9e-05	0.000964	down	coding	1004
1554322_a_at	HDAC4	NM_006037	histone deacetylase 4	6.81656	6.51682	4.68598	1.23093	2.9e-05	0.000965	up	coding	1005
239066_at	---	---	---	4.47037	4.71268	-4.73935	-1.18288	2.9e-05	0.000965	down	coding	1006
216559_x_at	HNRNPA1P3	---	heterogeneous nuclear ribonucleoprotein A1 pseudogene 3	9.79138	10.0119	-4.44198	-1.16515	2.9e-05	0.000965	down	coding	1007
201554_x_at	GYG1	NM_001184720	glycogenin 1	9.80861	9.37591	4.46328	1.34976	3e-05	0.000976	up	coding	1008
219607_s_at	MS4A4A	NM_001243266	membrane-spanning 4-domains, subfamily A, member 4A	8.08332	6.73396	4.57824	2.54799	3e-05	0.000977	up	coding	1009
230224_at	ZCCHC18	NM_001143978	zinc finger, CCHC domain containing 18	7.13499	7.60899	-4.80446	-1.38895	3e-05	0.000978	down	coding	1010
219245_s_at	OGFOD2	NM_024623	2-oxoglutarate and iron-dependent oxygenase domain containing 2	7.46922	7.67512	-4.52782	-1.15341	3e-05	0.000985	down	coding	1011
215438_x_at	GSPT1	NM_001130006	G1 to S phase transition 1	10.0145	9.49959	4.48211	1.42894	3e-05	0.000989	up	coding	1012
218009_s_at	PRC1	NM_001267580	protein regulator of cytokinesis 1	6.62149	5.90572	4.85935	1.64237	3.1e-05	0.000997	up	coding	1013
203661_s_at	TMOD1	NM_001166116	tropomodulin 1	7.03136	6.53453	4.37033	1.4111	3.1e-05	0.000997	up	coding	1014
213523_at	CCNE1	NM_001238	cyclin E1	7.51718	7.13018	4.90144	1.30767	3.1e-05	0.000999	up	coding	1015
1560781_at	DNHD1	NM_144666	dynein heavy chain domain 1	3.54808	3.43974	4.59813	1.07798	3.1e-05	0.000999	up	coding	1016
210136_at	MBP	NM_001025081	myelin basic protein	9.83823	10.5985	-4.845	-1.69378	3.1e-05	0.001	down	coding	1017
214729_at	TWISTNB	NM_001002926	TWIST neighbor	4.31569	4.07952	4.45605	1.17786	3.1e-05	0.001	up	coding	1018
206951_at	HIST1H4A	NM_001034077	histone cluster 1, H4a	6.88406	6.59945	4.61314	1.21808	3.1e-05	0.001004	up	coding	1019
209375_at	XPC	NM_001145769	xeroderma pigmentosum, complementation group C	9.12344	9.3892	-4.57769	-1.20227	3.1e-05	0.001007	down	coding	1020
205039_s_at	IKZF1	NM_001220765	IKAROS family zinc finger 1 (Ikaros)	9.54899	10.0062	-4.61831	-1.37287	3.1e-05	0.001012	down	coding	1021
222508_s_at	ARGLU1	NM_018011	arginine and glutamate rich 1	7.05239	7.35189	-4.39401	-1.23072	3.1e-05	0.001012	down	coding	1022
212063_at	CD44	NM_000610	CD44 molecule (Indian blood group)	12.0424	12.2105	-4.41468	-1.12355	3.1e-05	0.001012	down	coding	1023
1561923_a_at	SF3B14	NM_016047	splicing factor 3B, 14 kDa subunit	5.81502	6.24661	-4.70362	-1.34872	3.2e-05	0.001015	down	coding	1024
210999_s_at	GRB10	NM_001001549	growth factor receptor-bound protein 10	6.60048	6.24254	4.57251	1.2816	3.2e-05	0.001015	up	coding	1025
230166_at	KIAA1958	NM_133465	KIAA1958	6.48427	6.16034	4.50303	1.25174	3.2e-05	0.001015	up	coding	1026
1559265_at	SKIDA1	NM_207371	SKI/DACH domain containing 1	3.75057	3.55791	4.58892	1.14287	3.2e-05	0.001017	up	coding	1027
227499_at	FZD3	NM_017412	frizzled family receptor 3	3.7029	3.88792	-4.83609	-1.13683	3.2e-05	0.001032	down	coding	1028
205400_at	WAS	NM_000377	Wiskott-Aldrich syndrome	7.35248	6.91908	4.46639	1.35041	3.2e-05	0.001035	up	coding	1029
223164_at	CCM2	NM_001029835	cerebral cavernous malformation 2	9.20403	9.43508	-4.5169	-1.17369	3.2e-05	0.001036	down	coding	1030
219734_at	SIDT1	NM_017699	SID1 transmembrane family, member 1	8.91949	9.4741	-4.63572	-1.46877	3.3e-05	0.00104	down	coding	1031
204805_s_at	H1FX	NM_006026	H1 histone family, member X	11.3716	10.8254	4.48697	1.46025	3.3e-05	0.00104	up	coding	1032
1553605_a_at	ABCA13	NM_152701	ATP-binding cassette, sub-family A (ABC1), member 13	3.89635	3.35531	4.36976	1.45502	3.3e-05	0.00104	up	coding	1033
221687_s_at	MVB12B	NM_001011703	multivesicular body subunit 12B	7.20233	6.99342	4.4266	1.15581	3.3e-05	0.00104	up	coding	1034
224130_s_at	SRA1	NM_001035235	steroid receptor RNA activator 1	8.98976	8.55607	4.69015	1.35068	3.3e-05	0.001041	up	coding	1035
226914_at	ARPC5L	NM_030978	actin related protein 2/3 complex, subunit 5-like	8.61687	8.12779	4.57854	1.40355	3.3e-05	0.001043	up	coding	1036
223024_at	AP1M1	NM_001130524	adaptor-related protein complex 1, mu 1 subunit	9.50551	9.81021	-4.40658	-1.23516	3.3e-05	0.001043	down	coding	1037
209099_x_at	JAG1	NM_000214	jagged 1	5.88504	5.43729	4.38409	1.36391	3.3e-05	0.001045	up	coding	1038
220588_at	BCAS4	NM_001010974	breast carcinoma amplified sequence 4	6.9601	7.21286	-4.39068	-1.19149	3.3e-05	0.001045	down	coding	1039
1565162_s_at	MGST1	NM_001260511	microsomal glutathione S-transferase 1	7.49545	6.53669	4.55478	1.94365	3.4e-05	0.001056	up	coding	1040
221602_s_at	FAIM3	NM_001142472	Fas apoptotic inhibitory molecule 3	10.3645	10.9423	-4.55105	-1.49254	3.3e-05	0.001056	down	coding	1041
201042_at	TGM2	NM_004613	transglutaminase 2 (C polypeptide, protein-glutamine-gamma-glutamyltransferase)	5.92188	5.42796	4.49779	1.40827	3.3e-05	0.001056	up	coding	1042
203911_at	RAP1GAP	NM_001145657	RAP1 GTPase activating protein	8.36867	7.93684	4.35086	1.34895	3.3e-05	0.001056	up	coding	1043
204074_s_at	CEP104	NM_014704	centrosomal protein 104kDa	7.69848	8.06824	-4.72293	-1.29214	3.3e-05	0.001056	down	coding	1044
208575_at	HIST1H3A	NM_003529	histone cluster 1, H3a	5.05739	4.77813	4.59797	1.21357	3.3e-05	0.001056	up	coding	1045
227638_at	EPG5	NM_020964	ectopic P-granules autophagy protein 5 homolog (C. elegans)	8.12352	7.89865	4.47082	1.16867	3.3e-05	0.001056	up	coding	1046
207339_s_at	LTB	NM_002341	lymphotoxin beta (TNF superfamily, member 3)	11.56	11.8225	-4.37522	-1.19952	3.4e-05	0.001058	down	coding	1047
203575_at	CSNK2A2	NM_001896	casein kinase 2, alpha prime polypeptide	7.61782	7.92092	-4.53796	-1.23379	3.4e-05	0.001063	down	coding	1048
201429_s_at	RPL37A	NM_000998	ribosomal protein L37a	14.2178	14.2964	-4.56902	-1.056	3.4e-05	0.001068	down	coding	1049
1555938_x_at	VIM	NM_003380	vimentin	6.31352	5.56778	4.62216	1.67684	3.4e-05	0.001072	up	coding	1050
1558299_at	---	---	---	8.30262	7.65305	4.60747	1.56869	3.4e-05	0.001072	up	coding	1051
209396_s_at	CHI3L1	NM_001276	chitinase 3-like 1 (cartilage glycoprotein-39)	6.89584	5.98299	4.35868	1.88277	3.4e-05	0.001081	up	coding	1052
209110_s_at	RGL2	NM_001243738	ral guanine nucleotide dissociation stimulator-like 2	8.46311	8.66495	-4.47284	-1.15016	3.5e-05	0.001083	down	coding	1053
211080_s_at	NEK2	NM_001204182	NIMA-related kinase 2	4.7637	4.55044	4.50113	1.15931	3.5e-05	0.001084	up	coding	1054
209514_s_at	RAB27A	NM_004580	RAB27A, member RAS oncogene family	9.73866	9.28036	4.51299	1.37393	3.5e-05	0.001087	up	coding	1055
240369_at	TTC7A	NM_020458	tetratricopeptide repeat domain 7A	5.67521	5.25884	4.58144	1.33456	3.5e-05	0.001087	up	coding	1056
230722_at	BNC2	NM_017637	basonuclin 2	5.85792	6.26552	-4.8123	-1.32648	3.5e-05	0.001087	down	coding	1057
227165_at	SKA3	NM_001166017	spindle and kinetochore associated complex subunit 3	5.86484	5.55512	4.79475	1.23946	3.5e-05	0.001087	up	coding	1058
210105_s_at	FYN	NM_001242779	FYN oncogene related to SRC, FGR, YES	11.3073	11.6074	-4.53559	-1.23124	3.5e-05	0.001087	down	coding	1059
211088_s_at	PLK4	NM_001190799	polo-like kinase 4	3.93852	3.76301	4.41915	1.12936	3.5e-05	0.001087	up	coding	1060
200741_s_at	RPS27	NM_001030	ribosomal protein S27	14.0686	14.1484	-4.42428	-1.05685	3.5e-05	0.001087	down	coding	1061
219751_at	SETD6	NM_001160305	SET domain containing 6	7.3023	7.78722	-4.68894	-1.39951	3.5e-05	0.001094	down	coding	1062
227697_at	SOCS3	NM_003955	suppressor of cytokine signaling 3	9.69447	8.93595	4.58014	1.69175	3.5e-05	0.001099	up	coding	1063
220840_s_at	C1orf112	NM_018186	chromosome 1 open reading frame 112	5.13747	4.83424	4.34469	1.23391	3.5e-05	0.001099	up	coding	1064
206693_at	IL7	NM_000880	interleukin 7	4.4248	5.10617	-4.92088	-1.60367	3.6e-05	0.001103	down	coding	1065
226375_at	LMTK2	NM_014916	lemur tyrosine kinase 2	8.19808	7.8306	4.58649	1.2901	3.6e-05	0.001108	up	coding	1066
213996_at	YPEL1	NM_013313	yippee-like 1 (Drosophila)	7.41448	8.1672	-4.96233	-1.68496	3.6e-05	0.001109	down	coding	1067
222036_s_at	MCM4	NM_005914	minichromosome maintenance complex component 4	7.63824	7.02792	4.5602	1.52659	3.6e-05	0.001109	up	coding	1068
229695_at	---	---	---	6.59145	6.12058	4.412	1.38595	3.6e-05	0.001109	up	coding	1069
221745_at	DCAF7	NM_001003725	DDB1 and CUL4 associated factor 7	7.58649	8.30097	-4.82476	-1.64089	3.6e-05	0.001114	down	coding	1070
1564166_s_at	LOC100630923	NR_038967	LOC100289561-PRKRIP1 readthrough	5.07022	5.28198	-4.61433	-1.1581	3.6e-05	0.001114	down	coding	1071
205147_x_at	NCF4	NM_000631	neutrophil cytosolic factor 4, 40kDa	9.43106	8.99514	4.4741	1.35277	3.6e-05	0.001116	up	coding	1072
206632_s_at	APOBEC3B	NM_001270411	apolipoprotein B mRNA editing enzyme, catalytic polypeptide-like 3B	7.49846	6.17419	4.58247	2.50406	3.6e-05	0.001117	up	coding	1073
201573_s_at	ETF1	NM_004730	eukaryotic translation termination factor 1	9.22246	8.6716	4.67232	1.46496	3.6e-05	0.001117	up	coding	1074
211509_s_at	RTN4	NM_007008	reticulon 4	11.6111	11.3702	4.44542	1.18171	3.6e-05	0.001118	up	coding	1075
1554631_at	ATM	NM_000051	ataxia telangiectasia mutated	7.06296	6.78902	4.38078	1.20911	3.7e-05	0.001119	up	coding	1076
214770_at	MSR1	NM_002445	macrophage scavenger receptor 1	4.61091	4.17087	4.32345	1.35665	3.7e-05	0.001126	up	coding	1077
1554290_at	HERC3	NM_001271602	HECT and RLD domain containing E3 ubiquitin protein ligase 3	5.70315	5.24848	4.57843	1.37048	3.7e-05	0.001127	up	coding	1078
225369_at	ESAM	NM_138961	endothelial cell adhesion molecule	6.96293	6.48645	4.52035	1.39134	3.7e-05	0.001129	up	coding	1079
213515_x_at	HBG1	NM_000184	hemoglobin, gamma A	12.6989	10.7204	4.77074	3.94072	3.7e-05	0.00113	up	coding	1080
210117_at	SPAG1	NM_003114	sperm associated antigen 1	5.40007	4.96821	4.51561	1.34897	3.7e-05	0.00113	up	coding	1081
201665_x_at	RPS17	NM_001021	ribosomal protein S17	13.7535	13.8726	-4.34051	-1.08609	3.7e-05	0.00113	down	coding	1082
228729_at	CCNB1	NM_031966	cyclin B1	4.04052	3.68454	4.36704	1.27985	3.7e-05	0.001133	up	coding	1083
1558387_at	UG0898H09	NM_001039769	uncharacterized LOC643763	3.19982	3.11117	4.54248	1.06338	3.7e-05	0.001134	up	coding	1084
217729_s_at	AES	NM_001130	amino-terminal enhancer of split	10.4908	10.8711	-4.35624	-1.30162	3.7e-05	0.001135	down	coding	1085
218107_at	WDR26	NM_001115113	WD repeat domain 26	10.3568	10.1	4.55769	1.19484	3.7e-05	0.001135	up	coding	1086
216243_s_at	IL1RN	NM_000577	interleukin 1 receptor antagonist	7.14702	6.69505	4.37677	1.3679	3.8e-05	0.001138	up	coding	1087
227416_s_at	ZCRB1	NM_033114	zinc finger CCHC-type and RNA binding motif 1	9.5511	9.16477	4.62975	1.30706	3.8e-05	0.001138	up	coding	1088
220746_s_at	UIMC1	NM_001199297	ubiquitin interaction motif containing 1	8.79098	8.59261	4.52728	1.1474	3.8e-05	0.001141	up	coding	1089
209273_s_at	ISCA1	NM_030940	iron-sulfur cluster assembly 1 homolog (S. cerevisiae)	9.24139	8.69489	4.5045	1.46054	3.8e-05	0.001142	up	coding	1090
217209_at	CEACAM3	NM_001277163	carcinoembryonic antigen-related cell adhesion molecule 3	6.33622	6.08203	4.52028	1.19266	3.8e-05	0.001142	up	coding	1091
211781_x_at	---	---	---	8.08807	7.4791	4.43544	1.52518	3.8e-05	0.001147	up	coding	1092
208353_x_at	ANK1	NM_000037	ankyrin 1, erythrocytic	6.79377	6.31647	4.39513	1.39214	3.8e-05	0.001147	up	coding	1093
226342_at	SPTBN1	NM_003128	spectrin, beta, non-erythrocytic 1	7.9777	7.34969	4.52385	1.54543	3.8e-05	0.001152	up	coding	1094
214472_at	HIST1H2AD	NM_003529	histone cluster 1, H2ad	5.25554	4.71842	4.49165	1.45108	3.8e-05	0.001152	up	coding	1095
204695_at	CDC25A	NM_001789	cell division cycle 25A	6.41194	5.92066	4.77735	1.40569	3.8e-05	0.001152	up	coding	1096
207157_s_at	GNG5	NM_005274	guanine nucleotide binding protein (G protein), gamma 5	11.5941	11.3543	4.39452	1.18087	3.8e-05	0.001152	up	coding	1097
217750_s_at	UBE2Z	NM_023079	ubiquitin-conjugating enzyme E2Z	9.23804	9.46064	-4.48275	-1.16683	3.8e-05	0.001154	down	coding	1098
AFFX-HUMGAPDH/M33197_3_at	GAPDH	NM_001256799	glyceraldehyde-3-phosphate dehydrogenase	12.9229	12.7211	4.5755	1.15014	3.8e-05	0.001154	up	coding	1099
207966_s_at	GLG1	NM_001145666	golgi glycoprotein 1	9.75087	10.3777	-4.82643	-1.54418	3.9e-05	0.001155	down	coding	1100
226550_at	SLC9A7	NM_001257291	solute carrier family 9, subfamily A (NHE7, cation proton antiporter 7), member 7	7.37057	7.98693	-4.57155	-1.53301	3.9e-05	0.001155	down	coding	1101
214958_s_at	TMC6	NM_001127198	transmembrane channel-like 6	9.20737	9.64071	-4.42259	-1.35035	3.9e-05	0.001155	down	coding	1102
205281_s_at	PIGA	NM_002641	phosphatidylinositol glycan anchor biosynthesis, class A	7.77603	7.08422	4.64377	1.61531	3.9e-05	0.001156	up	coding	1103
226272_at	RCAN3	NM_001251977	RCAN family member 3	10.778	11.2803	-4.46495	-1.41651	3.9e-05	0.001156	down	coding	1104
204420_at	FOSL1	NM_005438	FOS-like antigen 1	6.64016	6.02506	4.43804	1.53167	3.9e-05	0.001159	up	coding	1105
214883_at	THRA	NM_001190918	thyroid hormone receptor, alpha	6.52019	6.29336	4.53673	1.17026	3.9e-05	0.001164	up	coding	1106
204206_at	MNT	NM_020310	MNT, MAX dimerization protein	9.13553	8.78394	4.43958	1.27596	3.9e-05	0.001165	up	coding	1107
215233_at	JMJD6	NM_001081461	jumonji domain containing 6	6.22648	5.94455	4.47445	1.21582	3.9e-05	0.001167	up	coding	1108
244206_at	ZFAND4	NM_001128324	zinc finger, AN1-type domain 4	5.44333	5.11236	4.46518	1.25786	3.9e-05	0.001172	up	coding	1109
200841_s_at	EPRS	NM_004446	glutamyl-prolyl-tRNA synthetase	7.11988	7.66408	-4.52042	-1.45821	4e-05	0.001174	down	coding	1110
202684_s_at	RNMT	NM_003799	RNA (guanine-7-) methyltransferase	6.30607	5.79228	4.39124	1.42779	4e-05	0.001174	up	coding	1111
242957_at	VWCE	NM_152718	von Willebrand factor C and EGF domains	6.3167	6.07587	4.59457	1.18167	4e-05	0.001174	up	coding	1112
222646_s_at	ERO1L	NM_014584	ERO1-like (S. cerevisiae)	8.40017	7.83191	4.59565	1.48273	4e-05	0.00119	up	coding	1113
207484_s_at	EHMT2	NM_006709	euchromatic histone-lysine N-methyltransferase 2	7.67505	7.8968	-4.58615	-1.16615	4e-05	0.001195	down	coding	1114
1564121_at	---	---	---	4.42601	4.20232	4.50424	1.16772	4e-05	0.001196	up	coding	1115
1554408_a_at	TK1	NM_003258	thymidine kinase 1, soluble	7.40264	6.78351	4.64869	1.53594	4.1e-05	0.001198	up	coding	1116
230894_s_at	---	---	---	6.37997	6.7884	-4.53097	-1.32725	4.1e-05	0.001198	down	coding	1117
217825_s_at	UBE2J1	NM_016021	ubiquitin-conjugating enzyme E2, J1	9.53475	9.05599	4.75291	1.39355	4.1e-05	0.001205	up	coding	1118
215495_s_at	SAMD4A	NM_001161576	sterile alpha motif domain containing 4A	6.21156	5.83506	4.41896	1.29819	4.1e-05	0.001212	up	coding	1119
224964_s_at	GNG2	NM_001243773	guanine nucleotide binding protein (G protein), gamma 2	10.8141	11.1158	-4.40494	-1.2326	4.1e-05	0.001212	down	coding	1120
219996_at	ASB7	NM_024708	ankyrin repeat and SOCS box containing 7	6.7336	6.5191	4.56337	1.16031	4.1e-05	0.001212	up	coding	1121
203331_s_at	INPP5D	NM_001017915	inositol polyphosphate-5-phosphatase, 145kDa	7.785	8.06676	-4.33394	-1.21568	4.1e-05	0.001217	down	coding	1122
236241_at	MED31	NM_016060	mediator complex subunit 31	6.06543	6.64063	-4.4969	-1.48988	4.2e-05	0.00122	down	coding	1123
1565597_at	---	---	---	5.55009	5.09077	4.29969	1.3749	4.2e-05	0.001221	up	coding	1124
216505_x_at	OTTHUMG00000031646	---	NULL	10.4476	10.6714	-4.48664	-1.16777	4.2e-05	0.001221	down	coding	1125
222142_at	CYLD	NM_001042355	cylindromatosis (turban tumor syndrome)	7.28965	6.71911	4.48599	1.48508	4.2e-05	0.001226	up	coding	1126
200989_at	HIF1A	NM_001243084	hypoxia inducible factor 1, alpha subunit (basic helix-loop-helix transcription factor)	11.8425	11.3847	4.57259	1.37348	4.2e-05	0.001226	up	coding	1127
1553096_s_at	BCL2L11	NM_001204106	BCL2-like 11 (apoptosis facilitator)	8.88053	8.46198	4.70714	1.33658	4.2e-05	0.001226	up	coding	1128
235582_at	E2F2	NM_004091	E2F transcription factor 2	6.20909	5.9348	4.5462	1.2094	4.2e-05	0.001226	up	coding	1129
205821_at	KLRC4-KLRK1	NM_001199805	KLRC4-KLRK1 readthrough	10.2277	10.7862	-4.55895	-1.47274	4.2e-05	0.001228	down	coding	1130
228953_at	WHAMM	NM_001080435	WAS protein homolog associated with actin, golgi membranes and microtubules	9.36577	8.78862	4.42957	1.49191	4.2e-05	0.00123	up	coding	1131
209994_s_at	ABCB1	NM_000443	ATP-binding cassette, sub-family B (MDR/TAP), member 1	6.83682	7.34183	-4.50418	-1.41913	4.2e-05	0.00123	down	coding	1132
200858_s_at	RPS8	NM_001012	ribosomal protein S8	13.0209	13.2069	-4.32819	-1.13762	4.2e-05	0.00123	down	coding	1133
203052_at	C2	NM_000063	complement component 2	7.47415	6.99937	4.60901	1.38971	4.2e-05	0.001232	up	coding	1134
223070_at	SELK	NM_021237	selenoprotein K	10.4932	10.0677	4.42504	1.34297	4.2e-05	0.001232	up	coding	1135
203455_s_at	SAT1	NM_002970	spermidine/spermine N1-acetyltransferase 1	12.0784	11.6622	4.63631	1.33434	4.2e-05	0.001232	up	coding	1136
218683_at	PTBP2	NM_021190	polypyrimidine tract binding protein 2	7.8934	7.36506	4.51909	1.44227	4.3e-05	0.001234	up	coding	1137
227784_s_at	COG1	NM_018714	component of oligomeric golgi complex 1	8.26047	8.49488	-4.42879	-1.17642	4.3e-05	0.001236	down	coding	1138
203534_at	LSM1	NM_014462	LSM1 homolog, U6 small nuclear RNA associated (S. cerevisiae)	9.95616	9.68284	4.60798	1.20859	4.3e-05	0.00124	up	coding	1139
217256_x_at	OTTHUMG00000022555	---	NULL	11.5197	11.7073	-4.49108	-1.1389	4.3e-05	0.001243	down	coding	1140
202086_at	MX1	NM_001144925	myxovirus (influenza virus) resistance 1, interferon-inducible protein p78 (mouse)	11.1519	10.1502	4.60205	2.00232	4.3e-05	0.001246	up	coding	1141
215001_s_at	GLUL	NM_001033044	glutamate-ammonia ligase	11.804	11.145	4.70169	1.57899	4.3e-05	0.001246	up	coding	1142
219371_s_at	KLF2	NM_016270	Kruppel-like factor 2 (lung)	12.1454	12.4886	-4.60772	-1.26853	4.3e-05	0.001248	down	coding	1143
216191_s_at	TRDV3	---	T cell receptor delta variable 3	9.37184	10.1979	-4.45217	-1.77289	4.3e-05	0.001249	down	coding	1144
225195_at	DPH3	NM_001047434	DPH3, KTI11 homolog (S. cerevisiae)	7.63861	7.13156	4.53028	1.42114	4.4e-05	0.001255	up	coding	1145
205769_at	SLC27A2	NM_001159629	solute carrier family 27 (fatty acid transporter), member 2	5.1321	4.81153	4.36674	1.24883	4.4e-05	0.001255	up	coding	1146
219352_at	HERC6	NM_001013000	HECT and RLD domain containing E3 ubiquitin protein ligase family member 6	8.4396	7.59169	4.47121	1.79988	4.4e-05	0.001257	up	coding	1147
231417_at	---	---	---	4.09121	3.94474	4.56461	1.10686	4.4e-05	0.001257	up	coding	1148
201216_at	ERP29	NM_001034025	endoplasmic reticulum protein 29	11.1141	11.2994	-4.32992	-1.13706	4.4e-05	0.00126	down	coding	1149
216490_x_at	RPLP2P1	---	ribosomal protein, large P2, pseudogene 1	6.47363	6.83228	-4.66922	-1.28223	4.4e-05	0.001271	down	coding	1150
229707_at	ZNF606	NM_025027	zinc finger protein 606	7.24015	7.65076	-4.46804	-1.32925	4.5e-05	0.001282	down	coding	1151
232440_at	ZDHHC13	NM_001001483	zinc finger, DHHC-type containing 13	5.6247	6.07978	-4.59372	-1.37086	4.5e-05	0.001288	down	coding	1152
213474_at	KCTD7	NM_001167961	potassium channel tetramerisation domain containing 7	7.63501	7.97888	-4.58626	-1.26916	4.5e-05	0.001288	down	coding	1153
227522_at	CMBL	NM_138809	carboxymethylenebutenolidase homolog (Pseudomonas)	4.71327	4.4049	4.30935	1.23831	4.5e-05	0.001288	up	coding	1154
233371_at	ABCC13	NM_138726	ATP-binding cassette, sub-family C (CFTR/MRP), member 13, pseudogene	5.76516	5.07108	4.28175	1.61784	4.5e-05	0.00129	up	coding	1155
210837_s_at	PDE4D	NM_001104631	phosphodiesterase 4D, cAMP-specific	5.68107	5.04974	4.54489	1.54899	4.5e-05	0.00129	up	coding	1156
201095_at	DAP	NM_004394	death-associated protein	9.32086	9.02112	4.46402	1.23092	4.5e-05	0.00129	up	coding	1157
203921_at	CHST2	NM_004267	carbohydrate (N-acetylglucosamine-6-O) sulfotransferase 2	9.4543	9.83461	-4.39245	-1.30162	4.5e-05	0.001291	down	coding	1158
222418_s_at	TMEM43	NM_024334	transmembrane protein 43	8.10044	8.43636	-4.50018	-1.26218	4.5e-05	0.001293	down	coding	1159
224739_at	PIM3	NM_001001852	pim-3 oncogene	10.8016	10.2016	4.63916	1.51573	4.6e-05	0.001295	up	coding	1160
222608_s_at	ANLN	NM_018685	anillin, actin binding protein	4.24321	3.80334	4.39171	1.35648	4.6e-05	0.001295	up	coding	1161
1556697_at	GPRIN3	NM_198281	GPRIN family member 3	3.89831	3.66133	4.29381	1.17853	4.6e-05	0.001295	up	coding	1162
1556571_at	LOC100506538	NM_152416	uncharacterized LOC100506538	3.85008	3.74092	4.35888	1.0786	4.6e-05	0.001295	up	coding	1163
227592_at	ALDH16A1	NM_001145396	aldehyde dehydrogenase 16 family, member A1	8.30003	8.57366	-4.28903	-1.20884	4.6e-05	0.001299	down	coding	1164
212374_at	FEM1B	NM_015322	fem-1 homolog b (C. elegans)	7.71849	7.19849	4.65955	1.43396	4.6e-05	0.0013	up	coding	1165
201758_at	TSG101	NM_006292	tumor susceptibility gene 101	9.55782	9.21176	4.60388	1.27109	4.6e-05	0.001307	up	coding	1166
203554_x_at	PTTG1	NM_004219	pituitary tumor-transforming 1	9.22699	8.72931	4.56232	1.41194	4.6e-05	0.001312	up	coding	1167
213639_s_at	ZNF500	NM_021646	zinc finger protein 500	7.09074	7.42494	-4.38824	-1.26068	4.6e-05	0.001312	down	coding	1168
1566624_at	---	---	---	3.37922	3.27238	4.48746	1.07687	4.7e-05	0.001314	up	coding	1169
203246_s_at	NPRL2	NM_006545	nitrogen permease regulator-like 2 (S. cerevisiae)	8.92927	9.25311	-4.3927	-1.25165	4.7e-05	0.001315	down	coding	1170
200077_s_at	OAZ1	NM_004152	ornithine decarboxylase antizyme 1	13.4868	13.3422	4.47094	1.1054	4.7e-05	0.001324	up	coding	1171
240723_at	---	---	---	6.76357	7.17483	-4.45101	-1.32984	4.7e-05	0.001333	down	coding	1172
222154_s_at	SPATS2L	NM_001100422	spermatogenesis associated, serine-rich 2-like	8.28885	7.50884	4.49473	1.71714	4.8e-05	0.001349	up	coding	1173
218115_at	ASF1B	NM_018154	anti-silencing function 1B histone chaperone	7.20223	6.82928	4.38642	1.295	4.8e-05	0.00135	up	coding	1174
210112_at	HPS1	NM_000195	Hermansky-Pudlak syndrome 1	8.10334	7.77637	4.32816	1.25438	4.8e-05	0.001357	up	coding	1175
217379_at	OTTHUMG00000014474	---	NULL	11.2716	11.5823	-4.45182	-1.24031	4.9e-05	0.001369	down	coding	1176
223643_at	CRYGS	NM_017541	crystallin, gamma S	5.00259	5.38754	-4.60054	-1.30582	4.9e-05	0.001372	down	coding	1177
217546_at	MT1M	NM_176870	metallothionein 1M	4.54361	4.30554	4.27058	1.17941	4.9e-05	0.001373	up	coding	1178
223586_at	ARNTL2	NM_001248002	aryl hydrocarbon receptor nuclear translocator-like 2	5.65546	5.39125	4.75527	1.20098	5e-05	0.001389	up	coding	1179
235250_at	FLCN	NM_144606	folliculin	6.50305	6.10984	4.5229	1.31332	5e-05	0.001391	up	coding	1180
229109_s_at	BLVRA	NM_000712	biliverdin reductase A	5.77582	5.43478	4.2968	1.26667	5e-05	0.001398	up	coding	1181
227530_at	AKAP12	NM_005100	A kinase (PRKA) anchor protein 12	5.46767	5.85299	-4.70067	-1.30615	5e-05	0.001409	down	coding	1182
208816_x_at	ANXA2P2	NR_003573	annexin A2 pseudogene 2	9.96139	9.64559	4.29047	1.2447	5.1e-05	0.001409	up	coding	1183
209555_s_at	CD36	NM_000072	CD36 molecule (thrombospondin receptor)	9.65398	8.91767	4.48315	1.66591	5.1e-05	0.001417	up	coding	1184
226275_at	MXD1	NM_001202513	MAX dimerization protein 1	9.44248	8.7262	4.57938	1.64294	5.1e-05	0.001417	up	coding	1185
221237_s_at	OSBP2	NM_030758	oxysterol binding protein 2	7.12903	6.68213	4.5252	1.36311	5.1e-05	0.001417	up	coding	1186
204891_s_at	LCK	NM_001042771	lymphocyte-specific protein tyrosine kinase	11.2072	11.6362	-4.33377	-1.34627	5.1e-05	0.001417	down	coding	1187
201481_s_at	PYGB	NM_002862	phosphorylase, glycogen; brain	8.68176	8.98636	-4.37587	-1.23508	5.1e-05	0.001417	down	coding	1188
212656_at	TSFM	NM_001172695	Ts translation elongation factor, mitochondrial	8.38767	8.12403	4.58985	1.2005	5.1e-05	0.001417	up	coding	1189
219306_at	KIF15	NM_020242	kinesin family member 15	5.09319	4.62584	4.34711	1.38257	5.2e-05	0.001427	up	coding	1190
219394_at	PGS1	NM_024419	phosphatidylglycerophosphate synthase 1	8.98878	8.63656	4.3524	1.27652	5.2e-05	0.001427	up	coding	1191
213657_s_at	OTTHUMG00000172032	---	NULL	7.19649	7.46436	-4.4771	-1.20403	5.2e-05	0.001427	down	coding	1192
1554072_s_at	CCDC67	NM_181645	coiled-coil domain containing 67	3.22965	3.14894	4.40729	1.05754	5.2e-05	0.001431	up	coding	1193
227394_at	NCAM1	NM_000615	neural cell adhesion molecule 1	7.09268	7.62139	-4.63027	-1.44264	5.2e-05	0.001433	down	coding	1194
210262_at	CRISP2	NM_001142407	cysteine-rich secretory protein 2	3.91546	3.72217	4.36144	1.14337	5.2e-05	0.001433	up	coding	1195
201319_at	MYL12A	NM_006471	myosin, light chain 12A, regulatory, non-sarcomeric	11.332	11.1336	4.38717	1.14744	5.2e-05	0.001436	up	coding	1196
226583_at	C12orf76	NM_207435	chromosome 12 open reading frame 76	8.35335	7.88829	4.37067	1.38037	5.2e-05	0.001439	up	coding	1197
202568_s_at	MARK3	NM_001128918	MAP/microtubule affinity-regulating kinase 3	8.50326	8.16308	4.38565	1.26592	5.2e-05	0.001439	up	coding	1198
201258_at	RPS16	NM_001020	ribosomal protein S16	13.2013	13.3867	-4.30705	-1.13716	5.2e-05	0.001443	down	coding	1199
211825_s_at	FLI1	NM_001167681	Friend leukemia virus integration 1	8.63137	9.06302	-4.29447	-1.34878	5.3e-05	0.001444	down	coding	1200
206751_s_at	PCYT1B	NM_001163264	phosphate cytidylyltransferase 1, choline, beta	4.50629	4.27222	4.28652	1.17614	5.3e-05	0.001445	up	coding	1201
220658_s_at	ARNTL2	NM_001248002	aryl hydrocarbon receptor nuclear translocator-like 2	4.60121	4.39958	4.34463	1.15	5.3e-05	0.001445	up	coding	1202
211822_s_at	NLRP1	NM_001033053	NLR family, pyrin domain containing 1	8.77249	9.08986	-4.27159	-1.24605	5.3e-05	0.001447	down	coding	1203
208066_s_at	GTF2B	NM_001514	general transcription factor IIB	9.61174	9.12144	4.5782	1.40473	5.3e-05	0.001449	up	coding	1204
215784_at	CD1E	NM_001042583	CD1e molecule	4.12602	4.59063	-4.84534	-1.37995	5.3e-05	0.001449	down	coding	1205
244794_at	---	---	---	4.75343	5.13757	-4.50757	-1.30507	5.3e-05	0.001449	down	coding	1206
1564028_s_at	FAM115C	NM_001130025	family with sequence similarity 115, member C	5.30431	5.09717	4.26982	1.1544	5.3e-05	0.00145	up	coding	1207
202193_at	LIMK2	NM_001031801	LIM domain kinase 2	6.88293	6.29625	4.3635	1.50178	5.3e-05	0.001451	up	coding	1208
221757_at	PIK3IP1	NM_001135911	phosphoinositide-3-kinase interacting protein 1	9.89591	10.3674	-4.3486	-1.38655	5.3e-05	0.001451	down	coding	1209
208631_s_at	HADHA	NM_000182	hydroxyacyl-CoA dehydrogenase/3-ketoacyl-CoA thiolase/enoyl-CoA hydratase (trifunctional protein), alpha subunit	10.1141	10.4093	-4.35066	-1.22704	5.3e-05	0.001451	down	coding	1210
202809_s_at	INTS3	NM_023015	integrator complex subunit 3	8.91406	9.12796	-4.30786	-1.15982	5.3e-05	0.001451	down	coding	1211
228056_s_at	NAPSB	NR_002798	napsin B aspartic peptidase, pseudogene	7.81933	8.39956	-4.33902	-1.49509	5.4e-05	0.001458	down	coding	1212
223825_at	KIAA1432	NM_001135920	KIAA1432	3.74283	3.56747	4.35653	1.12925	5.4e-05	0.001458	up	coding	1213
1555594_a_at	MBNL1	NM_021038	muscleblind-like splicing regulator 1	7.76314	8.57066	-4.436	-1.7502	5.4e-05	0.001465	down	coding	1214
216438_s_at	TMSB4X	NM_021109	thymosin beta 4, X-linked	13.8332	13.7463	4.24399	1.06213	5.4e-05	0.001471	up	coding	1215
213608_s_at	SRRD	NM_001013694	SRR1 domain containing	7.62383	7.33692	4.30017	1.22003	5.4e-05	0.001477	up	coding	1216
211307_s_at	FCAR	NM_002000	Fc fragment of IgA, receptor for	7.0841	6.31589	4.31549	1.70317	5.5e-05	0.001478	up	coding	1217
221837_at	KLHL22	NM_032775	kelch-like family member 22	6.47269	6.85551	-4.44985	-1.30389	5.5e-05	0.001479	down	coding	1218
235512_at	CDKL1	NM_004196	cyclin-dependent kinase-like 1 (CDC2-related kinase)	6.22617	5.88733	4.45336	1.26475	5.5e-05	0.001481	up	coding	1219
222689_at	ACER3	NM_018367	alkaline ceramidase 3	7.90867	7.34872	4.38718	1.47422	5.5e-05	0.001492	up	coding	1220
228257_at	ANKRD52	NM_173595	ankyrin repeat domain 52	7.95296	7.69299	4.42912	1.19746	5.5e-05	0.001492	up	coding	1221
212303_x_at	KHSRP	NM_003685	KH-type splicing regulatory protein	8.11596	7.87618	4.37333	1.18081	5.6e-05	0.0015	up	coding	1222
223694_at	TRIM7	NM_033342	tripartite motif containing 7	6.44877	6.12772	4.53815	1.24924	5.6e-05	0.001502	up	coding	1223
1552583_s_at	ABCC13	NM_138726	ATP-binding cassette, sub-family C (CFTR/MRP), member 13, pseudogene	5.45839	4.88634	4.23001	1.48663	5.6e-05	0.001507	up	coding	1224
226878_at	HLA-DOA	NM_002119	major histocompatibility complex, class II, DO alpha	8.38565	8.94523	-4.54319	-1.47384	5.6e-05	0.001507	down	coding	1225
226390_at	STARD4	NM_139164	StAR-related lipid transfer (START) domain containing 4	7.73147	7.40973	4.29492	1.24984	5.6e-05	0.001507	up	coding	1226
200738_s_at	PGK1	NM_000291	phosphoglycerate kinase 1	12.1815	12.0045	4.30813	1.13051	5.6e-05	0.001507	up	coding	1227
203725_at	GADD45A	NM_001199741	growth arrest and DNA-damage-inducible, alpha	9.07799	8.36425	4.52694	1.64005	5.6e-05	0.001514	up	coding	1228
204557_s_at	DZIP1	NM_014934	DAZ interacting zinc finger protein 1	3.3667	3.29221	4.3647	1.05299	5.6e-05	0.001514	up	coding	1229
209911_x_at	HIST1H2BD	NM_021063	histone cluster 1, H2bd	8.84417	8.34979	4.3765	1.40871	5.7e-05	0.001516	up	coding	1230
1562505_at	---	---	---	6.40899	6.08145	4.4824	1.25487	5.7e-05	0.001526	up	coding	1231
212967_x_at	NAP1L1	NM_004537	nucleosome assembly protein 1-like 1	12.0127	12.2355	-4.21177	-1.16694	5.7e-05	0.001536	down	coding	1232
223670_s_at	HEMGN	NM_018437	hemogen	6.78333	5.96193	4.20521	1.76712	5.8e-05	0.001539	up	coding	1233
205020_s_at	ARL4A	NM_001037164	ADP-ribosylation factor-like 4A	8.91863	8.31285	4.55626	1.5218	5.8e-05	0.001539	up	coding	1234
226509_at	ZNF641	NM_001172681	zinc finger protein 641	8.52779	8.8518	-4.44126	-1.2518	5.8e-05	0.001539	down	coding	1235
231715_s_at	PYCR2	NM_001271681	pyrroline-5-carboxylate reductase family, member 2	8.78518	9.04461	-4.33912	-1.19701	5.8e-05	0.001539	down	coding	1236
206130_s_at	ASGR2	NM_001181	asialoglycoprotein receptor 2	8.98409	8.3383	4.43888	1.5646	5.8e-05	0.001542	up	coding	1237
211010_s_at	NCR3	NM_001145466	natural cytotoxicity triggering receptor 3	7.19303	7.5395	-4.41686	-1.27144	5.8e-05	0.001542	down	coding	1238
207236_at	ZNF345	NM_001242472	zinc finger protein 345	5.1569	5.80388	-4.67607	-1.56589	5.8e-05	0.001546	down	coding	1239
200958_s_at	SDCBP	NM_001007067	syndecan binding protein (syntenin)	11.861	11.5805	4.37254	1.2146	5.8e-05	0.00155	up	coding	1240
231219_at	CMTM1	NM_052999	CKLF-like MARVEL transmembrane domain containing 1	6.36788	6.06504	4.3311	1.23357	5.8e-05	0.001551	up	coding	1241
203574_at	NFIL3	NM_005384	nuclear factor, interleukin 3 regulated	9.82428	8.82738	4.48804	1.9957	5.9e-05	0.001555	up	coding	1242
1552656_s_at	UHMK1	NM_001184763	U2AF homology motif (UHM) kinase 1	6.92389	7.4835	-4.65186	-1.47387	5.9e-05	0.001559	down	coding	1243
207674_at	FCAR	NM_002000	Fc fragment of IgA, receptor for	7.55885	6.44937	4.47336	2.15767	5.9e-05	0.001565	up	coding	1244
1552309_a_at	NEXN	NM_001172309	nexilin (F actin binding protein)	7.29527	6.4939	4.38678	1.74276	5.9e-05	0.001565	up	coding	1245
224888_at	EPT1	NM_033505	ethanolaminephosphotransferase 1 (CDP-ethanolamine-specific)	7.67228	7.42808	4.49386	1.18444	5.9e-05	0.001565	up	coding	1246
239012_at	RNF144B	NM_182757	ring finger protein 144B	8.23923	8.69686	-4.35522	-1.37328	5.9e-05	0.001567	down	coding	1247
216880_at	RAD51B	NM_002877	RAD51 homolog B (S. cerevisiae)	4.543	4.3694	4.32005	1.12787	5.9e-05	0.001572	up	coding	1248
207850_at	CXCL3	NM_002090	chemokine (C-X-C motif) ligand 3	5.64647	5.00617	4.22032	1.55866	6e-05	0.001574	up	coding	1249
215723_s_at	PLD1	NM_001130081	phospholipase D1, phosphatidylcholine-specific	4.21445	3.97748	4.22914	1.17851	6e-05	0.001582	up	coding	1250
238343_x_at	OTTHUMG00000156694	---	NULL	3.5478	3.42121	4.20995	1.09171	6e-05	0.001582	up	coding	1251
227250_at	KREMEN1	NM_001039570	kringle containing transmembrane protein 1	5.5067	5.16793	4.28434	1.26467	6e-05	0.001583	up	coding	1252
226574_at	PSPC1	NM_001042414	paraspeckle component 1	8.78796	8.54968	4.25825	1.17958	6e-05	0.001583	up	coding	1253
218020_s_at	ZFAND3	NM_021943	zinc finger, AN1-type domain 3	8.4564	8.27366	4.24708	1.13504	6e-05	0.001583	up	coding	1254
206559_x_at	---	---	---	14.1476	14.2943	-4.51849	-1.10701	6e-05	0.001583	down	coding	1255
223178_s_at	NT5DC1	NM_152729	5'-nucleotidase domain containing 1	7.22785	7.75572	-4.38771	-1.4418	6.1e-05	0.001589	down	coding	1256
228157_at	ZNF207	NM_001032293	zinc finger protein 207	8.1538	8.94348	-4.27451	-1.72869	6.1e-05	0.001593	down	coding	1257
221418_s_at	MED16	NM_005481	mediator complex subunit 16	7.27546	7.55579	-4.28996	-1.21447	6.1e-05	0.001599	down	coding	1258
233177_s_at	PNKD	NM_001077399	paroxysmal nonkinesigenic dyskinesia	8.49988	7.99647	4.38679	1.41755	6.1e-05	0.001602	up	coding	1259
218945_at	METTL22	NM_024109	methyltransferase like 22	7.85607	7.43669	4.64832	1.33735	6.1e-05	0.001604	up	coding	1260
201930_at	MCM6	NM_005915	minichromosome maintenance complex component 6	9.56898	8.97618	4.4892	1.50817	6.1e-05	0.001605	up	coding	1261
203445_s_at	CTDSP2	NM_005730	CTD (carboxy-terminal domain, RNA polymerase II, polypeptide A) small phosphatase 2	10.2176	10.4685	-4.33949	-1.18996	6.1e-05	0.001605	down	coding	1262
226817_at	DSC2	NM_004949	desmocollin 2	8.09481	7.34801	4.39602	1.67807	6.2e-05	0.001607	up	coding	1263
202583_s_at	RANBP9	NM_005493	RAN binding protein 9	8.5261	8.16359	4.3679	1.28566	6.2e-05	0.001609	up	coding	1264
215128_at	---	---	---	6.2323	6.54989	-4.43818	-1.24625	6.2e-05	0.001609	down	coding	1265
210821_x_at	CENPA	NM_001042426	centromere protein A	6.29616	6.08419	4.35369	1.15826	6.2e-05	0.001609	up	coding	1266
201642_at	IFNGR2	NM_005534	interferon gamma receptor 2 (interferon gamma transducer 1)	10.6307	10.3365	4.23891	1.22619	6.3e-05	0.001627	up	coding	1267
240286_at	---	---	---	5.79307	6.15806	-4.50469	-1.28787	6.3e-05	0.001629	down	coding	1268
217682_at	OTTHUMG00000178148	---	NULL	8.48275	7.92511	4.41707	1.47186	6.3e-05	0.001631	up	coding	1269
228548_at	RAP1A	NM_001010935	RAP1A, member of RAS oncogene family	7.558	7.98498	-4.47714	-1.34442	6.3e-05	0.001631	down	coding	1270
223613_at	UQCR11	NM_006830	ubiquinol-cytochrome c reductase, complex III subunit XI	7.6234	7.81653	-4.45902	-1.14325	6.3e-05	0.001631	down	coding	1271
207031_at	NKX3-2	NM_001189	NK3 homeobox 2	4.48787	4.30781	4.3105	1.13293	6.3e-05	0.001631	up	coding	1272
225896_at	MPRIP	NM_015134	myosin phosphatase Rho interacting protein	6.78402	7.13575	-4.39555	-1.27608	6.3e-05	0.001632	down	coding	1273
212314_at	SEL1L3	NM_015187	sel-1 suppressor of lin-12-like 3 (C. elegans)	9.02643	9.61469	-4.41605	-1.50343	6.3e-05	0.001638	down	coding	1274
202897_at	SIRPA	NM_001040022	signal-regulatory protein alpha	8.68295	8.10213	4.36789	1.4957	6.3e-05	0.001641	up	coding	1275
225368_at	HIPK2	NM_001113239	homeodomain interacting protein kinase 2	9.27692	9.6364	-4.41049	-1.28296	6.3e-05	0.001641	down	coding	1276
205241_at	SCO2	NM_001169109	SCO2 cytochrome c oxidase assembly protein	10.3104	9.44828	4.5346	1.8177	6.4e-05	0.001642	up	coding	1277
218726_at	HJURP	NM_018410	Holliday junction recognition protein	6.27288	5.88928	4.4313	1.3046	6.4e-05	0.001661	up	coding	1278
223093_at	ANKH	NM_054027	ankylosis, progressive homolog (mouse)	6.58987	7.23032	-4.62812	-1.55882	6.5e-05	0.001663	down	coding	1279
238490_at	KIAA2026	NM_001017969	KIAA2026	7.52973	7.95564	-4.59711	-1.34342	6.5e-05	0.001669	down	coding	1280
231384_at	GRIN2A	NM_000833	glutamate receptor, ionotropic, N-methyl D-aspartate 2A	3.33899	3.24747	4.27563	1.0655	6.5e-05	0.00167	up	coding	1281
1555833_a_at	IRGQ	NM_001007561	immunity-related GTPase family, Q	7.81696	7.45343	4.33366	1.28658	6.5e-05	0.001673	up	coding	1282
218531_at	TMEM134	NM_001078650	transmembrane protein 134	8.22962	8.61629	-4.44905	-1.30737	6.5e-05	0.001674	down	coding	1283
204992_s_at	PFN2	NM_002628	profilin 2	6.2009	6.72755	-4.53421	-1.44059	6.5e-05	0.001678	down	coding	1284
235235_s_at	PATL1	NM_152716	protein associated with topoisomerase II homolog 1 (yeast)	7.44726	7.13552	4.29153	1.24121	6.5e-05	0.001678	up	coding	1285
228412_at	LOC643072	XR_108434	uncharacterized LOC643072	5.78008	5.42104	4.19966	1.28257	6.5e-05	0.00168	up	coding	1286
1568733_at	C10orf76	NM_024541	chromosome 10 open reading frame 76	7.33865	6.95461	4.3399	1.30499	6.6e-05	0.001682	up	coding	1287
215150_at	YOD1	NM_001276320	YOD1 deubiquitinase	5.40901	4.88722	4.18516	1.43574	6.6e-05	0.001699	up	coding	1288
227991_x_at	ZBTB43	NM_001135776	zinc finger and BTB domain containing 43	7.86756	7.39389	4.32782	1.38864	6.6e-05	0.001699	up	coding	1289
201577_at	NME1	NM_000269	NME/NM23 nucleoside diphosphate kinase 1	9.26349	8.87095	4.38908	1.3127	6.6e-05	0.0017	up	coding	1290
1554089_s_at	SBDS	NM_016038	Shwachman-Bodian-Diamond syndrome	9.66632	9.05944	4.27141	1.52297	6.7e-05	0.001706	up	coding	1291
207828_s_at	CENPF	NM_016343	centromere protein F, 350/400kDa	7.61328	7.16136	4.34881	1.36786	6.7e-05	0.001706	up	coding	1292
205838_at	GYPA	NM_002099	glycophorin A (MNS blood group)	4.85656	4.37591	4.164	1.39538	6.7e-05	0.001709	up	coding	1293
209395_at	CHI3L1	NM_001276	chitinase 3-like 1 (cartilage glycoprotein-39)	7.01525	5.82142	4.23729	2.28759	6.7e-05	0.001711	up	coding	1294
221478_at	BNIP3L	NM_004331	BCL2/adenovirus E1B 19kDa interacting protein 3-like	10.6628	10.1654	4.25139	1.41164	6.7e-05	0.001714	up	coding	1295
200633_at	UBB	NM_018955	ubiquitin B	13.5776	13.3469	4.2964	1.17344	6.7e-05	0.001714	up	coding	1296
206059_at	ZNF91	NM_003430	zinc finger protein 91	10.2622	10.8033	-4.28424	-1.4551	6.8e-05	0.001715	down	coding	1297
209054_s_at	WHSC1	NM_001042424	Wolf-Hirschhorn syndrome candidate 1	8.19989	7.97614	4.47323	1.16776	6.8e-05	0.001715	up	coding	1298
204242_s_at	ACOX3	NM_001101667	acyl-CoA oxidase 3, pristanoyl	6.90013	7.06549	-4.21102	-1.12145	6.7e-05	0.001715	down	coding	1299
209993_at	ABCB1	NM_000927	ATP-binding cassette, sub-family B (MDR/TAP), member 1	6.24215	6.80172	-4.44133	-1.47383	6.8e-05	0.001716	down	coding	1300
1554006_a_at	LLGL2	NM_001015002	lethal giant larvae homolog 2 (Drosophila)	5.95955	6.23442	-4.55995	-1.20989	6.8e-05	0.001717	down	coding	1301
227018_at	DPP8	NM_017743	dipeptidyl-peptidase 8	7.90625	7.64561	4.24198	1.19801	6.8e-05	0.001717	up	coding	1302
208774_at	CSNK1D	NM_001893	casein kinase 1, delta	9.10843	9.45389	-4.29754	-1.27056	6.8e-05	0.001728	down	coding	1303
213556_at	PINLYP	NM_001193621	phospholipase A2 inhibitor and LY6/PLAUR domain containing	6.53094	6.27592	4.41763	1.19335	6.8e-05	0.001728	up	coding	1304
1552902_a_at	FOXP2	NM_001172766	forkhead box P2	5.59872	5.38209	4.42285	1.16201	6.9e-05	0.001732	up	coding	1305
1563392_at	---	---	---	3.77396	3.65537	4.27579	1.08567	6.9e-05	0.001751	up	coding	1306
231776_at	EOMES	NM_001278182	eomesodermin	8.04759	8.82547	-4.40597	-1.71461	7e-05	0.001753	down	coding	1307
219733_s_at	SLC27A5	NM_012254	solute carrier family 27 (fatty acid transporter), member 5	7.00351	7.13807	-4.17995	-1.09776	6.9e-05	0.001753	down	coding	1308
208977_x_at	TUBB4B	NM_006088	tubulin, beta 4B class IVb	9.74102	9.29719	4.54175	1.36021	7e-05	0.001754	up	coding	1309
1557400_at	---	---	---	5.90236	6.18926	-4.49368	-1.22001	7e-05	0.001754	down	coding	1310
227368_at	---	---	---	9.05574	8.55907	4.47584	1.41095	7e-05	0.001762	up	coding	1311
218585_s_at	DTL	NM_016448	denticleless E3 ubiquitin protein ligase homolog (Drosophila)	6.59191	5.6454	4.50295	1.92719	7e-05	0.001767	up	coding	1312
230048_at	IFRD1	NM_001007245	interferon-related developmental regulator 1	7.18405	6.51636	4.48921	1.58852	7e-05	0.001767	up	coding	1313
201739_at	SGK1	NM_001143676	serum/glucocorticoid regulated kinase 1	10.34	9.53902	4.43526	1.74229	7.1e-05	0.001773	up	coding	1314
225799_at	LINC00152	NM_052871	long intergenic non-protein coding RNA 152	9.44929	8.93684	4.40139	1.42648	7.1e-05	0.001773	up	coding	1315
227486_at	NT5E	NM_001204813	5'-nucleotidase, ecto (CD73)	6.75991	7.20577	-4.46409	-1.36212	7.1e-05	0.001774	down	coding	1316
1561654_at	---	---	---	5.4312	5.05652	4.15015	1.29655	7.1e-05	0.001775	up	coding	1317
200008_s_at	GDI2	NM_001115156	GDP dissociation inhibitor 2	10.2682	10.5713	-4.14806	-1.23385	7.1e-05	0.001775	down	coding	1318
201032_at	BLCAP	NM_001167820	bladder cancer associated protein	9.3901	9.66572	-4.19984	-1.21052	7.1e-05	0.001775	down	coding	1319
1553651_at	C18orf54	NM_173529	chromosome 18 open reading frame 54	3.70189	3.58846	4.33816	1.08179	7.1e-05	0.001776	up	coding	1320
1554272_at	ERAP2	NM_001130140	endoplasmic reticulum aminopeptidase 2	3.55998	3.46064	4.30044	1.07129	7.1e-05	0.001778	up	coding	1321
212873_at	HMHA1	NM_001258328	histocompatibility (minor) HA-1	11.1061	11.3977	-4.29476	-1.22401	7.1e-05	0.00178	down	coding	1322
203370_s_at	PDLIM7	NM_005451	PDZ and LIM domain 7 (enigma)	7.47025	7.03575	4.27315	1.35144	7.2e-05	0.001783	up	coding	1323
225418_at	PVRL2	NM_001042724	poliovirus receptor-related 2 (herpesvirus entry mediator B)	7.83686	7.45989	4.4213	1.29861	7.2e-05	0.001783	up	coding	1324
1552632_a_at	ARSG	NM_001267727	arylsulfatase G	6.38536	6.62513	-4.30414	-1.1808	7.2e-05	0.001783	down	coding	1325
219594_at	NINJ2	NM_016533	ninjurin 2	8.03989	7.61886	4.36104	1.33889	7.2e-05	0.001784	up	coding	1326
231269_at	ASCC3	NM_006828	activating signal cointegrator 1 complex subunit 3	6.91585	6.53189	4.33314	1.30492	7.2e-05	0.001784	up	coding	1327
208641_s_at	RAC1	NM_006908	ras-related C3 botulinum toxin substrate 1 (rho family, small GTP binding protein Rac1)	11.2913	10.965	4.48298	1.25374	7.2e-05	0.001784	up	coding	1328
236835_at	FUT8-AS1	NR_024334	FUT8 antisense RNA 1	4.36993	4.60761	-4.41172	-1.1791	7.2e-05	0.001789	down	coding	1329
212475_at	AVL9	NM_015060	AVL9 homolog (S. cerevisiase)	7.48215	7.28159	4.28291	1.14915	7.2e-05	0.001794	up	coding	1330
219628_at	ZMAT3	NM_022470	zinc finger, matrin-type 3	8.5702	8.99716	-4.42673	-1.34439	7.3e-05	0.001798	down	coding	1331
1569856_at	TPP2	NM_003291	tripeptidyl peptidase II	6.60448	5.95958	4.33162	1.56363	7.3e-05	0.001799	up	coding	1332
239317_at	AC006129.2	---	NULL	5.42769	6.05361	-4.60621	-1.54319	7.3e-05	0.001799	down	coding	1333
209124_at	MYD88	NM_001172566	myeloid differentiation primary response 88	11.5677	11.2912	4.23286	1.21125	7.3e-05	0.001799	up	coding	1334
203749_s_at	RARA	NM_000964	retinoic acid receptor, alpha	8.31612	7.88964	4.38641	1.34395	7.4e-05	0.001812	up	coding	1335
211434_s_at	CCRL2	NM_001130910	chemokine (C-C motif) receptor-like 2	6.6586	6.25438	4.37522	1.32338	7.4e-05	0.001812	up	coding	1336
212221_x_at	IDS	NM_000202	iduronate 2-sulfatase	9.77595	10.0505	-4.33976	-1.20962	7.3e-05	0.001812	down	coding	1337
237411_at	ADAMTS6	NM_197941	ADAM metallopeptidase with thrombospondin type 1 motif, 6	5.73174	5.47364	4.25985	1.1959	7.3e-05	0.001812	up	coding	1338
225716_at	BRI3BP	NM_080626	BRI3 binding protein	7.82841	8.41775	-4.32321	-1.50455	7.4e-05	0.001813	down	coding	1339
210370_s_at	LY9	NM_001033667	lymphocyte antigen 9	7.807	8.24742	-4.29492	-1.357	7.4e-05	0.001813	down	coding	1340
202619_s_at	PLOD2	NM_000935	procollagen-lysine, 2-oxoglutarate 5-dioxygenase 2	5.15108	4.82783	4.30758	1.25114	7.4e-05	0.001813	up	coding	1341
202621_at	IRF3	NM_001197122	interferon regulatory factor 3	9.36905	9.67908	-4.30853	-1.23974	7.4e-05	0.001813	down	coding	1342
209394_at	ASMTL	NM_001173473	acetylserotonin O-methyltransferase-like	8.3941	8.66401	-4.30146	-1.20574	7.4e-05	0.001813	down	coding	1343
202708_s_at	HIST2H2BE	NM_003528	histone cluster 2, H2be	9.46612	8.55491	4.61169	1.88062	7.4e-05	0.001827	up	coding	1344
223436_s_at	TRPT1	NM_001033678	tRNA phosphotransferase 1	8.03722	8.22556	-4.22047	-1.13945	7.4e-05	0.001827	down	coding	1345
205819_at	MARCO	NM_006770	macrophage receptor with collagenous structure	7.78992	7.07366	4.49924	1.64292	7.5e-05	0.001828	up	coding	1346
221484_at	B4GALT5	NM_004776	UDP-Gal:betaGlcNAc beta 1,4- galactosyltransferase, polypeptide 5	8.66466	8.11458	4.33776	1.46417	7.5e-05	0.001834	up	coding	1347
235372_at	FCRLA	NM_001184866	Fc receptor-like A	9.28099	9.82135	-4.32721	-1.45433	7.5e-05	0.001836	down	coding	1348
215157_x_at	PABPC1	NM_002568	poly(A) binding protein, cytoplasmic 1	13.4163	13.6018	-4.15127	-1.13721	7.5e-05	0.001837	down	coding	1349
223475_at	CRISPLD1	NM_031461	cysteine-rich secretory protein LCCL domain containing 1	4.09984	3.94636	4.2959	1.11225	7.5e-05	0.001837	up	coding	1350
203276_at	LMNB1	NM_001198557	lamin B1	8.34644	7.69485	4.38922	1.5709	7.5e-05	0.001838	up	coding	1351
223939_at	SUCNR1	NM_033050	succinate receptor 1	6.28302	5.8285	4.21257	1.37032	7.6e-05	0.001842	up	coding	1352
40149_at	SH2B1	NM_001145795	SH2B adaptor protein 1	8.1346	8.37684	-4.26491	-1.18283	7.6e-05	0.001842	down	coding	1353
203888_at	THBD	NM_000361	thrombomodulin	8.05305	6.9919	4.24463	2.0866	7.6e-05	0.001843	up	coding	1354
225671_at	SPNS2	NM_001124758	spinster homolog 2 (Drosophila)	6.78134	6.58606	4.3057	1.14495	7.6e-05	0.001852	up	coding	1355
207121_s_at	MAPK6	NM_002748	mitogen-activated protein kinase 6	9.48619	8.91135	4.4059	1.48952	7.6e-05	0.001853	up	coding	1356
238439_at	ANKRD22	NM_144590	ankyrin repeat domain 22	6.82278	5.81973	4.24475	2.00423	7.7e-05	0.00186	up	coding	1357
207067_s_at	HDC	NM_002112	histidine decarboxylase	7.06173	7.59699	-4.60562	-1.4492	7.7e-05	0.00186	down	coding	1358
201174_s_at	TERF2IP	NM_018975	telomeric repeat binding factor 2, interacting protein	10.3293	10.0104	4.19321	1.24738	7.7e-05	0.001865	up	coding	1359
1562415_a_at	SPOCD1	NM_144569	SPOC domain containing 1	5.41335	5.21241	4.37639	1.14944	7.7e-05	0.00187	up	coding	1360
223126_s_at	C1orf21	NM_030806	chromosome 1 open reading frame 21	6.28602	6.65494	-4.56463	-1.29139	7.7e-05	0.001871	down	coding	1361
200923_at	LGALS3BP	NM_005567	lectin, galactoside-binding, soluble, 3 binding protein	9.01711	8.47845	4.2217	1.45263	7.7e-05	0.001872	up	coding	1362
241652_x_at	LIN7A	NM_004664	lin-7 homolog A (C. elegans)	3.54705	3.32819	4.12584	1.16382	7.7e-05	0.001874	up	coding	1363
1569768_at	---	---	---	3.49431	3.33129	4.1681	1.11963	7.8e-05	0.001874	up	coding	1364
213264_at	PCBP2	NM_001098620	poly(rC) binding protein 2	8.2769	8.53993	-4.23927	-1.19999	7.8e-05	0.001892	down	coding	1365
210598_at	---	---	---	7.24547	6.89246	4.15654	1.27722	7.8e-05	0.001893	up	coding	1366
1558826_at	ZNF831	NM_178457	zinc finger protein 831	5.96052	6.55325	-4.403	-1.5081	7.9e-05	0.001898	down	coding	1367
208914_at	GGA2	NM_015044	golgi-associated, gamma adaptin ear containing, ARF binding protein 2	8.51137	8.94219	-4.32409	-1.34799	7.9e-05	0.001898	down	coding	1368
220684_at	TBX21	NM_013351	T-box 21	8.46774	9.13004	-4.29871	-1.5826	7.9e-05	0.0019	down	coding	1369
213628_at	CLCC1	NM_001048210	chloride channel CLIC-like 1	6.39472	6.79765	-4.44155	-1.32219	7.9e-05	0.0019	down	coding	1370
204817_at	ESPL1	NM_012291	extra spindle pole bodies homolog 1 (S. cerevisiae)	6.97996	6.6854	4.37891	1.22652	7.9e-05	0.0019	up	coding	1371
203412_at	LZTR1	NM_006767	leucine-zipper-like transcription regulator 1	8.27959	8.49665	-4.35009	-1.16236	8e-05	0.001911	down	coding	1372
220646_s_at	KLRF1	NM_016523	killer cell lectin-like receptor subfamily F, member 1	9.4023	10.1594	-4.15898	-1.69005	8e-05	0.001912	down	coding	1373
227010_at	---	---	---	5.93884	5.73461	4.26953	1.15207	8e-05	0.001912	up	coding	1374
201406_at	RPL36A	NM_001199972	ribosomal protein L36a	13.3935	13.5793	-4.14761	-1.13751	8e-05	0.001912	down	coding	1375
227878_s_at	ALKBH7	NM_032306	alkB, alkylation repair homolog 7 (E. coli)	8.34665	8.63835	-4.34207	-1.22408	8e-05	0.001914	down	coding	1376
212219_at	PSME4	NM_014614	proteasome (prosome, macropain) activator subunit 4	9.37662	8.99415	4.28202	1.30357	8e-05	0.001915	up	coding	1377
44669_at	SDHAF1	NM_001042631	succinate dehydrogenase complex assembly factor 1	7.2933	7.68259	-4.43505	-1.30975	8e-05	0.001919	down	coding	1378
216913_s_at	RRP12	NM_001145114	ribosomal RNA processing 12 homolog (S. cerevisiae)	8.1059	7.75303	4.40776	1.2771	8e-05	0.00192	up	coding	1379
213927_at	MAP3K9	NM_033141	mitogen-activated protein kinase kinase kinase 9	5.44174	5.78583	-4.40125	-1.26936	8.1e-05	0.001925	down	coding	1380
206785_s_at	KLRC1	NM_002259	killer cell lectin-like receptor subfamily C, member 1	8.10918	8.90386	-4.19008	-1.73469	8.1e-05	0.001926	down	coding	1381
220966_x_at	ARPC5L	NM_030978	actin related protein 2/3 complex, subunit 5-like	10.0436	9.75687	4.36402	1.21984	8.1e-05	0.001943	up	coding	1382
37028_at	PPP1R15A	NM_014330	protein phosphatase 1, regulatory subunit 15A	9.76674	9.05095	4.34558	1.64237	8.2e-05	0.001946	up	coding	1383
220034_at	IRAK3	NM_001142523	interleukin-1 receptor-associated kinase 3	7.57338	6.97313	4.26362	1.51598	8.2e-05	0.001947	up	coding	1384
213090_s_at	MIR1257	NM_003185	microRNA 1257	7.90697	8.33385	-4.19857	-1.34432	8.2e-05	0.001947	down	coding	1385
213333_at	MDH2	NM_005918	malate dehydrogenase 2, NAD (mitochondrial)	7.38895	7.64973	-4.14675	-1.19813	8.2e-05	0.001947	down	coding	1386
214140_at	SLC25A16	NM_152707	solute carrier family 25 (mitochondrial carrier; Graves disease autoantigen), member 16	6.03314	5.856	4.21036	1.13064	8.2e-05	0.001953	up	coding	1387
207875_at	---	---	---	4.00781	3.87878	4.15818	1.09356	8.2e-05	0.001953	up	coding	1388
201990_s_at	CREBL2	NM_001310	cAMP responsive element binding protein-like 2	7.98461	8.55217	-4.25306	-1.48202	8.2e-05	0.001956	down	coding	1389
240806_at	RPL15	NM_001253379	ribosomal protein L15	7.12568	7.44646	-4.32326	-1.24901	8.2e-05	0.001957	down	coding	1390
207318_s_at	CDK13	NM_003718	cyclin-dependent kinase 13	8.42705	8.95097	-4.43077	-1.43786	8.3e-05	0.00196	down	coding	1391
203149_at	PVRL2	NM_001042724	poliovirus receptor-related 2 (herpesvirus entry mediator B)	7.1575	6.7115	4.44471	1.36226	8.3e-05	0.00196	up	coding	1392
227149_at	TNRC6C	NM_001142640	trinucleotide repeat containing 6C	6.36583	6.74747	-4.27738	-1.30283	8.3e-05	0.00196	down	coding	1393
237831_x_at	MMAA	NM_172250	methylmalonic aciduria (cobalamin deficiency) cblA type	3.47565	3.38744	4.15764	1.06305	8.3e-05	0.00196	up	coding	1394
225787_at	UBE2F	NM_001278305	ubiquitin-conjugating enzyme E2F (putative)	10.0132	9.72359	4.21399	1.22233	8.3e-05	0.001962	up	coding	1395
212587_s_at	PTPRC	NM_001267798	protein tyrosine phosphatase, receptor type, C	11.8757	12.4046	-4.30382	-1.44283	8.3e-05	0.001963	down	coding	1396
212268_at	SERPINB1	NM_030666	serpin peptidase inhibitor, clade B (ovalbumin), member 1	10.3192	9.80525	4.35663	1.42797	8.3e-05	0.001967	up	coding	1397
201202_at	PCNA	NM_002592	proliferating cell nuclear antigen	9.85365	9.26293	4.2511	1.50599	8.4e-05	0.00197	up	coding	1398
1555687_a_at	CLEC4C	NM_130441	C-type lectin domain family 4, member C	4.04472	4.44855	-4.7458	-1.32302	8.4e-05	0.00197	down	coding	1399
204438_at	MRC1	NM_001009567	mannose receptor, C type 1	4.70946	5.11859	-4.5952	-1.32788	8.4e-05	0.001971	down	coding	1400
210786_s_at	FLI1	NM_001167681	Friend leukemia virus integration 1	8.93756	9.42434	-4.18285	-1.40132	8.4e-05	0.001972	down	coding	1401
208949_s_at	LGALS3	NM_001177388	lectin, galactoside-binding, soluble, 3	11.395	10.9369	4.2672	1.37377	8.5e-05	0.001999	up	coding	1402
1552610_a_at	JAK1	NM_002227	Janus kinase 1	10.4156	10.7506	-4.12502	-1.26139	8.5e-05	0.002003	down	coding	1403
206034_at	SERPINB8	NM_001031848	serpin peptidase inhibitor, clade B (ovalbumin), member 8	7.53082	7.26121	4.11302	1.20548	8.6e-05	0.002021	up	coding	1404
222039_at	KIF18B	NM_001080443	kinesin family member 18B	6.54403	6.21023	4.18691	1.26033	8.6e-05	0.002026	up	coding	1405
227847_at	EPM2AIP1	NM_014805	EPM2A (laforin) interacting protein 1	7.79676	8.12195	-4.40996	-1.25283	8.6e-05	0.002026	down	coding	1406
214351_x_at	RPL13	NM_000977	ribosomal protein L13	13.3974	13.549	-4.15966	-1.11077	8.6e-05	0.002026	down	coding	1407
239235_at	---	---	---	5.85028	6.17105	-4.52546	-1.24899	8.7e-05	0.00203	down	coding	1408
201209_at	HDAC1	NM_004964	histone deacetylase 1	10.5923	10.878	-4.17594	-1.219	8.7e-05	0.002047	down	coding	1409
212073_at	CSNK2A1	NM_001895	casein kinase 2, alpha 1 polypeptide	7.87712	8.14177	-4.20719	-1.20134	8.8e-05	0.00205	down	coding	1410
223111_x_at	ARID4B	NM_001206794	AT rich interactive domain 4B (RBP1-like)	7.827	8.18073	-4.30451	-1.27786	8.8e-05	0.002059	down	coding	1411
227374_at	EARS2	NM_001083614	glutamyl-tRNA synthetase 2, mitochondrial	6.18769	6.5212	-4.37501	-1.26007	8.8e-05	0.002059	down	coding	1412
223318_s_at	ALKBH7	NM_032306	alkB, alkylation repair homolog 7 (E. coli)	8.85422	9.25235	-4.26906	-1.3178	8.8e-05	0.00206	down	coding	1413
213439_x_at	RUNDC3A	NM_001144825	RUN domain containing 3A	7.38601	7.1132	4.13366	1.20816	8.8e-05	0.00206	up	coding	1414
222703_s_at	YRDC	NM_024640	yrdC domain containing (E. coli)	7.69088	7.3444	4.31846	1.27146	8.9e-05	0.002067	up	coding	1415
205917_at	ZNF264	NM_003417	zinc finger protein 264	7.91575	8.51091	-4.52029	-1.51063	8.9e-05	0.002076	down	coding	1416
223993_s_at	CNIH4	NM_001277197	cornichon homolog 4 (Drosophila)	10.4117	9.96731	4.28053	1.36076	8.9e-05	0.002078	up	coding	1417
224919_at	MRPS6	NM_032476	mitochondrial ribosomal protein S6	9.08161	9.44111	-4.23826	-1.28298	9e-05	0.002091	down	coding	1418
229228_at	CREB5	NM_001011666	cAMP responsive element binding protein 5	7.62277	6.84302	4.22083	1.71683	9e-05	0.002097	up	coding	1419
211519_s_at	KIF2C	NM_006845	kinesin family member 2C	5.91356	5.58131	4.32795	1.25898	9e-05	0.0021	up	coding	1420
200739_s_at	SUMO3	NM_006936	small ubiquitin-like modifier 3	9.13503	8.78179	4.33402	1.27743	9.1e-05	0.002101	up	coding	1421
1554906_a_at	MPHOSPH6	NM_005792	M-phase phosphoprotein 6	5.54052	5.03608	4.1024	1.41857	9.1e-05	0.002107	up	coding	1422
202275_at	G6PD	NM_000402	glucose-6-phosphate dehydrogenase	8.91249	8.47499	4.33367	1.35425	9.1e-05	0.002107	up	coding	1423
209570_s_at	NSG1	NM_001040101	neuron specific gene family member 1	6.84083	7.25748	-4.4996	-1.33482	9.1e-05	0.002107	down	coding	1424
227863_at	IFITM10	NM_001170820	interferon induced transmembrane protein 10	5.85584	5.53026	4.15285	1.25316	9.1e-05	0.002107	up	coding	1425
213296_at	RER1	NM_007033	RER1 retention in endoplasmic reticulum 1 homolog (S. cerevisiae)	8.03847	8.30971	-4.26434	-1.20685	9.1e-05	0.002107	down	coding	1426
238668_at	---	---	---	9.83421	10.0532	-4.11856	-1.16394	9.1e-05	0.002107	down	coding	1427
230785_at	---	---	---	4.81257	4.63766	4.20313	1.12889	9.1e-05	0.002107	up	coding	1428
224453_s_at	ETNK1	NM_001039481	ethanolamine kinase 1	6.10155	5.56738	4.27694	1.44811	9.2e-05	0.00211	up	coding	1429
214251_s_at	NUMA1	NM_006185	nuclear mitotic apparatus protein 1	6.99425	7.51333	-4.2986	-1.43304	9.2e-05	0.00211	down	coding	1430
1554292_a_at	UHRF1BP1L	NM_001006947	UHRF1 binding protein 1-like	5.63127	5.21825	4.21325	1.33147	9.2e-05	0.00211	up	coding	1431
223839_s_at	---	---	---	5.28515	4.9814	4.28632	1.23435	9.2e-05	0.00211	up	coding	1432
207957_s_at	PRKCB	NM_002738	protein kinase C, beta	10.444	10.7164	-4.17641	-1.20781	9.2e-05	0.00211	down	coding	1433
1553626_a_at	EFCAB13	NM_001195192	EF-hand calcium binding domain 13	4.70643	4.93322	-4.2073	-1.17022	9.2e-05	0.00211	down	coding	1434
226514_at	ZNF71	NM_021216	zinc finger protein 71	6.96617	7.14836	-4.21166	-1.13461	9.2e-05	0.00211	down	coding	1435
209066_x_at	UQCRB	NM_001199975	ubiquinol-cytochrome c reductase binding protein	12.0059	12.2132	-4.15206	-1.15449	9.3e-05	0.002135	down	coding	1436
221900_at	COL8A2	NM_005202	collagen, type VIII, alpha 2	6.09412	5.76307	4.23964	1.25793	9.4e-05	0.00216	up	coding	1437
225519_at	PPP4R2	NM_174907	protein phosphatase 4, regulatory subunit 2	9.54292	9.15195	4.34556	1.31128	9.4e-05	0.002166	up	coding	1438
229743_at	ZNF438	NM_001143766	zinc finger protein 438	7.30234	7.08247	4.20439	1.16463	9.5e-05	0.002168	up	coding	1439
219493_at	SHCBP1	NM_024745	SHC SH2-domain binding protein 1	6.15751	5.46583	4.27863	1.61517	9.5e-05	0.002179	up	coding	1440
220577_at	GVINP1	NR_003945	GTPase, very large interferon inducible pseudogene 1	8.6811	9.33212	-4.38681	-1.57028	9.5e-05	0.00218	down	coding	1441
210517_s_at	AKAP12	NM_005100	A kinase (PRKA) anchor protein 12	5.21491	5.82476	-4.62052	-1.5261	9.5e-05	0.00218	down	coding	1442
209833_at	CRADD	NM_003805	CASP2 and RIPK1 domain containing adaptor with death domain	7.71148	7.47529	4.22062	1.17788	9.6e-05	0.002188	up	coding	1443
203003_at	MEF2D	NM_001271629	myocyte enhancer factor 2D	7.29608	6.9199	4.36629	1.2979	9.6e-05	0.002191	up	coding	1444
221479_s_at	BNIP3L	NM_004331	BCL2/adenovirus E1B 19kDa interacting protein 3-like	10.9659	10.5058	4.11662	1.37571	9.6e-05	0.002192	up	coding	1445
212288_at	FNBP1	NM_015033	formin binding protein 1	10.681	10.9783	-4.15475	-1.2288	9.6e-05	0.002192	down	coding	1446
1569770_x_at	---	---	---	3.89313	3.78635	4.1105	1.07683	9.6e-05	0.002196	up	coding	1447
224573_at	RNASEK	NM_001004333	ribonuclease, RNase K	11.6405	11.8364	-4.19754	-1.1454	9.6e-05	0.002198	down	coding	1448
229097_at	DIAPH3	NM_001042517	diaphanous homolog 3 (Drosophila)	6.17778	5.93365	4.2003	1.18437	9.7e-05	0.002207	up	coding	1449
200005_at	EIF3D	NM_003753	eukaryotic translation initiation factor 3, subunit D	10.9632	11.1976	-4.18012	-1.17645	9.7e-05	0.002211	down	coding	1450
217839_at	TFG	NM_001007565	TRK-fused gene	9.88531	9.67859	4.23603	1.15406	9.8e-05	0.00222	up	coding	1451
208029_s_at	LAPTM4B	NM_018407	lysosomal protein transmembrane 4 beta	6.80644	6.3754	4.10198	1.3482	9.8e-05	0.002236	up	coding	1452
223724_s_at	STAG3L1	NM_001002840	stromal antigen 3-like 1	7.02845	7.60958	-4.34626	-1.49602	9.9e-05	0.002237	down	coding	1453
202863_at	SP100	NM_001080391	SP100 nuclear antigen	10.1095	9.70432	4.36441	1.32422	9.9e-05	0.002242	up	coding	1454
203773_x_at	BLVRA	NM_000712	biliverdin reductase A	9.63694	9.12571	4.19925	1.42526	9.9e-05	0.002249	up	coding	1455
224791_at	ASAP1	NM_001247996	ArfGAP with SH3 domain, ankyrin repeat and PH domain 1	9.34773	8.98974	4.24715	1.28163	9.9e-05	0.002249	up	coding	1456
1555334_s_at	SLC30A5	NM_001251969	solute carrier family 30 (zinc transporter), member 5	6.83519	7.22622	-4.27004	-1.31133	9.9e-05	0.002252	down	coding	1457
1557119_a_at	ZNF575	NM_174945	zinc finger protein 575	7.05626	7.29756	-4.30484	-1.18206	0.0001	0.002252	down	coding	1458
210446_at	GATA1	NM_002049	GATA binding protein 1 (globin transcription factor 1)	6.82201	6.36878	4.31631	1.36911	0.0001	0.002255	up	coding	1459
219000_s_at	DSCC1	NM_024094	DNA replication and sister chromatid cohesion 1	5.55713	5.18047	4.27055	1.29833	0.0001	0.002256	up	coding	1460
241402_at	TSEN54	NM_207346	tRNA splicing endonuclease 54 homolog (S. cerevisiae)	7.19846	7.7397	-4.59927	-1.45523	0.0001	0.002257	down	coding	1461
1556597_a_at	LOC284513	---	uncharacterized LOC284513	5.87797	6.2139	-4.41851	-1.26219	0.0001	0.002258	down	coding	1462
215054_at	EPOR	NM_000121	erythropoietin receptor	7.37126	7.09485	4.23239	1.21118	0.0001	0.002265	up	coding	1463
205474_at	CRLF3	NM_015986	cytokine receptor-like factor 3	10.6752	11.0296	-4.20848	-1.27841	0.000101	0.00227	down	coding	1464
201490_s_at	PPIF	NM_005729	peptidylprolyl isomerase F	8.4728	7.75739	4.22604	1.64195	0.000101	0.002274	up	coding	1465
209060_x_at	NCOA3	NM_001174087	nuclear receptor coactivator 3	8.05956	8.69926	-4.28938	-1.558	0.000101	0.002274	down	coding	1466
213562_s_at	SQLE	NM_003129	squalene epoxidase	5.16259	4.8112	4.19602	1.27579	0.000101	0.002274	up	coding	1467
237304_at	SYCE2	NM_001105578	synaptonemal complex central element protein 2	5.30602	5.06557	4.25677	1.18136	0.000101	0.002274	up	coding	1468
219032_x_at	OPN3	NM_001030011	opsin 3	9.11351	9.4307	-4.12668	-1.2459	0.000101	0.002277	down	coding	1469
225435_at	SSR1	NM_003144	signal sequence receptor, alpha	8.26131	8.73507	-4.22368	-1.38872	0.000102	0.002279	down	coding	1470
244737_at	---	---	---	5.66964	6.08558	-4.31091	-1.33416	0.000102	0.002282	down	coding	1471
212239_at	PIK3R1	NM_001242466	phosphoinositide-3-kinase, regulatory subunit 1 (alpha)	8.62153	9.17676	-4.22366	-1.4694	0.000102	0.00229	down	coding	1472
217755_at	HN1	NM_001002032	hematological and neurological expressed 1	9.62125	9.32003	4.16172	1.23219	0.000103	0.002296	up	coding	1473
223700_at	MND1	NM_001253861	meiotic nuclear divisions 1 homolog (S. cerevisiae)	4.73084	4.28296	4.19292	1.36403	0.000103	0.0023	up	coding	1474
226980_at	DEPDC1B	NM_001145208	DEP domain containing 1B	4.1527	3.75708	4.15459	1.31551	0.000103	0.002305	up	coding	1475
220603_s_at	MCTP2	NM_001159643	multiple C2 domains, transmembrane 2	7.28614	6.84241	4.20159	1.36012	0.000103	0.002306	up	coding	1476
204962_s_at	CENPA	NM_001042426	centromere protein A	5.96331	5.52531	4.17127	1.35472	0.000103	0.002306	up	coding	1477
212136_at	ATP2B4	NM_001001396	ATPase, Ca++ transporting, plasma membrane 4	8.69619	9.09496	-4.25164	-1.31838	0.000103	0.002307	down	coding	1478
208717_at	OXA1L	NM_005015	oxidase (cytochrome c) assembly 1-like	10.4655	10.6635	-4.07924	-1.14708	0.000104	0.002318	down	coding	1479
207040_s_at	ST13	NM_003932	suppression of tumorigenicity 13 (colon carcinoma) (Hsp70 interacting protein)	10.79	11.0404	-4.05039	-1.18958	0.000105	0.002339	down	coding	1480
244471_x_at	PANX2	NM_001160300	pannexin 2	7.28875	7.09805	4.14666	1.14131	0.000105	0.002344	up	coding	1481
1566324_a_at	MAF	NM_001031804	v-maf musculoaponeurotic fibrosarcoma oncogene homolog (avian)	3.95536	4.38435	-4.63215	-1.34629	0.000105	0.002345	down	coding	1482
229010_at	CBL	NM_005188	Cbl proto-oncogene, E3 ubiquitin protein ligase	7.17559	7.96254	-4.40351	-1.72543	0.000106	0.002355	down	coding	1483
202284_s_at	CDKN1A	NM_000389	cyclin-dependent kinase inhibitor 1A (p21, Cip1)	10.0321	9.26278	4.37827	1.7045	0.000107	0.002355	up	coding	1484
210778_s_at	MIR4800	NM_006454	microRNA 4800	8.15805	8.7036	-4.48116	-1.45958	0.000106	0.002355	down	coding	1485
201020_at	YWHAH	NM_003405	tyrosine 3-monooxygenase/tryptophan 5-monooxygenase activation protein, eta polypeptide	9.05203	8.60237	4.27724	1.36571	0.000106	0.002355	up	coding	1486
237299_at	---	---	---	6.68989	6.26582	4.04741	1.34171	0.000107	0.002355	up	coding	1487
225923_at	VAPB	NM_001195677	VAMP (vesicle-associated membrane protein)-associated protein B and C	5.88318	6.30661	-4.28853	-1.34111	0.000106	0.002355	down	coding	1488
1562738_a_at	USP3-AS1	NR_034080	USP3 antisense RNA 1	4.66945	4.26653	4.06334	1.32219	0.000106	0.002355	up	coding	1489
232004_at	HNRNPR	NM_001102397	heterogeneous nuclear ribonucleoprotein R	6.49195	6.8424	-4.26884	-1.27496	0.000107	0.002355	down	coding	1490
218117_at	RBX1	NM_014248	ring-box 1, E3 ubiquitin protein ligase	10.6804	10.3731	4.13456	1.23737	0.000106	0.002355	up	coding	1491
208306_x_at	HLA-DRB1	NM_001243965	major histocompatibility complex, class II, DR beta 1	12.853	13.1282	-4.14008	-1.21021	0.000106	0.002355	down	coding	1492
210975_x_at	FASTK	NM_001258461	Fas-activated serine/threonine kinase	8.49913	8.62388	-4.14079	-1.09032	0.000107	0.002355	down	coding	1493
217418_x_at	MS4A1	NM_021950	membrane-spanning 4-domains, subfamily A, member 1	10.3781	11.1018	-4.25261	-1.65134	0.000107	0.002356	down	coding	1494
1560922_s_at	ZNF169	NM_194320	zinc finger protein 169	6.10482	6.53289	-4.51181	-1.34543	0.000107	0.002356	down	coding	1495
203887_s_at	THBD	NM_000361	thrombomodulin	8.22746	6.78022	4.19156	2.72686	0.000108	0.002381	up	coding	1496
218355_at	KIF4A	NM_012310	kinesin family member 4A	6.2293	5.81761	4.20086	1.33025	0.000108	0.002383	up	coding	1497
209828_s_at	IL16	NM_001172128	interleukin 16	7.57983	8.11826	-4.30471	-1.45239	0.000108	0.002384	down	coding	1498
231249_at	SZT2	NM_001012960	seizure threshold 2 homolog (mouse)	5.86377	5.51753	4.2262	1.27124	0.000108	0.002384	up	coding	1499
208645_s_at	RPS14	NM_001025070	ribosomal protein S14	13.8635	13.9761	-4.07088	-1.08121	0.000108	0.002384	down	coding	1500
203094_at	MAD2L1BP	NM_001003690	MAD2L1 binding protein	8.21814	7.86977	4.23902	1.27312	0.000109	0.002389	up	coding	1501
200031_s_at	RPS11	NM_001015	ribosomal protein S11	13.9839	14.0644	-4.11522	-1.05738	0.000109	0.002389	down	coding	1502
205848_at	GAS2	NM_001143830	growth arrest-specific 2	3.98981	3.80519	4.23977	1.13652	0.000109	0.002397	up	coding	1503
205034_at	CCNE2	NM_004702	cyclin E2	5.67586	5.21149	4.2183	1.37971	0.00011	0.0024	up	coding	1504
1558906_a_at	OSER1-AS1	NR_038337	OSER1 antisense RNA 1 (head to head)	5.98409	6.24848	-4.18451	-1.20113	0.000109	0.0024	down	coding	1505
206472_s_at	TLE3	NM_001105192	transducin-like enhancer of split 3 (E(sp1) homolog, Drosophila)	7.93516	7.39522	4.21212	1.45392	0.00011	0.002411	up	coding	1506
211508_s_at	GH2	NM_002059	growth hormone 2	3.98529	3.85789	4.16349	1.09232	0.00011	0.002411	up	coding	1507
213215_at	AP3S2	NM_001199058	adaptor-related protein complex 3, sigma 2 subunit	6.62552	6.82853	-4.2094	-1.1511	0.00011	0.002413	down	coding	1508
231708_at	C2CD3	NM_015531	C2 calcium-dependent domain containing 3	6.60203	6.28875	4.375	1.24253	0.00011	0.002414	up	coding	1509
228349_at	KIAA1958	NM_133465	KIAA1958	7.09388	6.85192	4.21814	1.1826	0.000111	0.002422	up	coding	1510
202871_at	TRAF4	NM_004295	TNF receptor-associated factor 4	7.56078	7.05416	4.2453	1.42072	0.000111	0.002426	up	coding	1511
202699_s_at	TMEM63A	NM_014698	transmembrane protein 63A	8.25616	8.5818	-4.13467	-1.25323	0.000112	0.002434	down	coding	1512
226116_at	DFFA	NM_004401	DNA fragmentation factor, 45kDa, alpha polypeptide	8.09009	8.4114	-4.17573	-1.24946	0.000112	0.002434	down	coding	1513
1554509_a_at	FAM188A	NM_024948	family with sequence similarity 188, member A	6.3873	6.17229	4.236	1.16071	0.000112	0.002438	up	coding	1514
204132_s_at	FOXO3	NM_001455	forkhead box O3	8.69195	8.19178	4.16686	1.41438	0.000112	0.002441	up	coding	1515
226426_at	ADNP	NM_015339	activity-dependent neuroprotector homeobox	8.12474	8.52489	-4.15118	-1.31964	0.000112	0.002441	down	coding	1516
239082_at	FZD3	NM_017412	frizzled family receptor 3	6.40866	6.89506	-4.41114	-1.40094	0.000112	0.002443	down	coding	1517
238630_at	OPA3	NM_001017989	optic atrophy 3 (autosomal recessive, with chorea and spastic paraplegia)	6.3509	6.02194	4.09325	1.2561	0.000113	0.002443	up	coding	1518
212957_s_at	LOC92249	NR_015353	uncharacterized LOC92249	6.76762	7.0611	-4.25212	-1.22559	0.000112	0.002443	down	coding	1519
230972_at	ANKRD9	NM_152326	ankyrin repeat domain 9	7.57834	6.68708	4.28695	1.8548	0.000113	0.002446	up	coding	1520
213320_at	PRMT3	NM_001145166	protein arginine methyltransferase 3	6.98927	6.57464	4.28459	1.33295	0.000113	0.002451	up	coding	1521
38892_at	GLTSCR1L	NM_015349	GLTSCR1-like	8.34185	8.73592	-4.2014	-1.31409	0.000114	0.002462	down	coding	1522
217728_at	S100A6	NM_014624	S100 calcium binding protein A6	12.1819	11.9175	4.10349	1.20108	0.000114	0.002465	up	coding	1523
219417_s_at	C17orf59	NM_017622	chromosome 17 open reading frame 59	7.59354	7.82877	-4.3241	-1.1771	0.000114	0.002473	down	coding	1524
218400_at	OAS3	NM_006187	2'-5'-oligoadenylate synthetase 3, 100kDa	10.0266	9.14914	4.20654	1.83719	0.000115	0.002477	up	coding	1525
204780_s_at	FAS	NM_000043	Fas cell surface death receptor	8.64519	7.87672	4.39738	1.70346	0.000115	0.002477	up	coding	1526
203277_at	DFFA	NM_004401	DNA fragmentation factor, 45kDa, alpha polypeptide	8.00109	8.34341	-4.38664	-1.26779	0.000116	0.002496	down	coding	1527
201871_s_at	UBXN1	NM_015853	UBX domain protein 1	9.84989	10.1109	-4.22197	-1.19833	0.000116	0.002498	down	coding	1528
200068_s_at	CANX	NM_001024649	calnexin	11.047	11.268	-4.15641	-1.16558	0.000116	0.002498	down	coding	1529
208937_s_at	ID1	NM_002165	inhibitor of DNA binding 1, dominant negative helix-loop-helix protein	7.71285	6.51783	4.24689	2.28949	0.000116	0.002506	up	coding	1530
212598_at	WDFY3	NM_014991	WD repeat and FYVE domain containing 3	6.31546	6.02793	4.08793	1.22055	0.000116	0.002506	up	coding	1531
211975_at	ARFGAP2	NM_001242832	ADP-ribosylation factor GTPase activating protein 2	8.98195	9.21838	-4.06754	-1.17808	0.000116	0.002506	down	coding	1532
214734_at	EXPH5	NM_001144763	exophilin 5	5.34779	5.70893	-4.3408	-1.28444	0.000117	0.002511	down	coding	1533
1555639_a_at	LOC101059993	NM_001198836	uncharacterized LOC101059993	5.6445	6.11769	-4.16258	-1.38817	0.000117	0.002516	down	coding	1534
223347_at	MUM1	NM_032853	melanoma associated antigen (mutated) 1	7.47584	7.74327	-4.26524	-1.20366	0.000117	0.002519	down	coding	1535
220703_at	IDI2-AS1	NM_018470	IDI2 antisense RNA 1	4.77917	4.52081	4.17011	1.19612	0.000117	0.002519	up	coding	1536
231049_at	LMO2	NM_001142315	LIM domain only 2 (rhombotin-like 1)	5.31884	5.08296	4.09245	1.17762	0.000117	0.002519	up	coding	1537
205098_at	CCR1	NM_001295	chemokine (C-C motif) receptor 1	9.90838	8.78107	4.33878	2.18451	0.000118	0.002528	up	coding	1538
222740_at	ATAD2	NM_014109	ATPase family, AAA domain containing 2	5.81883	5.15178	4.28835	1.58783	0.000118	0.002529	up	coding	1539
212478_at	RMND5A	NM_022780	required for meiotic nuclear division 5 homolog A (S. cerevisiae)	7.02782	6.64534	4.31738	1.30358	0.000118	0.002529	up	coding	1540
210074_at	CTSL2	NM_001201575	cathepsin L2	6.42149	6.10855	4.3755	1.24224	0.000118	0.002529	up	coding	1541
235917_at	INIP	---	NULL	6.05842	6.3391	-4.1912	-1.21477	0.000118	0.002529	down	coding	1542
213080_x_at	RPL5	NM_000969	ribosomal protein L5	13.3289	13.491	-4.03228	-1.11891	0.000118	0.002529	down	coding	1543
212237_at	ASXL1	NM_001164603	additional sex combs like 1 (Drosophila)	8.7755	9.02366	-4.08624	-1.18769	0.000119	0.002537	down	coding	1544
1561056_a_at	---	---	---	4.82298	4.68856	4.12201	1.09766	0.000119	0.002537	up	coding	1545
222633_at	TBL1XR1	NM_024665	transducin (beta)-like 1 X-linked receptor 1	8.39827	9.08938	-4.24662	-1.61452	0.000119	0.002542	down	coding	1546
227052_at	---	---	---	8.9603	9.4976	-4.09818	-1.45125	0.000119	0.002542	down	coding	1547
215449_at	TSPO2	NM_001010873	translocator protein 2	6.2986	5.93328	4.11889	1.28816	0.000119	0.002543	up	coding	1548
235051_at	CCDC50	NM_174908	coiled-coil domain containing 50	6.26272	6.89967	-4.32961	-1.55504	0.00012	0.002548	down	coding	1549
218085_at	CHMP5	NM_001195536	charged multivesicular body protein 5	8.99448	8.34003	4.25302	1.57402	0.00012	0.00256	up	coding	1550
240908_at	---	---	---	6.45358	7.07619	-4.40416	-1.53966	0.000121	0.00256	down	coding	1551
202042_at	HARS	NM_001258040	histidyl-tRNA synthetase	8.83867	9.10696	-4.10493	-1.20438	0.00012	0.00256	down	coding	1552
1555982_at	ZFYVE16	NM_001105251	zinc finger, FYVE domain containing 16	4.36657	4.20593	4.11852	1.11778	0.000121	0.00256	up	coding	1553
209417_s_at	IFI35	NM_005533	interferon-induced protein 35	9.76814	9.12359	4.20242	1.56325	0.000121	0.002565	up	coding	1554
207968_s_at	MEF2C	NM_001131005	myocyte enhancer factor 2C	7.02318	7.61667	-4.40456	-1.50889	0.000121	0.002567	down	coding	1555
227002_at	FAM78A	NM_033387	family with sequence similarity 78, member A	9.56961	9.94322	-4.18805	-1.29559	0.000121	0.002567	down	coding	1556
208416_s_at	SPTB	NM_000347	spectrin, beta, erythrocytic	6.857	6.544	4.22382	1.24229	0.000121	0.002567	up	coding	1557
204781_s_at	FAS	NM_000043	Fas cell surface death receptor	8.64994	8.03511	4.33641	1.53138	0.000122	0.002576	up	coding	1558
203026_at	ZBTB5	NM_014872	zinc finger and BTB domain containing 5	8.67342	8.37605	4.07708	1.2289	0.000122	0.002577	up	coding	1559
202990_at	PYGL	NM_001163940	phosphorylase, glycogen, liver	8.89997	8.31689	4.1094	1.49805	0.000122	0.002586	up	coding	1560
209831_x_at	DNASE2	NM_001375	deoxyribonuclease II, lysosomal	8.90043	8.69598	4.12364	1.15226	0.000122	0.002586	up	coding	1561
211704_s_at	SPIN2A	NM_001006681	spindlin family, member 2A	7.04784	7.30288	-4.04443	-1.19336	0.000124	0.002608	down	coding	1562
226761_at	IKZF4	NM_022465	IKAROS family zinc finger 4 (Eos)	6.49081	6.32024	4.19736	1.1255	0.000124	0.002621	up	coding	1563
227609_at	EPSTI1	NM_001002264	epithelial stromal interaction 1 (breast)	10.3819	9.51217	4.24674	1.82733	0.000125	0.002625	up	coding	1564
210356_x_at	MS4A1	NM_021950	membrane-spanning 4-domains, subfamily A, member 1	10.6783	11.4123	-4.20857	-1.66333	0.000125	0.002625	down	coding	1565
1555407_s_at	FGD3	NM_001083536	FYVE, RhoGEF and PH domain containing 3	7.40752	7.98197	-4.18811	-1.48911	0.000125	0.002625	down	coding	1566
213258_at	TFPI	NM_001032281	tissue factor pathway inhibitor (lipoprotein-associated coagulation inhibitor)	4.87876	4.4382	4.15695	1.35713	0.000125	0.002625	up	coding	1567
209832_s_at	CDT1	NM_030928	chromatin licensing and DNA replication factor 1	5.96253	5.63988	4.07938	1.25063	0.000125	0.002625	up	coding	1568
210527_x_at	TUBA3C	NM_006001	tubulin, alpha 3c	8.33054	8.12221	4.24724	1.15535	0.000125	0.002625	up	coding	1569
1563800_at	LOC283140	---	uncharacterized LOC283140	7.04484	6.8595	4.21316	1.13709	0.000125	0.002625	up	coding	1570
1553196_a_at	FCRL3	NM_001024667	Fc receptor-like 3	7.13291	7.87274	-4.3984	-1.66998	0.000125	0.002633	down	coding	1571
235553_at	GAPVD1	NM_015635	GTPase activating protein and VPS9 domains 1	7.41366	7.12279	4.24644	1.22337	0.000126	0.002637	up	coding	1572
228426_at	CLEC2D	NM_001004419	C-type lectin domain family 2, member D	6.39859	7.3171	-4.33484	-1.89017	0.000126	0.002647	down	coding	1573
1554624_a_at	LOC100653194	NM_001083910	signal-regulatory protein beta-1 isoform 3-like	8.09364	7.49589	4.16872	1.51336	0.000126	0.002647	up	coding	1574
218755_at	KIF20A	NM_005733	kinesin family member 20A	5.59011	5.24692	4.01382	1.26856	0.000126	0.002647	up	coding	1575
223553_s_at	DOK3	NM_001144875	docking protein 3	9.34787	8.89403	4.11548	1.36968	0.000127	0.002652	up	coding	1576
215519_x_at	SGSM3	NM_015705	small G protein signaling modulator 3	7.80201	8.04722	-4.06044	-1.18527	0.000127	0.002652	down	coding	1577
227219_x_at	MAP1LC3A	NM_032514	microtubule-associated protein 1 light chain 3 alpha	7.72323	7.48711	4.14064	1.17782	0.000127	0.002652	up	coding	1578
237032_x_at	SIPA1L1	NM_015556	signal-induced proliferation-associated 1 like 1	5.18478	5.01251	4.21024	1.12683	0.000127	0.002658	up	coding	1579
228907_at	---	---	---	6.6602	7.21076	-4.47381	-1.46466	0.000128	0.002662	down	coding	1580
208780_x_at	VAPA	NM_003574	VAMP (vesicle-associated membrane protein)-associated protein A, 33kDa	10.8687	10.6032	4.31544	1.20207	0.000128	0.002672	up	coding	1581
230302_at	OTTHUMG00000174444	---	NULL	5.48929	5.04211	4.11716	1.36338	0.000128	0.002676	up	coding	1582
235713_at	ALKBH8	NM_138775	alkB, alkylation repair homolog 8 (E. coli)	6.56551	6.99051	-4.28768	-1.34257	0.000129	0.002688	down	coding	1583
219814_at	MBNL3	NM_001170701	muscleblind-like splicing regulator 3	6.28529	5.84931	4.02148	1.35283	0.00013	0.002697	up	coding	1584
234968_at	DENND4C	NM_017925	DENN/MADD domain containing 4C	5.19451	4.89339	4.08274	1.23211	0.000131	0.002717	up	coding	1585
206600_s_at	SLC16A5	NM_001271765	solute carrier family 16, member 5 (monocarboxylic acid transporter 6)	7.23221	6.85479	4.11568	1.29902	0.000131	0.002723	up	coding	1586
203184_at	FBN2	NM_001999	fibrillin 2	6.63168	6.09629	4.08488	1.44933	0.000131	0.002729	up	coding	1587
208894_at	HLA-DRA	NM_019111	major histocompatibility complex, class II, DR alpha	12.793	13.1065	-4.0272	-1.24277	0.000131	0.002729	down	coding	1588
225999_at	RIMKLB	NM_020734	ribosomal modification protein rimK-like family member B	5.7292	5.50651	4.09641	1.16691	0.000131	0.002729	up	coding	1589
210439_at	ICOS	NM_012092	inducible T-cell co-stimulator	8.4476	7.9362	4.12883	1.42543	0.000132	0.002731	up	coding	1590
226806_s_at	NFIA	NM_001134673	nuclear factor I/A	4.71297	5.01107	-4.33849	-1.22953	0.000132	0.002731	down	coding	1591
236407_at	KCNE1	NM_000219	potassium voltage-gated channel, Isk-related family, member 1	4.42112	4.20821	4.0073	1.15902	0.000132	0.002738	up	coding	1592
207415_at	PLA2R1	NM_001007267	phospholipase A2 receptor 1, 180kDa	3.95418	3.85942	4.12228	1.06789	0.000132	0.002738	up	coding	1593
213226_at	CCNA2	NM_001237	cyclin A2	6.84651	6.22479	4.1754	1.53871	0.000133	0.002747	up	coding	1594
238988_at	---	---	---	7.90371	7.21257	4.24168	1.61456	0.000133	0.002749	up	coding	1595
224173_s_at	C2orf15	NM_016503	chromosome 2 open reading frame 15	5.81096	6.21153	-4.24737	-1.32003	0.000133	0.00275	down	coding	1596
239744_at	---	---	---	6.27516	6.76248	-4.2717	-1.40184	0.000134	0.002762	down	coding	1597
243813_at	LINC00968	NR_038236	long intergenic non-protein coding RNA 968	4.55155	4.27882	4.09431	1.2081	0.000134	0.002762	up	coding	1598
AFFX-HUMGAPDH/M33197_M_at	GAPDH	NM_001256799	glyceraldehyde-3-phosphate dehydrogenase	12.9142	12.6839	4.11537	1.17307	0.000134	0.002766	up	coding	1599
223310_x_at	PNPLA8	NM_001256007	patatin-like phospholipase domain containing 8	9.61661	9.21514	4.15993	1.32085	0.000134	0.002769	up	coding	1600
55616_at	PGAP3	NM_033419	post-GPI attachment to proteins 3	7.71485	7.96167	-4.26138	-1.18659	0.000134	0.002769	down	coding	1601
208915_s_at	GGA2	NM_015044	golgi-associated, gamma adaptin ear containing, ARF binding protein 2	8.55971	8.83953	-4.15835	-1.21405	0.000135	0.002782	down	coding	1602
204641_at	NEK2	NM_001204182	NIMA-related kinase 2	4.89604	4.44321	4.09401	1.36872	0.000135	0.002787	up	coding	1603
203968_s_at	CDC6	NM_001254	cell division cycle 6	5.00943	4.592	4.2123	1.33554	0.000136	0.002789	up	coding	1604
1563104_at	---	---	---	5.44327	5.70948	-4.17222	-1.20265	0.000136	0.002789	down	coding	1605
222118_at	CENPN	NM_001100624	centromere protein N	5.12213	4.88826	4.06305	1.17599	0.000136	0.002789	up	coding	1606
227807_at	PARP9	NM_001146102	poly (ADP-ribose) polymerase family, member 9	8.62299	8.09748	4.07737	1.43944	0.000137	0.002802	up	coding	1607
227221_at	ZMAT3	NM_022470	zinc finger, matrin-type 3	7.65479	7.97567	-4.21381	-1.24909	0.000137	0.002805	down	coding	1608
212112_s_at	STX12	NM_177424	syntaxin 12	9.31346	8.98937	4.15891	1.25188	0.000138	0.002831	up	coding	1609
207866_at	BMP8A	NM_181809	bone morphogenetic protein 8a	4.95661	4.82922	4.02313	1.09232	0.000138	0.002831	up	coding	1610
241453_at	PTK2	NM_001199649	protein tyrosine kinase 2	4.55309	4.30141	4.19222	1.1906	0.000139	0.00284	up	coding	1611
212022_s_at	MKI67	NM_001145966	antigen identified by monoclonal antibody Ki-67	7.2176	6.60938	4.22698	1.52438	0.000139	0.00285	up	coding	1612
201215_at	PLS3	NM_001136025	plastin 3	5.2212	4.72785	3.97063	1.40771	0.00014	0.002854	up	coding	1613
243887_at	MRPL30	NM_016503	mitochondrial ribosomal protein L30	4.60392	5.09113	-4.34618	-1.40173	0.00014	0.002855	down	coding	1614
220609_at	LOC202181	NR_026921	SUMO-interacting motifs containing 1 pseudogene	5.824	6.20369	-4.1684	-1.30107	0.00014	0.002855	down	coding	1615
201998_at	ST6GAL1	NM_003032	ST6 beta-galactosamide alpha-2,6-sialyltranferase 1	10.2924	10.6601	-4.1334	-1.29022	0.00014	0.002855	down	coding	1616
220272_at	BNC2	NM_017637	basonuclin 2	5.76485	5.99846	-4.11941	-1.17578	0.00014	0.002855	down	coding	1617
211105_s_at	NFATC1	NM_006162	nuclear factor of activated T-cells, cytoplasmic, calcineurin-dependent 1	8.79816	9.07434	-4.10499	-1.21098	0.00014	0.002857	down	coding	1618
1552257_a_at	TTLL12	NM_015140	tubulin tyrosine ligase-like family, member 12	7.75798	7.99987	-4.041	-1.18254	0.00014	0.002857	down	coding	1619
200082_s_at	RPS7	NM_001011	ribosomal protein S7	13.2007	13.4099	-4.01412	-1.15602	0.00014	0.002857	down	coding	1620
214971_s_at	ST6GAL1	NM_003032	ST6 beta-galactosamide alpha-2,6-sialyltranferase 1	6.75343	7.57346	-4.22572	-1.76544	0.000141	0.00286	down	coding	1621
214273_x_at	NPRL3	NM_001039476	nitrogen permease regulator-like 3 (S. cerevisiae)	8.12064	7.75375	3.97526	1.28957	0.000141	0.002863	up	coding	1622
226247_at	PLEKHA1	NM_001001974	pleckstrin homology domain containing, family A (phosphoinositide binding specific) member 1	9.05768	9.48192	-4.07148	-1.34187	0.000141	0.002871	down	coding	1623
213145_at	FBXL14	NM_152441	F-box and leucine-rich repeat protein 14	8.65616	9.04249	-4.11065	-1.30707	0.000142	0.002875	down	coding	1624
210541_s_at	TRIM27	NM_006510	tripartite motif containing 27	7.94429	8.42597	-4.17692	-1.39636	0.000142	0.002882	down	coding	1625
219615_s_at	KCNK5	NM_003740	potassium channel, subfamily K, member 5	5.5989	5.38439	4.12414	1.16031	0.000142	0.002883	up	coding	1626
1553604_at	ABCA13	NM_152701	ATP-binding cassette, sub-family A (ABC1), member 13	3.59233	3.24117	3.98462	1.27559	0.000142	0.002888	up	coding	1627
226790_at	MORN2	NM_001145450	MORN repeat containing 2	5.75328	5.49958	4.00125	1.19226	0.000143	0.002889	up	coding	1628
201285_at	MKRN1	NM_001145125	makorin ring finger protein 1	10.8106	10.4469	3.99813	1.28675	0.000143	0.002894	up	coding	1629
204636_at	COL17A1	NM_000494	collagen, type XVII, alpha 1	6.27426	5.98889	3.99216	1.21872	0.000143	0.002894	up	coding	1630
222670_s_at	MAFB	NM_005461	v-maf musculoaponeurotic fibrosarcoma oncogene homolog B (avian)	10.3564	9.57418	4.20576	1.71976	0.000143	0.002901	up	coding	1631
201458_s_at	BUB3	NM_001007793	BUB3 mitotic checkpoint protein	9.64416	9.98375	-4.05736	-1.2654	0.000144	0.002908	down	coding	1632
214129_at	LOC100996724	NM_001002810	myomegalin-like	6.24545	6.82525	-4.15456	-1.49465	0.000144	0.002914	down	coding	1633
236216_at	---	---	---	5.87088	5.57505	3.97986	1.22759	0.000144	0.002916	up	coding	1634
212560_at	SORL1	NM_003105	sortilin-related receptor, L(DLR class) A repeats containing	11.0845	11.3645	-4.172	-1.21414	0.000145	0.002925	down	coding	1635
216038_x_at	DAXX	NM_001141969	death-domain associated protein	8.37921	8.57589	-4.04936	-1.14606	0.000145	0.002931	down	coding	1636
208496_x_at	HIST1H3A	NM_003529	histone cluster 1, H3a	8.33927	7.93799	4.13779	1.32068	0.000146	0.002933	up	coding	1637
221620_s_at	APOO	NM_024122	apolipoprotein O	7.48208	7.22511	4.12855	1.19497	0.000146	0.002935	up	coding	1638
229036_at	TNRC6B	NM_001024843	trinucleotide repeat containing 6B	8.5328	9.0057	-4.12242	-1.3879	0.000146	0.002936	down	coding	1639
202582_s_at	RANBP9	NM_005493	RAN binding protein 9	10.1879	9.93436	4.0647	1.19211	0.000146	0.002936	up	coding	1640
210549_s_at	CCL23	NM_005064	chemokine (C-C motif) ligand 23	3.88939	3.75517	4.11115	1.0975	0.000146	0.002939	up	coding	1641
212976_at	LRRC8B	NM_001134476	leucine rich repeat containing 8 family, member B	4.69653	4.43945	4.08919	1.19506	0.000146	0.002941	up	coding	1642
217962_at	NOP10	NM_018648	NOP10 ribonucleoprotein	11.5444	11.1479	4.26662	1.31631	0.000147	0.002954	up	coding	1643
214567_s_at	XCL1	NM_002995	chemokine (C motif) ligand 1	7.97527	8.5775	-3.99537	-1.51806	0.000147	0.002956	down	coding	1644
235400_at	FCRLA	NM_001184866	Fc receptor-like A	7.25543	7.99622	-4.13456	-1.67109	0.000148	0.002969	down	coding	1645
208905_at	CYCS	NM_018947	cytochrome c, somatic	10.979	10.6755	4.06502	1.23412	0.000148	0.002969	up	coding	1646
210698_at	---	---	---	3.82265	3.71565	4.02725	1.07698	0.000149	0.00298	up	coding	1647
1555039_a_at	ABCC4	NM_001105515	ATP-binding cassette, sub-family C (CFTR/MRP), member 4	6.11461	5.73954	4.2111	1.2969	0.000149	0.002982	up	coding	1648
205698_s_at	MAP2K6	NM_002758	mitogen-activated protein kinase kinase 6	8.24093	7.9422	3.99734	1.23006	0.000149	0.002982	up	coding	1649
228617_at	XAF1	NM_017523	XIAP associated factor 1	11.09	10.3248	4.0869	1.69953	0.000149	0.002987	up	coding	1650
206491_s_at	NAPA	NM_003827	N-ethylmaleimide-sensitive factor attachment protein, alpha	9.81194	9.4246	4.14594	1.30798	0.00015	0.00299	up	coding	1651
230492_s_at	GPCPD1	NM_019593	glycerophosphocholine phosphodiesterase GDE1 homolog (S. cerevisiae)	8.61613	8.04207	4.26588	1.48871	0.00015	0.002998	up	coding	1652
212113_at	ATXN7L3B	NM_001136262	ataxin 7-like 3B	7.17076	7.62402	-4.23582	-1.36913	0.00015	0.003	down	coding	1653
236980_at	STRN	NM_003162	striatin, calmodulin binding protein	5.93541	6.1409	-4.10799	-1.15308	0.00015	0.003	down	coding	1654
241362_at	SOGA1	NM_080627	suppressor of glucose, autophagy associated 1	4.63809	4.48207	4.09966	1.11421	0.000151	0.003	up	coding	1655
1554503_a_at	OSCAR	NM_130771	osteoclast associated, immunoglobulin-like receptor	7.57649	7.0236	4.08311	1.46702	0.000151	0.003003	up	coding	1656
202302_s_at	RSRC2	NM_023012	arginine/serine-rich coiled-coil 2	10.6027	10.204	4.21108	1.31829	0.000151	0.003007	up	coding	1657
208219_at	ACVR1B	NM_004302	activin A receptor, type IB	6.22876	5.93327	4.02386	1.22731	0.000151	0.003007	up	coding	1658
214062_x_at	NFKBIB	NM_001001716	nuclear factor of kappa light polypeptide gene enhancer in B-cells inhibitor, beta	7.66756	7.44012	4.20074	1.17075	0.000152	0.003014	up	coding	1659
1554030_at	ARSB	NM_000046	arylsulfatase B	5.39986	5.22762	3.97838	1.12681	0.000152	0.003016	up	coding	1660
1553338_at	SDE2	NM_152608	SDE2 telomere maintenance homolog (S. pombe)	7.07899	6.44454	4.25689	1.55235	0.000152	0.003022	up	coding	1661
207233_s_at	MITF	NM_000248	microphthalmia-associated transcription factor	7.26912	6.85346	4.15914	1.33391	0.000153	0.003026	up	coding	1662
201988_s_at	CREBL2	NM_001310	cAMP responsive element binding protein-like 2	8.03486	8.40073	-4.09632	-1.28866	0.000153	0.003026	down	coding	1663
221264_s_at	TARDBP	NM_007375	TAR DNA binding protein	7.94067	8.57784	-4.13086	-1.55527	0.000153	0.003028	down	coding	1664
225444_at	UBN2	NM_173569	ubinuclein 2	6.75598	7.13848	-4.19205	-1.3036	0.000153	0.003028	down	coding	1665
211600_at	PTPRO	NM_002848	protein tyrosine phosphatase, receptor type, O	11.9925	12.3314	-4.03688	-1.26479	0.000153	0.003028	down	coding	1666
216925_s_at	TAL1	NM_003189	T-cell acute lymphocytic leukemia 1	7.44194	7.10325	3.97433	1.26461	0.000153	0.003028	up	coding	1667
244706_at	PCMTD1	NM_052937	protein-L-isoaspartate (D-aspartate) O-methyltransferase domain containing 1	5.3262	5.02028	4.14797	1.23621	0.000153	0.003028	up	coding	1668
231519_at	---	---	---	5.09	4.89077	4.07602	1.14809	0.000153	0.003028	up	coding	1669
211943_x_at	TPT1	NM_003295	tumor protein, translationally-controlled 1	14.0244	14.1024	-4.18339	-1.05554	0.000154	0.003033	down	coding	1670
239648_at	DCUN1D3	NM_173475	DCN1, defective in cullin neddylation 1, domain containing 3	5.94449	5.74617	4.07927	1.14736	0.000155	0.003052	up	coding	1671
1558348_at	---	---	---	5.92868	6.1712	-4.11569	-1.18306	0.000155	0.003054	down	coding	1672
204134_at	PDE2A	NM_001143839	phosphodiesterase 2A, cGMP-stimulated	6.79701	6.46041	4.17478	1.26278	0.000155	0.003057	up	coding	1673
210638_s_at	FBXO9	NM_012347	F-box protein 9	10.0273	9.7812	3.98563	1.18599	0.000155	0.00306	up	coding	1674
227625_s_at	STUB1	NM_005861	STIP1 homology and U-box containing protein 1, E3 ubiquitin protein ligase	10.7596	10.9719	-4.05918	-1.15855	0.000155	0.00306	down	coding	1675
223654_s_at	CELF4	NM_001025087	CUGBP, Elav-like family member 4	5.15598	4.96319	4.02417	1.14297	0.000156	0.00306	up	coding	1676
227696_at	EXOSC6	---	NULL	7.83165	8.20708	-4.11146	-1.29722	0.000156	0.003067	down	coding	1677
241447_at	ING5	NM_032329	inhibitor of growth family, member 5	7.23123	6.96992	4.06047	1.19856	0.000156	0.003067	up	coding	1678
225208_s_at	FAM103A1	NM_031452	family with sequence similarity 103, member A1	8.72731	8.5054	4.00269	1.16628	0.000156	0.003067	up	coding	1679
243671_at	---	---	---	3.78775	3.92517	-4.01568	-1.09994	0.000156	0.00307	down	coding	1680
1552928_s_at	TAB3	NM_152787	TGF-beta activated kinase 1/MAP3K7 binding protein 3	4.94207	4.46006	4.182	1.39669	0.000157	0.003073	up	coding	1681
206366_x_at	XCL1	NM_002995	chemokine (C motif) ligand 1	8.17596	8.76623	-3.97157	-1.50554	0.000158	0.003088	down	coding	1682
209694_at	PTS	NM_000317	6-pyruvoyltetrahydropterin synthase	8.49067	7.98466	4.11673	1.42012	0.000158	0.003088	up	coding	1683
239923_at	---	---	---	7.06563	6.64263	4.05521	1.34071	0.000157	0.003088	up	coding	1684
219304_s_at	PDGFD	NM_025208	platelet derived growth factor D	6.26959	6.97833	-4.21332	-1.63438	0.000158	0.003089	down	coding	1685
204958_at	PLK3	NM_004073	polo-like kinase 3	8.52742	8.01068	4.18462	1.43072	0.000158	0.003089	up	coding	1686
232309_at	LOC202181	NR_026921	SUMO-interacting motifs containing 1 pseudogene	6.86583	7.19668	-4.17928	-1.25776	0.000158	0.003089	down	coding	1687
1555590_a_at	GATA1	NM_002049	GATA binding protein 1 (globin transcription factor 1)	7.90413	7.5841	4.17218	1.24835	0.000158	0.003089	up	coding	1688
214183_s_at	TKTL1	NM_001145933	transketolase-like 1	7.35788	7.86608	-4.29302	-1.42227	0.000158	0.003092	down	coding	1689
238650_x_at	WDR89	NM_001008726	WD repeat domain 89	8.60798	8.74825	-4.10515	-1.10211	0.000159	0.003094	down	coding	1690
222974_at	IL22	NM_020525	interleukin 22	3.46678	3.35518	3.95316	1.08043	0.000159	0.003094	up	coding	1691
217995_at	SQRDL	NM_001271213	sulfide quinone reductase-like (yeast)	10.6756	10.2075	4.09799	1.38329	0.000159	0.003095	up	coding	1692
219094_at	ARMC8	NM_001267041	armadillo repeat containing 8	6.97536	6.46923	4.1589	1.42024	0.000159	0.003096	up	coding	1693
204175_at	ZNF593	NM_015871	zinc finger protein 593	8.15704	7.86787	4.05278	1.22194	0.000159	0.003099	up	coding	1694
210042_s_at	CTSZ	NM_001336	cathepsin Z	7.65476	8.60205	-4.34942	-1.92826	0.000159	0.0031	down	coding	1695
209148_at	RXRB	NM_001270401	retinoid X receptor, beta	8.41831	8.6094	-4.02187	-1.14162	0.00016	0.00312	down	coding	1696
223282_at	TSHZ1	NM_005786	teashirt zinc finger homeobox 1	7.88627	8.3686	-4.10234	-1.39699	0.000161	0.003129	down	coding	1697
210219_at	SP100	NM_001080391	SP100 nuclear antigen	5.50321	5.11875	4.13314	1.30537	0.000161	0.003131	up	coding	1698
1559754_at	LTB	NM_002341	lymphotoxin beta (TNF superfamily, member 3)	6.87713	7.16916	-4.18873	-1.22436	0.000161	0.003133	down	coding	1699
1569296_a_at	---	---	---	6.58814	6.79722	-4.09926	-1.15595	0.000162	0.003143	down	coding	1700
204141_at	TUBB2A	NM_001069	tubulin, beta 2A class IIa	8.76253	7.4682	4.21943	2.45263	0.000162	0.003145	up	coding	1701
202167_s_at	MMS19	NM_022362	MMS19 nucleotide excision repair homolog (S. cerevisiae)	8.43578	8.67986	-4.07198	-1.18433	0.000164	0.003175	down	coding	1702
203014_x_at	SGSM3	NM_015705	small G protein signaling modulator 3	8.13477	8.3328	-4.03594	-1.14713	0.000164	0.003179	down	coding	1703
233539_at	NAPEPLD	NM_001122838	N-acyl phosphatidylethanolamine phospholipase D	5.08337	5.48778	-4.12213	-1.32355	0.000165	0.003184	down	coding	1704
209588_at	EPHB2	NM_004442	EPH receptor B2	7.04462	6.68821	4.30832	1.28023	0.000165	0.003184	up	coding	1705
201590_x_at	ANXA2	NM_001002857	annexin A2	12.0178	11.6895	3.95808	1.25559	0.000165	0.003184	up	coding	1706
221823_at	C5orf30	NM_033211	chromosome 5 open reading frame 30	6.69994	6.39239	4.12605	1.2376	0.000165	0.003184	up	coding	1707
232144_at	---	---	---	3.96554	3.8205	4.06989	1.10576	0.000165	0.003184	up	coding	1708
219308_s_at	AK5	NM_012093	adenylate kinase 5	6.54267	7.0364	-4.1977	-1.40808	0.000165	0.003185	down	coding	1709
205390_s_at	ANK1	NM_000037	ankyrin 1, erythrocytic	6.15573	5.8126	3.98989	1.26851	0.000165	0.00319	up	coding	1710
214779_s_at	SGSM3	NM_015705	small G protein signaling modulator 3	8.15491	8.36907	-4.02052	-1.16003	0.000165	0.00319	down	coding	1711
202381_at	ADAM9	NM_001005845	ADAM metallopeptidase domain 9	8.07346	7.19543	4.22583	1.83787	0.000167	0.003198	up	coding	1712
219918_s_at	ASPM	NM_001206846	asp (abnormal spindle) homolog, microcephaly associated (Drosophila)	5.98733	5.30665	4.04729	1.60289	0.000166	0.003198	up	coding	1713
219258_at	TIPIN	NM_017858	TIMELESS interacting protein	6.31241	5.79571	4.11678	1.43068	0.000167	0.003198	up	coding	1714
205837_s_at	GYPA	NM_002099	glycophorin A (MNS blood group)	3.75073	3.2558	3.94046	1.40925	0.000166	0.003198	up	coding	1715
239988_at	---	---	---	7.44011	6.98073	4.11884	1.37495	0.000167	0.003198	up	coding	1716
232001_at	PRKCQ-AS1	NR_036502	PRKCQ antisense RNA 1	9.50423	9.95121	-4.09894	-1.36318	0.000166	0.003198	down	coding	1717
212501_at	CEBPB	NM_005194	CCAAT/enhancer binding protein (C/EBP), beta	12.6756	12.2675	4.06579	1.32692	0.000166	0.003198	up	coding	1718
202757_at	NELFB	NM_015456	negative elongation factor complex member B	8.64738	8.91799	-3.94895	-1.20632	0.000167	0.003201	down	coding	1719
241470_x_at	---	---	---	3.36846	3.24283	4.17394	1.09098	0.000167	0.003204	up	coding	1720
225309_at	PHF5A	NM_032758	PHD finger protein 5A	8.75849	8.44222	4.09334	1.2451	0.000167	0.003206	up	coding	1721
208792_s_at	CLU	NM_001831	clusterin	9.50133	8.67387	4.13488	1.77456	0.000168	0.003218	up	coding	1722
228648_at	LRG1	NM_052972	leucine-rich alpha-2-glycoprotein 1	7.39177	6.95664	3.94517	1.35203	0.000168	0.003218	up	coding	1723
214400_at	INSL3	NM_001265587	insulin-like 3 (Leydig cell)	5.98574	5.71073	4.07756	1.21001	0.000168	0.003218	up	coding	1724
219148_at	PBK	NM_018492	PDZ binding kinase	5.60133	4.93232	4.08105	1.58998	0.000169	0.00323	up	coding	1725
238488_at	IPO11	NM_001134779	importin 11	6.36708	5.97541	4.14295	1.31191	0.000169	0.003231	up	coding	1726
223669_at	HEMGN	NM_018437	hemogen	6.84465	5.9318	3.93472	1.88275	0.000169	0.003235	up	coding	1727
219383_at	PRR5L	NM_001160167	proline rich 5 like	6.13725	6.8228	-4.17928	-1.60831	0.00017	0.00324	down	coding	1728
1552619_a_at	ANLN	NM_018685	anillin, actin binding protein	4.54971	4.302	4.04092	1.18732	0.00017	0.00324	up	coding	1729
230158_at	DPY19L2	NM_173812	dpy-19-like 2 (C. elegans)	3.9069	3.71656	4.01338	1.14103	0.00017	0.00324	up	coding	1730
223019_at	FAM129B	NM_001035534	family with sequence similarity 129, member B	7.57403	7.22594	4.08216	1.27288	0.00017	0.003241	up	coding	1731
235572_at	SPC24	NM_182513	SPC24, NDC80 kinetochore complex component	5.51969	5.20196	4.10293	1.24637	0.00017	0.003241	up	coding	1732
220052_s_at	TINF2	NM_001099274	TERF1 (TRF1)-interacting nuclear factor 2	8.9064	9.12797	-3.97486	-1.166	0.000171	0.00325	down	coding	1733
242734_x_at	GALT	NM_000155	galactose-1-phosphate uridylyltransferase	5.70309	6.27191	-4.25592	-1.48331	0.000171	0.003252	down	coding	1734
239083_at	ZNF786	NM_152411	zinc finger protein 786	6.57241	7.00335	-4.14142	-1.34811	0.000171	0.003254	down	coding	1735
202092_s_at	ARL2BP	NM_012106	ADP-ribosylation factor-like 2 binding protein	9.04554	9.25121	-3.93955	-1.15322	0.000171	0.003254	down	coding	1736
1554415_at	TAF5L	NM_001025247	TAF5-like RNA polymerase II, p300/CBP-associated factor (PCAF)-associated factor, 65kDa	6.09126	5.71777	4.09341	1.29548	0.000172	0.00326	up	coding	1737
241840_at	---	---	---	5.62059	5.33565	4.1071	1.21837	0.000172	0.003264	up	coding	1738
219315_s_at	TMEM204	NM_001256541	transmembrane protein 204	8.4065	9.05575	-4.1329	-1.56835	0.000172	0.003268	down	coding	1739
223096_at	NOP58	NM_015934	NOP58 ribonucleoprotein	10.5292	10.1152	4.09602	1.33241	0.000173	0.003272	up	coding	1740
1569190_at	SCLT1	NM_144643	sodium channel and clathrin linker 1	4.97573	4.69419	4.05066	1.21549	0.000173	0.003272	up	coding	1741
227877_at	ANXA2R	NM_001014279	annexin A2 receptor	8.69922	9.11218	-4.18671	-1.33142	0.000173	0.003275	down	coding	1742
204882_at	ARHGAP25	NM_001007231	Rho GTPase activating protein 25	9.07493	9.46085	-4.15693	-1.30669	0.000173	0.003279	down	coding	1743
227844_at	FMNL3	NM_175736	formin-like 3	6.64183	7.01198	-4.13228	-1.29249	0.000174	0.003284	down	coding	1744
242218_at	LOC100507672	XR_108638	uncharacterized LOC100507672	7.01881	6.45719	4.16552	1.47593	0.000174	0.003297	up	coding	1745
213193_x_at	TRBC1	---	T cell receptor beta constant 1	12.4571	12.7461	-3.94606	-1.2218	0.000175	0.003304	down	coding	1746
224428_s_at	CDCA7	NM_031942	cell division cycle associated 7	8.57973	7.86227	4.16007	1.64428	0.000176	0.003313	up	coding	1747
201463_s_at	TALDO1	NM_006755	transaldolase 1	11.7202	11.3013	4.09558	1.33695	0.000176	0.003313	up	coding	1748
1558115_at	RECK	NM_021111	reversion-inducing-cysteine-rich protein with kazal motifs	6.0594	5.81166	3.98737	1.18735	0.000176	0.003313	up	coding	1749
227410_at	FAM43A	NM_153690	family with sequence similarity 43, member A	7.84513	8.3433	-4.10376	-1.41242	0.000176	0.003314	down	coding	1750
213469_at	PGAP1	NM_024989	post-GPI attachment to proteins 1	4.52791	4.15988	3.99193	1.29059	0.000176	0.003314	up	coding	1751
229756_at	LOC100996537	XR_158757	uncharacterized LOC100996537	6.75638	6.22117	4.273	1.44916	0.000177	0.003331	up	coding	1752
211275_s_at	GYG1	NM_001184720	glycogenin 1	10.2398	9.77708	4.03935	1.3781	0.000177	0.003331	up	coding	1753
213641_at	ZNF500	NM_021646	zinc finger protein 500	6.65154	6.96132	-4.1959	-1.23952	0.000177	0.003335	down	coding	1754
240027_at	LIN7A	NM_004664	lin-7 homolog A (C. elegans)	3.61696	3.43601	3.9024	1.13363	0.000178	0.003339	up	coding	1755
217741_s_at	ZFAND5	NM_001102420	zinc finger, AN1-type domain 5	11.133	10.6355	4.27458	1.41171	0.000178	0.003348	up	coding	1756
208912_s_at	CNP	NM_033133	2',3'-cyclic nucleotide 3' phosphodiesterase	9.11413	8.7898	4.03425	1.25208	0.000179	0.003356	up	coding	1757
215966_x_at	GK3P	NR_026575	glycerol kinase 3 pseudogene	6.14529	5.76907	3.92164	1.29794	0.000179	0.00336	up	coding	1758
212581_x_at	GAPDH	NM_001256799	glyceraldehyde-3-phosphate dehydrogenase	13.2798	13.0893	4.08261	1.14118	0.00018	0.00337	up	coding	1759
214540_at	HIST1H2BO	NM_003527	histone cluster 1, H2bo	5.02835	4.58192	4.02215	1.36266	0.000181	0.003388	up	coding	1760
202934_at	HK2	NM_000189	hexokinase 2	8.322	7.84209	4.11052	1.39465	0.000181	0.00339	up	coding	1761
213191_at	TICAM1	NM_014261	toll-like receptor adaptor molecule 1	7.36125	6.97568	4.18408	1.30638	0.000181	0.00339	up	coding	1762
226613_at	GATSL3	NM_001037666	GATS protein-like 3	6.61243	6.89368	-4.26251	-1.21524	0.000181	0.00339	down	coding	1763
219157_at	KLHL2	NM_001161521	kelch-like family member 2	8.4064	7.91852	4.22048	1.40238	0.000181	0.003392	up	coding	1764
1552667_a_at	SH2D3C	NM_001142531	SH2 domain containing 3C	7.8742	8.28813	-4.02592	-1.33231	0.000182	0.003394	down	coding	1765
207677_s_at	NCF4	NM_000631	neutrophil cytosolic factor 4, 40kDa	9.40047	8.95699	3.97563	1.35988	0.000183	0.003423	up	coding	1766
213446_s_at	IQGAP1	NM_003870	IQ motif containing GTPase activating protein 1	8.13254	8.88307	-4.05614	-1.68241	0.000184	0.003427	down	coding	1767
201096_s_at	ARF4	NM_001660	ADP-ribosylation factor 4	9.29134	8.88266	4.08199	1.32747	0.000184	0.003427	up	coding	1768
219546_at	BMP2K	NM_017593	BMP2 inducible kinase	7.79471	7.30612	3.98162	1.40307	0.000185	0.003452	up	coding	1769
220341_s_at	C5orf45	NM_001017987	chromosome 5 open reading frame 45	7.60524	7.89382	-4.17206	-1.22143	0.000185	0.003452	down	coding	1770
209098_s_at	JAG1	NM_000214	jagged 1	4.33417	4.12872	3.9181	1.15304	0.000185	0.003452	up	coding	1771
208881_x_at	IDI1	NM_004508	isopentenyl-diphosphate delta isomerase 1	10.1569	9.62206	4.20012	1.4488	0.000186	0.003457	up	coding	1772
208296_x_at	TNFAIP8	NM_001077654	tumor necrosis factor, alpha-induced protein 8	10.6651	11.0431	-3.96917	-1.29956	0.000186	0.003457	down	coding	1773
226884_at	LRRN1	NM_020873	leucine rich repeat neuronal 1	3.52922	3.36515	3.90722	1.12045	0.000186	0.003457	up	coding	1774
218413_s_at	ZNF639	NM_016331	zinc finger protein 639	6.53001	6.32895	4.02486	1.14954	0.000186	0.003459	up	coding	1775
237054_at	ENPP5	NM_021572	ectonucleotide pyrophosphatase/phosphodiesterase 5 (putative)	3.97485	4.23567	-4.21876	-1.19816	0.000187	0.003466	down	coding	1776
228359_at	UBASH3B	NM_032873	ubiquitin associated and SH3 domain containing B	6.66917	6.388	3.97975	1.21518	0.000189	0.003506	up	coding	1777
227366_at	RILP	NM_031430	Rab interacting lysosomal protein	8.54557	8.2427	4.03493	1.2336	0.000189	0.003508	up	coding	1778
222424_s_at	NUCKS1	NM_022731	nuclear casein kinase and cyclin-dependent kinase substrate 1	8.22647	7.93746	4.04993	1.22181	0.000189	0.003509	up	coding	1779
228979_at	SFTA3	NM_001101341	surfactant associated 3	3.61262	3.51335	3.94411	1.07123	0.000189	0.003509	up	coding	1780
1564155_x_at	---	---	---	9.26098	9.60417	-4.15392	-1.26856	0.00019	0.003515	down	coding	1781
239825_at	---	---	---	4.31546	4.09885	3.95138	1.162	0.000191	0.003527	up	coding	1782
209172_s_at	CENPF	NM_016343	centromere protein F, 350/400kDa	4.02839	3.86721	4.04155	1.1182	0.000191	0.003527	up	coding	1783
228986_at	OSBPL8	NM_001003712	oxysterol binding protein-like 8	7.38302	7.94465	-4.06695	-1.47594	0.000191	0.00353	down	coding	1784
215210_s_at	DLST	NM_001244883	dihydrolipoamide S-succinyltransferase (E2 component of 2-oxo-glutarate complex)	8.75418	8.50836	3.96152	1.18576	0.000191	0.00353	up	coding	1785
225321_s_at	PILRB	NM_013440	paired immunoglobin-like type 2 receptor beta	9.86855	10.2462	-4.11175	-1.29922	0.000191	0.003533	down	coding	1786
1569133_x_at	ARSK	NM_198150	arylsulfatase family, member K	4.95215	5.13219	-4.0705	-1.13291	0.000191	0.003534	down	coding	1787
223394_at	SERTAD1	NM_013376	SERTA domain containing 1	8.27854	7.92329	3.96179	1.27921	0.000192	0.00355	up	coding	1788
227080_at	ZNF697	NM_001080470	zinc finger protein 697	6.93399	6.3819	4.01416	1.46621	0.000193	0.003552	up	coding	1789
215332_s_at	CD8B	NM_001178100	CD8b molecule	7.68035	8.1588	-3.94472	-1.39324	0.000194	0.00357	down	coding	1790
204045_at	TCEAL1	NM_001006639	transcription elongation factor A (SII)-like 1	7.1026	7.49784	-4.10451	-1.31516	0.000194	0.00357	down	coding	1791
212578_x_at	RPS17	NM_001021	ribosomal protein S17	13.7069	13.8235	-3.9388	-1.08422	0.000194	0.00357	down	coding	1792
212607_at	AKT3	NM_001206729	v-akt murine thymoma viral oncogene homolog 3 (protein kinase B, gamma)	7.01148	7.46855	-4.20343	-1.37275	0.000195	0.003579	down	coding	1793
210951_x_at	RAB27A	NM_004580	RAB27A, member RAS oncogene family	9.86412	9.41756	4.03122	1.36279	0.000195	0.003581	up	coding	1794
212114_at	ATXN7L3B	NM_001136262	ataxin 7-like 3B	9.9315	10.1177	-3.931	-1.13775	0.000195	0.003586	down	coding	1795
221210_s_at	NPL	NM_001200050	N-acetylneuraminate pyruvate lyase (dihydrodipicolinate synthase)	8.0321	7.31322	4.0587	1.64591	0.000195	0.003589	up	coding	1796
213541_s_at	ERG	NM_001136154	v-ets erythroblastosis virus E26 oncogene homolog (avian)	4.72127	4.49205	3.87176	1.17221	0.000196	0.003591	up	coding	1797
213453_x_at	GAPDH	NM_001256799	glyceraldehyde-3-phosphate dehydrogenase	12.9797	12.7664	4.05894	1.15932	0.000196	0.003592	up	coding	1798
202217_at	C21orf33	NM_004649	chromosome 21 open reading frame 33	9.58613	9.79115	-3.93513	-1.1527	0.000196	0.003592	down	coding	1799
241156_at	---	---	---	4.70847	4.51719	3.96897	1.14177	0.000196	0.003594	up	coding	1800
204366_s_at	GTF3C2	NM_001035521	general transcription factor IIIC, polypeptide 2, beta 110kDa	9.09803	9.31072	-4.0153	-1.15885	0.000196	0.003595	down	coding	1801
219099_at	C12orf5	NM_020375	chromosome 12 open reading frame 5	8.47751	8.00929	4.04896	1.38341	0.000197	0.003597	up	coding	1802
227967_at	TUBGCP5	NM_001102610	tubulin, gamma complex associated protein 5	6.20043	5.9977	3.94078	1.15088	0.000197	0.003597	up	coding	1803
205139_s_at	UST	NM_005715	uronyl-2-sulfotransferase	4.93546	5.30339	-4.08136	-1.2905	0.000198	0.003616	down	coding	1804
208880_s_at	PRPF6	NM_012469	pre-mRNA processing factor 6	9.02501	9.27788	-4.01709	-1.19158	0.000198	0.003616	down	coding	1805
1554989_at	AREL1	NM_001039479	apoptosis resistant E3 ubiquitin protein ligase 1	6.33185	6.08747	4.08707	1.18458	0.000198	0.003624	up	coding	1806
215262_at	---	---	---	7.93827	8.47176	-3.9679	-1.44743	0.000199	0.003633	down	coding	1807
225701_at	AKNA	NM_030767	AT-hook transcription factor	10.3846	10.617	-3.90227	-1.17477	0.0002	0.003645	down	coding	1808
218773_s_at	MSRB2	NM_012228	methionine sulfoxide reductase B2	8.67311	8.22678	4.07301	1.36257	0.0002	0.003655	up	coding	1809
206515_at	CYP4F3	NM_000896	cytochrome P450, family 4, subfamily F, polypeptide 3	5.35956	4.68269	3.8624	1.59867	0.000201	0.003661	up	coding	1810
1554594_at	ARHGAP27	NM_001159330	Rho GTPase activating protein 27	5.82417	5.36948	3.99511	1.37049	0.000201	0.003663	up	coding	1811
224688_at	TMEM248	NM_017994	transmembrane protein 248	8.78463	9.11655	-3.95297	-1.25869	0.000202	0.00367	down	coding	1812
213208_at	GLTSCR1L	NM_015349	GLTSCR1-like	8.22662	8.54964	-3.99392	-1.25095	0.000202	0.00367	down	coding	1813
216710_x_at	ZNF287	NM_020653	zinc finger protein 287	5.6775	5.55189	4.06589	1.09097	0.000202	0.003671	up	coding	1814
208840_s_at	G3BP2	NM_012297	GTPase activating protein (SH3 domain) binding protein 2	9.48589	9.0814	4.03196	1.32362	0.000202	0.003673	up	coding	1815
209799_at	PRKAA1	NM_006251	protein kinase, AMP-activated, alpha 1 catalytic subunit	7.3516	6.94173	4.1238	1.32856	0.000203	0.003684	up	coding	1816
202083_s_at	SEC14L1	NM_001039573	SEC14-like 1 (S. cerevisiae)	8.10124	7.34709	4.18334	1.68664	0.000203	0.003686	up	coding	1817
210075_at	2018-03-02	NM_001005415	membrane-associated ring finger (C3HC4) 2, E3 ubiquitin protein ligase	8.55519	8.03332	4.09523	1.43581	0.000203	0.003686	up	coding	1818
201912_s_at	GSPT1	NM_001130006	G1 to S phase transition 1	9.62176	9.1513	3.93194	1.38555	0.000203	0.003687	up	coding	1819
212808_at	NFATC2IP	NM_032815	nuclear factor of activated T-cells, cytoplasmic, calcineurin-dependent 2 interacting protein	7.48279	7.94927	-4.00208	-1.38173	0.000203	0.003687	down	coding	1820
223177_at	NT5DC1	NM_152729	5'-nucleotidase domain containing 1	7.58255	7.91437	-3.92201	-1.25859	0.000204	0.003694	down	coding	1821
225056_at	SIPA1L2	NM_020808	signal-induced proliferation-associated 1 like 2	6.15733	5.54197	3.99365	1.53194	0.000204	0.003698	up	coding	1822
1558011_at	LOC100506903	NR_073404	putative POM121-like protein 1-like	5.51298	5.11377	3.94247	1.31879	0.000204	0.003698	up	coding	1823
225628_s_at	MLLT6	NM_005937	myeloid/lymphoid or mixed-lineage leukemia (trithorax homolog, Drosophila); translocated to, 6	8.50877	8.80095	-3.98692	-1.22449	0.000205	0.003714	down	coding	1824
207795_s_at	KLRD1	NM_001114396	killer cell lectin-like receptor subfamily D, member 1	8.61286	9.35619	-3.95339	-1.67403	0.000206	0.003716	down	coding	1825
1560921_at	ZNF169	NM_194320	zinc finger protein 169	6.84264	7.14708	-4.16826	-1.23494	0.000207	0.003734	down	coding	1826
229830_at	---	---	---	6.46911	5.83402	3.98464	1.55303	0.000207	0.003743	up	coding	1827
200952_s_at	CCND2	NM_001759	cyclin D2	6.80945	7.38835	-4.12399	-1.49371	0.000207	0.003743	down	coding	1828
231983_at	IBA57	NM_001010867	IBA57, iron-sulfur cluster assembly homolog (S. cerevisiae)	6.22502	5.9431	3.99768	1.21581	0.000208	0.003745	up	coding	1829
210651_s_at	EPHB2	NM_004442	EPH receptor B2	7.64329	7.29427	4.17821	1.2737	0.000208	0.003757	up	coding	1830
1558028_x_at	LINC00657	NR_027451	long intergenic non-protein coding RNA 657	7.26474	7.97093	-4.06278	-1.63149	0.000209	0.003758	down	coding	1831
233269_at	---	---	---	4.60267	4.37119	4.05061	1.17405	0.000209	0.003758	up	coding	1832
209774_x_at	CXCL2	NM_002089	chemokine (C-X-C motif) ligand 2	6.16912	5.07792	3.93763	2.1305	0.00021	0.003771	up	coding	1833
228795_at	PRKCB	NM_002738	protein kinase C, beta	8.14416	8.55008	-4.14525	-1.32493	0.00021	0.003771	down	coding	1834
240446_at	---	---	---	6.07162	6.42304	-3.93067	-1.27581	0.00021	0.003771	down	coding	1835
223378_at	GLIS2	NM_032575	GLIS family zinc finger 2	4.96063	4.7643	4.02616	1.14578	0.00021	0.003771	up	coding	1836
204661_at	CD52	NM_001803	CD52 molecule	13.0665	13.2231	-3.85397	-1.11462	0.00021	0.003771	down	coding	1837
205986_at	AATK	NM_001080395	apoptosis-associated tyrosine kinase	7.76176	7.49028	4.03758	1.20704	0.00021	0.003777	up	coding	1838
220945_x_at	MANSC1	NM_018050	MANSC domain containing 1	5.0924	4.59392	3.84865	1.41273	0.000211	0.003781	up	coding	1839
210646_x_at	RPL13A	NM_001270491	ribosomal protein L13a	14.1893	14.2948	-4.04471	-1.07582	0.000211	0.003786	down	coding	1840
204857_at	MAD1L1	NM_001013836	MAD1 mitotic arrest deficient-like 1 (yeast)	9.06869	9.49567	-4.05495	-1.34442	0.000212	0.003795	down	coding	1841
222998_at	MAF1	NM_032272	MAF1 homolog (S. cerevisiae)	9.39718	9.60639	-3.86086	-1.15605	0.000212	0.003801	down	coding	1842
225879_at	TSEN54	NM_207346	tRNA splicing endonuclease 54 homolog (S. cerevisiae)	9.37682	9.66673	-4.05223	-1.22257	0.000213	0.003805	down	coding	1843
203404_at	ARMCX2	NM_014782	armadillo repeat containing, X-linked 2	6.1934	6.50878	-3.94167	-1.24434	0.000213	0.003816	down	coding	1844
225733_at	B3GALT6	NM_080605	UDP-Gal:betaGal beta 1,3-galactosyltransferase polypeptide 6	7.73303	7.92138	-3.8475	-1.13946	0.000214	0.003817	down	coding	1845
208112_x_at	EHD1	NM_006795	EH-domain containing 1	9.12354	9.29903	-4.04796	-1.12935	0.000214	0.003819	down	coding	1846
1552644_a_at	PHC3	NM_024947	polyhomeotic homolog 3 (Drosophila)	7.10484	6.70963	3.98488	1.31514	0.000214	0.003821	up	coding	1847
243796_at	---	---	---	7.60876	8.27817	-4.29024	-1.59041	0.000215	0.003835	down	coding	1848
223581_at	ZNF577	NM_001135590	zinc finger protein 577	6.26057	6.65556	-4.29112	-1.31494	0.000215	0.003835	down	coding	1849
206296_x_at	MAP4K1	NM_001042600	mitogen-activated protein kinase kinase kinase kinase 1	8.75915	9.07868	-3.90587	-1.24792	0.000215	0.003836	down	coding	1850
230748_at	SLC16A6	NM_001174166	solute carrier family 16, member 6 (monocarboxylic acid transporter 7)	9.07326	8.08845	4.05457	1.97905	0.000216	0.00384	up	coding	1851
208652_at	PPP2CA	NM_002715	protein phosphatase 2, catalytic subunit, alpha isozyme	10.4318	10.1434	4.02367	1.22127	0.000216	0.00384	up	coding	1852
201257_x_at	RPS3A	NM_001006	ribosomal protein S3A	14.0305	14.1184	-3.9055	-1.0628	0.000216	0.00384	down	coding	1853
202067_s_at	LDLR	NM_000527	low density lipoprotein receptor	7.05138	6.65709	4.02044	1.3143	0.000216	0.003851	up	coding	1854
241721_at	---	---	---	6.71511	7.34553	-4.10331	-1.54801	0.000217	0.003865	down	coding	1855
201060_x_at	STOM	NM_001270526	stomatin	9.80732	9.28013	3.96665	1.44111	0.000218	0.003865	up	coding	1856
200917_s_at	SRPR	NM_001177842	signal recognition particle receptor (docking protein)	7.8424	8.28407	-3.99568	-1.35818	0.000218	0.003865	down	coding	1857
1562745_at	OTTHUMG00000175710	---	NULL	7.09895	6.83138	4.09148	1.20378	0.000218	0.003866	up	coding	1858
1564430_at	---	---	---	5.24604	4.90223	3.91376	1.2691	0.000218	0.003869	up	coding	1859
34187_at	RBMS2	NM_002898	RNA binding motif, single stranded interacting protein 2	5.79129	5.60127	4.1134	1.14078	0.000219	0.003885	up	coding	1860
222483_at	EFHD2	NM_024329	EF-hand domain family, member D2	9.13416	8.72134	4.05715	1.33129	0.00022	0.003892	up	coding	1861
210427_x_at	ANXA2	NM_001002857	annexin A2	12.0462	11.7277	3.86848	1.24705	0.00022	0.003892	up	coding	1862
237878_at	---	---	---	6.92089	7.16948	-3.95491	-1.18804	0.00022	0.003901	down	coding	1863
203528_at	SEMA4D	NM_001142287	sema domain, immunoglobulin domain (Ig), transmembrane domain (TM) and short cytoplasmic domain, (semaphorin) 4D	9.52786	9.79141	-3.95864	-1.20043	0.000221	0.003902	down	coding	1864
241495_at	CCNL1	NM_020307	cyclin L1	6.50673	5.99206	3.95314	1.42867	0.000221	0.00391	up	coding	1865
200783_s_at	STMN1	NM_001145454	stathmin 1	8.43739	7.99258	4.02053	1.36114	0.000222	0.003923	up	coding	1866
221703_at	BRIP1	NM_032043	BRCA1 interacting protein C-terminal helicase 1	3.78551	3.62104	3.99389	1.12075	0.000222	0.003923	up	coding	1867
201483_s_at	SUPT4H1	NM_003168	suppressor of Ty 4 homolog 1 (S. cerevisiae)	9.7252	9.42261	3.98429	1.23336	0.000223	0.003941	up	coding	1868
235571_at	---	---	---	4.99261	4.79431	4.0356	1.14735	0.000223	0.003942	up	coding	1869
240005_at	LARP4B	NM_015155	La ribonucleoprotein domain family, member 4B	5.72337	5.40881	4.15664	1.24363	0.000224	0.003944	up	coding	1870
204026_s_at	ZWINT	NM_001005413	ZW10 interacting kinetochore protein	8.19267	7.45834	4.10291	1.66363	0.000225	0.003959	up	coding	1871
208407_s_at	CTNND1	NM_001085458	catenin (cadherin-associated protein), delta 1	6.67474	7.10747	-3.88684	-1.34979	0.000225	0.003966	down	coding	1872
218272_at	TTC38	NM_017931	tetratricopeptide repeat domain 38	8.65243	9.07974	-4.1036	-1.34473	0.000225	0.003966	down	coding	1873
224624_at	LRRC8A	NM_001127244	leucine rich repeat containing 8 family, member A	9.81716	9.57081	4.13708	1.1862	0.000225	0.003966	up	coding	1874
215668_s_at	PLXNB1	NM_001130082	plexin B1	6.86799	6.63031	3.95195	1.17909	0.000225	0.003966	up	coding	1875
235464_at	CTB-89H12.4	---	NULL	3.98855	3.81705	4.02775	1.12623	0.000226	0.003968	up	coding	1876
212109_at	HN1L	NM_144570	hematological and neurological expressed 1-like	7.31242	7.60438	-4.09993	-1.2243	0.000226	0.003974	down	coding	1877
216442_x_at	FN1	NM_002026	fibronectin 1	5.71466	5.51035	3.96292	1.15214	0.000226	0.003974	up	coding	1878
204991_s_at	NF2	NM_000268	neurofibromin 2 (merlin)	6.54795	6.32833	3.99801	1.16443	0.000226	0.003975	up	coding	1879
220286_at	MTMR10	NM_017762	myotubularin related protein 10	5.73358	5.50637	3.93811	1.17057	0.000227	0.003977	up	coding	1880
244786_at	SNHG10	NR_001459	small nucleolar RNA host gene 10 (non-protein coding)	5.57972	6.04938	-4.04787	-1.38478	0.000227	0.00398	down	coding	1881
AFFX-M27830_5_at	---	---	---	9.80582	9.08948	4.07294	1.64301	0.000227	0.003986	up	coding	1882
204304_s_at	PROM1	NM_001145847	prominin 1	4.21374	3.84298	3.93257	1.29303	0.000228	0.003986	up	coding	1883
239499_at	DNAH2	NM_020877	dynein, axonemal, heavy chain 2	5.96059	5.66176	3.98242	1.23015	0.000228	0.003986	up	coding	1884
237866_at	PID1	NM_001100818	phosphotyrosine interaction domain containing 1	3.78658	3.66268	3.96932	1.08968	0.000228	0.003986	up	coding	1885
205339_at	STIL	NM_001048166	SCL/TAL1 interrupting locus	6.18898	5.92543	3.89333	1.20043	0.000229	0.004	up	coding	1886
228495_at	GPATCH11	NM_001278505	G patch domain containing 11	6.72702	7.28777	-3.97144	-1.47504	0.000229	0.004001	down	coding	1887
221258_s_at	KIF18A	NM_031217	kinesin family member 18A	4.40458	4.12656	3.92881	1.21253	0.000229	0.004002	up	coding	1888
218262_at	RMND5B	NM_022762	required for meiotic nuclear division 5 homolog B (S. cerevisiae)	7.69482	7.86836	-3.90001	-1.12782	0.000229	0.004006	down	coding	1889
214651_s_at	HOXA10-HOXA9	NM_152739	HOXA10-HOXA9 readthrough	4.55353	4.23945	3.87656	1.24322	0.00023	0.004007	up	coding	1890
206649_s_at	TFE3	NM_006521	transcription factor binding to IGHM enhancer 3	7.80218	7.5296	3.90886	1.20796	0.00023	0.004007	up	coding	1891
200652_at	SSR2	NM_003145	signal sequence receptor, beta (translocon-associated protein beta)	10.8127	11.0582	-3.99345	-1.18551	0.00023	0.00401	down	coding	1892
216570_x_at	OTTHUMG00000009792	---	NULL	11.5418	11.7626	-3.89264	-1.16532	0.000231	0.004019	down	coding	1893
219805_at	CXorf56	NM_001170569	chromosome X open reading frame 56	6.10067	5.84455	4.01561	1.19426	0.000231	0.004029	up	coding	1894
218525_s_at	HIF1AN	NM_017902	hypoxia inducible factor 1, alpha subunit inhibitor	7.19465	7.41077	-4.0141	-1.16161	0.000232	0.004031	down	coding	1895
213532_at	ADAM17	NM_003183	ADAM metallopeptidase domain 17	9.03233	8.7674	4.00161	1.20158	0.000233	0.004046	up	coding	1896
212319_at	SGSM2	NM_001098509	small G protein signaling modulator 2	7.65129	7.82778	-3.87236	-1.13013	0.000234	0.004061	down	coding	1897
218444_at	ALG12	NM_024105	ALG12, alpha-1,6-mannosyltransferase	7.36712	7.56124	-4.0125	-1.14403	0.000234	0.004062	down	coding	1898
207132_x_at	PFDN5	NM_002624	prefoldin subunit 5	12.157	12.3392	-3.88687	-1.13459	0.000234	0.004062	down	coding	1899
222833_at	LPCAT2	NM_017839	lysophosphatidylcholine acyltransferase 2	6.24981	5.86089	3.87246	1.30941	0.000234	0.004063	up	coding	1900
1569898_a_at	LOC100132707	NR_024476	uncharacterized LOC100132707	6.34143	6.63492	-4.07328	-1.22561	0.000234	0.004063	down	coding	1901
223384_s_at	TRIM4	NM_033017	tripartite motif containing 4	8.09318	8.61786	-4.01781	-1.43862	0.000235	0.00408	down	coding	1902
219627_at	ZNF767	NM_024910	zinc finger family member 767	7.05129	7.39456	-4.00089	-1.26863	0.000236	0.00409	down	coding	1903
204908_s_at	BCL3	NM_005178	B-cell CLL/lymphoma 3	8.82325	8.13592	4.01361	1.6103	0.000237	0.0041	up	coding	1904
201756_at	RPA2	NM_002946	replication protein A2, 32kDa	8.97627	9.31797	-3.90263	-1.26724	0.000237	0.0041	down	coding	1905
225466_at	PATL1	NM_152716	protein associated with topoisomerase II homolog 1 (yeast)	9.33083	9.03187	4.06481	1.23025	0.000237	0.004106	up	coding	1906
227986_at	ZNF343	NM_024325	zinc finger protein 343	6.31531	6.52829	-3.95339	-1.15908	0.000238	0.004122	down	coding	1907
209773_s_at	RRM2	NM_001034	ribonucleotide reductase M2	9.32899	8.27913	4.10531	2.07032	0.000239	0.004129	up	coding	1908
225119_at	CHMP4B	NM_176812	charged multivesicular body protein 4B	8.67002	8.13795	3.91612	1.446	0.000239	0.004129	up	coding	1909
90610_at	LRCH4	NM_002319	leucine-rich repeats and calponin homology (CH) domain containing 4	10.0965	10.3125	-4.07942	-1.16151	0.000239	0.004129	down	coding	1910
233706_at	---	---	---	5.98911	6.4156	-4.03184	-1.34396	0.000239	0.004133	down	coding	1911
217575_s_at	---	---	---	4.03802	3.73857	3.81717	1.23067	0.00024	0.00414	up	coding	1912
216227_at	---	---	---	4.83526	4.6194	3.97018	1.1614	0.000241	0.004151	up	coding	1913
237082_at	---	---	---	6.89717	6.51805	3.87142	1.30055	0.000241	0.00416	up	coding	1914
205568_at	AQP9	NM_020980	aquaporin 9	9.15859	8.29978	4.00676	1.81354	0.000242	0.004162	up	coding	1915
240413_at	PYHIN1	NM_152501	pyrin and HIN domain family, member 1	8.75565	9.36478	-3.85935	-1.52534	0.000242	0.00417	down	coding	1916
203044_at	CHSY1	NM_014918	chondroitin sulfate synthase 1	9.53567	9.0441	3.99843	1.40597	0.000243	0.004179	up	coding	1917
203744_at	HMGB3	NM_005342	high mobility group box 3	6.85669	6.56385	4.05116	1.22506	0.000243	0.004179	up	coding	1918
243707_at	---	---	---	5.75809	6.04213	-4.19879	-1.2176	0.000243	0.00418	down	coding	1919
207895_at	NAALADL1	NM_005468	N-acetylated alpha-linked acidic dipeptidase-like 1	6.26334	6.53552	-3.98535	-1.20764	0.000244	0.004182	down	coding	1920
237001_at	---	---	---	3.91157	3.64686	3.86504	1.20139	0.000244	0.004182	up	coding	1921
202168_at	TAF9	NM_001015891	TAF9 RNA polymerase II, TATA box binding protein (TBP)-associated factor, 32kDa	10.0343	9.75792	3.86312	1.21119	0.000245	0.004198	up	coding	1922
208076_at	HIST1H4A	NM_001034077	histone cluster 1, H4a	4.78477	4.5283	4.00718	1.19455	0.000245	0.004198	up	coding	1923
203658_at	SLC25A20	NM_000387	solute carrier family 25 (carnitine/acylcarnitine translocase), member 20	8.43821	8.7697	-3.8951	-1.25831	0.000246	0.00421	down	coding	1924
223145_s_at	AKIRIN2	NM_018064	akirin 2	9.42562	9.08532	4.00181	1.26602	0.000246	0.004215	up	coding	1925
241842_x_at	C19orf45	NM_198534	chromosome 19 open reading frame 45	6.57094	6.30416	4.00683	1.20312	0.000246	0.004215	up	coding	1926
217194_at	OTTHUMG00000035019	---	NULL	3.24283	3.16041	3.94223	1.05879	0.000246	0.004215	up	coding	1927
201785_at	RNASE1	NM_002933	ribonuclease, RNase A family, 1 (pancreatic)	7.10108	6.76578	4.0237	1.26164	0.000247	0.004219	up	coding	1928
244261_at	IFNLR1	NM_170743	interferon, lambda receptor 1	6.87092	7.3754	-4.03838	-1.41861	0.000247	0.004226	down	coding	1929
214554_at	HIST1H2AG	NM_003509	histone cluster 1, H2ag	4.28627	4.05281	3.94728	1.17565	0.000247	0.004226	up	coding	1930
219863_at	HERC5	NM_016323	HECT and RLD domain containing E3 ubiquitin protein ligase 5	8.80483	7.83997	3.98057	1.95187	0.000248	0.004231	up	coding	1931
211990_at	HLA-DPA1	NM_001242524	major histocompatibility complex, class II, DP alpha 1	12.8375	13.1721	-3.8541	-1.26105	0.000248	0.004231	down	coding	1932
206150_at	CD27	NM_001242	CD27 molecule	10.3096	10.7172	-3.86639	-1.32646	0.000248	0.004233	down	coding	1933
216226_at	TAF4B	NM_005640	TAF4b RNA polymerase II, TATA box binding protein (TBP)-associated factor, 105kDa	6.33655	6.05539	3.92095	1.21517	0.000248	0.004234	up	coding	1934
209376_x_at	SCAF11	NM_004719	SR-related CTD-associated factor 11	8.9739	9.50264	-4.10771	-1.44267	0.000249	0.004236	down	coding	1935
1553133_at	C9orf72	NM_001256054	chromosome 9 open reading frame 72	9.62483	8.81688	4.10388	1.75072	0.000249	0.004244	up	coding	1936
208805_at	KIAA0391	NM_001256678	KIAA0391	11.8149	11.4587	3.99676	1.28011	0.000249	0.004244	up	coding	1937
1555167_s_at	NAMPT	NM_005746	nicotinamide phosphoribosyltransferase	9.03576	8.12479	3.96971	1.88031	0.00025	0.00425	up	coding	1938
1554614_a_at	PTBP2	NM_021190	polypyrimidine tract binding protein 2	5.48838	5.12849	3.87066	1.28333	0.00025	0.00425	up	coding	1939
204139_x_at	MZF1	NM_001267033	myeloid zinc finger 1	8.13949	8.31655	-3.80879	-1.13058	0.00025	0.004252	down	coding	1940
212124_at	ZMIZ1	NM_020338	zinc finger, MIZ-type containing 1	9.98996	9.67095	3.90489	1.24748	0.000251	0.004258	up	coding	1941
217769_s_at	POMP	NM_015932	proteasome maturation protein	11.2642	10.9744	3.99775	1.22245	0.000251	0.004258	up	coding	1942
218017_s_at	HGSNAT	NM_152419	heparan-alpha-glucosaminide N-acetyltransferase	8.31157	8.5487	-3.87976	-1.17864	0.000251	0.004258	down	coding	1943
208352_x_at	ANK1	NM_000037	ankyrin 1, erythrocytic	6.73513	6.41866	3.85298	1.24527	0.000251	0.004264	up	coding	1944
217473_x_at	SLC11A1	NM_000578	solute carrier family 11 (proton-coupled divalent metal ion transporters), member 1	7.97342	7.61893	3.93446	1.27853	0.000252	0.004267	up	coding	1945
225884_s_at	GZF1	NM_022482	GDNF-inducible zinc finger protein 1	8.72371	7.88749	4.06439	1.78536	0.000252	0.004268	up	coding	1946
206937_at	SPTA1	NM_003126	spectrin, alpha, erythrocytic 1 (elliptocytosis 2)	5.00055	4.74364	3.82011	1.19492	0.000252	0.004271	up	coding	1947
227824_at	PRKCB	NM_002738	protein kinase C, beta	6.89352	7.36001	-4.03964	-1.38175	0.000253	0.00428	down	coding	1948
224836_at	TP53INP2	NM_021202	tumor protein p53 inducible nuclear protein 2	7.95625	7.40831	4.00101	1.46199	0.000255	0.004305	up	coding	1949
217957_at	C16orf80	NM_013242	chromosome 16 open reading frame 80	9.44495	8.98316	4.00529	1.37725	0.000254	0.004305	up	coding	1950
220160_s_at	KPTN	NM_007059	kaptin (actin binding protein)	7.07892	6.81485	4.00335	1.20087	0.000255	0.004309	up	coding	1951
205624_at	CPA3	NM_001870	carboxypeptidase A3 (mast cell)	6.67456	7.38243	-4.12242	-1.63339	0.000257	0.004334	down	coding	1952
244043_at	TFDP2	NM_001178138	transcription factor Dp-2 (E2F dimerization partner 2)	6.70958	7.24646	-4.13462	-1.45083	0.000257	0.004342	down	coding	1953
209182_s_at	C10orf10	NM_007021	chromosome 10 open reading frame 10	6.66555	6.41675	4.04668	1.18822	0.000257	0.004344	up	coding	1954
213341_at	FEM1C	NM_020177	fem-1 homolog c (C. elegans)	6.53939	6.05252	4.00071	1.4014	0.000258	0.004345	up	coding	1955
1558766_at	---	---	---	5.17683	5.59942	-4.13309	-1.34033	0.000258	0.004345	down	coding	1956
207168_s_at	H2AFY	NM_001040158	H2A histone family, member Y	11.9088	11.7004	3.9662	1.15541	0.000258	0.00435	up	coding	1957
219753_at	STAG3	NM_012447	stromal antigen 3	7.27635	6.90629	4.16853	1.2924	0.000259	0.004366	up	coding	1958
209625_at	PIGH	NM_004569	phosphatidylinositol glycan anchor biosynthesis, class H	7.06134	6.80544	3.91693	1.19408	0.00026	0.004374	up	coding	1959
225420_at	GPAM	NM_001244949	glycerol-3-phosphate acyltransferase, mitochondrial	5.45197	6.02123	-3.98994	-1.48376	0.00026	0.004375	down	coding	1960
205657_at	HAAO	NM_012205	3-hydroxyanthranilate 3,4-dioxygenase	7.09581	6.86396	3.96552	1.17434	0.00026	0.00438	up	coding	1961
222468_at	KIAA0319L	NM_024874	KIAA0319-like	8.47443	8.24476	3.90655	1.17257	0.000261	0.004382	up	coding	1962
203994_s_at	C21orf2	NM_001271440	chromosome 21 open reading frame 2	7.43989	7.619	-3.91574	-1.13218	0.000261	0.004382	down	coding	1963
209345_s_at	PI4K2A	NM_018425	phosphatidylinositol 4-kinase type 2 alpha	8.35202	7.96439	3.90294	1.30825	0.000261	0.00439	up	coding	1964
215016_x_at	DST	NM_001144769	dystonin	5.69915	5.97379	-4.07237	-1.20969	0.000262	0.004393	down	coding	1965
235276_at	EPSTI1	NM_001002264	epithelial stromal interaction 1 (breast)	9.66203	8.85624	4.03426	1.74811	0.000264	0.00442	up	coding	1966
202014_at	PPP1R15A	NM_014330	protein phosphatase 1, regulatory subunit 15A	9.31619	8.66437	3.96325	1.57115	0.000264	0.00442	up	coding	1967
230805_at	MIR142	NR_029683	microRNA 142	8.66788	9.19629	-4.04049	-1.44234	0.000264	0.00442	down	coding	1968
230179_at	LOC285812	---	uncharacterized LOC285812	7.37781	7.79557	-3.9506	-1.33585	0.000264	0.00442	down	coding	1969
231060_at	---	---	---	4.25946	4.08266	3.88815	1.13037	0.000264	0.00442	up	coding	1970
211743_s_at	PRG2	NM_001243245	proteoglycan 2, bone marrow (natural killer cell activator, eosinophil granule major basic protein)	5.92331	5.59511	3.83307	1.25545	0.000264	0.004421	up	coding	1971
239823_at	AC005682.5	---	NULL	5.75409	5.34004	3.90754	1.33241	0.000265	0.004434	up	coding	1972
205311_at	DDC	NM_000790	dopa decarboxylase (aromatic L-amino acid decarboxylase)	5.72799	5.53158	3.93151	1.14584	0.000265	0.004434	up	coding	1973
215047_at	TRIM58	NM_015431	tripartite motif containing 58	8.71747	7.67986	3.96065	2.05282	0.000268	0.004453	up	coding	1974
202314_at	CYP51A1	NM_000786	cytochrome P450, family 51, subfamily A, polypeptide 1	7.10288	6.51035	3.98625	1.50789	0.000267	0.004453	up	coding	1975
203755_at	BUB1B	NM_001211	BUB1 mitotic checkpoint serine/threonine kinase B	6.31056	5.72383	3.95764	1.50184	0.000267	0.004453	up	coding	1976
204363_at	F3	NM_001178096	coagulation factor III (thromboplastin, tissue factor)	5.98473	5.52966	3.86329	1.37085	0.000267	0.004453	up	coding	1977
201702_s_at	PPP1R10	NM_002714	protein phosphatase 1, regulatory subunit 10	7.35638	7.75185	-4.12519	-1.31537	0.000267	0.004453	down	coding	1978
228135_at	C1orf52	NM_198077	chromosome 1 open reading frame 52	9.32899	8.94769	3.98847	1.30251	0.000267	0.004453	up	coding	1979
235181_at	TYW5	NM_001039693	tRNA-yW synthesizing protein 5	7.46615	7.11603	4.07195	1.27466	0.000267	0.004453	up	coding	1980
232517_s_at	HELZ2	NM_001037335	helicase with zinc finger 2, transcriptional coactivator	7.6722	7.34892	3.8015	1.25117	0.000267	0.004453	up	coding	1981
216125_s_at	RANBP9	NM_005493	RAN binding protein 9	7.74261	7.44437	3.93841	1.22965	0.000268	0.004453	up	coding	1982
238420_at	TAOK1	NM_020791	TAO kinase 1	6.44515	6.77428	-3.90604	-1.25626	0.000268	0.004455	down	coding	1983
203857_s_at	PDIA5	NM_006810	protein disulfide isomerase family A, member 5	7.66571	7.37795	3.95554	1.22074	0.000269	0.004472	up	coding	1984
204178_s_at	LOC101059993	NM_001198836	uncharacterized LOC101059993	8.51321	8.83392	-3.91266	-1.24895	0.000269	0.004474	down	coding	1985
1564620_at	---	---	---	5.41777	5.22934	3.90272	1.13952	0.000269	0.004474	up	coding	1986
217683_at	HBE1	NM_005330	hemoglobin, epsilon 1	5.85204	5.48904	3.79389	1.2861	0.00027	0.004481	up	coding	1987
208754_s_at	NAP1L1	NM_004537	nucleosome assembly protein 1-like 1	10.1387	10.5439	-3.91439	-1.32428	0.00027	0.004482	down	coding	1988
208663_s_at	TTC3	NM_001001894	tetratricopeptide repeat domain 3	8.44507	9.08054	-3.96147	-1.55344	0.000271	0.004494	down	coding	1989
203662_s_at	TMOD1	NM_001166116	tropomodulin 1	7.12266	6.65154	3.77685	1.38619	0.000271	0.004494	up	coding	1990
215886_x_at	USP12	NM_182488	ubiquitin specific peptidase 12	5.45634	5.15975	3.89925	1.22824	0.000272	0.004499	up	coding	1991
237085_x_at	OTTHUMG00000013266	---	NULL	7.62765	7.46126	3.99575	1.12225	0.000272	0.004499	up	coding	1992
1554196_at	IZUMO1	NM_182575	izumo sperm-egg fusion 1	4.18616	3.99992	3.87242	1.13779	0.000272	0.004508	up	coding	1993
205690_s_at	BUD31	NM_003910	BUD31 homolog (S. cerevisiae)	9.88465	9.54761	4.01752	1.26317	0.000273	0.00451	up	coding	1994
218941_at	FBXW2	NM_012164	F-box and WD repeat domain containing 2	7.86696	7.61163	3.94369	1.19361	0.000273	0.00451	up	coding	1995
210579_s_at	TRIM10	NM_006778	tripartite motif containing 10	6.19201	6.05797	3.80008	1.09736	0.000273	0.00451	up	coding	1996
202973_x_at	FAM13A	NM_001015045	family with sequence similarity 13, member A	8.52032	7.79333	4.06965	1.65519	0.000273	0.004512	up	coding	1997
203536_s_at	CIAO1	NM_004804	cytosolic iron-sulfur protein assembly 1	7.95906	8.16784	-3.94019	-1.15571	0.000273	0.004512	down	coding	1998
212497_at	MAPK1IP1L	NM_144578	mitogen-activated protein kinase 1 interacting protein 1-like	7.39558	7.04595	3.83882	1.27423	0.000274	0.004514	up	coding	1999
[truncated: 1 more rows]

## Sheet: GSE17732
Probe Set ID	Gene Symbol	Accession Number	Gene Description	Mean Signal of Group pharyngitis	Mean Signal of Group control	d Score	Fold Change	p-value	q-value	Gene Feature	Biotype	Rank
203701_s_at	TRMT1	NM_001136035	tRNA methyltransferase 1 homolog (S. cerevisiae)	9.00007	9.39991	-4.0183	-1.31936	0.000181	0.092563	down	coding	1
219271_at	GALNT14	NM_001253826	UDP-N-acetyl-alpha-D-galactosamine:polypeptide N-acetylgalactosaminyltransferase 14 (GalNAc-T14)	8.44164	6.21706	3.8875	4.67374	0.000248	0.104277	up	coding	2
201926_s_at	CD55	NM_000574	CD55 molecule, decay accelerating factor for complement (Cromer blood group)	12.3021	11.5385	3.83456	1.69771	0.00028	0.104277	up	coding	3
202131_s_at	RIOK3	NM_003831	RIO kinase 3	8.35825	7.69375	3.77627	1.58502	0.000321	0.104277	up	coding	4
213493_at	SNED1	NM_001080437	sushi, nidogen and EGF-like domains 1	6.8564	7.83321	-3.73562	-1.96811	0.000359	0.092563	down	coding	5
218494_s_at	SLC2A4RG	NM_020062	SLC2A4 regulator	7.08457	7.54874	-3.64551	-1.37952	0.000439	0.092563	down	coding	6
201925_s_at	CD55	NM_000574	CD55 molecule, decay accelerating factor for complement (Cromer blood group)	12.0176	11.4548	3.62664	1.47721	0.00046	0.104277	up	coding	7
221868_at	PAIP2B	NM_020459	poly(A) binding protein interacting protein 2B	7.95296	8.70613	-3.62117	-1.68548	0.000467	0.092563	down	coding	8
208950_s_at	ALDH7A1	NM_001182	aldehyde dehydrogenase 7 family, member A1	6.17262	6.68938	-3.61998	-1.43074	0.00047	0.092563	down	coding	9
216909_at	RRP12	NM_001145114	ribosomal RNA processing 12 homolog (S. cerevisiae)	4.13548	3.85046	3.59386	1.21843	0.000503	0.104277	up	coding	10
220885_s_at	CENPJ	NM_018451	centromere protein J	8.42388	8.95121	-3.57389	-1.44127	0.000529	0.092563	down	coding	11
37254_at	ZNF133	NM_001083330	zinc finger protein 133	8.84173	9.29345	-3.56754	-1.36767	0.00054	0.092563	down	coding	12
202588_at	AK1	NM_000476	adenylate kinase 1	7.1896	7.60055	-3.5356	-1.32955	0.000585	0.092563	down	coding	13
200974_at	ACTA2	NM_001141945	actin, alpha 2, smooth muscle, aorta	9.09733	7.70145	3.53368	2.63149	0.000588	0.104277	up	coding	14
219419_at	RBFA	NM_001171967	ribosome binding factor A (putative)	8.65392	9.28426	-3.50985	-1.54794	0.00063	0.092563	down	coding	15
202438_x_at	IDS	NM_000202	iduronate 2-sulfatase	7.64577	7.12199	3.50836	1.43772	0.000631	0.104277	up	coding	16
202554_s_at	GSTM3	NM_000849	glutathione S-transferase mu 3 (brain)	7.47921	8.83893	-3.48833	-2.56635	0.000668	0.092563	down	coding	17
220222_at	RBM12B-AS1	NM_018608	RBM12B antisense RNA 1	6.67036	7.32287	-3.48259	-1.5719	0.000676	0.092563	down	coding	18
213524_s_at	G0S2	NM_015714	G0/G1switch 2	8.04942	6.73093	3.46291	2.49405	0.000711	0.104277	up	coding	19
201704_at	ENTPD6	NM_001114089	ectonucleoside triphosphate diphosphohydrolase 6 (putative)	9.60588	10.025	-3.46329	-1.3371	0.000711	0.092563	down	coding	20
215783_s_at	ALPL	NM_000478	alkaline phosphatase, liver/bone/kidney	10.9138	9.15971	3.4628	3.37313	0.000712	0.104277	up	coding	21
208913_at	GGA2	NM_015044	golgi-associated, gamma adaptin ear containing, ARF binding protein 2	10.8368	11.4462	-3.45699	-1.52567	0.000721	0.092563	down	coding	22
215128_at	---	---	---	6.02277	6.8387	-3.45239	-1.76043	0.00073	0.092563	down	coding	23
215488_at	---	---	---	5.87598	5.55545	3.45219	1.24879	0.000731	0.104277	up	coding	24
211505_s_at	STAU1	NM_001037328	staufen double-stranded RNA binding protein 1	9.86469	9.50019	3.44815	1.28743	0.000737	0.104277	up	coding	25
52164_at	C11orf24	NM_022338	chromosome 11 open reading frame 24	9.38302	9.87332	-3.42875	-1.40474	0.000777	0.092563	down	coding	26
210694_s_at	MID1	NM_000381	midline 1 (Opitz/BBB syndrome)	8.78352	9.60478	-3.42286	-1.76694	0.000787	0.092563	down	coding	27
216897_s_at	FAM76A	NM_001143912	family with sequence similarity 76, member A	5.98665	6.28019	-3.4134	-1.22565	0.000813	0.092563	down	coding	28
213648_at	EXOSC7	NM_015004	exosome component 7	9.50145	10.1105	-3.39864	-1.52529	0.000844	0.092563	down	coding	29
210858_x_at	ATM	NM_000051	ataxia telangiectasia mutated	7.76712	8.29082	-3.38355	-1.43763	0.00088	0.092563	down	coding	30
205179_s_at	ADAM8	NM_001109	ADAM metallopeptidase domain 8	7.00888	6.48692	3.3777	1.43591	0.000894	0.104277	up	coding	31
64474_g_at	DGCR8	NM_001190326	DGCR8 microprocessor complex subunit	8.99584	9.86033	-3.37684	-1.82069	0.000897	0.092563	down	coding	32
206453_s_at	NDRG2	NM_016250	NDRG family member 2	7.73442	8.51781	-3.37567	-1.72118	0.000901	0.092563	down	coding	33
219253_at	TMEM185B	NM_024121	transmembrane protein 185B	8.62767	7.90279	3.36894	1.65277	0.000916	0.104277	up	coding	34
222088_s_at	SLC2A14	NM_006931	solute carrier family 2 (facilitated glucose transporter), member 14	12.0119	11.1307	3.3516	1.84187	0.000964	0.104277	up	coding	35
220820_at	---	---	---	6.09254	6.63067	-3.34861	-1.45209	0.000973	0.092563	down	coding	36
221485_at	B4GALT5	NM_004776	UDP-Gal:betaGlcNAc beta 1,4- galactosyltransferase, polypeptide 5	11.9632	11.1347	3.34162	1.77584	0.000996	0.104277	up	coding	37
40560_at	TBX2	NM_005994	T-box 2	4.30176	4.07373	3.33915	1.17123	0.001001	0.104277	up	coding	38
212088_at	PMPCA	NM_015160	peptidase (mitochondrial processing) alpha	9.15599	9.5758	-3.3311	-1.33776	0.001023	0.092563	down	coding	39
204308_s_at	TECPR2	NM_001172631	tectonin beta-propeller repeat containing 2	9.96541	8.85246	3.32621	2.16287	0.001037	0.104277	up	coding	40
218999_at	TMEM140	NM_018295	transmembrane protein 140	12.7371	11.8652	3.32065	1.83002	0.001051	0.104277	up	coding	41
222345_at	---	---	---	8.46606	9.0456	-3.31975	-1.49437	0.001054	0.092563	down	coding	42
202104_s_at	SPG7	NM_003119	spastic paraplegia 7 (pure and complicated autosomal recessive)	8.23748	8.70739	-3.31171	-1.38503	0.001078	0.092563	down	coding	43
219333_s_at	CAPN10	NM_021251	calpain 10	7.98785	8.36292	-3.3091	-1.2969	0.001086	0.092563	down	coding	44
204082_at	PBX3	NM_001134778	pre-B-cell leukemia homeobox 3	8.57464	8.88106	-3.29989	-1.23663	0.001119	0.092563	down	coding	45
221010_s_at	SIRT5	NM_001193267	sirtuin 5	7.1032	7.74711	-3.29584	-1.56257	0.001131	0.092563	down	coding	46
210140_at	CST7	NM_003650	cystatin F (leukocystatin)	13.4517	12.7494	3.28883	1.62706	0.001156	0.104277	up	coding	47
218324_s_at	SPATS2	NM_023071	spermatogenesis associated, serine-rich 2	7.66282	8.26853	-3.28681	-1.52172	0.001163	0.092563	down	coding	48
215719_x_at	FAS	NM_000043	Fas cell surface death receptor	9.63345	8.14103	3.28055	2.8136	0.001181	0.104277	up	coding	49
203707_at	LINC00921	NM_005741	long intergenic non-protein coding RNA 921	8.90362	9.33523	-3.27901	-1.34874	0.001186	0.092563	down	coding	50
64371_at	SUGP2	NM_001017392	SURP and G patch domain containing 2	8.80116	9.21798	-3.27482	-1.33498	0.001201	0.092563	down	coding	51
222131_x_at	RHOT2	NM_138769	ras homolog family member T2	9.25539	9.60183	-3.27448	-1.27141	0.001203	0.092563	down	coding	52
221789_x_at	RHOT2	NM_138769	ras homolog family member T2	9.5882	9.91368	-3.27139	-1.25308	0.001213	0.092563	down	coding	53
214494_s_at	SPG7	NM_003119	spastic paraplegia 7 (pure and complicated autosomal recessive)	9.82009	10.2656	-3.27045	-1.36182	0.001216	0.092563	down	coding	54
216252_x_at	FAS	NM_000043	Fas cell surface death receptor	9.37736	7.88108	3.26092	2.82115	0.001249	0.104277	up	coding	55
213804_at	INPP5B	NM_005540	inositol polyphosphate-5-phosphatase, 75kDa	8.76406	9.38467	-3.25968	-1.53752	0.001254	0.092563	down	coding	56
219941_at	TMEM19	NM_018279	transmembrane protein 19	6.05732	6.69313	-3.25853	-1.55381	0.001259	0.092563	down	coding	57
215838_at	LILRA5	NM_021250	leukocyte immunoglobulin-like receptor, subfamily A (with TM domain), member 5	10.1542	8.64657	3.24968	2.84349	0.001292	0.104277	up	coding	58
214243_s_at	SERHL	NM_014509	serine hydrolase-like	7.24033	7.70295	-3.24722	-1.37805	0.001301	0.092563	down	coding	59
201978_s_at	KIAA0141	NM_001142603	KIAA0141	9.94068	10.1546	-3.24122	-1.15986	0.001323	0.092563	down	coding	60
221920_s_at	SLC25A37	NM_016612	solute carrier family 25 (mitochondrial iron transporter), member 37	12.9096	12.4371	3.23854	1.38752	0.001332	0.104277	up	coding	61
215289_at	ZNF749	NM_001023561	zinc finger protein 749	4.68364	5.19803	-3.23567	-1.42839	0.001342	0.092563	down	coding	62
211735_x_at	SFTPC	NM_001172357	surfactant protein C	5.09916	4.84463	3.23184	1.19294	0.001355	0.104277	up	coding	63
213976_at	CIZ1	NM_001131015	CDKN1A interacting zinc finger protein 1	8.19906	8.60949	-3.22893	-1.32908	0.001363	0.092563	down	coding	64
221215_s_at	RIPK4	NM_020639	receptor-interacting serine-threonine kinase 4	6.14059	6.9515	-3.22491	-1.75432	0.001379	0.092563	down	coding	65
208806_at	CHD3	NM_001005271	chromodomain helicase DNA binding protein 3	10.0344	10.6969	-3.22418	-1.5828	0.001381	0.092563	down	coding	66
218012_at	TSPYL2	NM_022117	TSPY-like 2	9.61337	10.3327	-3.21679	-1.64641	0.00141	0.092563	down	coding	67
202726_at	LIG1	NM_000234	ligase I, DNA, ATP-dependent	8.97794	9.47339	-3.21217	-1.40976	0.001429	0.092563	down	coding	68
217552_x_at	CR1	NM_000573	complement component (3b/4b) receptor 1 (Knops blood group)	9.22846	8.10992	3.20834	2.17127	0.001445	0.104277	up	coding	69
211711_s_at	PTEN	NM_000314	phosphatase and tensin homolog	12.079	11.6916	3.20203	1.30804	0.001473	0.104277	up	coding	70
219622_at	RAB20	NM_017817	RAB20, member RAS oncogene family	9.41874	8.08894	3.20057	2.51368	0.001478	0.104277	up	coding	71
214461_at	LBP	NM_004139	lipopolysaccharide binding protein	4.75504	4.41712	3.1927	1.26394	0.001512	0.104277	up	coding	72
208779_x_at	DDR1	NM_001202521	discoidin domain receptor tyrosine kinase 1	7.61886	8.18389	-3.19238	-1.47941	0.001513	0.092563	down	coding	73
201670_s_at	MARCKS	NM_002356	myristoylated alanine-rich protein kinase C substrate	12.1799	11.775	3.18989	1.32395	0.001524	0.104277	up	coding	74
215123_at	LOC613037	NM_001135865	nuclear pore complex interacting protein pseudogene	7.23219	7.9205	-3.18328	-1.61139	0.00155	0.092563	down	coding	75
203952_at	ATF6	NM_007348	activating transcription factor 6	9.59904	8.8552	3.17839	1.67463	0.001569	0.104277	up	coding	76
217755_at	HN1	NM_001002032	hematological and neurological expressed 1	11.9615	11.3372	3.17579	1.5414	0.001579	0.104277	up	coding	77
218472_s_at	PELO	NM_015946	pelota homolog (Drosophila)	9.96672	9.31479	3.1652	1.57127	0.001626	0.104277	up	coding	78
206522_at	MGAM	NM_004668	maltase-glucoamylase (alpha-glucosidase)	12.3857	11.5754	3.15996	1.75355	0.001649	0.104277	up	coding	79
216236_s_at	SLC2A14	NM_006931	solute carrier family 2 (facilitated glucose transporter), member 14	11.2309	10.1438	3.15903	2.12439	0.001652	0.104277	up	coding	80
213810_s_at	AKIRIN2-AS1	---	NULL	10.1048	9.407	3.15738	1.62207	0.001659	0.104277	up	coding	81
210463_x_at	TRMT1	NM_001136035	tRNA methyltransferase 1 homolog (S. cerevisiae)	9.11126	9.39279	-3.15393	-1.21548	0.001676	0.092563	down	coding	82
209369_at	ANXA3	NM_005139	annexin A3	11.2073	8.73812	3.1536	5.53744	0.001677	0.104277	up	coding	83
216168_at	---	---	---	5.00572	5.61939	-3.15374	-1.53014	0.001677	0.092563	down	coding	84
206264_at	GPLD1	NM_001503	glycosylphosphatidylinositol specific phospholipase D1	4.89158	5.69806	-3.15247	-1.74894	0.001682	0.092563	down	coding	85
216357_at	SNX1	NM_001242933	sorting nexin 1	6.92974	7.50698	-3.15226	-1.492	0.001683	0.092563	down	coding	86
219122_s_at	THG1L	NM_017872	tRNA-histidine guanylyltransferase 1-like (S. cerevisiae)	8.42067	8.75728	-3.14841	-1.26279	0.001701	0.092563	down	coding	87
202499_s_at	SLC2A3	NM_006931	solute carrier family 2 (facilitated glucose transporter), member 3	12.4453	11.8029	3.14793	1.56093	0.001703	0.104277	up	coding	88
211823_s_at	PXN	NM_001080855	paxillin	5.78962	5.41189	3.14725	1.2993	0.001705	0.104277	up	coding	89
221216_s_at	SCMH1	NM_001031694	sex comb on midleg homolog 1 (Drosophila)	7.82851	8.38998	-3.14628	-1.47577	0.001711	0.092563	down	coding	90
212921_at	SMYD2	NM_020197	SET and MYND domain containing 2	7.89227	8.58871	-3.14454	-1.6205	0.001717	0.092563	down	coding	91
213819_s_at	FLOT1	NM_005803	flotillin 1	10.357	9.45037	3.14377	1.87466	0.001721	0.104277	up	coding	92
201313_at	ENO2	NM_001975	enolase 2 (gamma, neuronal)	9.35048	10.0026	-3.13812	-1.5715	0.001751	0.092563	down	coding	93
218378_s_at	LOC100630923	NM_024653	LOC100289561-PRKRIP1 readthrough	10.3502	10.688	-3.13786	-1.26381	0.001752	0.092563	down	coding	94
208664_s_at	TTC3	NM_001001894	tetratricopeptide repeat domain 3	8.33799	9.0828	-3.13646	-1.67575	0.001758	0.092563	down	coding	95
216263_s_at	NGDN	NM_001042635	neuroguidin, EIF4E binding protein	7.87765	8.52649	-3.13555	-1.56791	0.001763	0.092563	down	coding	96
206701_x_at	EDNRB	NM_000115	endothelin receptor type B	4.33282	3.60367	3.13175	1.65766	0.001784	0.104277	up	coding	97
202200_s_at	SRPK1	NM_003137	SRSF protein kinase 1	11.6369	11.0347	3.12991	1.51809	0.001794	0.104277	up	coding	98
218136_s_at	SLC25A37	NM_016612	solute carrier family 25 (mitochondrial iron transporter), member 37	13.0726	12.6702	3.12789	1.32166	0.001804	0.104277	up	coding	99
220034_at	IRAK3	NM_001142523	interleukin-1 receptor-associated kinase 3	9.69984	8.53957	3.12751	2.235	0.001806	0.104277	up	coding	100
218798_at	KRI1	NM_023008	KRI1 homolog (S. cerevisiae)	8.82133	9.27604	-3.11752	-1.3705	0.001859	0.092563	down	coding	101
202375_at	SEC24D	NM_014822	SEC24 family, member D (S. cerevisiae)	8.41828	7.72179	3.11521	1.62056	0.001872	0.104277	up	coding	102
201613_s_at	AP1G2	NM_003917	adaptor-related protein complex 1, gamma 2 subunit	11.0323	11.3583	-3.11408	-1.25351	0.001879	0.092563	down	coding	103
207108_s_at	NIPBL	NM_015384	Nipped-B homolog (Drosophila)	9.84991	9.51623	3.11088	1.26022	0.001895	0.104277	up	coding	104
219401_at	XYLT2	NM_022167	xylosyltransferase II	10.4892	10.9757	-3.11016	-1.40102	0.0019	0.092563	down	coding	105
206409_at	TIAM1	NM_003253	T-cell lymphoma invasion and metastasis 1	10.3373	10.9687	-3.10632	-1.54903	0.001919	0.092563	down	coding	106
214723_x_at	ANKRD36	NM_001164315	ankyrin repeat domain 36	9.66184	10.2532	-3.10323	-1.50669	0.001938	0.092563	down	coding	107
216662_at	MYO7B	NM_001080527	myosin VIIB	5.48711	5.25985	3.10217	1.17062	0.001942	0.104277	up	coding	108
213623_at	KIF3A	NM_007054	kinesin family member 3A	5.4678	6.20777	-3.10122	-1.67014	0.001948	0.092563	down	coding	109
217203_at	GLULP4	---	glutamate-ammonia ligase (glutamine synthetase) pseudogene 4	6.09149	5.67629	3.09976	1.33348	0.001957	0.104277	up	coding	110
207042_at	E2F2	NM_004091	E2F transcription factor 2	6.0657	5.50531	3.09903	1.47467	0.001961	0.104277	up	coding	111
201328_at	ETS2	NM_001256295	v-ets erythroblastosis virus E26 oncogene homolog 2 (avian)	11.3886	10.6392	3.09795	1.68105	0.001966	0.104277	up	coding	112
216031_x_at	HN1L	NM_144570	hematological and neurological expressed 1-like	5.98405	6.42719	-3.09738	-1.35956	0.001971	0.092563	down	coding	113
209189_at	FOS	NM_005252	FBJ murine osteosarcoma viral oncogene homolog	10.2672	9.38753	3.09541	1.83994	0.001983	0.104277	up	coding	114
213641_at	ZNF500	NM_021646	zinc finger protein 500	7.05153	7.57329	-3.09379	-1.43571	0.001994	0.092563	down	coding	115
210166_at	TLR5	NM_003268	toll-like receptor 5	10.6967	9.17541	3.09228	2.87044	0.002002	0.104277	up	coding	116
200985_s_at	CD59	NM_000611	CD59 molecule, complement regulatory protein	12.5063	11.6983	3.09183	1.75087	0.002003	0.104277	up	coding	117
202498_s_at	SLC2A3	NM_006931	solute carrier family 2 (facilitated glucose transporter), member 3	10.9573	9.90503	3.09068	2.07383	0.002011	0.104277	up	coding	118
205016_at	TGFA	NM_001099691	transforming growth factor, alpha	9.48782	8.03949	3.08997	2.72892	0.002014	0.104277	up	coding	119
220603_s_at	MCTP2	NM_001159643	multiple C2 domains, transmembrane 2	10.6343	9.44052	3.08739	2.28757	0.00203	0.104277	up	coding	120
220882_at	---	---	---	7.01568	7.80361	-3.08269	-1.7266	0.002059	0.092563	down	coding	121
206911_at	TRIM25	NM_005082	tripartite motif containing 25	7.63223	6.61886	3.08015	2.01862	0.002073	0.104277	up	coding	122
32069_at	N4BP1	NM_153029	NEDD4 binding protein 1	11.6893	11.1592	3.07923	1.44406	0.002081	0.104277	up	coding	123
215030_at	GRSF1	NM_001098477	G-rich RNA sequence binding factor 1	7.97292	8.48898	-3.07908	-1.43005	0.002082	0.092563	down	coding	124
218881_s_at	FOSL2	NM_005253	FOS-like antigen 2	7.43791	6.50921	3.07621	1.90356	0.002099	0.104277	up	coding	125
208749_x_at	FLOT1	NM_005803	flotillin 1	12.557	11.9701	3.07396	1.50206	0.002111	0.104277	up	coding	126
204507_s_at	PPP3R1	NM_000945	protein phosphatase 3, regulatory subunit B, alpha	9.85471	9.2938	3.07306	1.47519	0.002114	0.104277	up	coding	127
210563_x_at	CFLAR	NM_001127183	CASP8 and FADD-like apoptosis regulator	10.8717	10.1457	3.07033	1.65409	0.002132	0.104277	up	coding	128
212475_at	AVL9	NM_015060	AVL9 homolog (S. cerevisiase)	8.27426	7.7862	3.07027	1.40255	0.002133	0.104277	up	coding	129
214304_x_at	OTTHUMG00000171895	---	NULL	6.14159	5.70434	3.06684	1.35403	0.002156	0.104277	up	coding	130
221548_s_at	ILKAP	NM_030768	integrin-linked kinase-associated serine/threonine phosphatase	10.0209	10.3401	-3.06484	-1.24765	0.002166	0.092563	down	coding	131
222134_at	DDO	NM_003649	D-aspartate oxidase	3.3911	4.01245	-3.06313	-1.53831	0.002177	0.092563	down	coding	132
212539_at	CHD1L	NM_001256336	chromodomain helicase DNA binding protein 1-like	10.3644	10.8362	-3.05896	-1.3868	0.002205	0.092563	down	coding	133
33646_g_at	GM2A	NM_000405	GM2 ganglioside activator	6.72223	5.43183	3.05621	2.44596	0.002217	0.104277	up	coding	134
81737_at	LOC100505915	XR_109261	uncharacterized LOC100505915	8.13253	8.67567	-3.0548	-1.45714	0.002226	0.092563	down	coding	135
202993_at	ILVBL	NM_006844	ilvB (bacterial acetolactate synthase)-like	7.57542	7.97971	-3.05246	-1.32343	0.002242	0.092563	down	coding	136
208116_s_at	MAN1A1	NM_005907	mannosidase, alpha, class 1A, member 1	7.80884	6.75701	3.04984	2.07316	0.002262	0.104277	up	coding	137
208470_s_at	HP	NM_001126102	haptoglobin	9.62975	7.60073	3.04963	4.08128	0.002263	0.104277	up	coding	138
209091_s_at	SH3GLB1	NM_001206651	SH3-domain GRB2-like endophilin B1	11.4588	10.6032	3.04953	1.80956	0.002264	0.104277	up	coding	139
206618_at	IL18R1	NM_003855	interleukin 18 receptor 1	9.92838	8.81099	3.04666	2.16955	0.002281	0.104277	up	coding	140
212804_s_at	GAPVD1	NM_015635	GTPase activating protein and VPS9 domains 1	8.46955	8.12733	3.04562	1.26771	0.002287	0.104277	up	coding	141
207275_s_at	ACSL1	NM_001995	acyl-CoA synthetase long-chain family member 1	12.6356	11.6106	3.04532	2.03502	0.002289	0.104277	up	coding	142
215839_at	LILRA5	NM_021250	leukocyte immunoglobulin-like receptor, subfamily A (with TM domain), member 5	9.61437	8.22179	3.03548	2.62548	0.00235	0.104277	up	coding	143
204307_at	TECPR2	NM_001172631	tectonin beta-propeller repeat containing 2	9.36321	8.17248	3.03444	2.28268	0.002357	0.104277	up	coding	144
218924_s_at	CTBS	NM_004388	chitobiase, di-N-acetyl-	10.3939	9.64365	3.0336	1.68211	0.002362	0.104277	up	coding	145
204447_at	LZTS3	NM_014731	leucine zipper, putative tumor suppressor family member 3	5.65078	6.19913	-3.03257	-1.46241	0.00237	0.092563	down	coding	146
222073_at	COL4A3	NM_000091	collagen, type IV, alpha 3 (Goodpasture antigen)	6.25126	7.1975	-3.02554	-1.92685	0.002421	0.092563	down	coding	147
206997_s_at	HS6ST1	NM_004807	heparan sulfate 6-O-sulfotransferase 1	6.41174	6.1403	3.02387	1.20701	0.002432	0.104277	up	coding	148
206697_s_at	HP	NM_001126102	haptoglobin	10.179	8.13709	3.02247	4.11777	0.002441	0.104277	up	coding	149
211924_s_at	PLAUR	NM_001005376	plasminogen activator, urokinase receptor	10.8612	9.92106	3.02167	1.91874	0.002445	0.104277	up	coding	150
212000_at	SUGP2	NM_001017392	SURP and G patch domain containing 2	8.57612	8.97104	-3.02133	-1.31488	0.002447	0.092563	down	coding	151
217202_s_at	GLUL	NM_001033044	glutamate-ammonia ligase	10.628	9.88809	3.01896	1.67011	0.002461	0.104277	up	coding	152
218199_s_at	NOL6	NM_022917	nucleolar protein 6 (RNA-associated)	8.09624	8.50792	-3.01453	-1.33023	0.002489	0.092563	down	coding	153
212864_at	CDS2	NM_003818	CDP-diacylglycerol synthase (phosphatidate cytidylyltransferase) 2	11.5351	11.0037	3.01147	1.44532	0.002507	0.104277	up	coding	154
214639_s_at	HOXA1	NM_005522	homeobox A1	6.72552	6.03189	3.01123	1.61735	0.002509	0.104277	up	coding	155
218978_s_at	SLC25A37	NM_016612	solute carrier family 25 (mitochondrial iron transporter), member 37	9.557	8.25435	3.00972	2.46682	0.002519	0.104277	up	coding	156
215474_at	---	---	---	5.38615	5.91528	-3.00877	-1.44306	0.002523	0.092563	down	coding	157
203765_at	GCA	NM_012198	grancalcin, EF-hand calcium binding protein	11.5815	10.8291	3.00683	1.68461	0.002536	0.104277	up	coding	158
220590_at	ITFG2	NM_018463	integrin alpha FG-GAP repeat containing 2	8.58308	9.08546	-3.00384	-1.41655	0.002554	0.092563	down	coding	159
212598_at	WDFY3	NM_014991	WD repeat and FYVE domain containing 3	9.49334	8.12139	3.0033	2.58819	0.002558	0.104277	up	coding	160
221649_s_at	PPAN	NM_001040664	peter pan homolog (Drosophila)	8.81941	9.25851	-3.00323	-1.35576	0.002559	0.092563	down	coding	161
202497_x_at	SLC2A3	NM_006931	solute carrier family 2 (facilitated glucose transporter), member 3	11.8737	10.9208	3.00118	1.93573	0.002574	0.104277	up	coding	162
220864_s_at	NDUFA13	NM_015965	NADH dehydrogenase (ubiquinone) 1 alpha subcomplex, 13	11.6599	11.872	-3.00047	-1.15836	0.002578	0.092563	down	coding	163
202464_s_at	PFKFB3	NM_001145443	6-phosphofructo-2-kinase/fructose-2,6-biphosphatase 3	12.6506	11.9904	2.99999	1.58031	0.002581	0.104277	up	coding	164
205568_at	AQP9	NM_020980	aquaporin 9	12.8149	12.184	2.99984	1.5486	0.002583	0.104277	up	coding	165
205258_at	INHBB	NM_002193	inhibin, beta B	6.22506	5.70272	2.99967	1.43628	0.002583	0.104277	up	coding	166
221716_s_at	ACSBG2	NM_030924	acyl-CoA synthetase bubblegum family member 2	4.58919	5.08131	-2.99712	-1.40651	0.002602	0.092563	down	coding	167
210101_x_at	SH3GLB1	NM_001206651	SH3-domain GRB2-like endophilin B1	11.6929	10.8694	2.99557	1.76973	0.002612	0.104277	up	coding	168
209939_x_at	CFLAR	NM_001127183	CASP8 and FADD-like apoptosis regulator	10.9086	10.2194	2.9955	1.61237	0.002612	0.104277	up	coding	169
203950_s_at	CLCN6	NM_001256959	chloride channel, voltage-sensitive 6	8.6784	8.94449	-2.99511	-1.20255	0.002617	0.092563	down	coding	170
205081_at	CRIP1	NM_001311	cysteine-rich protein 1 (intestinal)	12.0762	12.4592	-2.99457	-1.30407	0.002621	0.092563	down	coding	171
214455_at	HIST1H2BC	NM_003518	histone cluster 1, H2bc	8.66171	7.58727	2.99406	2.10591	0.002624	0.104277	up	coding	172
212769_at	TLE3	NM_001105192	transducin-like enhancer of split 3 (E(sp1) homolog, Drosophila)	10.2523	9.53566	2.99374	1.64334	0.002628	0.104277	up	coding	173
214364_at	MTERFD2	NM_182501	MTERF domain containing 2	8.3747	8.82769	-2.99053	-1.36887	0.00265	0.092563	down	coding	174
217820_s_at	ENAH	NM_001008493	enabled homolog (Drosophila)	4.39403	5.20418	-2.98913	-1.75338	0.002661	0.092563	down	coding	175
202771_at	PIEZO1	NM_001142864	piezo-type mechanosensitive ion channel component 1	9.26437	9.62952	-2.98662	-1.28802	0.002679	0.092563	down	coding	176
222034_at	GNB2L1	NM_006098	guanine nucleotide binding protein (G protein), beta polypeptide 2-like 1	9.61251	10.0376	-2.98558	-1.34266	0.002687	0.092563	down	coding	177
214081_at	PLXDC1	NM_020405	plexin domain containing 1	7.63083	8.71637	-2.98487	-2.12217	0.002693	0.092563	down	coding	178
217667_at	SEC14L1P1	NR_026952	SEC14-like 1 pseudogene 1	7.21396	7.66406	-2.98418	-1.36613	0.002699	0.092563	down	coding	179
219627_at	ZNF767	NM_024910	zinc finger family member 767	9.85507	10.2288	-2.98386	-1.29566	0.002701	0.092563	down	coding	180
209733_at	MID2	NM_012216	midline 2	6.08549	6.90901	-2.98131	-1.76972	0.002718	0.092563	down	coding	181
218479_s_at	XPO4	NM_022459	exportin 4	7.56935	7.96908	-2.97948	-1.31926	0.002729	0.092563	down	coding	182
210142_x_at	FLOT1	NM_005803	flotillin 1	12.4218	11.8394	2.97941	1.49733	0.00273	0.104277	up	coding	183
217786_at	PRMT5	NM_001039619	protein arginine methyltransferase 5	9.44795	8.96367	2.97859	1.39889	0.002734	0.104277	up	coding	184
213310_at	CTA-204B4.6	---	NULL	8.12161	7.73273	2.97848	1.30937	0.002735	0.104277	up	coding	185
210624_s_at	ILVBL	NM_006844	ilvB (bacterial acetolactate synthase)-like	7.22529	7.64265	-2.97792	-1.33548	0.002741	0.092563	down	coding	186
215080_s_at	AGAP2	NM_001122772	ArfGAP with GTPase domain, ankyrin repeat and PH domain 2	5.8436	5.59289	2.97764	1.18979	0.002743	0.104277	up	coding	187
219139_s_at	CROCCP3	NR_023386	ciliary rootlet coiled-coil, rootletin pseudogene 3	7.76865	8.28095	-2.97575	-1.42633	0.002757	0.092563	down	coding	188
202261_at	VPS72	NM_001271087	vacuolar protein sorting 72 homolog (S. cerevisiae)	9.45622	9.71774	-2.97561	-1.19874	0.002758	0.092563	down	coding	189
209876_at	GIT2	NM_001135213	G protein-coupled receptor kinase interacting ArfGAP 2	9.17785	8.63778	2.97497	1.45404	0.002763	0.104277	up	coding	190
209727_at	GM2A	NM_000405	GM2 ganglioside activator	7.6443	6.48858	2.97479	2.22795	0.002764	0.104277	up	coding	191
200939_s_at	RERE	NM_001042681	arginine-glutamic acid dipeptide (RE) repeats	6.32504	5.46331	2.97484	1.81721	0.002764	0.104277	up	coding	192
206136_at	FZD5	NM_003468	frizzled family receptor 5	5.17583	4.67915	2.97213	1.41096	0.002787	0.104277	up	coding	193
207977_s_at	DPT	NM_001937	dermatopontin	4.79262	4.49614	2.96775	1.22815	0.002821	0.104277	up	coding	194
216958_s_at	IVD	NM_001159508	isovaleryl-CoA dehydrogenase	8.1836	8.69753	-2.96716	-1.42793	0.002825	0.092563	down	coding	195
213842_x_at	NSUN5P1	NM_001039487	NOP2/Sun domain family, member 5 pseudogene 1	10.2345	10.6904	-2.96639	-1.37164	0.002831	0.092563	down	coding	196
215891_s_at	GM2A	NM_000405	GM2 ganglioside activator	6.43982	5.12464	2.96392	2.48833	0.00285	0.104277	up	coding	197
217324_at	---	---	---	3.7093	3.50652	2.96179	1.15091	0.002868	0.104277	up	coding	198
201044_x_at	DUSP1	NM_004417	dual specificity phosphatase 1	6.78995	6.49523	2.95856	1.22665	0.002893	0.104277	up	coding	199
212051_at	WIPF2	NM_133264	WAS/WASL interacting protein family, member 2	8.94955	8.48353	2.95679	1.38129	0.002908	0.104277	up	coding	200
201554_x_at	GYG1	NM_001184720	glycogenin 1	10.8285	9.69442	2.95663	2.19483	0.00291	0.104277	up	coding	201
218325_s_at	DIDO1	NM_001193369	death inducer-obliterator 1	11.0335	11.5345	-2.95479	-1.41525	0.002921	0.092563	down	coding	202
221928_at	ACACB	NM_001093	acetyl-CoA carboxylase beta	9.17478	9.95957	-2.95426	-1.72284	0.002926	0.092563	down	coding	203
200648_s_at	GLUL	NM_001033044	glutamate-ammonia ligase	11.9175	11.3085	2.95268	1.52518	0.002939	0.104277	up	coding	204
217101_at	TTC39A	NM_001080494	tetratricopeptide repeat domain 39A	6.20474	5.94097	2.95217	1.20061	0.002942	0.104277	up	coding	205
215211_at	RRN3P1	NR_003370	RNA polymerase I transcription factor homolog (S. cerevisiae) pseudogene 1	6.90681	7.83788	-2.95076	-1.90669	0.002953	0.092563	down	coding	206
216586_at	---	---	---	4.53578	4.26169	2.9503	1.20923	0.002956	0.104277	up	coding	207
209155_s_at	NT5C2	NM_001134373	5'-nucleotidase, cytosolic II	10.6093	10.1949	2.95012	1.33272	0.002959	0.104277	up	coding	208
205271_s_at	CDK20	NM_001039803	cyclin-dependent kinase 20	7.53049	7.90767	-2.95012	-1.2988	0.002959	0.092563	down	coding	209
215485_s_at	ICAM1	NM_000201	intercellular adhesion molecule 1	6.9346	6.19852	2.94991	1.66564	0.00296	0.104277	up	coding	210
217966_s_at	FAM129A	NM_052966	family with sequence similarity 129, member A	11.4378	10.4718	2.94659	1.95344	0.002987	0.104277	up	coding	211
201350_at	FLOT2	NM_004475	flotillin 2	12.1504	11.5632	2.94376	1.50227	0.003016	0.104277	up	coding	212
213235_at	KNOP1	NM_001012991	lysine-rich nucleolar protein 1	8.97039	9.46832	-2.9436	-1.41219	0.003019	0.092563	down	coding	213
210793_s_at	NUP98	NM_005387	nucleoporin 98kDa	9.64183	9.3153	2.94053	1.254	0.003046	0.104277	up	coding	214
211806_s_at	KCNJ15	NM_001276435	potassium inwardly-rectifying channel, subfamily J, member 15	11.4781	10.2385	2.93882	2.36128	0.00306	0.104277	up	coding	215
217575_s_at	---	---	---	6.91576	6.31989	2.93817	1.51138	0.003064	0.104277	up	coding	216
206472_s_at	TLE3	NM_001105192	transducin-like enhancer of split 3 (E(sp1) homolog, Drosophila)	10.4717	9.72776	2.93756	1.67474	0.003068	0.104277	up	coding	217
203044_at	CHSY1	NM_014918	chondroitin sulfate synthase 1	11.1405	10.54	2.93458	1.51626	0.003093	0.104277	up	coding	218
202914_s_at	ARHGEF11	NM_014784	Rho guanine nucleotide exchange factor (GEF) 11	7.47011	6.79879	2.93409	1.59252	0.003097	0.104277	up	coding	219
217276_x_at	SERHL2	NM_014509	serine hydrolase-like 2	6.2551	6.65385	-2.93057	-1.31837	0.003134	0.092563	down	coding	220
217060_at	TRBV16	---	T cell receptor beta variable 16 (gene/pseudogene)	6.25831	7.01921	-2.92798	-1.69455	0.003156	0.092563	down	coding	221
220949_s_at	C7orf49	NM_001243749	chromosome 7 open reading frame 49	10.7502	10.2843	2.92659	1.38113	0.003169	0.104277	up	coding	222
215201_at	REPS1	NM_001128617	RALBP1 associated Eps domain containing 1	7.75253	8.23496	-2.92449	-1.39709	0.003187	0.092563	down	coding	223
202008_s_at	NID1	NM_002508	nidogen 1	3.9164	4.39616	-2.92416	-1.39451	0.00319	0.092563	down	coding	224
210582_s_at	LIMK2	NM_001031801	LIM domain kinase 2	11.9251	10.7577	2.92392	2.24601	0.003192	0.104277	up	coding	225
202430_s_at	PLSCR1	NM_021105	phospholipid scramblase 1	10.5409	9.09211	2.92381	2.72977	0.003193	0.104277	up	coding	226
203759_at	ST3GAL4	NM_001254757	ST3 beta-galactoside alpha-2,3-sialyltransferase 4	8.44161	7.29523	2.92367	2.21358	0.003195	0.104277	up	coding	227
205878_at	POU6F1	NM_002702	POU class 6 homeobox 1	8.03951	8.78788	-2.923	-1.67989	0.0032	0.092563	down	coding	228
215114_at	SENP3	NM_015670	SUMO1/sentrin/SMT3 specific peptidase 3	6.89732	7.36965	-2.92231	-1.38735	0.003208	0.092563	down	coding	229
208217_at	GABRR2	NM_002043	gamma-aminobutyric acid (GABA) A receptor, rho 2	5.43917	4.92754	2.92131	1.42566	0.003217	0.104277	up	coding	230
204119_s_at	ADK	NM_001123	adenosine kinase	10.0598	10.7015	-2.92113	-1.56018	0.003219	0.092563	down	coding	231
217299_s_at	NBN	NM_001024688	nibrin	9.62903	8.81652	2.91995	1.75626	0.003228	0.104277	up	coding	232
201340_s_at	ENC1	NM_001256574	ectodermal-neural cortex 1 (with BTB domain)	6.16085	5.55076	2.91717	1.52636	0.003254	0.104277	up	coding	233
218092_s_at	AGFG1	NM_001135187	ArfGAP with FG repeats 1	10.2464	9.69431	2.91656	1.46617	0.00326	0.104277	up	coding	234
206302_s_at	LOC100996752	NM_019094	uncharacterized LOC100996752	9.92976	9.25025	2.91592	1.6016	0.003265	0.104277	up	coding	235
220404_at	GPR97	NM_170776	G protein-coupled receptor 97	11.6451	10.6352	2.91362	2.01364	0.003285	0.104277	up	coding	236
213419_at	APBB2	NM_001166050	amyloid beta (A4) precursor protein-binding, family B, member 2	5.87991	6.69409	-2.91146	-1.7583	0.003306	0.092563	down	coding	237
222145_at	---	---	---	8.58195	9.06483	-2.90974	-1.39753	0.003322	0.092563	down	coding	238
221800_s_at	C17orf70	NM_025161	chromosome 17 open reading frame 70	8.06011	8.36521	-2.90964	-1.23551	0.003325	0.092563	down	coding	239
202101_s_at	RALB	NM_002881	v-ral simian leukemia viral oncogene homolog B (ras related; GTP binding protein)	8.74861	7.69588	2.90949	2.07445	0.003327	0.104277	up	coding	240
221549_at	GRWD1	NM_031485	glutamate-rich WD repeat containing 1	9.70631	10.1326	-2.90914	-1.3438	0.00333	0.092563	down	coding	241
213758_at	COX4I1	NM_001861	cytochrome c oxidase subunit IV isoform 1	8.21331	8.5433	-2.90816	-1.25701	0.003339	0.092563	down	coding	242
219748_at	TREML2	NM_024807	triggering receptor expressed on myeloid cells-like 2	10.5777	9.88345	2.90787	1.61801	0.003343	0.104277	up	coding	243
206246_at	PFKFB4	NM_004567	6-phosphofructo-2-kinase/fructose-2,6-biphosphatase 4	7.09603	6.40399	2.90415	1.61557	0.003377	0.104277	up	coding	244
207046_at	HIST1H4A	NM_001034077	histone cluster 1, H4a	6.28716	5.5718	2.90309	1.6419	0.003389	0.104277	up	coding	245
208788_at	ELOVL5	NM_001242828	ELOVL fatty acid elongase 5	11.9085	11.596	2.90253	1.24187	0.003395	0.104277	up	coding	246
212602_at	WDFY3	NM_014991	WD repeat and FYVE domain containing 3	9.5176	8.09557	2.90228	2.67963	0.003397	0.104277	up	coding	247
202100_at	RALB	NM_002881	v-ral simian leukemia viral oncogene homolog B (ras related; GTP binding protein)	11.9371	11.2722	2.90184	1.58539	0.003401	0.104277	up	coding	248
218754_at	NOL9	NM_024654	nucleolar protein 9	11.2805	11.7463	-2.90138	-1.38113	0.003404	0.092563	down	coding	249
211561_x_at	MAPK14	NM_001315	mitogen-activated protein kinase 14	10.5826	9.43848	2.90123	2.21016	0.003409	0.104277	up	coding	250
65770_at	RHOT2	NM_138769	ras homolog family member T2	9.60907	9.88307	-2.9009	-1.20915	0.003413	0.092563	down	coding	251
212463_at	CD59	NM_000611	CD59 molecule, complement regulatory protein	11.3054	10.2566	2.9002	2.06886	0.003418	0.104277	up	coding	252
202905_x_at	NBN	NM_001024688	nibrin	11.5955	11.0343	2.89897	1.47548	0.003429	0.104277	up	coding	253
213670_x_at	NSUN5P1	NM_001039575	NOP2/Sun domain family, member 5 pseudogene 1	10.3326	10.7981	-2.89469	-1.38081	0.003468	0.092563	down	coding	254
207764_s_at	HIPK3	NM_001048200	homeodomain interacting protein kinase 3	7.21252	6.50024	2.89422	1.63839	0.003472	0.104277	up	coding	255
209868_s_at	RBMS1	NM_002897	RNA binding motif, single stranded interacting protein 1	11.6653	11.1819	2.89351	1.39797	0.003478	0.104277	up	coding	256
216899_s_at	SKAP2	NM_003930	src kinase associated phosphoprotein 2	9.62379	8.68269	2.89292	1.91999	0.003484	0.104277	up	coding	257
208000_at	GML	NM_002066	glycosylphosphatidylinositol anchored molecule like	4.30139	4.70574	-2.89271	-1.32349	0.003485	0.092563	down	coding	258
205838_at	GYPA	NM_002099	glycophorin A (MNS blood group)	3.78179	3.38679	2.89175	1.31495	0.003493	0.104277	up	coding	259
216960_s_at	ZNF133	NM_001083330	zinc finger protein 133	8.43986	8.81953	-2.89028	-1.30104	0.003508	0.092563	down	coding	260
213963_s_at	SAP30	NM_003864	Sin3A-associated protein, 30kDa	5.59523	4.94348	2.89005	1.57108	0.003511	0.104277	up	coding	261
121_at	PAX8	NM_003466	paired box 8	7.20472	6.71413	2.88894	1.40502	0.003521	0.104277	up	coding	262
201738_at	EIF1B	NM_005875	eukaryotic translation initiation factor 1B	12.3323	12.0563	2.88884	1.21089	0.003522	0.104277	up	coding	263
217475_s_at	LIMK2	NM_001031801	LIM domain kinase 2	9.67847	9.19769	2.88308	1.39549	0.003582	0.104277	up	coding	264
201221_s_at	SNRNP70	NM_001009820	small nuclear ribonucleoprotein 70kDa (U1)	11.046	11.3856	-2.88256	-1.26538	0.003588	0.092563	down	coding	265
214367_at	RASGRP2	NM_001098670	RAS guanyl releasing protein 2 (calcium and DAG-regulated)	10.7323	11.0844	-2.88227	-1.27646	0.00359	0.092563	down	coding	266
204601_at	N4BP1	NM_153029	NEDD4 binding protein 1	10.6897	10.1105	2.88212	1.49397	0.003592	0.104277	up	coding	267
203176_s_at	TFAM	NM_001270782	transcription factor A, mitochondrial	8.85728	9.13296	-2.88196	-1.21057	0.003594	0.092563	down	coding	268
218507_at	HILPDA	NM_001098786	hypoxia inducible lipid droplet-associated	7.04397	7.51071	-2.88019	-1.38199	0.003613	0.092563	down	coding	269
217406_at	OTTHUMG00000150006	---	NULL	6.52502	6.92084	-2.8798	-1.31569	0.003617	0.092563	down	coding	270
218627_at	DRAM1	NM_018370	DNA-damage regulated autophagy modulator 1	9.78044	8.75611	2.8794	2.03402	0.003622	0.104277	up	coding	271
209359_x_at	LOC100506403	NM_001001890	uncharacterized LOC100506403	5.58856	5.23244	2.87781	1.27998	0.003637	0.104277	up	coding	272
210423_s_at	SLC11A1	NM_000578	solute carrier family 11 (proton-coupled divalent metal ion transporters), member 1	12.3368	11.593	2.87621	1.67458	0.00365	0.104277	up	coding	273
39402_at	IL1B	NM_000576	interleukin 1, beta	11.5172	10.332	2.87467	2.27396	0.003665	0.104277	up	coding	274
39650_s_at	PCNXL2	NM_014801	pecanex-like 2 (Drosophila)	8.28725	8.94436	-2.8746	-1.57691	0.003666	0.092563	down	coding	275
212737_at	GM2A	NM_000405	GM2 ganglioside activator	12.0232	11.3949	2.87117	1.5458	0.003703	0.104277	up	coding	276
201061_s_at	STOM	NM_001270526	stomatin	12.0766	11.5687	2.86926	1.42202	0.003721	0.104277	up	coding	277
203843_at	RPS6KA3	NM_004586	ribosomal protein S6 kinase, 90kDa, polypeptide 3	9.80103	9.52219	2.86924	1.21322	0.003722	0.104277	up	coding	278
219669_at	CD177	NM_020406	CD177 molecule	9.56518	5.94423	2.8677	12.3031	0.003737	0.104277	up	coding	279
218328_at	COQ4	NM_016035	coenzyme Q4 homolog (S. cerevisiae)	9.67388	10.1742	-2.86448	-1.41453	0.003769	0.092563	down	coding	280
210233_at	IL1RAP	NM_001167928	interleukin 1 receptor accessory protein	5.95694	4.97855	2.86433	1.97026	0.003771	0.104277	up	coding	281
201669_s_at	MARCKS	NM_002356	myristoylated alanine-rich protein kinase C substrate	11.7891	11.2798	2.86331	1.42338	0.003786	0.104277	up	coding	282
217804_s_at	ILF3	NM_001137673	interleukin enhancer binding factor 3, 90kDa	9.90146	10.4251	-2.86209	-1.43754	0.003799	0.092563	down	coding	283
208536_s_at	BCL2L11	NM_001204106	BCL2-like 11 (apoptosis facilitator)	6.53869	5.84284	2.86037	1.61983	0.003816	0.104277	up	coding	284
202054_s_at	ALDH3A2	NM_000382	aldehyde dehydrogenase 3 family, member A2	9.15519	9.51449	-2.85805	-1.2828	0.003841	0.092563	down	coding	285
203802_x_at	NSUN5	NM_001168347	NOP2/Sun domain family, member 5	10.0494	10.4328	-2.85781	-1.3044	0.003843	0.092563	down	coding	286
214341_at	AP1G2	NM_003917	adaptor-related protein complex 1, gamma 2 subunit	9.27905	9.64978	-2.85748	-1.29301	0.003846	0.092563	down	coding	287
206487_at	SUN1	NM_001130965	Sad1 and UNC84 domain containing 1	7.3956	8.01074	-2.85672	-1.5317	0.003854	0.092563	down	coding	288
210449_x_at	MAPK14	NM_001315	mitogen-activated protein kinase 14	10.7969	9.74052	2.85657	2.07964	0.003856	0.104277	up	coding	289
221803_s_at	NRBF2	NM_030759	nuclear receptor binding factor 2	10.524	9.79332	2.85635	1.65946	0.003858	0.104277	up	coding	290
217209_at	CEACAM3	NM_001277163	carcinoembryonic antigen-related cell adhesion molecule 3	7.89374	6.64825	2.85602	2.37099	0.003861	0.104277	up	coding	291
220143_x_at	LUC7L	NM_018032	LUC7-like (S. cerevisiae)	10.6057	11.0567	-2.85596	-1.36698	0.003861	0.092563	down	coding	292
220719_at	OTTHUMG00000168848	---	NULL	5.74819	6.2917	-2.85463	-1.45751	0.003874	0.092563	down	coding	293
217588_at	CATSPER2	NM_054020	cation channel, sperm associated 2	7.71013	8.23349	-2.85459	-1.4373	0.003875	0.092563	down	coding	294
208488_s_at	CR1	NM_000573	complement component (3b/4b) receptor 1 (Knops blood group)	8.32364	7.01809	2.85361	2.47177	0.003885	0.104277	up	coding	295
205322_s_at	MTF1	NM_005955	metal-regulatory transcription factor 1	10.1931	9.53228	2.84934	1.58098	0.003927	0.104277	up	coding	296
203574_at	NFIL3	NM_005384	nuclear factor, interleukin 3 regulated	11.5036	10.7198	2.84853	1.72161	0.003938	0.104277	up	coding	297
213927_at	MAP3K9	NM_033141	mitogen-activated protein kinase kinase kinase 9	5.9566	6.51679	-2.847	-1.47446	0.003953	0.092563	down	coding	298
204361_s_at	SKAP2	NM_003930	src kinase associated phosphoprotein 2	9.68672	8.92706	2.84265	1.69309	0.003995	0.104277	up	coding	299
201963_at	ACSL1	NM_001995	acyl-CoA synthetase long-chain family member 1	12.2783	11.4684	2.84181	1.75306	0.004004	0.104277	up	coding	300
216841_s_at	LOC100129518	NM_000636	uncharacterized LOC100129518	12.157	11.4415	2.8397	1.64203	0.004024	0.104277	up	coding	301
201314_at	STK25	NM_001271977	serine/threonine kinase 25	8.73486	9.09513	-2.83859	-1.28366	0.004036	0.092563	down	coding	302
202199_s_at	SRPK1	NM_003137	SRSF protein kinase 1	8.88149	7.79354	2.83801	2.12571	0.004044	0.104277	up	coding	303
209101_at	CTGF	NM_001901	connective tissue growth factor	5.24778	5.90066	-2.83731	-1.5723	0.00405	0.092563	down	coding	304
213131_at	OLFM1	NM_006334	olfactomedin 1	5.10499	6.41095	-2.83514	-2.47249	0.004077	0.092563	down	coding	305
209882_at	RIT1	NM_001256820	Ras-like without CAAX 1	9.47323	8.65674	2.83419	1.76112	0.004089	0.104277	up	coding	306
218014_at	NUP85	NM_024844	nucleoporin 85kDa	10.3622	10.7675	-2.83325	-1.32433	0.0041	0.092563	down	coding	307
202176_at	ERCC3	NM_000122	excision repair cross-complementing rodent repair deficiency, complementation group 3	10.0361	10.389	-2.82837	-1.27713	0.004156	0.092563	down	coding	308
210818_s_at	BACH1	NM_001011545	BTB and CNC homology 1, basic leucine zipper transcription factor 1	6.1756	5.51215	2.82729	1.58387	0.004168	0.104277	up	coding	309
212808_at	NFATC2IP	NM_032815	nuclear factor of activated T-cells, cytoplasmic, calcineurin-dependent 2 interacting protein	9.37642	9.91093	-2.82643	-1.44844	0.004178	0.092563	down	coding	310
205015_s_at	TGFA	NM_001099691	transforming growth factor, alpha	6.98811	5.99824	2.82609	1.986	0.004182	0.104277	up	coding	311
213628_at	CLCC1	NM_001048210	chloride channel CLIC-like 1	9.85295	10.2413	-2.82496	-1.30891	0.004195	0.092563	down	coding	312
210176_at	TLR1	NM_003263	toll-like receptor 1	12.0784	11.431	2.82473	1.56642	0.004198	0.104277	up	coding	313
213398_s_at	SDR39U1	NM_020195	short chain dehydrogenase/reductase family 39U, member 1	9.97691	10.2987	-2.82446	-1.24986	0.004201	0.092563	down	coding	314
208095_s_at	SRP72	NM_001267722	signal recognition particle 72kDa	10.6851	11.0769	-2.82239	-1.31201	0.004225	0.092563	down	coding	315
202707_at	UMPS	NM_000373	uridine monophosphate synthetase	5.85255	6.26866	-2.82146	-1.33433	0.004236	0.092563	down	coding	316
207781_s_at	ZNF711	NM_021998	zinc finger protein 711	5.23579	5.98302	-2.81802	-1.67857	0.004277	0.092563	down	coding	317
217647_at	---	---	---	8.23763	8.81903	-2.81746	-1.4963	0.004283	0.092563	down	coding	318
203938_s_at	TAF1C	NM_001243156	TATA box binding protein (TBP)-associated factor, RNA polymerase I, C, 110kDa	9.57289	10.0047	-2.81691	-1.34888	0.00429	0.092563	down	coding	319
211612_s_at	IL13RA1	NM_001560	interleukin 13 receptor, alpha 1	10.735	9.94074	2.8168	1.73422	0.004292	0.104277	up	coding	320
218060_s_at	USB1	NM_001195302	U6 snRNA biogenesis 1	11.1919	10.4131	2.81677	1.71569	0.004292	0.104277	up	coding	321
200984_s_at	CD59	NM_000611	CD59 molecule, complement regulatory protein	10.966	9.68689	2.81631	2.42693	0.004298	0.104277	up	coding	322
214866_at	PLAUR	NM_001005376	plasminogen activator, urokinase receptor	10.4038	9.5266	2.8152	1.83679	0.004315	0.104277	up	coding	323
215213_at	NUP54	NM_017426	nucleoporin 54kDa	4.23677	4.83115	-2.81429	-1.50983	0.004324	0.092563	down	coding	324
203170_at	RRP8	NM_015324	ribosomal RNA processing 8, methyltransferase, homolog (yeast)	6.01174	6.64404	-2.81395	-1.55003	0.004328	0.092563	down	coding	325
202193_at	LIMK2	NM_001031801	LIM domain kinase 2	11.7209	10.7222	2.81382	1.99824	0.00433	0.104277	up	coding	326
204377_s_at	VPRBP	NM_001171904	Vpr (HIV-1) binding protein	7.77954	8.44154	-2.81259	-1.58227	0.004344	0.092563	down	coding	327
91617_at	DGCR8	NM_001190326	DGCR8 microprocessor complex subunit	8.92504	9.93864	-2.81182	-2.01894	0.004354	0.092563	down	coding	328
215406_at	---	---	---	6.50788	6.91554	-2.81141	-1.32653	0.004359	0.092563	down	coding	329
219760_at	LIN7B	NM_022165	lin-7 homolog B (C. elegans)	6.45287	6.84013	-2.81064	-1.30791	0.00437	0.092563	down	coding	330
221624_at	TCL6	NM_012468	T-cell leukemia/lymphoma 6 (non-protein coding)	7.07326	7.76467	-2.80914	-1.61486	0.004389	0.092563	down	coding	331
215693_x_at	DDX27	NM_017895	DEAD (Asp-Glu-Ala-Asp) box polypeptide 27	8.67898	9.06766	-2.80755	-1.3092	0.004405	0.092563	down	coding	332
214828_s_at	RRP7A	NM_015703	ribosomal RNA processing 7 homolog A (S. cerevisiae)	7.21674	7.54454	-2.80749	-1.2551	0.004406	0.092563	down	coding	333
214279_s_at	NDRG2	NM_016250	NDRG family member 2	4.50649	4.90328	-2.80689	-1.31658	0.004413	0.092563	down	coding	334
205591_at	OLFM1	NM_006334	olfactomedin 1	5.39512	6.03484	-2.80619	-1.55803	0.004419	0.092563	down	coding	335
204773_at	IL11RA	NM_001142784	interleukin 11 receptor, alpha	8.98551	9.58474	-2.80608	-1.5149	0.004421	0.092563	down	coding	336
213567_at	KPNA4	NM_002268	karyopherin alpha 4 (importin alpha 3)	10.3958	10.1643	2.806	1.17406	0.004422	0.104277	up	coding	337
210980_s_at	ASAH1	NM_001127505	N-acylsphingosine amidohydrolase (acid ceramidase) 1	11.4352	11.0843	2.80547	1.27541	0.004428	0.104277	up	coding	338
203502_at	BPGM	NM_001724	2,3-bisphosphoglycerate mutase	9.30591	8.63159	2.80435	1.59584	0.004444	0.104277	up	coding	339
205687_at	UBFD1	NM_019116	ubiquitin family domain containing 1	8.36995	7.87596	2.80398	1.40833	0.004447	0.104277	up	coding	340
212554_at	CAP2	NM_006366	CAP, adenylate cyclase-associated protein, 2 (yeast)	3.23959	3.64101	-2.80368	-1.32081	0.004453	0.092563	down	coding	341
213993_at	SPON1	NM_006108	spondin 1, extracellular matrix protein	6.68678	7.5493	-2.80359	-1.81821	0.004454	0.092563	down	coding	342
212862_at	CDS2	NM_003818	CDP-diacylglycerol synthase (phosphatidate cytidylyltransferase) 2	9.87575	9.13175	2.80353	1.67481	0.004456	0.104277	up	coding	343
206688_s_at	CPSF4	NM_001081559	cleavage and polyadenylation specific factor 4, 30kDa	9.87097	10.16	-2.8024	-1.22178	0.004468	0.092563	down	coding	344
203073_at	COG2	NM_001145036	component of oligomeric golgi complex 2	9.68636	10.094	-2.80216	-1.32647	0.004471	0.092563	down	coding	345
219568_x_at	SOX18	NM_018419	SRY (sex determining region Y)-box 18	5.12535	4.87659	2.80036	1.18819	0.004495	0.104277	up	coding	346
203423_at	RBP1	NM_001130992	retinol binding protein 1, cellular	5.08411	4.75608	2.8001	1.25529	0.004498	0.104277	up	coding	347
220184_at	NANOG	NM_024865	Nanog homeobox	6.18717	6.87168	-2.79922	-1.60716	0.004509	0.092563	down	coding	348
220410_s_at	CAMSAP1	NM_015447	calmodulin regulated spectrin-associated protein 1	6.97633	7.5895	-2.79784	-1.52962	0.004527	0.092563	down	coding	349
220597_s_at	ARL6IP4	NM_001002251	ADP-ribosylation-like factor 6 interacting protein 4	11.238	11.4944	-2.79763	-1.19447	0.004529	0.092563	down	coding	350
209512_at	HSDL2	NM_001195822	hydroxysteroid dehydrogenase like 2	8.32541	7.68187	2.79637	1.56215	0.004545	0.104277	up	coding	351
200983_x_at	CD59	NM_000611	CD59 molecule, complement regulatory protein	11.2751	9.96149	2.79558	2.48564	0.004553	0.104277	up	coding	352
214952_at	NCAM1	NM_000615	neural cell adhesion molecule 1	4.99192	4.72268	2.79497	1.20517	0.004561	0.104277	up	coding	353
219007_at	NUP43	NM_024647	nucleoporin 43kDa	10.1612	10.5551	-2.79493	-1.31394	0.004562	0.092563	down	coding	354
210743_s_at	CDC14A	NM_003672	cell division cycle 14A	8.68676	9.17813	-2.79369	-1.40578	0.004576	0.092563	down	coding	355
208972_s_at	ATP5G1	NM_001002027	ATP synthase, H+ transporting, mitochondrial Fo complex, subunit C1 (subunit 9)	11.517	11.8211	-2.7923	-1.2346	0.004596	0.092563	down	coding	356
221667_s_at	HSPB8	NM_014365	heat shock 22kDa protein 8	3.3121	3.11911	2.79203	1.14313	0.0046	0.104277	up	coding	357
218354_at	TRAPPC2L	NM_016209	trafficking protein particle complex 2-like	10.1893	10.5722	-2.79125	-1.30393	0.00461	0.092563	down	coding	358
203036_s_at	MTSS1	NM_014751	metastasis suppressor 1	7.80478	8.39267	-2.79051	-1.50305	0.00462	0.092563	down	coding	359
202643_s_at	TNFAIP3	NM_001270507	tumor necrosis factor, alpha-induced protein 3	9.04301	8.52749	2.7892	1.42951	0.004637	0.104277	up	coding	360
211275_s_at	GYG1	NM_001184720	glycogenin 1	12.3607	11.68	2.78854	1.60299	0.004646	0.104277	up	coding	361
201772_at	AZIN1	NM_015878	antizyme inhibitor 1	9.24957	8.86972	2.78811	1.30121	0.00465	0.104277	up	coding	362
204554_at	PPP1R3D	NM_006242	protein phosphatase 1, regulatory subunit 3D	10.3735	9.61483	2.7878	1.69192	0.004654	0.104277	up	coding	363
221385_s_at	FFAR3	NM_005304	free fatty acid receptor 3	6.45175	5.78234	2.78774	1.59043	0.004655	0.104277	up	coding	364
206244_at	CR1	NM_000573	complement component (3b/4b) receptor 1 (Knops blood group)	8.041	6.95507	2.78663	2.12274	0.004672	0.104277	up	coding	365
214238_at	AC012065.7	---	NULL	7.00551	7.54828	-2.78639	-1.45677	0.004675	0.092563	down	coding	366
212014_x_at	CD44	NM_000610	CD44 molecule (Indian blood group)	11.9951	11.5403	2.78619	1.37055	0.004677	0.104277	up	coding	367
214889_at	FAM149A	NM_001006655	family with sequence similarity 149, member A	4.84961	5.35313	-2.78252	-1.41767	0.004724	0.092563	down	coding	368
222286_at	SNAPC3	NM_001039697	small nuclear RNA activating complex, polypeptide 3, 50kDa	8.89136	9.23396	-2.7824	-1.26804	0.004726	0.092563	down	coding	369
203178_at	GATM	NM_001482	glycine amidinotransferase (L-arginine:glycine amidinotransferase)	5.54364	6.51513	-2.78211	-1.96086	0.004729	0.092563	down	coding	370
203417_at	MFAP2	NM_001135247	microfibrillar-associated protein 2	4.04074	3.74886	2.78048	1.22423	0.004751	0.104277	up	coding	371
205026_at	STAT5B	NM_012448	signal transducer and activator of transcription 5B	9.34763	8.50378	2.77975	1.79483	0.004759	0.104277	up	coding	372
219403_s_at	HPSE	NM_001098540	heparanase	10.3409	9.34954	2.77971	1.98806	0.00476	0.104277	up	coding	373
43427_at	ACACB	NM_001093	acetyl-CoA carboxylase beta	9.42041	10.2437	-2.77919	-1.76947	0.004766	0.092563	down	coding	374
207674_at	FCAR	NM_002000	Fc fragment of IgA, receptor for	7.43996	6.10951	2.77836	2.51481	0.004778	0.104277	up	coding	375
202422_s_at	ACSL4	NM_004458	acyl-CoA synthetase long-chain family member 4	10.1384	9.16443	2.77826	1.96422	0.004778	0.104277	up	coding	376
203686_at	MPG	NM_001015052	N-methylpurine-DNA glycosylase	9.37463	9.55451	-2.77799	-1.13279	0.004782	0.092563	down	coding	377
202699_s_at	TMEM63A	NM_014698	transmembrane protein 63A	9.27786	9.70135	-2.77726	-1.34117	0.004791	0.092563	down	coding	378
220572_at	LOC100506282	NM_018705	uncharacterized LOC100506282	7.91769	8.34346	-2.77617	-1.34329	0.004808	0.092563	down	coding	379
201749_at	ECE1	NM_001113347	endothelin converting enzyme 1	8.72867	8.10483	2.77506	1.54096	0.004824	0.104277	up	coding	380
213649_at	SRSF7	NM_001031684	serine/arginine-rich splicing factor 7	10.0783	10.5132	-2.77488	-1.35187	0.004825	0.092563	down	coding	381
214119_s_at	FKBP1A	NM_000801	FK506 binding protein 1A, 12kDa	9.94393	9.36582	2.77476	1.49289	0.004826	0.104277	up	coding	382
208764_s_at	ATP5G2	NM_001002031	ATP synthase, H+ transporting, mitochondrial Fo complex, subunit C2 (subunit 9)	11.2624	11.4898	-2.77416	-1.17071	0.004833	0.092563	down	coding	383
215339_at	NKTR	NM_001012651	natural killer-tumor recognition sequence	7.12279	7.61907	-2.77282	-1.41057	0.00485	0.092563	down	coding	384
201601_x_at	IFITM1	NM_003641	interferon induced transmembrane protein 1	13.6553	13.2713	2.77235	1.30496	0.004857	0.104277	up	coding	385
218650_at	DGCR8	NM_001190326	DGCR8 microprocessor complex subunit	8.46922	9.47109	-2.77215	-2.0026	0.00486	0.092563	down	coding	386
208493_at	HOXA11	NM_005523	homeobox A11	5.15717	4.8992	2.77104	1.19579	0.004876	0.104277	up	coding	387
218880_at	FOSL2	NM_005253	FOS-like antigen 2	9.80838	8.91655	2.76953	1.85553	0.004896	0.104277	up	coding	388
216305_s_at	GCFC2	NM_001201334	GC-rich sequence DNA-binding factor 2	8.04194	8.772	-2.76951	-1.65871	0.004896	0.092563	down	coding	389
205931_s_at	CREB5	NM_001011666	cAMP responsive element binding protein 5	10.9101	9.95665	2.76847	1.93645	0.004907	0.104277	up	coding	390
201888_s_at	IL13RA1	NM_001560	interleukin 13 receptor, alpha 1	9.96959	9.20299	2.76583	1.70125	0.004947	0.104277	up	coding	391
205756_s_at	F8	NM_000132	coagulation factor VIII, procoagulant component	6.98616	6.14138	2.76517	1.79599	0.004955	0.104277	up	coding	392
219908_at	DKK2	NM_014421	dickkopf WNT signaling pathway inhibitor 2	3.18331	3.57507	-2.76506	-1.31199	0.004956	0.092563	down	coding	393
202391_at	BASP1	NM_001271606	brain abundant, membrane attached signal protein 1	13.719	13.2776	2.76425	1.35786	0.004967	0.104277	up	coding	394
220756_s_at	SLC52A1	NM_001104577	solute carrier family 52, riboflavin transporter, member 1	5.91374	5.64595	2.76264	1.20396	0.004988	0.104277	up	coding	395
212934_at	UBXN2B	NM_001077619	UBX domain protein 2B	11.6235	11.0531	2.76239	1.48493	0.00499	0.104277	up	coding	396
206483_at	LRRC6	NM_012472	leucine rich repeat containing 6	9.49493	8.46142	2.76175	2.04699	0.004998	0.104277	up	coding	397
210182_at	CORT	NM_001302	cortistatin	5.76676	6.07243	-2.76126	-1.236	0.005006	0.092563	down	coding	398
206359_at	SOCS3	NM_003955	suppressor of cytokine signaling 3	8.52525	7.18601	2.76098	2.53018	0.00501	0.104277	up	coding	399
54037_at	HPS4	NM_022081	Hermansky-Pudlak syndrome 4	8.78382	9.23845	-2.75921	-1.37043	0.005035	0.092563	down	coding	400
214192_at	NUP88	NM_002532	nucleoporin 88kDa	7.71671	8.18938	-2.75875	-1.38767	0.005042	0.092563	down	coding	401
202974_at	MPP1	NM_001166460	membrane protein, palmitoylated 1, 55kDa	12.2204	11.7279	2.7584	1.40687	0.005047	0.104277	up	coding	402
201230_s_at	ARIH2	NM_006321	ariadne homolog 2 (Drosophila)	9.78823	10.1791	-2.75818	-1.3112	0.00505	0.092563	down	coding	403
36711_at	MAFF	NM_001161572	v-maf musculoaponeurotic fibrosarcoma oncogene homolog F (avian)	9.24684	8.58225	2.75799	1.58512	0.005052	0.104277	up	coding	404
221536_s_at	LSG1	NM_018385	large subunit GTPase 1 homolog (S. cerevisiae)	9.55521	10.0918	-2.75762	-1.45051	0.005057	0.092563	down	coding	405
220341_s_at	C5orf45	NM_001017987	chromosome 5 open reading frame 45	9.6365	10.0752	-2.75762	-1.35538	0.005057	0.092563	down	coding	406
49452_at	ACACB	NM_001093	acetyl-CoA carboxylase beta	9.59257	10.427	-2.75759	-1.78312	0.005058	0.092563	down	coding	407
210599_at	ZNF614	NM_025040	zinc finger protein 614	6.08643	6.50452	-2.75748	-1.33616	0.005059	0.092563	down	coding	408
204578_at	PPIP5K1	NM_001024463	diphosphoinositol pentakisphosphate kinase 1	7.89645	8.41917	-2.75718	-1.43666	0.005063	0.092563	down	coding	409
209930_s_at	NFE2	NM_001136023	nuclear factor (erythroid-derived 2), 45kDa	12.3034	11.6311	2.75561	1.59364	0.005088	0.104277	up	coding	410
215647_at	---	---	---	5.04362	5.63455	-2.75563	-1.50622	0.005088	0.092563	down	coding	411
210240_s_at	CDKN2D	NM_001800	cyclin-dependent kinase inhibitor 2D (p19, inhibits CDK4)	8.82907	8.26342	2.75544	1.48005	0.005091	0.104277	up	coding	412
207384_at	PGLYRP1	NM_005091	peptidoglycan recognition protein 1	9.5247	8.37682	2.75447	2.21589	0.005105	0.104277	up	coding	413
213772_s_at	GGA2	NM_015044	golgi-associated, gamma adaptin ear containing, ARF binding protein 2	10.5477	10.9472	-2.75305	-1.31909	0.005125	0.092563	down	coding	414
205067_at	IL1B	NM_000576	interleukin 1, beta	11.6849	10.5091	2.75275	2.25929	0.005131	0.104277	up	coding	415
210073_at	ST8SIA1	NM_003034	ST8 alpha-N-acetyl-neuraminide alpha-2,8-sialyltransferase 1	5.91377	6.72208	-2.75127	-1.75116	0.005147	0.092563	down	coding	416
202652_at	APBB1	NM_001164	amyloid beta (A4) precursor protein-binding, family B, member 1 (Fe65)	7.00199	7.57133	-2.75124	-1.48385	0.005148	0.092563	down	coding	417
208269_s_at	ADAM28	NM_014265	ADAM metallopeptidase domain 28	7.6204	8.24765	-2.75036	-1.54462	0.00516	0.092563	down	coding	418
204166_at	SBNO2	NM_001100122	strawberry notch homolog 2 (Drosophila)	8.49571	7.56306	2.7498	1.90879	0.00517	0.104277	up	coding	419
215844_at	TNPO2	NM_001136195	transportin 2	6.75289	7.10834	-2.74668	-1.27939	0.005215	0.092563	down	coding	420
212314_at	SEL1L3	NM_015187	sel-1 suppressor of lin-12-like 3 (C. elegans)	10.7649	11.2701	-2.74627	-1.41934	0.005221	0.092563	down	coding	421
203471_s_at	PLEK	NM_002664	pleckstrin	12.1468	11.7305	2.74468	1.33453	0.005246	0.104277	up	coding	422
211986_at	AHNAK	NM_001620	AHNAK nucleoprotein	11.6994	12.0284	-2.74224	-1.2562	0.005282	0.092563	down	coding	423
202057_at	KPNA1	NM_002264	karyopherin alpha 1 (importin alpha 5)	10.6625	10.9556	-2.74127	-1.22528	0.005296	0.092563	down	coding	424
208748_s_at	FLOT1	NM_005803	flotillin 1	8.56726	7.87156	2.74083	1.61967	0.005303	0.104277	up	coding	425
208725_at	EIF2S2	NM_003908	eukaryotic translation initiation factor 2, subunit 2 beta, 38kDa	8.35966	8.62001	-2.74022	-1.19776	0.005311	0.092563	down	coding	426
211521_s_at	CYTH4	NM_013385	cytohesin 4	7.98135	7.3977	2.73982	1.49864	0.005317	0.104277	up	coding	427
204216_s_at	ZC3H14	NM_001160103	zinc finger CCCH-type containing 14	8.56049	8.94408	-2.73915	-1.30459	0.005329	0.092563	down	coding	428
211884_s_at	CIITA	NM_000246	class II, major histocompatibility complex, transactivator	4.92915	4.62736	2.73883	1.23267	0.005335	0.104277	up	coding	429
208948_s_at	STAU1	NM_001037328	staufen double-stranded RNA binding protein 1	11.8737	11.7326	2.73885	1.1027	0.005335	0.104277	up	coding	430
202967_at	GSTA4	NM_001512	glutathione S-transferase alpha 4	6.2554	6.95813	-2.73817	-1.62757	0.005344	0.092563	down	coding	431
212884_x_at	APOE	NM_000041	apolipoprotein E	6.82166	6.55922	2.73754	1.1995	0.005354	0.104277	up	coding	432
209171_at	ITPA	NM_001267623	inosine triphosphatase (nucleoside triphosphate pyrophosphatase)	10.2223	10.5774	-2.73731	-1.27903	0.005358	0.092563	down	coding	433
215155_at	HEXA	NM_000520	hexosaminidase A (alpha polypeptide)	8.72941	9.1654	-2.73659	-1.35284	0.005371	0.092563	down	coding	434
202016_at	MEST	NM_001253900	mesoderm specific transcript	7.37212	8.03215	-2.73623	-1.58012	0.005375	0.092563	down	coding	435
218402_s_at	HPS4	NM_022081	Hermansky-Pudlak syndrome 4	9.33042	9.7693	-2.73501	-1.35555	0.005393	0.092563	down	coding	436
221929_at	RBM12B-AS2	---	RBM12B antisense RNA 2	5.81725	5.46912	2.73453	1.27291	0.005401	0.104277	up	coding	437
218983_at	C1RL	NM_016546	complement component 1, r subcomponent-like	10.5391	9.89647	2.73294	1.56118	0.005421	0.104277	up	coding	438
58367_s_at	ZNF419	NM_001098491	zinc finger protein 419	9.21763	9.74115	-2.73294	-1.43746	0.005421	0.092563	down	coding	439
212390_at	LOC100996724	NM_001002810	myomegalin-like	7.14717	7.73398	-2.7329	-1.50192	0.005422	0.092563	down	coding	440
203504_s_at	ABCA1	NM_005502	ATP-binding cassette, sub-family A (ABC1), member 1	8.50005	7.43962	2.73281	2.08555	0.005423	0.104277	up	coding	441
212268_at	SERPINB1	NM_030666	serpin peptidase inhibitor, clade B (ovalbumin), member 1	11.7613	11.0037	2.73263	1.69063	0.005427	0.104277	up	coding	442
211930_at	HNRNPA3	NM_194247	heterogeneous nuclear ribonucleoprotein A3	10.4563	10.7774	-2.7325	-1.2493	0.005431	0.092563	down	coding	443
208992_s_at	STAT3	NM_003150	signal transducer and activator of transcription 3 (acute-phase response factor)	10.4213	9.72944	2.73065	1.61537	0.005458	0.104277	up	coding	444
208072_s_at	DGKD	NM_003648	diacylglycerol kinase, delta 130kDa	10.7212	11.0665	-2.73064	-1.27037	0.005459	0.092563	down	coding	445
215196_at	---	---	---	6.80718	7.39171	-2.72843	-1.49954	0.005491	0.092563	down	coding	446
218113_at	TMEM2	NM_001135820	transmembrane protein 2	10.8596	10.5422	2.72707	1.24611	0.005512	0.104277	up	coding	447
218099_at	TEX2	NM_018469	testis expressed 2	8.28855	8.69298	-2.72552	-1.32357	0.005534	0.092563	down	coding	448
221185_s_at	IQCG	NM_001134435	IQ motif containing G	6.70963	7.16689	-2.72407	-1.37293	0.005555	0.092563	down	coding	449
212870_at	SOS2	NM_006939	son of sevenless homolog 2 (Drosophila)	10.2246	9.77444	2.7238	1.36621	0.005558	0.104277	up	coding	450
209527_at	EXOSC2	NM_014285	exosome component 2	9.1929	9.77097	-2.7234	-1.49285	0.005563	0.092563	down	coding	451
211583_x_at	NCR3	NM_001145466	natural cytotoxicity triggering receptor 3	9.79292	10.2755	-2.72216	-1.39726	0.005576	0.092563	down	coding	452
207498_s_at	CYP2D6	NM_000106	cytochrome P450, family 2, subfamily D, polypeptide 6	6.53469	7.00421	-2.72214	-1.38465	0.005576	0.092563	down	coding	453
213501_at	ACOX1	NM_001185039	acyl-CoA oxidase 1, palmitoyl	9.50526	8.84351	2.72169	1.582	0.005584	0.104277	up	coding	454
207625_s_at	CBFA2T2	NM_001032999	core-binding factor, runt domain, alpha subunit 2; translocated to, 2	10.6277	11.0096	-2.71969	-1.30307	0.005611	0.092563	down	coding	455
222258_s_at	SH3BP4	NM_014521	SH3-domain binding protein 4	6.10832	6.97921	-2.7189	-1.82879	0.005622	0.092563	down	coding	456
209575_at	IL10RB	NM_000628	interleukin 10 receptor, beta	11.4926	10.9603	2.71728	1.44627	0.005643	0.104277	up	coding	457
218838_s_at	TTC31	NM_022492	tetratricopeptide repeat domain 31	9.55987	9.90223	-2.71675	-1.26783	0.005653	0.092563	down	coding	458
214969_at	MAP3K9	NM_033141	mitogen-activated protein kinase kinase kinase 9	5.02156	5.50078	-2.71589	-1.39399	0.005666	0.092563	down	coding	459
203143_s_at	KIAA0040	NM_001162893	KIAA0040	12.1602	11.7439	2.71571	1.33444	0.005669	0.104277	up	coding	460
203708_at	PDE4B	NM_001037339	phosphodiesterase 4B, cAMP-specific	11.2204	10.8446	2.71397	1.29754	0.005692	0.104277	up	coding	461
218300_at	PAGR1	NM_024516	PAXIP1 associated glutamate-rich protein 1	10.2017	10.7132	-2.71387	-1.42553	0.005695	0.092563	down	coding	462
214727_at	BRCA2	NM_000059	breast cancer 2, early onset	4.78349	5.36991	-2.71299	-1.50152	0.005712	0.092563	down	coding	463
209608_s_at	ACAT2	NM_005891	acetyl-CoA acetyltransferase 2	9.42827	9.75295	-2.71216	-1.25239	0.005725	0.092563	down	coding	464
206989_s_at	SCAF11	NM_004719	SR-related CTD-associated factor 11	10.015	9.67727	2.71178	1.2638	0.00573	0.104277	up	coding	465
210309_at	RECQL5	NM_001003715	RecQ protein-like 5	5.77641	6.219	-2.71089	-1.35905	0.005744	0.092563	down	coding	466
214241_at	NDUFB8	NM_005004	NADH dehydrogenase (ubiquinone) 1 beta subcomplex, 8, 19kDa	9.4834	9.98218	-2.71069	-1.41302	0.005749	0.092563	down	coding	467
200729_s_at	ACTR2	NM_001005386	ARP2 actin-related protein 2 homolog (yeast)	11.6144	11.2675	2.71072	1.27183	0.005749	0.104277	up	coding	468
210705_s_at	TRIM5	NM_033034	tripartite motif containing 5	10.0048	9.54271	2.71007	1.37758	0.00576	0.104277	up	coding	469
215156_at	WDR61	NM_025234	WD repeat domain 61	9.16427	9.5844	-2.70878	-1.33805	0.005779	0.092563	down	coding	470
213749_at	MASP1	NM_001031849	mannan-binding lectin serine peptidase 1 (C4/C2 activating component of Ra-reactive factor)	5.89123	5.65975	2.70858	1.17404	0.005783	0.104277	up	coding	471
204780_s_at	FAS	NM_000043	Fas cell surface death receptor	11.0496	9.87252	2.7082	2.26118	0.005786	0.104277	up	coding	472
219446_at	RIC8B	NM_018157	resistance to inhibitors of cholinesterase 8 homolog B (C. elegans)	7.90255	8.33407	-2.70807	-1.34865	0.005789	0.092563	down	coding	473
210324_at	C8G	NM_000606	complement component 8, gamma polypeptide	5.29484	5.0159	2.70793	1.21331	0.005791	0.104277	up	coding	474
216862_s_at	CMC4	NM_001018024	C-x(9)-C motif containing 4 homolog (S. cerevisiae)	10.7082	11.0831	-2.70787	-1.29681	0.005792	0.092563	down	coding	475
206227_at	CILP	NM_003613	cartilage intermediate layer protein, nucleotide pyrophosphohydrolase	5.1576	5.90513	-2.70574	-1.67891	0.005824	0.092563	down	coding	476
203761_at	SLA	NM_001045556	Src-like-adaptor	12.4645	12.067	2.7051	1.31718	0.005835	0.104277	up	coding	477
210410_s_at	MSH5	NM_001039651	mutS homolog 5 (E. coli)	7.61139	7.98722	-2.7033	-1.29759	0.005863	0.092563	down	coding	478
204210_s_at	PCYT1A	NM_005017	phosphate cytidylyltransferase 1, choline, alpha	8.52547	8.03392	2.70285	1.40596	0.005872	0.104277	up	coding	479
220384_at	NME8	NM_016616	NME/NM23 family member 8	9.11776	8.21166	2.70224	1.87396	0.00588	0.104277	up	coding	480
213367_at	LOC155060	NR_015357	AI894139 pseudogene	7.15952	7.68722	-2.70054	-1.44164	0.005907	0.092563	down	coding	481
202663_at	WIPF1	NM_001077269	WAS/WASL interacting protein family, member 1	9.99796	9.58365	2.70033	1.33266	0.005911	0.104277	up	coding	482
208519_x_at	GNRH2	NM_001501	gonadotropin-releasing hormone 2	5.85449	5.54437	2.70022	1.2398	0.005912	0.104277	up	coding	483
202739_s_at	PHKB	NM_000293	phosphorylase kinase, beta	8.35683	8.59233	-2.70007	-1.17732	0.005914	0.092563	down	coding	484
217572_at	---	---	---	5.99334	5.70555	2.6996	1.22077	0.005922	0.104277	up	coding	485
219811_at	DGCR8	NM_001190326	DGCR8 microprocessor complex subunit	7.5099	7.93683	-2.69952	-1.34437	0.005924	0.092563	down	coding	486
217967_s_at	FAM129A	NM_052966	family with sequence similarity 129, member A	13.2078	12.6603	2.699	1.46155	0.005932	0.104277	up	coding	487
205599_at	TRAF1	NM_001190945	TNF receptor-associated factor 1	8.87868	9.42279	-2.69861	-1.45812	0.00594	0.092563	down	coding	488
212274_at	LPIN1	NM_001261427	lipin 1	10.8883	11.3192	-2.69847	-1.34805	0.005944	0.092563	down	coding	489
216002_at	---	---	---	6.1659	6.70599	-2.69827	-1.45407	0.005947	0.092563	down	coding	490
217156_at	HADHAP1	---	hydroxyacyl-CoA dehydrogenase/3-ketoacyl-CoA thiolase/enoyl-CoA hydratase (trifunctional protein), alpha subunit pseudogene 1	6.18409	5.95293	2.69721	1.17378	0.005966	0.104277	up	coding	491
220832_at	TLR8	NM_016610	toll-like receptor 8	10.6721	9.63451	2.69699	2.05283	0.005971	0.104277	up	coding	492
202525_at	PRSS8	NM_002773	protease, serine, 8	4.19895	3.88265	2.69673	1.24514	0.005974	0.104277	up	coding	493
203973_s_at	CEBPD	NM_005195	CCAAT/enhancer binding protein (C/EBP), delta	12.1121	11.4785	2.69655	1.55143	0.005977	0.104277	up	coding	494
212841_s_at	PPFIBP2	NM_001256568	PTPRF interacting protein, binding protein 2 (liprin beta 2)	8.24415	8.68302	-2.69489	-1.35554	0.006003	0.092563	down	coding	495
209835_x_at	CD44	NM_000610	CD44 molecule (Indian blood group)	12.0129	11.5887	2.69484	1.34182	0.006004	0.104277	up	coding	496
214016_s_at	LOC100996496	NM_005066	uncharacterized LOC100996496	12.4061	12.7125	-2.69375	-1.23664	0.006023	0.092563	down	coding	497
212315_s_at	NUP210	NM_024923	nucleoporin 210kDa	10.1159	10.5693	-2.6935	-1.36927	0.006027	0.092563	down	coding	498
218279_s_at	---	---	---	12.1477	11.3005	2.69331	1.799	0.00603	0.104277	up	coding	499
219637_at	ARMC9	NM_001271466	armadillo repeat containing 9	3.86576	4.23305	-2.69299	-1.28992	0.006035	0.092563	down	coding	500
219815_at	GAL3ST4	NM_024637	galactose-3-O-sulfotransferase 4	8.95406	9.78134	-2.69283	-1.77433	0.006036	0.092563	down	coding	501
211188_at	CD84	NM_001184879	CD84 molecule	4.13533	4.74768	-2.69231	-1.52875	0.006046	0.092563	down	coding	502
207704_s_at	GAS7	NM_001130831	growth arrest-specific 7	9.65197	8.42308	2.69195	2.34387	0.006053	0.104277	up	coding	503
91952_at	DCAF15	NM_138353	DDB1 and CUL4 associated factor 15	9.07398	9.43968	-2.6918	-1.28851	0.006055	0.092563	down	coding	504
215667_x_at	LOC100132832	NM_001129851	PMS2 postmeiotic segregation increased 2 (S. cerevisiae) pseudogene	9.46503	9.8572	-2.69131	-1.31237	0.006061	0.092563	down	coding	505
216571_at	---	---	---	5.53685	5.32955	2.69054	1.15452	0.006073	0.104277	up	coding	506
205922_at	VNN2	NM_001242350	vanin 2	13.1809	12.6978	2.69006	1.39778	0.006082	0.104277	up	coding	507
217088_s_at	NCR1	NM_001145457	natural cytotoxicity triggering receptor 1	5.91525	5.62145	2.68938	1.22586	0.006095	0.104277	up	coding	508
221849_s_at	DCAF15	NM_138353	DDB1 and CUL4 associated factor 15	8.80662	9.13096	-2.68671	-1.2521	0.006147	0.092563	down	coding	509
216360_x_at	RRP12	NM_001145114	ribosomal RNA processing 12 homolog (S. cerevisiae)	4.96726	4.64592	2.68629	1.24949	0.006156	0.104277	up	coding	510
209310_s_at	CASP4	NM_001225	caspase 4, apoptosis-related cysteine peptidase	12.6931	12.1701	2.68603	1.43695	0.006161	0.104277	up	coding	511
211299_s_at	FLOT2	NM_004475	flotillin 2	9.80046	8.95496	2.68539	1.79689	0.006172	0.104277	up	coding	512
215670_s_at	SCAND2P	NM_022050	SCAN domain containing 2 pseudogene	7.45091	7.95672	-2.68492	-1.41992	0.006181	0.092563	down	coding	513
216808_at	MIR622	NR_030754	microRNA 622	5.1314	4.86451	2.68423	1.20321	0.006194	0.104277	up	coding	514
203907_s_at	IQSEC1	NM_001134382	IQ motif and Sec7 domain 1	11.9049	11.6081	2.68316	1.22844	0.006215	0.104277	up	coding	515
217072_at	CD300A	NM_001256841	CD300a molecule	9.59588	8.89487	2.6826	1.62564	0.006228	0.104277	up	coding	516
204930_s_at	BNIP1	NM_001205	BCL2/adenovirus E1B 19kDa interacting protein 1	7.76874	8.21901	-2.68193	-1.3663	0.006238	0.092563	down	coding	517
208915_s_at	GGA2	NM_015044	golgi-associated, gamma adaptin ear containing, ARF binding protein 2	7.81657	8.19432	-2.6814	-1.29932	0.006247	0.092563	down	coding	518
202785_at	NDUFA7	NM_005001	NADH dehydrogenase (ubiquinone) 1 alpha subcomplex, 7, 14.5kDa	9.74434	9.98346	-2.68132	-1.18027	0.006247	0.092563	down	coding	519
215236_s_at	PICALM	NM_001008660	phosphatidylinositol binding clathrin assembly protein	8.60961	7.93213	2.681	1.59934	0.006252	0.104277	up	coding	520
213688_at	CALM1	NM_001166106	calmodulin 1 (phosphorylase kinase, delta)	8.36462	8.79652	-2.68039	-1.34902	0.006264	0.092563	down	coding	521
216904_at	COL6A1	NM_001848	collagen, type VI, alpha 1	4.94669	4.70482	2.68034	1.18252	0.006265	0.104277	up	coding	522
218623_at	HMP19	NM_015980	HMP19 protein	4.42615	3.51052	2.68014	1.88639	0.00627	0.104277	up	coding	523
204231_s_at	FAAH	NM_001441	fatty acid amide hydrolase	7.10436	7.48902	-2.67931	-1.30555	0.006281	0.092563	down	coding	524
213773_x_at	NSUN5	NM_001168347	NOP2/Sun domain family, member 5	11.0604	11.4423	-2.67905	-1.30304	0.006286	0.092563	down	coding	525
217485_x_at	PMS2P1	NM_005394	postmeiotic segregation increased 2 pseudogene 1	9.50478	9.85092	-2.67875	-1.27116	0.006291	0.092563	down	coding	526
217527_s_at	NFATC2IP	NM_032815	nuclear factor of activated T-cells, cytoplasmic, calcineurin-dependent 2 interacting protein	10.8295	11.2773	-2.67843	-1.3639	0.006297	0.092563	down	coding	527
215743_at	NMT2	NM_004808	N-myristoyltransferase 2	7.38832	8.05105	-2.67744	-1.58308	0.006315	0.092563	down	coding	528
209440_at	PRPS1	NM_001204402	phosphoribosyl pyrophosphate synthetase 1	8.86255	9.33081	-2.67736	-1.38343	0.006317	0.092563	down	coding	529
204781_s_at	FAS	NM_000043	Fas cell surface death receptor	10.1901	9.20781	2.67684	1.97554	0.006325	0.104277	up	coding	530
207330_at	PZP	NM_002864	pregnancy-zone protein	5.44956	6.21127	-2.67585	-1.69551	0.006344	0.092563	down	coding	531
204297_at	PIK3C3	NM_002647	phosphatidylinositol 3-kinase, catalytic subunit type 3	10.3086	10.0536	2.6758	1.19327	0.006345	0.104277	up	coding	532
217494_s_at	PTENP1	NR_023917	phosphatase and tensin homolog pseudogene 1	9.824	9.21587	2.67287	1.52428	0.006402	0.104277	up	coding	533
212736_at	C16orf45	NM_001142469	chromosome 16 open reading frame 45	6.55538	6.91792	-2.67276	-1.28569	0.006404	0.092563	down	coding	534
36888_at	HAUS5	NM_015302	HAUS augmin-like complex, subunit 5	8.80275	9.33847	-2.67169	-1.44967	0.006425	0.092563	down	coding	535
208963_x_at	FADS1	NM_013402	fatty acid desaturase 1	8.23282	8.5471	-2.67085	-1.24339	0.006438	0.092563	down	coding	536
220692_at	---	---	---	7.56547	7.97556	-2.67045	-1.32877	0.006444	0.092563	down	coding	537
218148_at	CENPT	NM_025082	centromere protein T	8.82926	9.25172	-2.67011	-1.34021	0.006449	0.092563	down	coding	538
203412_at	LZTR1	NM_006767	leucine-zipper-like transcription regulator 1	8.94972	9.26021	-2.66975	-1.24013	0.006457	0.092563	down	coding	539
204445_s_at	ALOX5	NM_000698	arachidonate 5-lipoxygenase	8.3927	7.66894	2.66932	1.65149	0.006465	0.104277	up	coding	540
208496_x_at	HIST1H3A	NM_003529	histone cluster 1, H3a	7.04249	6.62892	2.66857	1.33197	0.006477	0.104277	up	coding	541
205411_at	STK4	NM_006282	serine/threonine kinase 4	8.0864	7.57003	2.66832	1.43036	0.006482	0.104277	up	coding	542
202625_at	LYN	NM_001111097	v-yes-1 Yamaguchi sarcoma viral related oncogene homolog	12.775	12.4872	2.66726	1.22073	0.006499	0.104277	up	coding	543
213785_at	IPO9	NM_018085	importin 9	7.42753	7.93433	-2.66642	-1.42089	0.006514	0.092563	down	coding	544
44040_at	FBXO41	NM_001080410	F-box protein 41	10.313	10.8237	-2.66628	-1.42472	0.006517	0.092563	down	coding	545
205713_s_at	COMP	NM_000095	cartilage oligomeric matrix protein	5.04666	4.78642	2.66625	1.19767	0.006518	0.104277	up	coding	546
217312_s_at	COL7A1	NM_000094	collagen, type VII, alpha 1	4.49626	4.23569	2.66568	1.19795	0.006527	0.104277	up	coding	547
214733_s_at	YIPF1	NM_018982	Yip1 domain family, member 1	11.7585	11.3406	2.66559	1.33601	0.006529	0.104277	up	coding	548
202912_at	ADM	NM_001124	adrenomedullin	11.6376	10.5788	2.66526	2.0832	0.006534	0.104277	up	coding	549
214250_at	NUMA1	NM_006185	nuclear mitotic apparatus protein 1	10.3439	10.8757	-2.66257	-1.44571	0.006583	0.092563	down	coding	550
215966_x_at	GK3P	NR_026575	glycerol kinase 3 pseudogene	9.47413	8.02184	2.66243	2.73642	0.006585	0.104277	up	coding	551
210845_s_at	PLAUR	NM_001005376	plasminogen activator, urokinase receptor	11.5591	10.7848	2.66224	1.71033	0.006588	0.104277	up	coding	552
210191_s_at	PHTF1	NM_006608	putative homeodomain transcription factor 1	8.52143	7.55164	2.66212	1.95856	0.00659	0.104277	up	coding	553
207771_at	SLC5A2	NM_003041	solute carrier family 5 (sodium/glucose cotransporter), member 2	7.28909	7.72529	-2.66127	-1.35304	0.006605	0.092563	down	coding	554
203959_s_at	ZBTB40	NM_001083621	zinc finger and BTB domain containing 40	9.70228	10.2376	-2.66024	-1.44921	0.006625	0.092563	down	coding	555
214965_at	SPATA2L	NM_152339	spermatogenesis associated 2-like	10.4004	9.93193	2.66017	1.38364	0.006626	0.104277	up	coding	556
212456_at	CLUH	NM_015229	clustered mitochondria (cluA/CLU1) homolog	7.97509	8.41705	-2.66017	-1.35845	0.006626	0.092563	down	coding	557
214473_x_at	PMS2P3	NM_001003686	postmeiotic segregation increased 2 pseudogene 3	9.02015	9.40238	-2.65994	-1.30335	0.00663	0.092563	down	coding	558
210135_s_at	SHOX2	NM_001163678	short stature homeobox 2	6.36528	4.15172	2.65969	4.63819	0.006634	0.104277	up	coding	559
221658_s_at	IL21R	NM_021798	interleukin 21 receptor	7.73552	8.26541	-2.65967	-1.44382	0.006634	0.092563	down	coding	560
214366_s_at	ALOX5	NM_000698	arachidonate 5-lipoxygenase	9.30288	8.53968	2.65859	1.69725	0.006656	0.104277	up	coding	561
205181_at	ZSCAN9	NM_001199479	zinc finger and SCAN domain containing 9	8.9882	9.46895	-2.6583	-1.39547	0.006659	0.092563	down	coding	562
218023_s_at	FAM53C	NM_001135647	family with sequence similarity 53, member C	11.0904	10.55	2.65768	1.45434	0.006674	0.104277	up	coding	563
201342_at	SNRPC	NM_003093	small nuclear ribonucleoprotein polypeptide C	10.3884	10.6388	-2.65759	-1.1895	0.006676	0.092563	down	coding	564
202446_s_at	PLSCR1	NM_021105	phospholipid scramblase 1	11.4741	10.1841	2.65729	2.44538	0.006683	0.104277	up	coding	565
218548_x_at	TEX264	NM_001129884	testis expressed 264	9.38717	9.66091	-2.65564	-1.20894	0.006711	0.092563	down	coding	566
209776_s_at	SLC19A1	NM_001205206	solute carrier family 19 (folate transporter), member 1	6.60351	6.1761	2.654	1.34481	0.006737	0.104277	up	coding	567
212560_at	SORL1	NM_003105	sortilin-related receptor, L(DLR class) A repeats containing	12.9501	12.6951	2.65307	1.19331	0.006754	0.104277	up	coding	568
210904_s_at	IL13RA1	NM_001560	interleukin 13 receptor, alpha 1	8.56078	7.61354	2.65282	1.92818	0.006757	0.104277	up	coding	569
215151_at	DOCK10	NM_014689	dedicator of cytokinesis 10	7.56396	8.08115	-2.65279	-1.43116	0.006759	0.092563	down	coding	570
208807_s_at	CHD3	NM_001005271	chromodomain helicase DNA binding protein 3	10.5414	10.9654	-2.65267	-1.34164	0.006761	0.092563	down	coding	571
203570_at	LOXL1	NM_005576	lysyl oxidase-like 1	5.48102	4.85592	2.65226	1.54231	0.006768	0.104277	up	coding	572
202638_s_at	ICAM1	NM_000201	intercellular adhesion molecule 1	10.0277	9.07753	2.65166	1.93205	0.00678	0.104277	up	coding	573
213002_at	MARCKS	NM_002356	myristoylated alanine-rich protein kinase C substrate	12.8009	12.5062	2.65067	1.2266	0.006797	0.104277	up	coding	574
202748_at	GBP2	NM_004120	guanylate binding protein 2, interferon-inducible	13.0945	12.6443	2.64967	1.36626	0.006815	0.104277	up	coding	575
211307_s_at	FCAR	NM_002000	Fc fragment of IgA, receptor for	6.43587	5.84488	2.6495	1.50628	0.006818	0.104277	up	coding	576
200889_s_at	SSR1	NM_003144	signal sequence receptor, alpha	10.8521	10.3931	2.64916	1.37456	0.006824	0.104277	up	coding	577
203179_at	GALT	NM_000155	galactose-1-phosphate uridylyltransferase	9.6855	9.99409	-2.64845	-1.23849	0.006839	0.092563	down	coding	578
211816_x_at	FCAR	NM_002000	Fc fragment of IgA, receptor for	7.04703	5.95995	2.64652	2.12444	0.006877	0.104277	up	coding	579
202180_s_at	MVP	NM_005115	major vault protein	10.3891	9.77224	2.64578	1.53358	0.006892	0.104277	up	coding	580
217149_x_at	TNK1	NM_001251902	tyrosine kinase, non-receptor, 1	7.37626	7.87981	-2.64539	-1.4177	0.006901	0.092563	down	coding	581
202516_s_at	DLG1	NM_001098424	discs, large homolog 1 (Drosophila)	6.16735	6.58221	-2.64516	-1.33317	0.006906	0.092563	down	coding	582
212961_x_at	CXorf40B	NM_001013845	chromosome X open reading frame 40B	9.87648	10.131	-2.6437	-1.19294	0.006934	0.092563	down	coding	583
217650_x_at	ST3GAL2	NM_006927	ST3 beta-galactoside alpha-2,3-sialyltransferase 2	11.4459	11.1822	2.64266	1.2005	0.006952	0.104277	up	coding	584
209515_s_at	RAB27A	NM_004580	RAB27A, member RAS oncogene family	11.8689	11.5043	2.64055	1.28747	0.006992	0.104277	up	coding	585
202700_s_at	TMEM63A	NM_014698	transmembrane protein 63A	8.56527	8.9381	-2.6396	-1.29488	0.007007	0.092563	down	coding	586
213112_s_at	SQSTM1	NM_001142298	sequestosome 1	9.39077	9.7348	-2.63948	-1.26929	0.00701	0.092563	down	coding	587
219249_s_at	FKBP10	NM_021939	FK506 binding protein 10, 65 kDa	5.8092	5.59111	2.63896	1.1632	0.00702	0.104277	up	coding	588
213460_x_at	NSUN5P1	NM_001039487	NOP2/Sun domain family, member 5 pseudogene 1	10.4186	10.8673	-2.63851	-1.3648	0.007029	0.092563	down	coding	589
202792_s_at	PPP6R2	NM_001242898	protein phosphatase 6, regulatory subunit 2	11.3273	11.7014	-2.63783	-1.29604	0.007041	0.092563	down	coding	590
213582_at	ATP11A	NM_015205	ATPase, class VI, type 11A	10.3674	9.9635	2.63773	1.32312	0.007043	0.104277	up	coding	591
205112_at	PLCE1	NM_001165979	phospholipase C, epsilon 1	4.48442	5.04893	-2.63651	-1.47889	0.007062	0.092563	down	coding	592
220390_at	AGBL2	NM_024783	ATP/GTP binding protein-like 2	5.57951	6.17679	-2.63584	-1.51286	0.007076	0.092563	down	coding	593
215267_s_at	SLC8A2	NM_015063	solute carrier family 8 (sodium/calcium exchanger), member 2	4.46676	4.22856	2.63545	1.17952	0.007084	0.104277	up	coding	594
208930_s_at	ILF3	NM_001137673	interleukin enhancer binding factor 3, 90kDa	10.2159	10.7001	-2.63521	-1.39877	0.007087	0.092563	down	coding	595
214369_s_at	RASGRP2	NM_001098670	RAS guanyl releasing protein 2 (calcium and DAG-regulated)	11.2101	11.5801	-2.63517	-1.29239	0.007088	0.092563	down	coding	596
220674_at	CD22	NM_001185099	CD22 molecule	6.8465	7.59577	-2.63377	-1.68094	0.007116	0.092563	down	coding	597
218427_at	SDCCAG3	NM_001039707	serologically defined colon cancer antigen 3	8.25818	8.60926	-2.63313	-1.27552	0.007129	0.092563	down	coding	598
220155_s_at	BRD9	NM_001009877	bromodomain containing 9	10.3437	10.71	-2.63273	-1.2891	0.007135	0.092563	down	coding	599
207785_s_at	RBPJ	NM_005349	recombination signal binding protein for immunoglobulin kappa J region	11.9624	11.6074	2.63205	1.27902	0.007145	0.104277	up	coding	600
209339_at	SIAH2	NM_005067	siah E3 ubiquitin protein ligase 2	10.2189	9.75711	2.6306	1.37726	0.007175	0.104277	up	coding	601
211391_s_at	PATZ1	NM_014323	POZ (BTB) and AT hook containing zinc finger 1	5.9873	6.40843	-2.63059	-1.33897	0.007175	0.092563	down	coding	602
205987_at	CD1C	NM_001765	CD1c molecule	9.81057	10.5313	-2.62848	-1.64804	0.007213	0.092563	down	coding	603
203276_at	LMNB1	NM_001198557	lamin B1	10.8261	10.1593	2.62832	1.58748	0.007215	0.104277	up	coding	604
203969_at	PEX3	NM_003630	peroxisomal biogenesis factor 3	6.89152	7.35403	-2.62789	-1.37794	0.007222	0.092563	down	coding	605
222367_at	WHAMMP2	NR_003521	WAS protein homolog associated with actin, golgi membranes and microtubules pseudogene 2	8.18401	8.58583	-2.62755	-1.32117	0.00723	0.092563	down	coding	606
205896_at	SLC22A4	NM_003059	solute carrier family 22 (organic cation/ergothioneine transporter), member 4	11.2757	10.0467	2.6263	2.34401	0.007257	0.104277	up	coding	607
214056_at	MCL1	NM_001197320	myeloid cell leukemia sequence 1 (BCL2-related)	12.2616	11.8713	2.62584	1.31071	0.007268	0.104277	up	coding	608
212351_at	EIF2B5	NM_003907	eukaryotic translation initiation factor 2B, subunit 5 epsilon, 82kDa	10.2564	10.6053	-2.62571	-1.27353	0.00727	0.092563	down	coding	609
210119_at	KCNJ15	NM_001276435	potassium inwardly-rectifying channel, subfamily J, member 15	12.7343	11.8942	2.62556	1.79013	0.007272	0.104277	up	coding	610
209653_at	KPNA4	NM_002268	karyopherin alpha 4 (importin alpha 3)	8.42744	7.79624	2.62561	1.54885	0.007272	0.104277	up	coding	611
221971_x_at	AGAP10	NM_001040053	ArfGAP with GTPase domain, ankyrin repeat and PH domain 10	9.52603	9.9616	-2.62541	-1.35245	0.007276	0.092563	down	coding	612
216889_s_at	HNF4A	NM_000457	hepatocyte nuclear factor 4, alpha	5.81143	5.52965	2.62482	1.2157	0.007286	0.104277	up	coding	613
219095_at	JMJD7	NM_001114632	jumonji domain containing 7	8.96828	9.32197	-2.6238	-1.27782	0.007305	0.092563	down	coding	614
204228_at	PPIH	NM_006347	peptidylprolyl isomerase H (cyclophilin H)	10.2853	10.6865	-2.62246	-1.32055	0.007329	0.092563	down	coding	615
200603_at	PRKAR1A	NM_001276289	protein kinase, cAMP-dependent, regulatory, type I, alpha	11.3599	11.0083	2.62212	1.27599	0.007336	0.104277	up	coding	616
208052_x_at	CEACAM3	NM_001277163	carcinoembryonic antigen-related cell adhesion molecule 3	10.0298	9.06561	2.6218	1.95098	0.007343	0.104277	up	coding	617
214657_s_at	MIR612	NR_002802	microRNA 612	8.09392	7.21434	2.62146	1.83984	0.007349	0.104277	up	coding	618
203748_x_at	RBMS1	NM_002897	RNA binding motif, single stranded interacting protein 1	11.9795	11.5717	2.62146	1.32662	0.007349	0.104277	up	coding	619
218974_at	SOBP	NM_018013	sine oculis binding protein homolog (Drosophila)	6.13551	6.97949	-2.62082	-1.795	0.007362	0.092563	down	coding	620
74694_s_at	RABEP2	NM_024816	rabaptin, RAB GTPase binding effector protein 2	8.01533	8.51198	-2.62053	-1.41093	0.007367	0.092563	down	coding	621
202906_s_at	NBN	NM_001024688	nibrin	10.9971	10.3512	2.62016	1.56472	0.007373	0.104277	up	coding	622
203658_at	SLC25A20	NM_000387	solute carrier family 25 (carnitine/acylcarnitine translocase), member 20	9.95101	9.45986	2.61946	1.40556	0.007386	0.104277	up	coding	623
205058_at	SLC26A1	NM_022042	solute carrier family 26 (sulfate transporter), member 1	5.61083	5.28137	2.61911	1.25654	0.007392	0.104277	up	coding	624
201041_s_at	DUSP1	NM_004417	dual specificity phosphatase 1	12.2422	11.5072	2.61871	1.66444	0.0074	0.104277	up	coding	625
210404_x_at	CAMK2B	NM_001220	calcium/calmodulin-dependent protein kinase II beta	4.64375	4.35484	2.61783	1.22171	0.007417	0.104277	up	coding	626
219308_s_at	AK5	NM_012093	adenylate kinase 5	6.54617	7.56058	-2.61725	-2.02007	0.007428	0.092563	down	coding	627
221915_s_at	RANBP1	NM_002882	RAN binding protein 1	8.85824	9.16873	-2.61612	-1.24013	0.007449	0.092563	down	coding	628
215509_s_at	BUB1	NM_004336	BUB1 mitotic checkpoint serine/threonine kinase	5.54604	5.99162	-2.6154	-1.36186	0.007465	0.092563	down	coding	629
203175_at	RHOG	NM_001665	ras homolog family member G	12.1104	11.6278	2.61477	1.39729	0.007477	0.104277	up	coding	630
208724_s_at	RAB1A	NM_004161	RAB1A, member RAS oncogene family	11.5368	11.2145	2.61431	1.25029	0.007487	0.104277	up	coding	631
202148_s_at	PYCR1	NM_006907	pyrroline-5-carboxylate reductase 1	6.01779	5.77084	2.61266	1.1867	0.007526	0.104277	up	coding	632
213942_at	MEGF6	NM_001409	multiple EGF-like-domains 6	7.3126	7.7325	-2.61162	-1.33784	0.007545	0.092563	down	coding	633
207266_x_at	RBMS1	NM_002897	RNA binding motif, single stranded interacting protein 1	11.9106	11.5035	2.61127	1.32602	0.007552	0.104277	up	coding	634
201415_at	GSS	NM_000178	glutathione synthetase	10.2248	10.5587	-2.61113	-1.26049	0.007554	0.092563	down	coding	635
201767_s_at	ELAC2	NM_001165962	elaC ribonuclease Z 2	9.23287	9.67129	-2.61076	-1.35512	0.007563	0.092563	down	coding	636
219658_at	PTCD2	NM_024754	pentatricopeptide repeat domain 2	6.92132	7.36596	-2.60984	-1.36098	0.007583	0.092563	down	coding	637
208636_at	ACTN1	NM_001102	actinin, alpha 1	12.0636	11.8237	2.60928	1.18094	0.007596	0.104277	up	coding	638
201766_at	ELAC2	NM_001165962	elaC ribonuclease Z 2	5.30303	5.80177	-2.60821	-1.41299	0.007621	0.092563	down	coding	639
216128_at	TBCD	NM_001033052	tubulin folding cofactor D	5.38301	5.18994	2.60779	1.14319	0.00763	0.104277	up	coding	640
209004_s_at	FBXL5	NM_001193534	F-box and leucine-rich repeat protein 5	12.3328	11.8935	2.60713	1.35602	0.007644	0.104277	up	coding	641
39817_s_at	DNPH1	NM_006443	2'-deoxynucleoside 5'-phosphate N-hydrolase 1	8.33368	8.73979	-2.60556	-1.32511	0.007675	0.092563	down	coding	642
215990_s_at	BCL6	NM_001130845	B-cell CLL/lymphoma 6	10.7875	9.5243	2.60546	2.40031	0.007677	0.104277	up	coding	643
202626_s_at	LYN	NM_001111097	v-yes-1 Yamaguchi sarcoma viral related oncogene homolog	12.3399	11.8273	2.60522	1.42661	0.007682	0.104277	up	coding	644
205119_s_at	FPR1	NM_001193306	formyl peptide receptor 1	13.1941	12.8146	2.60453	1.3009	0.007696	0.104277	up	coding	645
208299_at	CACNA1I	NM_001003406	calcium channel, voltage-dependent, T type, alpha 1I subunit	6.43122	6.23689	2.6045	1.14419	0.007696	0.104277	up	coding	646
211067_s_at	GAS7	NM_001130831	growth arrest-specific 7	11.1038	10.0463	2.60441	2.08128	0.007699	0.104277	up	coding	647
210102_at	VWA5A	NM_001130142	von Willebrand factor A domain containing 5A	8.12423	7.56435	2.60434	1.47414	0.007701	0.104277	up	coding	648
213420_at	DHX57	NM_198963	DEAH (Asp-Glu-Ala-Asp/His) box polypeptide 57	7.58548	7.96756	-2.60432	-1.30322	0.007702	0.092563	down	coding	649
206298_at	ARHGAP22	NM_001256024	Rho GTPase activating protein 22	6.95891	7.71645	-2.60356	-1.69061	0.007716	0.092563	down	coding	650
207545_s_at	NUMB	NM_001005743	numb homolog (Drosophila)	11.5687	11.1363	2.60327	1.3495	0.007721	0.104277	up	coding	651
214022_s_at	IFITM1	NM_003641	interferon induced transmembrane protein 1	13.593	13.2619	2.60324	1.25796	0.007723	0.104277	up	coding	652
214706_at	ZNF200	NM_001145446	zinc finger protein 200	8.65888	8.00892	2.60247	1.56912	0.007738	0.104277	up	coding	653
214585_s_at	VPS52	NM_022553	vacuolar protein sorting 52 homolog (S. cerevisiae)	10.6032	10.893	-2.60126	-1.22245	0.007767	0.092563	down	coding	654
217738_at	NAMPT	NM_005746	nicotinamide phosphoribosyltransferase	12.3613	11.509	2.60088	1.80527	0.007774	0.104277	up	coding	655
204574_s_at	MMP19	NM_001032360	matrix metallopeptidase 19	11.0815	11.6146	-2.60074	-1.44703	0.007778	0.092563	down	coding	656
219394_at	PGS1	NM_024419	phosphatidylglycerophosphate synthase 1	11.0881	10.1953	2.5987	1.85676	0.00782	0.104277	up	coding	657
215920_s_at	NPIPB3	NM_130464	nuclear pore complex interacting protein family, member B3	7.90761	8.3879	-2.59865	-1.39503	0.00782	0.092563	down	coding	658
219298_at	ECHDC3	NM_024693	enoyl CoA hydratase domain containing 3	8.58296	7.90227	2.5978	1.6029	0.007842	0.104277	up	coding	659
221214_s_at	NSMF	NM_001130969	NMDA receptor synaptonuclear signaling and neuronal migration factor	7.89745	8.22793	-2.59748	-1.25743	0.007847	0.092563	down	coding	660
215352_at	GIMAP1-GIMAP5	NM_001199577	GIMAP1-GIMAP5 readthrough	7.54988	8.15849	-2.59703	-1.52479	0.007858	0.092563	down	coding	661
206765_at	KCNJ2	NM_000891	potassium inwardly-rectifying channel, subfamily J, member 2	12.3301	11.5686	2.59627	1.69533	0.007871	0.104277	up	coding	662
215069_at	NMT2	NM_004808	N-myristoyltransferase 2	7.10897	7.78756	-2.59502	-1.60058	0.007895	0.092563	down	coding	663
213195_at	LYRM9	NM_001076680	LYR motif containing 9	9.98723	10.5679	-2.59504	-1.49555	0.007895	0.092563	down	coding	664
218505_at	WDR59	NM_030581	WD repeat domain 59	10.4491	10.909	-2.59399	-1.37549	0.007917	0.092563	down	coding	665
206025_s_at	TNFAIP6	NM_007115	tumor necrosis factor, alpha-induced protein 6	10.4531	8.67963	2.59268	3.41878	0.007942	0.104277	up	coding	666
215907_at	---	---	---	9.63853	10.188	-2.59209	-1.46351	0.007955	0.092563	down	coding	667
221278_at	HOXB8	NM_024016	homeobox B8	4.49005	4.30576	2.59088	1.13626	0.007983	0.104277	up	coding	668
204454_at	LDOC1	NM_012317	leucine zipper, down-regulated in cancer 1	7.0237	7.65546	-2.58979	-1.54946	0.008005	0.092563	down	coding	669
205193_at	MAFF	NM_001161572	v-maf musculoaponeurotic fibrosarcoma oncogene homolog F (avian)	7.88119	7.39512	2.58956	1.40062	0.00801	0.104277	up	coding	670
221674_s_at	CHRD	NM_003741	chordin	4.86794	4.59694	2.58914	1.20664	0.00802	0.104277	up	coding	671
204294_at	AMT	NM_000481	aminomethyltransferase	8.38715	8.83934	-2.58831	-1.36812	0.008041	0.092563	down	coding	672
220935_s_at	CDK5RAP2	NM_001011649	CDK5 regulatory subunit associated protein 2	10.2015	8.81569	2.5878	2.61313	0.008054	0.104277	up	coding	673
214435_x_at	RALA	NM_005402	v-ral simian leukemia viral oncogene homolog A (ras related)	8.57687	8.19199	2.58759	1.30575	0.008058	0.104277	up	coding	674
209544_at	RIPK2	NM_003821	receptor-interacting serine-threonine kinase 2	7.93505	7.36726	2.5874	1.48226	0.008062	0.104277	up	coding	675
203853_s_at	GAB2	NM_012296	GRB2-associated binding protein 2	10.3245	9.7455	2.58604	1.49377	0.00809	0.104277	up	coding	676
216732_at	---	---	---	3.36202	3.57637	-2.58507	-1.16017	0.008109	0.092563	down	coding	677
203278_s_at	PHF21A	NM_001101802	PHD finger protein 21A	12.2883	11.8764	2.58413	1.33042	0.008128	0.104277	up	coding	678
202251_at	PRPF3	NM_004698	pre-mRNA processing factor 3	11.0887	11.2894	-2.58351	-1.14925	0.00814	0.092563	down	coding	679
210754_s_at	LYN	NM_001111097	v-yes-1 Yamaguchi sarcoma viral related oncogene homolog	12.3604	11.825	2.58323	1.44933	0.008147	0.104277	up	coding	680
205101_at	CIITA	NM_000246	class II, major histocompatibility complex, transactivator	10.8573	11.2984	-2.58124	-1.35766	0.008189	0.092563	down	coding	681
216784_at	---	---	---	5.84636	5.59492	2.58114	1.1904	0.00819	0.104277	up	coding	682
221463_at	CCL24	NM_002991	chemokine (C-C motif) ligand 24	5.80207	5.53559	2.58065	1.20287	0.008202	0.104277	up	coding	683
212561_at	DENND5A	NM_001243254	DENN/MADD domain containing 5A	12.7937	12.555	2.57992	1.1799	0.008215	0.104277	up	coding	684
204718_at	EPHB6	NM_004445	EPH receptor B6	8.59136	9.08606	-2.57912	-1.40903	0.008231	0.092563	down	coding	685
200669_s_at	UBE2D3	NM_003340	ubiquitin-conjugating enzyme E2D 3	12.3091	12.043	2.579	1.20257	0.008234	0.104277	up	coding	686
205666_at	FMO1	NM_002021	flavin containing monooxygenase 1	4.77452	5.14537	-2.57878	-1.29312	0.008238	0.092563	down	coding	687
207164_s_at	ZBTB18	NM_001278196	zinc finger and BTB domain containing 18	5.53429	5.003	2.57772	1.44522	0.008259	0.104277	up	coding	688
219840_s_at	TCL6	NM_012468	T-cell leukemia/lymphoma 6 (non-protein coding)	5.97018	6.86636	-2.57756	-1.86114	0.008262	0.092563	down	coding	689
217576_x_at	SOS2	NM_006939	son of sevenless homolog 2 (Drosophila)	7.12443	6.55808	2.57711	1.48077	0.008274	0.104277	up	coding	690
207693_at	CACNB4	NM_000726	calcium channel, voltage-dependent, beta 4 subunit	5.54665	6.24322	-2.57697	-1.62064	0.008277	0.092563	down	coding	691
204908_s_at	BCL3	NM_005178	B-cell CLL/lymphoma 3	11.8588	11.2212	2.57684	1.55576	0.008281	0.104277	up	coding	692
209514_s_at	RAB27A	NM_004580	RAB27A, member RAS oncogene family	10.6996	10.0016	2.57626	1.62229	0.008296	0.104277	up	coding	693
215043_s_at	GUSBP3	NM_006780	glucuronidase, beta pseudogene 3	11.7717	10.5284	2.57587	2.36738	0.008303	0.104277	up	coding	694
212577_at	SMCHD1	NM_015295	structural maintenance of chromosomes flexible hinge domain containing 1	10.221	9.62785	2.57514	1.50854	0.008317	0.104277	up	coding	695
209199_s_at	MEF2C	NM_001131005	myocyte enhancer factor 2C	11.1975	11.62	-2.57405	-1.34027	0.008343	0.092563	down	coding	696
216291_at	ZNF440	NM_152357	zinc finger protein 440	5.0017	5.37173	-2.57358	-1.29238	0.008354	0.092563	down	coding	697
213383_at	SBF1	NM_002972	SET binding factor 1	11.4587	11.8121	-2.57362	-1.2776	0.008354	0.092563	down	coding	698
206369_s_at	PIK3CG	NM_002649	phosphatidylinositol-4,5-bisphosphate 3-kinase, catalytic subunit gamma	9.02384	8.4793	2.57334	1.45855	0.008358	0.104277	up	coding	699
209782_s_at	DBP	NM_001352	D site of albumin promoter (albumin D-box) binding protein	7.88767	8.50065	-2.5723	-1.52942	0.008382	0.092563	down	coding	700
205220_at	HCAR3	NM_006018	hydroxycarboxylic acid receptor 3	11.8538	10.8506	2.57224	2.00448	0.008385	0.104277	up	coding	701
214962_s_at	NUP160	NM_015231	nucleoporin 160kDa	7.02839	7.51343	-2.57209	-1.39962	0.008388	0.092563	down	coding	702
205019_s_at	VIPR1	NM_001251882	vasoactive intestinal peptide receptor 1	9.18644	9.92224	-2.57162	-1.66531	0.008397	0.092563	down	coding	703
208670_s_at	EID1	NM_014335	EP300 interacting inhibitor of differentiation 1	11.5603	11.8315	-2.57136	-1.20677	0.008404	0.092563	down	coding	704
204310_s_at	NPR2	NM_000907	natriuretic peptide receptor B/guanylate cyclase B (atrionatriuretic peptide receptor B)	6.44144	6.84401	-2.57083	-1.32186	0.008417	0.092563	down	coding	705
209726_at	CA11	NM_001217	carbonic anhydrase XI	6.29143	6.65423	-2.57041	-1.28592	0.008426	0.092563	down	coding	706
205227_at	IL1RAP	NM_001167928	interleukin 1 receptor accessory protein	9.48453	8.83115	2.56957	1.57284	0.008442	0.104277	up	coding	707
213075_at	OLFML2A	NM_182487	olfactomedin-like 2A	4.49614	5.02227	-2.5692	-1.44007	0.00845	0.092563	down	coding	708
57532_at	DVL2	NM_004422	dishevelled segment polarity protein 2	9.98658	10.3202	-2.56888	-1.2602	0.00846	0.092563	down	coding	709
207930_at	LCN1	NM_001252617	lipocalin 1	6.04694	5.80872	2.5689	1.17954	0.00846	0.104277	up	coding	710
205429_s_at	MPP6	NM_016447	membrane protein, palmitoylated 6 (MAGUK p55 subfamily member 6)	4.68615	5.33113	-2.56846	-1.56372	0.00847	0.092563	down	coding	711
211965_at	ZFP36L1	NM_001244698	ZFP36 ring finger protein-like 1	10.8218	10.1267	2.56792	1.61897	0.00848	0.104277	up	coding	712
208965_s_at	IFI16	NM_001206567	interferon, gamma-inducible protein 16	12.6455	12.3043	2.56638	1.26684	0.008512	0.104277	up	coding	713
220064_at	LOC100506124	NM_024753	uncharacterized LOC100506124	7.51281	8.1956	-2.5661	-1.60524	0.008518	0.092563	down	coding	714
202182_at	KAT2A	NM_021078	K(lysine) acetyltransferase 2A	7.97247	8.34061	-2.56517	-1.29069	0.008538	0.092563	down	coding	715
213361_at	TDRD7	NM_014290	tudor domain containing 7	10.5256	9.91057	2.56314	1.53159	0.008584	0.104277	up	coding	716
206332_s_at	IFI16	NM_001206567	interferon, gamma-inducible protein 16	12.2722	11.8796	2.56211	1.31274	0.008607	0.104277	up	coding	717
214660_at	ITGA1	NM_181501	integrin, alpha 1	3.72193	3.2635	2.56164	1.37404	0.008619	0.104277	up	coding	718
211749_s_at	VAMP3	NM_004781	vesicle-associated membrane protein 3	9.90932	9.23492	2.56156	1.59593	0.008621	0.104277	up	coding	719
218476_at	POMT1	NM_001077365	protein-O-mannosyltransferase 1	8.82081	9.30987	-2.5613	-1.40354	0.008625	0.092563	down	coding	720
214339_s_at	MAP4K1	NM_001042600	mitogen-activated protein kinase kinase kinase kinase 1	10.1295	10.7885	-2.56122	-1.57894	0.008627	0.092563	down	coding	721
207945_s_at	CSNK1D	NM_001893	casein kinase 1, delta	10.4559	10.0061	2.56122	1.36584	0.008628	0.104277	up	coding	722
213947_s_at	NUP210	NM_024923	nucleoporin 210kDa	10.4228	10.8505	-2.56108	-1.34506	0.008632	0.092563	down	coding	723
AFFX-LysX-5_at	---	---	---	3.13752	2.96033	2.56093	1.13068	0.008635	0.104277	up	coding	724
201995_at	EXT1	NM_000127	exostosin glycosyltransferase 1	9.2781	8.69432	2.56068	1.49877	0.008643	0.104277	up	coding	725
206656_s_at	APMAP	NM_020531	adipocyte plasma membrane associated protein	12.6129	12.2364	2.55977	1.29816	0.008663	0.104277	up	coding	726
210951_x_at	RAB27A	NM_004580	RAB27A, member RAS oncogene family	10.8277	10.1532	2.55911	1.59606	0.008681	0.104277	up	coding	727
201596_x_at	KRT18	NM_000224	keratin 18	7.15411	7.57163	-2.55806	-1.33563	0.008707	0.092563	down	coding	728
204521_at	FAM216A	NM_013300	family with sequence similarity 216, member A	8.28468	8.75632	-2.55712	-1.38668	0.008728	0.092563	down	coding	729
216183_at	TGM2	NM_004613	transglutaminase 2 (C polypeptide, protein-glutamine-gamma-glutamyltransferase)	5.50905	5.22371	2.55672	1.2187	0.008738	0.104277	up	coding	730
212090_at	GRINA	NM_000837	glutamate receptor, ionotropic, N-methyl D-aspartate-associated protein 1 (glutamate binding)	9.83831	9.02198	2.55611	1.76092	0.008752	0.104277	up	coding	731
208206_s_at	RASGRP2	NM_001098670	RAS guanyl releasing protein 2 (calcium and DAG-regulated)	12.3261	12.6717	-2.55543	-1.27071	0.008768	0.092563	down	coding	732
202604_x_at	ADAM10	NM_001110	ADAM metallopeptidase domain 10	8.65795	8.13373	2.55529	1.43816	0.008773	0.104277	up	coding	733
216489_at	TRPM3	NM_001007470	transient receptor potential cation channel, subfamily M, member 3	3.91745	3.6487	2.55492	1.20476	0.008783	0.104277	up	coding	734
207169_x_at	DDR1	NM_001202521	discoidin domain receptor tyrosine kinase 1	6.90925	7.47617	-2.55459	-1.48136	0.008793	0.092563	down	coding	735
205239_at	AREG	NM_001657	amphiregulin	3.94674	2.96154	2.55402	1.97959	0.008808	0.104277	up	coding	736
213703_at	LINC00342	XR_109915	long intergenic non-protein coding RNA 342	9.73354	10.4093	-2.55394	-1.59747	0.008809	0.092563	down	coding	737
202789_at	PLCG1	NM_002660	phospholipase C, gamma 1	11.0112	11.6429	-2.55246	-1.54941	0.008843	0.092563	down	coding	738
207446_at	TLR6	NM_006068	toll-like receptor 6	8.76656	7.82258	2.55202	1.92383	0.008852	0.104277	up	coding	739
205409_at	FOSL2	NM_005253	FOS-like antigen 2	8.04171	7.45668	2.55173	1.50007	0.008858	0.104277	up	coding	740
217742_s_at	WAC	NM_016628	WW domain containing adaptor with coiled-coil	11.3292	11.1314	2.55127	1.14691	0.008871	0.104277	up	coding	741
215722_s_at	SNRPA1	NM_003090	small nuclear ribonucleoprotein polypeptide A'	10.6959	11.102	-2.55079	-1.32512	0.008879	0.092563	down	coding	742
214290_s_at	HIST2H2AA3	NM_001040874	histone cluster 2, H2aa3	12.3577	11.5739	2.55019	1.72165	0.008895	0.104277	up	coding	743
202737_s_at	LSM4	NM_001252129	LSM4 homolog, U6 small nuclear RNA associated (S. cerevisiae)	11.967	12.2701	-2.54889	-1.23376	0.008924	0.092563	down	coding	744
205977_s_at	EPHA1	NM_005232	EPH receptor A1	7.41536	8.0744	-2.54882	-1.57903	0.008925	0.092563	down	coding	745
209090_s_at	SH3GLB1	NM_001206651	SH3-domain GRB2-like endophilin B1	11.2198	10.8572	2.54874	1.28575	0.008928	0.104277	up	coding	746
203996_s_at	C21orf2	NM_001271440	chromosome 21 open reading frame 2	9.99745	10.5609	-2.5486	-1.47781	0.00893	0.092563	down	coding	747
217926_at	C19orf53	NM_014047	chromosome 19 open reading frame 53	12.0012	12.2698	-2.54837	-1.20467	0.008934	0.092563	down	coding	748
202846_s_at	LOC100505991	NM_002642	uncharacterized LOC100505991	10.7204	10.9256	-2.54829	-1.15288	0.008936	0.092563	down	coding	749
203995_at	C21orf2	NM_001271440	chromosome 21 open reading frame 2	9.10987	9.64913	-2.54807	-1.45323	0.008941	0.092563	down	coding	750
215124_at	ZNF550	NM_001039654	zinc finger protein 550	4.85286	5.35628	-2.54806	-1.41757	0.008942	0.092563	down	coding	751
209322_s_at	SH2B1	NM_001145795	SH2B adaptor protein 1	7.61885	7.8383	-2.54773	-1.16429	0.00895	0.092563	down	coding	752
203134_at	PICALM	NM_001008660	phosphatidylinositol binding clathrin assembly protein	7.32936	6.91317	2.54611	1.3344	0.008992	0.104277	up	coding	753
204737_s_at	MYH6	NM_000257	myosin, heavy chain 6, cardiac muscle, alpha	7.07791	6.79374	2.54609	1.21771	0.008993	0.104277	up	coding	754
221755_at	EHBP1L1	NM_001099409	EH domain binding protein 1-like 1	6.50728	6.16263	2.54588	1.26984	0.008998	0.104277	up	coding	755
219019_at	PIDD	NM_018494	p53-induced death domain protein	7.82153	8.20236	-2.5454	-1.30209	0.009008	0.092563	down	coding	756
210602_s_at	CDH6	NM_004932	cadherin 6, type 2, K-cadherin (fetal kidney)	4.6253	4.83302	-2.54542	-1.15486	0.009008	0.092563	down	coding	757
221945_at	FBXO41	NM_001080410	F-box protein 41	7.1872	7.5324	-2.54529	-1.27032	0.009012	0.092563	down	coding	758
206749_at	CD1B	NM_001764	CD1b molecule	3.43806	3.89422	-2.54502	-1.37188	0.009019	0.092563	down	coding	759
207247_s_at	ZFX	NM_001145275	zinc finger protein, X-linked	6.32599	5.61794	2.54473	1.63359	0.009026	0.104277	up	coding	760
220566_at	PIK3R5	NM_001142633	phosphoinositide-3-kinase, regulatory subunit 5	8.15578	7.836	2.54459	1.24815	0.009029	0.104277	up	coding	761
208835_s_at	LUC7L3	NM_006107	LUC7-like 3 (S. cerevisiae)	12.7312	12.9724	-2.54455	-1.18201	0.009031	0.092563	down	coding	762
204490_s_at	CD44	NM_000610	CD44 molecule (Indian blood group)	12.3297	11.9791	2.54429	1.27514	0.009036	0.104277	up	coding	763
215619_at	---	---	---	5.19365	5.9714	-2.54415	-1.71447	0.009039	0.092563	down	coding	764
217095_x_at	NCR1	NM_001145457	natural cytotoxicity triggering receptor 1	6.73494	6.48743	2.54417	1.18715	0.009039	0.104277	up	coding	765
222190_s_at	C16orf58	NM_022744	chromosome 16 open reading frame 58	8.95873	9.33263	-2.54397	-1.29585	0.009044	0.092563	down	coding	766
208351_s_at	MAPK1	NM_002745	mitogen-activated protein kinase 1	9.168	8.68332	2.54365	1.39928	0.009052	0.104277	up	coding	767
202907_s_at	NBN	NM_001024688	nibrin	11.3424	10.8622	2.54264	1.39498	0.009076	0.104277	up	coding	768
218366_x_at	METTL17	NM_001029991	methyltransferase like 17	10.4637	10.8847	-2.54257	-1.3389	0.009078	0.092563	down	coding	769
215832_x_at	PICALM	NM_001008660	phosphatidylinositol binding clathrin assembly protein	8.01226	7.5881	2.54205	1.3418	0.00909	0.104277	up	coding	770
206649_s_at	TFE3	NM_006521	transcription factor binding to IGHM enhancer 3	9.74765	9.26162	2.54151	1.40059	0.009105	0.104277	up	coding	771
214219_x_at	MAP4K1	NM_001042600	mitogen-activated protein kinase kinase kinase kinase 1	9.88694	10.5248	-2.5396	-1.55604	0.009151	0.092563	down	coding	772
212173_at	AK2	NM_001199199	adenylate kinase 2	8.20474	8.63847	-2.53842	-1.35072	0.00918	0.092563	down	coding	773
204489_s_at	CD44	NM_000610	CD44 molecule (Indian blood group)	12.2145	11.9199	2.53819	1.22652	0.009186	0.104277	up	coding	774
204068_at	STK3	NM_001256312	serine/threonine kinase 3	9.82272	8.79391	2.53704	2.04034	0.00921	0.104277	up	coding	775
222006_at	LETM1	NM_012318	leucine zipper-EF-hand containing transmembrane protein 1	11.7486	12.0938	-2.53669	-1.27031	0.00922	0.092563	down	coding	776
203146_s_at	GABBR1	NM_001470	gamma-aminobutyric acid (GABA) B receptor, 1	10.3229	10.6108	-2.53656	-1.22093	0.009222	0.092563	down	coding	777
220100_at	SLC22A11	NM_018484	solute carrier family 22 (organic anion/urate transporter), member 11	3.97951	3.71682	2.53644	1.19971	0.009226	0.104277	up	coding	778
212136_at	ATP2B4	NM_001001396	ATPase, Ca++ transporting, plasma membrane 4	9.85855	9.48108	2.53611	1.29906	0.009233	0.104277	up	coding	779
203232_s_at	ATXN1	NM_000332	ataxin 1	10.7986	10.2783	2.5357	1.43426	0.009242	0.104277	up	coding	780
213296_at	RER1	NM_007033	RER1 retention in endoplasmic reticulum 1 homolog (S. cerevisiae)	10.0888	10.3142	-2.53514	-1.16908	0.009251	0.092563	down	coding	781
201416_at	SOX4	NM_003107	SRY (sex determining region Y)-box 4	6.28796	6.8326	-2.53393	-1.45866	0.00928	0.092563	down	coding	782
60528_at	JMJD7	NM_001114632	jumonji domain containing 7	7.72484	8.11725	-2.53389	-1.31258	0.009281	0.092563	down	coding	783
218943_s_at	DDX58	NM_014314	DEAD (Asp-Glu-Ala-Asp) box polypeptide 58	10.4815	9.67239	2.53368	1.7521	0.009285	0.104277	up	coding	784
220535_at	FAM90A1	NM_018088	family with sequence similarity 90, member A1	5.28341	4.76229	2.53357	1.43508	0.009288	0.104277	up	coding	785
213107_at	TNIK	NM_001161560	TRAF2 and NCK interacting kinase	7.04556	7.64744	-2.53303	-1.51769	0.009303	0.092563	down	coding	786
201757_at	NDUFS5	NM_001184979	NADH dehydrogenase (ubiquinone) Fe-S protein 5, 15kDa (NADH-coenzyme Q reductase)	11.9403	12.3523	-2.53295	-1.33051	0.009307	0.092563	down	coding	787
202299_s_at	LAMTOR5	NM_006402	late endosomal/lysosomal adaptor, MAPK and MTOR activator 5	11.5438	11.2236	2.53294	1.24846	0.009307	0.104277	up	coding	788
213397_x_at	RNASE4	NM_002937	ribonuclease, RNase A family, 4	8.57268	7.98607	2.53238	1.50171	0.009324	0.104277	up	coding	789
217498_at	---	---	---	5.57162	6.12554	-2.53207	-1.46806	0.009329	0.092563	down	coding	790
218488_at	EIF2B3	NM_001166588	eukaryotic translation initiation factor 2B, subunit 3 gamma, 58kDa	9.04363	9.34138	-2.53165	-1.22923	0.009337	0.092563	down	coding	791
202601_s_at	HTATSF1	NM_001163280	HIV-1 Tat specific factor 1	6.14179	6.67731	-2.53114	-1.44946	0.009351	0.092563	down	coding	792
213478_at	KAZN	NM_001017999	kazrin, periplakin interacting protein	8.05197	7.1185	2.53062	1.90986	0.009364	0.104277	up	coding	793
210758_at	PSIP1	NM_001128217	PC4 and SFRS1 interacting protein 1	8.05351	8.44868	-2.5306	-1.3151	0.009364	0.092563	down	coding	794
210564_x_at	CFLAR	NM_001127183	CASP8 and FADD-like apoptosis regulator	11.0747	10.4802	2.53042	1.50998	0.009368	0.104277	up	coding	795
208380_at	LBX1	NM_006562	ladybird homeobox 1	5.85097	5.66975	2.52977	1.13384	0.009384	0.104277	up	coding	796
207968_s_at	MEF2C	NM_001131005	myocyte enhancer factor 2C	7.87144	8.32488	-2.52826	-1.3693	0.009429	0.092563	down	coding	797
220961_s_at	TBRG4	NM_001261834	transforming growth factor beta regulator 4	7.1788	7.45	-2.52801	-1.20681	0.009435	0.092563	down	coding	798
214285_at	FABP3	NM_004102	fatty acid binding protein 3, muscle and heart (mammary-derived growth inhibitor)	9.69234	10.1933	-2.5277	-1.41518	0.009442	0.092563	down	coding	799
209975_at	CYP2E1	NM_000773	cytochrome P450, family 2, subfamily E, polypeptide 1	5.66413	6.65915	-2.52746	-1.99312	0.009447	0.092563	down	coding	800
212816_s_at	CBS	NM_000071	cystathionine-beta-synthase	7.16261	6.15638	2.52695	2.00866	0.009461	0.104277	up	coding	801
202880_s_at	CYTH1	NM_004762	cytohesin 1	12.0803	12.2635	-2.52645	-1.13541	0.009474	0.092563	down	coding	802
206712_at	GRTP1	NM_024719	growth hormone regulated TBC protein 1	6.34182	6.08447	2.52563	1.19529	0.009494	0.104277	up	coding	803
203488_at	LPHN1	NM_001008701	latrophilin 1	6.24259	6.54918	-2.52529	-1.23678	0.009505	0.092563	down	coding	804
219862_s_at	NARF	NM_001038618	nuclear prelamin A recognition factor	11.7547	11.2522	2.52489	1.41673	0.009513	0.104277	up	coding	805
216843_x_at	PMS2P1	NM_005394	postmeiotic segregation increased 2 pseudogene 1	9.31708	9.66405	-2.52474	-1.27189	0.009518	0.092563	down	coding	806
218299_at	C11orf24	NM_022338	chromosome 11 open reading frame 24	8.29974	8.65232	-2.52372	-1.27684	0.009546	0.092563	down	coding	807
222012_at	DCAF15	NM_138353	DDB1 and CUL4 associated factor 15	8.94227	9.24083	-2.52365	-1.22992	0.009548	0.092563	down	coding	808
201146_at	NFE2L2	NM_001145412	nuclear factor (erythroid-derived 2)-like 2	10.647	10.1188	2.52357	1.44205	0.00955	0.104277	up	coding	809
203634_s_at	CPT1A	NM_001031847	carnitine palmitoyltransferase 1A (liver)	8.93267	8.42752	2.52335	1.41927	0.009555	0.104277	up	coding	810
219623_at	ACTR5	NM_024855	ARP5 actin-related protein 5 homolog (yeast)	8.91526	9.28884	-2.52338	-1.29556	0.009555	0.092563	down	coding	811
215203_at	GOLGA4	NM_001172713	golgin A4	8.01256	8.66281	-2.52323	-1.56943	0.009558	0.092563	down	coding	812
215336_at	AKAP11	NM_016248	A kinase (PRKA) anchor protein 11	7.40835	8.01111	-2.52278	-1.51861	0.009571	0.092563	down	coding	813
205407_at	RECK	NM_021111	reversion-inducing-cysteine-rich protein with kazal motifs	6.787	7.53179	-2.5224	-1.67574	0.009581	0.092563	down	coding	814
222094_at	LOC101060714	NM_001014999	sulfotransferase 1A3/1A4-like	8.30213	8.7212	-2.52241	-1.33706	0.009581	0.092563	down	coding	815
201111_at	CSE1L	NM_001256135	CSE1 chromosome segregation 1-like (yeast)	9.32117	9.74294	-2.5221	-1.33957	0.009588	0.092563	down	coding	816
219039_at	SEMA4C	NM_017789	sema domain, immunoglobulin domain (Ig), transmembrane domain (TM) and short cytoplasmic domain, (semaphorin) 4C	7.31054	7.86112	-2.5217	-1.46467	0.009599	0.092563	down	coding	817
203188_at	B3GNT1	NM_006876	UDP-GlcNAc:betaGal beta-1,3-N-acetylglucosaminyltransferase 1	7.50186	8.10308	-2.5215	-1.517	0.009604	0.092563	down	coding	818
219950_s_at	TIAM2	NM_001010927	T-cell lymphoma invasion and metastasis 2	8.87668	9.28932	-2.52136	-1.33112	0.009608	0.092563	down	coding	819
205689_at	PCNXL2	NM_014801	pecanex-like 2 (Drosophila)	7.77913	8.29506	-2.52083	-1.42991	0.009621	0.092563	down	coding	820
220049_s_at	PDCD1LG2	NM_025239	programmed cell death 1 ligand 2	5.24012	4.14456	2.52049	2.13697	0.009631	0.104277	up	coding	821
202683_s_at	RNMT	NM_003799	RNA (guanine-7-) methyltransferase	10.4107	10.7865	-2.52047	-1.29757	0.009631	0.092563	down	coding	822
207826_s_at	ID3	NM_002167	inhibitor of DNA binding 3, dominant negative helix-loop-helix protein	9.23859	10.0274	-2.5202	-1.72769	0.009638	0.092563	down	coding	823
220748_s_at	ZNF580	NM_001163423	zinc finger protein 580	9.70993	10.0669	-2.51997	-1.28073	0.009645	0.092563	down	coding	824
221760_at	MAN1A1	NM_005907	mannosidase, alpha, class 1A, member 1	10.3974	9.66108	2.5198	1.66592	0.009647	0.104277	up	coding	825
218456_at	CAPRIN2	NM_001002259	caprin family member 2	9.60993	10.1067	-2.51928	-1.41108	0.009661	0.092563	down	coding	826
202620_s_at	PLOD2	NM_000935	procollagen-lysine, 2-oxoglutarate 5-dioxygenase 2	5.35422	4.27616	2.51916	2.1112	0.009665	0.104277	up	coding	827
220449_at	LOC79015	NM_024049	uncharacterized LOC79015	7.8705	8.45367	-2.51836	-1.49813	0.009685	0.092563	down	coding	828
204907_s_at	BCL3	NM_005178	B-cell CLL/lymphoma 3	6.41421	5.91641	2.51769	1.41206	0.0097	0.104277	up	coding	829
210790_s_at	SAR1A	NM_001142648	SAR1 homolog A (S. cerevisiae)	8.64389	8.25247	2.51637	1.31168	0.009734	0.104277	up	coding	830
205754_at	F2	NM_000506	coagulation factor II (thrombin)	4.59281	4.3769	2.51478	1.16143	0.009772	0.104277	up	coding	831
215133_s_at	FAM153A	NM_001079529	family with sequence similarity 153, member A	8.33231	9.35929	-2.51434	-2.03775	0.009784	0.092563	down	coding	832
214100_x_at	NSUN5P1	NM_001039575	NOP2/Sun domain family, member 5 pseudogene 1	10.9342	11.3541	-2.51417	-1.33784	0.009788	0.092563	down	coding	833
203452_at	B3GAT3	NM_012200	beta-1,3-glucuronyltransferase 3 (glucuronosyltransferase I)	10.1246	10.423	-2.5141	-1.22979	0.009789	0.092563	down	coding	834
201975_at	CLIP1	NM_001247997	CAP-GLY domain containing linker protein 1	10.0972	9.80449	2.51414	1.22492	0.009789	0.104277	up	coding	835
203749_s_at	RARA	NM_000964	retinoic acid receptor, alpha	10.0978	9.49106	2.51366	1.52285	0.009799	0.104277	up	coding	836
221615_at	BMP8B	NM_001720	bone morphogenetic protein 8b	8.0954	8.44983	-2.513	-1.27847	0.009815	0.092563	down	coding	837
213706_at	GPD1	NM_001257199	glycerol-3-phosphate dehydrogenase 1 (soluble)	4.82766	4.55764	2.5127	1.20582	0.009823	0.104277	up	coding	838
201060_x_at	STOM	NM_001270526	stomatin	11.8952	11.3583	2.51269	1.45083	0.009824	0.104277	up	coding	839
218280_x_at	HIST2H2AA3	NM_001040874	histone cluster 2, H2aa3	12.2702	11.4516	2.51255	1.76379	0.009828	0.104277	up	coding	840
214977_at	---	---	---	10.6396	9.98672	2.5124	1.57232	0.009832	0.104277	up	coding	841
217795_s_at	TMEM43	NM_024334	transmembrane protein 43	11.2529	10.9623	2.51203	1.22317	0.009844	0.104277	up	coding	842
222284_at	---	---	---	7.90812	8.42801	-2.51183	-1.43385	0.009853	0.092563	down	coding	843
206203_at	RCVRN	NM_002903	recoverin	5.01058	3.80003	2.51158	2.31426	0.009862	0.104277	up	coding	844
205566_at	ABHD2	NM_007011	abhydrolase domain containing 2	9.14502	8.17246	2.51156	1.96231	0.009862	0.104277	up	coding	845
34260_at	TELO2	NM_016111	TEL2, telomere maintenance 2, homolog (S. cerevisiae)	8.2409	8.50926	-2.51086	-1.20444	0.009881	0.092563	down	coding	846
213173_at	PCNX	NM_014982	pecanex homolog (Drosophila)	7.90782	7.40111	2.51073	1.4208	0.009885	0.104277	up	coding	847
210357_s_at	SMOX	NM_001270691	spermine oxidase	9.14675	8.23186	2.51012	1.88542	0.009903	0.104277	up	coding	848
219033_at	PARP8	NM_001178055	poly (ADP-ribose) polymerase family, member 8	12.1709	11.8784	2.50996	1.22472	0.009907	0.104277	up	coding	849
213237_at	KNOP1	NM_001012991	lysine-rich nucleolar protein 1	8.04388	8.53016	-2.50967	-1.40082	0.009915	0.092563	down	coding	850
212135_s_at	ATP2B4	NM_001001396	ATPase, Ca++ transporting, plasma membrane 4	9.92374	9.51293	2.50957	1.32943	0.009918	0.104277	up	coding	851
214092_x_at	SUGP2	NM_001017392	SURP and G patch domain containing 2	10.5696	10.9546	-2.50928	-1.30581	0.009927	0.092563	down	coding	852
205873_at	PIGL	NM_004278	phosphatidylinositol glycan anchor biosynthesis, class L	6.75991	7.40499	-2.50763	-1.56383	0.00997	0.092563	down	coding	853
207691_x_at	ENTPD1	NM_001098175	ectonucleoside triphosphate diphosphohydrolase 1	9.58007	8.8436	2.50733	1.66609	0.009978	0.129888	up	coding	854
209467_s_at	MKNK1	NM_001135553	MAP kinase interacting serine/threonine kinase 1	11.4735	10.8445	2.50698	1.5465	0.009988	0.129888	up	coding	855
222147_s_at	ACTR5	NM_024855	ARP5 actin-related protein 5 homolog (yeast)	7.96844	8.39281	-2.50644	-1.34199	0.01	0.092563	down	coding	856
213241_at	PLXNC1	NM_005761	plexin C1	12.5363	12.0143	2.50638	1.43599	0.010001	0.129888	up	coding	857
211783_s_at	MTA1	NM_001203258	metastasis associated 1	10.149	10.5534	-2.50622	-1.32362	0.010005	0.092563	down	coding	858
221349_at	VPREB1	NM_007128	pre-B lymphocyte 1	4.83848	5.33352	-2.50551	-1.40936	0.010028	0.092563	down	coding	859
218866_s_at	POLR3K	NM_016310	polymerase (RNA) III (DNA directed) polypeptide K, 12.3 kDa	9.19265	9.52504	-2.50534	-1.2591	0.010034	0.092563	down	coding	860
216316_x_at	OTTHUMG00000161327	---	NULL	8.17428	6.98054	2.50458	2.28745	0.010052	0.129888	up	coding	861
213563_s_at	TUBGCP2	NM_001256617	tubulin, gamma complex associated protein 2	7.54757	7.34058	2.50453	1.15427	0.010053	0.129888	up	coding	862
222239_s_at	INTS6	NM_001039937	integrator complex subunit 6	9.10952	8.7035	2.50432	1.32502	0.010059	0.129888	up	coding	863
205403_at	IL1R2	NM_001261419	interleukin 1 receptor, type II	11.2241	10.4827	2.5042	1.67186	0.010064	0.129888	up	coding	864
203894_at	TUBG2	NM_016437	tubulin, gamma 2	6.82944	7.33347	-2.50416	-1.41817	0.010065	0.092563	down	coding	865
213945_s_at	NUP210	NM_024923	nucleoporin 210kDa	10.9098	11.2774	-2.5041	-1.29018	0.010067	0.092563	down	coding	866
202773_s_at	SFSWAP	NM_001261411	splicing factor, suppressor of white-apricot homolog (Drosophila)	11.1309	11.4818	-2.5041	-1.27537	0.010067	0.092563	down	coding	867
213586_at	CDKN2D	NM_001800	cyclin-dependent kinase inhibitor 2D (p19, inhibits CDK4)	8.72633	8.18283	2.50395	1.4575	0.010071	0.129888	up	coding	868
202342_s_at	TRIM2	NM_001130067	tripartite motif containing 2	4.54836	5.31088	-2.50385	-1.69645	0.010074	0.092563	down	coding	869
217805_at	ILF3	NM_001137673	interleukin enhancer binding factor 3, 90kDa	9.00772	9.33232	-2.50316	-1.25232	0.010092	0.092563	down	coding	870
221368_at	NEU2	NM_005383	sialidase 2 (cytosolic sialidase)	5.58174	5.35698	2.50304	1.16858	0.010094	0.129888	up	coding	871
217998_at	PHLDA1	NM_007350	pleckstrin homology-like domain, family A, member 1	3.70108	4.28636	-2.50298	-1.50032	0.010095	0.092563	down	coding	872
207818_s_at	HTR7	NM_000872	5-hydroxytryptamine (serotonin) receptor 7, adenylate cyclase-coupled	3.58736	3.30113	2.50296	1.21945	0.010095	0.129888	up	coding	873
217167_x_at	GK	NM_000167	glycerol kinase	10.0975	8.73348	2.50254	2.57407	0.010108	0.129888	up	coding	874
204624_at	ATP7B	NM_000053	ATPase, Cu++ transporting, beta polypeptide	5.78204	5.26134	2.50252	1.43465	0.010108	0.129888	up	coding	875
213620_s_at	ICAM2	NM_000873	intercellular adhesion molecule 2	11.8951	12.1996	-2.50239	-1.23499	0.010112	0.092563	down	coding	876
202266_at	TDP2	NM_016614	tyrosyl-DNA phosphodiesterase 2	11.5883	11.1821	2.50175	1.32518	0.010129	0.129888	up	coding	877
222126_at	AGFG2	NM_006076	ArfGAP with FG repeats 2	8.90644	9.45248	-2.50051	-1.46008	0.010166	0.092563	down	coding	878
216245_at	IL1RN	NM_000577	interleukin 1 receptor antagonist	7.35661	6.47231	2.50003	1.84587	0.010178	0.129888	up	coding	879
204714_s_at	F5	NM_000130	coagulation factor V (proaccelerin, labile factor)	10.018	8.95454	2.49984	2.08987	0.010185	0.129888	up	coding	880
216111_x_at	PMS2P3	NM_001003686	postmeiotic segregation increased 2 pseudogene 3	8.82614	9.13999	-2.49948	-1.24302	0.010194	0.092563	down	coding	881
206348_s_at	PDK3	NM_001142386	pyruvate dehydrogenase kinase, isozyme 3	9.52939	8.95564	2.49892	1.48839	0.010209	0.129888	up	coding	882
218498_s_at	ERO1L	NM_014584	ERO1-like (S. cerevisiae)	10.2898	9.74915	2.49762	1.45462	0.010247	0.129888	up	coding	883
218381_s_at	U2AF2	NM_001012478	U2 small nuclear RNA auxiliary factor 2	10.4542	10.6991	-2.49757	-1.18502	0.010248	0.092563	down	coding	884
213666_at	2017-09-06	NM_015129	septin 6	10.9107	11.3988	-2.49746	-1.40263	0.010252	0.092563	down	coding	885
219152_at	PODXL2	NM_015720	podocalyxin-like 2	6.70002	6.48648	2.49742	1.15953	0.010253	0.129888	up	coding	886
202254_at	SIPA1L1	NM_015556	signal-induced proliferation-associated 1 like 1	9.10808	8.7511	2.49633	1.28074	0.010286	0.129888	up	coding	887
209526_s_at	HDGFRP3	NM_016073	hepatoma-derived growth factor, related protein 3	7.5701	6.92446	2.49567	1.56442	0.010305	0.129888	up	coding	888
219209_at	IFIH1	NM_022168	interferon induced with helicase C domain 1	10.4203	9.64252	2.49489	1.71452	0.010326	0.129888	up	coding	889
203606_at	NDUFS6	NM_004553	NADH dehydrogenase (ubiquinone) Fe-S protein 6, 13kDa (NADH-coenzyme Q reductase)	12.1891	12.3866	-2.49452	-1.14677	0.010337	0.092563	down	coding	890
212234_at	ASXL1	NM_001164603	additional sex combs like 1 (Drosophila)	10.2239	10.6584	-2.49407	-1.35149	0.010349	0.092563	down	coding	891
219210_s_at	RAB8B	NM_016530	RAB8B, member RAS oncogene family	10.2071	9.59194	2.49401	1.53168	0.01035	0.129888	up	coding	892
215218_s_at	WDR62	NM_001083961	WD repeat domain 62	6.53007	6.32205	2.49355	1.1551	0.010361	0.129888	up	coding	893
213294_at	EIF2AK2	NM_001135651	eukaryotic translation initiation factor 2-alpha kinase 2	10.4383	9.89263	2.49353	1.45975	0.010362	0.129888	up	coding	894
216942_s_at	CD58	NM_001144822	CD58 molecule	8.45255	7.54406	2.49296	1.87708	0.010377	0.129888	up	coding	895
221492_s_at	ATG3	NM_022488	autophagy related 3	11.7975	11.2042	2.49265	1.50866	0.010385	0.129888	up	coding	896
215127_s_at	RBMS1	NM_002897	RNA binding motif, single stranded interacting protein 1	11.8217	11.4532	2.4911	1.29106	0.010432	0.129888	up	coding	897
209552_at	PAX8	NM_003466	paired box 8	6.1449	5.73776	2.49077	1.32605	0.010439	0.129888	up	coding	898
35820_at	GM2A	NM_000405	GM2 ganglioside activator	11.4204	10.8267	2.4907	1.50912	0.010441	0.129888	up	coding	899
201992_s_at	KIF5B	NM_004521	kinesin family member 5B	7.42506	6.8777	2.49024	1.46141	0.010454	0.129888	up	coding	900
218734_at	NAA40	NM_024771	N(alpha)-acetyltransferase 40, NatD catalytic subunit, homolog (S. cerevisiae)	5.06197	5.37329	-2.49018	-1.24084	0.010455	0.092563	down	coding	901
210034_s_at	RPL5	NM_000969	ribosomal protein L5	6.69888	7.14693	-2.4898	-1.36419	0.010465	0.092563	down	coding	902
202217_at	C21orf33	NM_004649	chromosome 21 open reading frame 33	11.5322	11.8022	-2.4882	-1.20578	0.010508	0.092563	down	coding	903
221427_s_at	CCNL2	NM_001039577	cyclin L2	10.3547	10.6726	-2.48774	-1.24648	0.010522	0.092563	down	coding	904
218059_at	ZNF706	NM_001042510	zinc finger protein 706	10.9972	11.2864	-2.48743	-1.22198	0.010529	0.092563	down	coding	905
213315_x_at	CXorf40A	NM_001013845	chromosome X open reading frame 40A	9.72422	9.9495	-2.48645	-1.169	0.010555	0.092563	down	coding	906
209368_at	EPHX2	NM_001256482	epoxide hydrolase 2, cytoplasmic	8.76395	9.52413	-2.48627	-1.6937	0.010559	0.092563	down	coding	907
215376_at	---	---	---	8.33407	8.98145	-2.48598	-1.56632	0.010566	0.092563	down	coding	908
203505_at	ABCA1	NM_005502	ATP-binding cassette, sub-family A (ABC1), member 1	7.94332	7.05914	2.48574	1.84573	0.010574	0.129888	up	coding	909
209582_s_at	CD200	NM_001004196	CD200 molecule	5.66975	6.27689	-2.48503	-1.52324	0.010592	0.092563	down	coding	910
210049_at	SERPINC1	NM_000488	serpin peptidase inhibitor, clade C (antithrombin), member 1	4.43793	4.05136	2.48416	1.30728	0.010616	0.129888	up	coding	911
201076_at	NHP2L1	NM_001003796	NHP2 non-histone chromosome protein 2-like 1 (S. cerevisiae)	11.9784	12.3315	-2.48404	-1.27726	0.010619	0.092563	down	coding	912
207855_s_at	CLCC1	NM_001048210	chloride channel CLIC-like 1	7.13219	7.58754	-2.48375	-1.37112	0.01063	0.092563	down	coding	913
209658_at	CDC16	NM_001078645	cell division cycle 16	10.7051	11.0141	-2.48347	-1.23887	0.01064	0.092563	down	coding	914
214147_at	MROH7	NM_001039464	maestro heat-like repeat family member 7	4.45978	4.66555	-2.48331	-1.1533	0.010645	0.092563	down	coding	915
205159_at	CSF2RB	NM_000395	colony stimulating factor 2 receptor, beta, low-affinity (granulocyte-macrophage)	12.2183	11.7976	2.48265	1.33861	0.010664	0.129888	up	coding	916
207618_s_at	BCS1L	NM_001079866	BC1 (ubiquinol-cytochrome c reductase) synthesis-like	9.43859	9.81193	-2.48264	-1.29536	0.010664	0.092563	down	coding	917
212691_at	NUP188	NM_015354	nucleoporin 188kDa	8.3315	8.71285	-2.48122	-1.30256	0.010703	0.092563	down	coding	918
219559_at	SLC17A9	NM_022082	solute carrier family 17, member 9	6.76928	7.21956	-2.48098	-1.36631	0.010711	0.092563	down	coding	919
213627_at	MAGED2	NM_014599	melanoma antigen family D, 2	9.43667	9.69817	-2.48034	-1.19872	0.010728	0.092563	down	coding	920
214590_s_at	UBE2D1	NM_001204880	ubiquitin-conjugating enzyme E2D 1	10.3852	9.54084	2.47987	1.79549	0.01074	0.129888	up	coding	921
219563_at	LINC00341	NM_024633	long intergenic non-protein coding RNA 341	10.9444	11.2725	-2.47909	-1.25534	0.010763	0.092563	down	coding	922
203117_s_at	PAN2	NM_001127460	PAN2 poly(A) specific ribonuclease subunit homolog (S. cerevisiae)	9.52182	9.91574	-2.47846	-1.31396	0.010784	0.092563	down	coding	923
207053_at	SLC8A1	NM_001112800	solute carrier family 8 (sodium/calcium exchanger), member 1	5.10491	4.2349	2.47722	1.82767	0.010821	0.129888	up	coding	924
202757_at	NELFB	NM_015456	negative elongation factor complex member B	9.18739	9.51172	-2.47659	-1.25209	0.010839	0.092563	down	coding	925
221535_at	LSG1	NM_018385	large subunit GTPase 1 homolog (S. cerevisiae)	9.74795	10.288	-2.47585	-1.45407	0.010858	0.092563	down	coding	926
208907_s_at	MRPS18B	NM_014046	mitochondrial ribosomal protein S18B	9.97759	10.4136	-2.47526	-1.35284	0.010877	0.092563	down	coding	927
217355_at	OTTHUMG00000150600	---	NULL	4.56321	4.2067	2.47522	1.28032	0.010878	0.129888	up	coding	928
213833_x_at	NOP16	NM_001256539	NOP16 nucleolar protein	12.2094	12.4253	-2.47512	-1.16142	0.010881	0.092563	down	coding	929
208268_at	ADAM28	NM_014265	ADAM metallopeptidase domain 28	9.78675	10.5417	-2.47424	-1.68752	0.010906	0.092563	down	coding	930
207922_s_at	MAEA	NM_001017405	macrophage erythroblast attacher	11.1735	10.9103	2.47416	1.20015	0.010909	0.129888	up	coding	931
206735_at	CHRNA4	NM_000744	cholinergic receptor, nicotinic, alpha 4 (neuronal)	5.69549	5.45235	2.47412	1.18356	0.01091	0.129888	up	coding	932
201298_s_at	MOB1A	NM_018221	MOB kinase activator 1A	11.7127	11.1122	2.47376	1.51625	0.01092	0.129888	up	coding	933
207601_at	SULT1B1	NM_014465	sulfotransferase family, cytosolic, 1B, member 1	9.16646	8.04623	2.47372	2.17381	0.010922	0.129888	up	coding	934
218337_at	FAM160B2	NM_022749	family with sequence similarity 160, member B2	8.08928	8.38189	-2.47368	-1.22486	0.010923	0.092563	down	coding	935
222311_s_at	SCAF4	NM_001145444	SR-related CTD-associated factor 4	10.1232	10.4797	-2.47347	-1.28028	0.01093	0.092563	down	coding	936
219108_x_at	DDX27	NM_001007559	DEAD (Asp-Glu-Ala-Asp) box polypeptide 27	10.1675	10.549	-2.4734	-1.30268	0.010932	0.092563	down	coding	937
215354_s_at	PELP1	NM_001278241	proline, glutamate and leucine rich protein 1	9.35617	9.88383	-2.473	-1.44159	0.010945	0.092563	down	coding	938
222298_at	---	---	---	4.24166	4.7384	-2.47063	-1.41102	0.011014	0.092563	down	coding	939
218149_s_at	ZNF395	NM_018660	zinc finger protein 395	10.7518	11.3972	-2.47042	-1.56412	0.011021	0.092563	down	coding	940
216525_x_at	PMS2P3	NM_001003686	postmeiotic segregation increased 2 pseudogene 3	9.23283	9.59507	-2.47021	-1.28542	0.011029	0.092563	down	coding	941
213634_s_at	TRMU	NM_001008568	tRNA 5-methylaminomethyl-2-thiouridylate methyltransferase	7.69513	7.91758	-2.46987	-1.16671	0.01104	0.092563	down	coding	942
207387_s_at	GK	NM_000167	glycerol kinase	11.7742	10.7895	2.46981	1.97883	0.011042	0.129888	up	coding	943
37860_at	ZNF337	NM_015655	zinc finger protein 337	9.69572	10.1325	-2.46965	-1.35354	0.011046	0.092563	down	coding	944
211226_at	GALR2	NM_003857	galanin receptor 2	6.21356	5.98844	2.46949	1.16887	0.011052	0.129888	up	coding	945
218958_at	C19orf60	NM_001100418	chromosome 19 open reading frame 60	9.8428	10.1587	-2.46949	-1.24481	0.011053	0.092563	down	coding	946
216330_s_at	POU6F1	NM_002702	POU class 6 homeobox 1	6.66091	7.22608	-2.46802	-1.47956	0.011102	0.092563	down	coding	947
210773_s_at	FPR2	NM_001005738	formyl peptide receptor 2	9.68241	8.69668	2.46798	1.98032	0.011103	0.129888	up	coding	948
214251_s_at	NUMA1	NM_006185	nuclear mitotic apparatus protein 1	8.37112	8.77307	-2.46766	-1.32129	0.011114	0.092563	down	coding	949
213540_at	HSD17B8	NM_014234	hydroxysteroid (17-beta) dehydrogenase 8	9.32228	9.84252	-2.46749	-1.4342	0.011119	0.092563	down	coding	950
205702_at	PHTF1	NM_006608	putative homeodomain transcription factor 1	9.18278	8.23319	2.46715	1.93133	0.011128	0.129888	up	coding	951
87100_at	ABHD2	NM_007011	abhydrolase domain containing 2	7.56916	6.8757	2.46699	1.61715	0.011134	0.129888	up	coding	952
218744_s_at	PACSIN3	NM_001184974	protein kinase C and casein kinase substrate in neurons 3	5.14014	4.8615	2.46688	1.21305	0.011137	0.129888	up	coding	953
216300_x_at	RARA	NM_000964	retinoic acid receptor, alpha	8.39344	7.85735	2.46675	1.45004	0.011141	0.129888	up	coding	954
203958_s_at	ZBTB40	NM_001083621	zinc finger and BTB domain containing 40	7.79205	8.30588	-2.46668	-1.42783	0.011143	0.092563	down	coding	955
216657_at	ATXN3	NM_001024631	ataxin 3	3.0001	3.25165	-2.46658	-1.19048	0.011145	0.092563	down	coding	956
210944_s_at	CAPN3	NM_000070	calpain 3, (p94)	10.1406	10.3958	-2.46607	-1.1935	0.011162	0.092563	down	coding	957
200646_s_at	NUCB1	NM_006184	nucleobindin 1	9.96466	9.16816	2.46525	1.73688	0.011188	0.129888	up	coding	958
209444_at	RAP1GDS1	NM_001100426	RAP1, GTP-GDP dissociation stimulator 1	10.0326	10.2959	-2.4648	-1.20019	0.0112	0.092563	down	coding	959
207565_s_at	MR1	NM_001194999	major histocompatibility complex, class I-related	9.10258	8.32909	2.46389	1.70939	0.011227	0.129888	up	coding	960
214009_at	MSL3	NM_001193270	male-specific lethal 3 homolog (Drosophila)	8.10661	7.6199	2.46384	1.40124	0.01123	0.129888	up	coding	961
204699_s_at	DIEXF	NM_014388	digestive organ expansion factor homolog (zebrafish)	8.23005	8.6091	-2.46378	-1.30048	0.011231	0.092563	down	coding	962
217631_at	GTPBP4	NM_012341	GTP binding protein 4	7.65771	8.05593	-2.46376	-1.31788	0.011232	0.092563	down	coding	963
201421_s_at	WDR77	NM_024102	WD repeat domain 77	9.86687	10.2687	-2.46374	-1.32116	0.011233	0.092563	down	coding	964
215158_s_at	DEDD	NM_001039711	death effector domain containing	11.9012	11.7295	2.46333	1.12638	0.011246	0.129888	up	coding	965
213444_at	ZNF862	NM_001099220	zinc finger protein 862	10.2091	10.525	-2.46264	-1.24478	0.011266	0.092563	down	coding	966
210212_x_at	CMC4	NM_001018024	C-x(9)-C motif containing 4 homolog (S. cerevisiae)	10.8595	11.2077	-2.46253	-1.27291	0.011268	0.092563	down	coding	967
204500_s_at	AGTPBP1	NM_015239	ATP/GTP binding protein 1	10.4853	10.0506	2.46243	1.35157	0.011272	0.129888	up	coding	968
208498_s_at	ACTG1P4	NM_000699	actin, gamma 1 pseudogene 4	9.85801	10.1817	-2.46235	-1.25152	0.011273	0.092563	down	coding	969
204423_at	MKLN1	NM_001145354	muskelin 1, intracellular mediator containing kelch motifs	9.64357	9.24504	2.46232	1.31817	0.011275	0.129888	up	coding	970
214748_at	N4BP2L2	NM_001278432	NEDD4 binding protein 2-like 2	9.25831	8.57616	2.46159	1.60453	0.011296	0.129888	up	coding	971
210881_s_at	IGF2	NM_000612	insulin-like growth factor 2 (somatomedin A)	5.46915	5.25371	2.4614	1.16106	0.0113	0.129888	up	coding	972
207776_s_at	CACNB2	NM_000724	calcium channel, voltage-dependent, beta 2 subunit	9.5569	10.0762	-2.46085	-1.43321	0.011316	0.092563	down	coding	973
40837_at	TLE2	NM_001144761	transducin-like enhancer of split 2 (E(sp1) homolog, Drosophila)	8.04712	8.77482	-2.46047	-1.656	0.011327	0.092563	down	coding	974
206440_at	LIN7A	NM_004664	lin-7 homolog A (C. elegans)	9.0701	7.9588	2.46016	2.1604	0.011337	0.129888	up	coding	975
204493_at	BID	NM_001196	BH3 interacting domain death agonist	10.2354	9.54817	2.46016	1.6102	0.011337	0.129888	up	coding	976
204305_at	MIPEP	NM_005932	mitochondrial intermediate peptidase	6.74957	7.2573	-2.45963	-1.42181	0.011353	0.092563	down	coding	977
204217_s_at	RTN2	NM_005619	reticulon 2	7.65464	7.03301	2.45934	1.53862	0.011363	0.129888	up	coding	978
217338_at	KRT19P2	NR_036685	keratin 19 pseudogene 2	3.88609	3.6155	2.45917	1.2063	0.011368	0.129888	up	coding	979
219883_at	TEX40	NM_001039496	testis expressed 40	5.87692	5.58504	2.45817	1.22423	0.011396	0.129888	up	coding	980
222193_at	C2orf43	NM_021925	chromosome 2 open reading frame 43	8.39428	8.78019	-2.45797	-1.30669	0.011401	0.092563	down	coding	981
221657_s_at	ASB6	NM_001202403	ankyrin repeat and SOCS box containing 6	7.8662	8.07682	-2.45753	-1.15719	0.011412	0.092563	down	coding	982
64883_at	MOSPD2	NM_001177475	motile sperm domain containing 2	8.06439	7.40189	2.45642	1.58282	0.011445	0.129888	up	coding	983
207500_at	CASP5	NM_001136109	caspase 5, apoptosis-related cysteine peptidase	9.56132	7.58736	2.45572	3.92846	0.011468	0.129888	up	coding	984
204553_x_at	INPP4A	NM_001134224	inositol polyphosphate-4-phosphatase, type I, 107kDa	8.2539	8.00529	2.4557	1.18806	0.011468	0.129888	up	coding	985
204470_at	CXCL1	NM_001511	chemokine (C-X-C motif) ligand 1 (melanoma growth stimulating activity, alpha)	8.69231	7.96166	2.45538	1.65939	0.011477	0.129888	up	coding	986
203275_at	IRF2	NM_002199	interferon regulatory factor 2	11.8468	11.5459	2.45473	1.23184	0.011495	0.129888	up	coding	987
215583_at	TMEM63A	NM_014698	transmembrane protein 63A	7.74781	8.11567	-2.45415	-1.29044	0.011512	0.092563	down	coding	988
212501_at	CEBPB	NM_005194	CCAAT/enhancer binding protein (C/EBP), beta	12.8365	12.4656	2.45326	1.29318	0.01154	0.129888	up	coding	989
202644_s_at	TNFAIP3	NM_001270507	tumor necrosis factor, alpha-induced protein 3	10.487	10.0763	2.45298	1.32935	0.011549	0.129888	up	coding	990
206464_at	BMX	NM_001721	BMX non-receptor tyrosine kinase	8.35361	7.0167	2.45289	2.5261	0.011553	0.129888	up	coding	991
216621_at	---	---	---	7.84268	7.3477	2.45273	1.4093	0.011558	0.129888	up	coding	992
217277_at	---	---	---	4.54723	4.26535	2.45247	1.21577	0.011567	0.129888	up	coding	993
206028_s_at	MERTK	NM_006343	c-mer proto-oncogene tyrosine kinase	6.53519	5.73657	2.45226	1.73943	0.011572	0.129888	up	coding	994
204014_at	DUSP4	NM_001394	dual specificity phosphatase 4	6.18176	7.02193	-2.45189	-1.79026	0.011584	0.092563	down	coding	995
214760_at	ZNF337	NM_015655	zinc finger protein 337	8.84249	9.27149	-2.45173	-1.3463	0.01159	0.092563	down	coding	996
206470_at	PLXNC1	NM_005761	plexin C1	8.43693	7.58893	2.45068	1.8	0.011619	0.129888	up	coding	997
203459_s_at	VPS16	NM_022575	vacuolar protein sorting 16 homolog (S. cerevisiae)	11.3733	11.6086	-2.45042	-1.17712	0.011629	0.092563	down	coding	998
209992_at	PFKFB2	NM_001018053	6-phosphofructo-2-kinase/fructose-2,6-biphosphatase 2	6.90319	5.66157	2.45031	2.36463	0.011634	0.129888	up	coding	999
201668_x_at	MARCKS	NM_002356	myristoylated alanine-rich protein kinase C substrate	8.30755	7.66259	2.44983	1.5637	0.01165	0.129888	up	coding	1000
215977_x_at	GK	NM_000167	glycerol kinase	10.1789	8.8451	2.44938	2.52061	0.011663	0.129888	up	coding	1001
205750_at	BPHL	NM_004332	biphenyl hydrolase-like (serine hydrolase)	6.57726	6.97677	-2.44923	-1.31906	0.011667	0.092563	down	coding	1002
204668_at	RNF24	NM_001134337	ring finger protein 24	9.30868	8.35459	2.44898	1.93736	0.011675	0.129888	up	coding	1003
200798_x_at	MCL1	NM_001197320	myeloid cell leukemia sequence 1 (BCL2-related)	11.9418	11.52	2.44884	1.33952	0.011679	0.129888	up	coding	1004
209327_s_at	NOP16	NM_001256539	NOP16 nucleolar protein	12.3253	12.5664	-2.44802	-1.1819	0.011704	0.092563	down	coding	1005
220465_at	CEBPA-AS1	NM_024988	CEBPA antisense RNA 1 (head to head)	7.36621	7.75016	-2.44771	-1.30491	0.011714	0.092563	down	coding	1006
212313_at	CHMP7	NM_152272	charged multivesicular body protein 7	11.1354	11.6394	-2.44768	-1.41812	0.011715	0.092563	down	coding	1007
220526_s_at	MRPL20	NM_017971	mitochondrial ribosomal protein L20	12.1712	12.3944	-2.44742	-1.16732	0.011723	0.092563	down	coding	1008
209559_at	HIP1R	NM_003959	huntingtin interacting protein 1 related	7.15206	7.68694	-2.44672	-1.44882	0.011749	0.092563	down	coding	1009
213216_at	OTUD3	NM_015207	OTU domain containing 3	8.27366	8.68945	-2.44667	-1.33403	0.011751	0.092563	down	coding	1010
215955_x_at	ARHGAP26	NM_001135608	Rho GTPase activating protein 26	9.41055	8.73609	2.44664	1.59601	0.011753	0.129888	up	coding	1011
209880_s_at	SELPLG	NM_001206609	selectin P ligand	10.847	10.4956	2.44621	1.27583	0.011767	0.129888	up	coding	1012
221200_at	ERVK3-2	---	endogenous retrovirus group K3, member 2	6.58551	5.74984	2.44606	1.78468	0.011772	0.129888	up	coding	1013
209659_s_at	CDC16	NM_001078645	cell division cycle 16	11.3044	11.6744	-2.44566	-1.29235	0.011787	0.092563	down	coding	1014
222064_s_at	AARSD1	NM_001136042	alanyl-tRNA synthetase domain containing 1	7.58013	7.94657	-2.44545	-1.28917	0.011794	0.092563	down	coding	1015
219826_at	ZNF419	NM_001098491	zinc finger protein 419	9.13988	9.64758	-2.44511	-1.42178	0.011807	0.092563	down	coding	1016
218552_at	ECHDC2	NM_001198961	enoyl CoA hydratase domain containing 2	10.28	10.8842	-2.44366	-1.52019	0.011852	0.092563	down	coding	1017
214229_at	DNAH17	NM_003727	dynein, axonemal, heavy chain 17	10.551	9.81649	2.4435	1.66383	0.011858	0.129888	up	coding	1018
202713_s_at	KIAA0391	NM_001256678	KIAA0391	10.7233	11.0637	-2.44309	-1.26611	0.011876	0.092563	down	coding	1019
218533_s_at	UCKL1	NM_001193379	uridine-cytidine kinase 1-like 1	9.22679	9.58618	-2.44281	-1.28289	0.011886	0.092563	down	coding	1020
204751_x_at	DSC2	NM_004949	desmocollin 2	6.83228	5.24723	2.44268	3.0002	0.011889	0.129888	up	coding	1021
46665_at	SEMA4C	NM_017789	sema domain, immunoglobulin domain (Ig), transmembrane domain (TM) and short cytoplasmic domain, (semaphorin) 4C	7.81603	8.40905	-2.44244	-1.5084	0.011897	0.092563	down	coding	1022
216995_x_at	MKRN2	NM_001271707	makorin ring finger protein 2	6.44409	6.17997	2.442	1.20091	0.011912	0.129888	up	coding	1023
205647_at	RAD52	NM_134422	RAD52 homolog (S. cerevisiae)	10.7199	11.0789	-2.44174	-1.28254	0.011919	0.092563	down	coding	1024
204757_s_at	C2CD2L	NM_014807	C2CD2-like	10.6514	10.9206	-2.44171	-1.20507	0.01192	0.092563	down	coding	1025
210190_at	STX11	NM_003764	syntaxin 11	8.79202	7.99504	2.44146	1.73746	0.011925	0.129888	up	coding	1026
210847_x_at	TNFRSF25	NM_001039664	tumor necrosis factor receptor superfamily, member 25	7.69898	8.2814	-2.44136	-1.49737	0.011929	0.092563	down	coding	1027
203497_at	MED1	NM_004774	mediator complex subunit 1	9.8759	10.1617	-2.44133	-1.21907	0.011929	0.092563	down	coding	1028
209429_x_at	EIF2B4	NM_001034116	eukaryotic translation initiation factor 2B, subunit 4 delta, 67kDa	10.6374	10.9113	-2.44125	-1.20906	0.011933	0.092563	down	coding	1029
203985_at	ZNF212	NM_012256	zinc finger protein 212	10.4076	10.7863	-2.44017	-1.30021	0.011968	0.092563	down	coding	1030
210916_s_at	CD44	NM_000610	CD44 molecule (Indian blood group)	10.7632	10.3541	2.43849	1.32785	0.012022	0.129888	up	coding	1031
212505_s_at	MAU2	NM_015329	MAU2 chromatid cohesion factor homolog (C. elegans)	10.0712	9.79624	2.43832	1.20996	0.012026	0.129888	up	coding	1032
202334_s_at	UBE2B	NM_003337	ubiquitin-conjugating enzyme E2B	10.6706	10.2557	2.43778	1.33321	0.012045	0.129888	up	coding	1033
218107_at	WDR26	NM_001115113	WD repeat domain 26	11.2813	11.0405	2.43775	1.18161	0.012047	0.129888	up	coding	1034
204376_at	VPRBP	NM_001171904	Vpr (HIV-1) binding protein	7.65682	8.32091	-2.43773	-1.58457	0.012048	0.092563	down	coding	1035
210592_s_at	SAT1	NM_002970	spermidine/spermine N1-acetyltransferase 1	13.0633	12.6808	2.43742	1.30367	0.012056	0.129888	up	coding	1036
209238_at	STX3	NM_001178040	syntaxin 3	11.6576	10.9954	2.43686	1.58247	0.012073	0.129888	up	coding	1037
206352_s_at	PEX10	NM_002617	peroxisomal biogenesis factor 10	10.574	10.8039	-2.43685	-1.17273	0.012073	0.092563	down	coding	1038
203668_at	MAN2C1	NM_001256494	mannosidase, alpha, class 2C, member 1	8.3834	8.90319	-2.43675	-1.43375	0.012076	0.092563	down	coding	1039
31845_at	ELF4	NM_001127197	E74-like factor 4 (ets domain transcription factor)	11.2498	10.827	2.4366	1.34055	0.01208	0.129888	up	coding	1040
210789_x_at	CEACAM3	NM_001277163	carcinoembryonic antigen-related cell adhesion molecule 3	10.6296	9.72341	2.43598	1.87407	0.0121	0.129888	up	coding	1041
214309_s_at	---	---	---	9.51907	10.1027	-2.43561	-1.4986	0.012115	0.092563	down	coding	1042
203380_x_at	SRSF5	NM_001039465	serine/arginine-rich splicing factor 5	12.2199	12.5263	-2.43557	-1.23664	0.012116	0.092563	down	coding	1043
215630_at	---	---	---	8.08237	8.5811	-2.43552	-1.41298	0.012118	0.092563	down	coding	1044
207645_s_at	CHD1L	NM_001256336	chromodomain helicase DNA binding protein 1-like	7.1943	7.56238	-2.43525	-1.29063	0.012127	0.092563	down	coding	1045
218874_s_at	ATAT1	NM_001031722	alpha tubulin acetyltransferase 1	6.36325	6.81177	-2.43506	-1.36464	0.012134	0.092563	down	coding	1046
218274_s_at	ANKZF1	NM_001042410	ankyrin repeat and zinc finger domain containing 1	10.8177	11.176	-2.43443	-1.28191	0.012153	0.092563	down	coding	1047
202910_s_at	CD97	NM_001025160	CD97 molecule	10.4128	9.83592	2.43433	1.49167	0.012155	0.129888	up	coding	1048
220612_at	---	---	---	6.1085	6.72117	-2.43425	-1.52909	0.012158	0.092563	down	coding	1049
209841_s_at	LRRN3	NM_001099658	leucine rich repeat neuronal 3	9.41963	10.4736	-2.43405	-2.07622	0.012164	0.092563	down	coding	1050
211087_x_at	MAPK14	NM_001315	mitogen-activated protein kinase 14	10.4561	9.64715	2.43387	1.75196	0.012168	0.129888	up	coding	1051
212684_at	ZNF3	NM_001278284	zinc finger protein 3	9.46078	9.98098	-2.43322	-1.43414	0.012184	0.092563	down	coding	1052
213054_at	HAUS5	NM_015302	HAUS augmin-like complex, subunit 5	9.27897	9.80102	-2.43319	-1.436	0.012185	0.092563	down	coding	1053
213479_at	NPTX2	NM_002523	neuronal pentraxin II	4.07591	4.58423	-2.43294	-1.42239	0.012192	0.092563	down	coding	1054
206031_s_at	USP5	NM_001098536	ubiquitin specific peptidase 5 (isopeptidase T)	7.38574	7.70366	-2.43241	-1.24653	0.012211	0.092563	down	coding	1055
201412_at	LRP10	NM_014045	low density lipoprotein receptor-related protein 10	12.3409	11.8996	2.43201	1.35789	0.012224	0.129888	up	coding	1056
212467_at	DNAJC13	NM_015268	DnaJ (Hsp40) homolog, subfamily C, member 13	10.2656	10.0032	2.43172	1.19944	0.012232	0.129888	up	coding	1057
206209_s_at	CA4	NM_000717	carbonic anhydrase IV	8.73606	7.63109	2.43163	2.15094	0.012235	0.129888	up	coding	1058
216880_at	RAD51B	NM_002877	RAD51 homolog B (S. cerevisiae)	5.15377	5.94165	-2.43139	-1.72654	0.012242	0.092563	down	coding	1059
208541_x_at	TFAM	NM_001270782	transcription factor A, mitochondrial	8.60987	8.81951	-2.43141	-1.1564	0.012242	0.092563	down	coding	1060
207240_s_at	LHCGR	NM_000233	luteinizing hormone/choriogonadotropin receptor	3.10799	3.3675	-2.43099	-1.19707	0.012255	0.092563	down	coding	1061
220437_at	C19orf80	NM_018687	chromosome 19 open reading frame 80	6.1717	5.93896	2.43043	1.17507	0.012273	0.129888	up	coding	1062
206310_at	SPINK2	NM_001271718	serine peptidase inhibitor, Kazal type 2 (acrosin-trypsin inhibitor)	5.82389	6.7967	-2.42937	-1.96266	0.012309	0.092563	down	coding	1063
204800_s_at	DHRS12	NM_001031719	dehydrogenase/reductase (SDR family) member 12	10.1891	9.57939	2.42921	1.52593	0.012316	0.129888	up	coding	1064
201662_s_at	ACSL3	NM_004457	acyl-CoA synthetase long-chain family member 3	9.79623	9.35788	2.42913	1.35505	0.012319	0.129888	up	coding	1065
213003_s_at	KIAA0146	NM_001080394	KIAA0146	10.3404	9.69082	2.42896	1.56868	0.012326	0.129888	up	coding	1066
205210_at	TGFBRAP1	NM_001142621	transforming growth factor, beta receptor associated protein 1	8.22244	8.5461	-2.42883	-1.2515	0.012329	0.092563	down	coding	1067
203964_at	NMI	NM_004688	N-myc (and STAT) interactor	12.2453	11.7747	2.42878	1.38571	0.012331	0.129888	up	coding	1068
213718_at	RBM4	NM_001198843	RNA binding motif protein 4	9.86595	10.2825	-2.4285	-1.33474	0.012343	0.092563	down	coding	1069
212266_s_at	SRSF5	NM_001039465	serine/arginine-rich splicing factor 5	12.898	13.1828	-2.42844	-1.21826	0.012345	0.092563	down	coding	1070
209361_s_at	PCBP4	NM_001174100	poly(rC) binding protein 4	7.30234	7.68459	-2.42836	-1.30337	0.012348	0.092563	down	coding	1071
215731_s_at	MPHOSPH9	NM_022782	M-phase phosphoprotein 9	9.90047	10.4663	-2.4283	-1.48023	0.012349	0.092563	down	coding	1072
203782_s_at	POLRMT	NM_005035	polymerase (RNA) mitochondrial (DNA directed)	9.02624	9.49622	-2.42791	-1.38509	0.012362	0.092563	down	coding	1073
214436_at	FBXL2	NM_001171713	F-box and leucine-rich repeat protein 2	6.22493	6.51221	-2.42789	-1.22034	0.012363	0.092563	down	coding	1074
212393_at	SBF1	NM_002972	SET binding factor 1	8.27055	8.59998	-2.42723	-1.25652	0.012383	0.092563	down	coding	1075
214262_at	TRIP6	NM_003302	thyroid hormone receptor interactor 6	4.67698	4.4139	2.42714	1.20004	0.012386	0.129888	up	coding	1076
201678_s_at	C3orf37	NM_001006109	chromosome 3 open reading frame 37	10.9875	11.363	-2.4263	-1.29723	0.012415	0.092563	down	coding	1077
208454_s_at	CPQ	NM_016134	carboxypeptidase Q	9.97509	9.38621	2.4262	1.50408	0.012418	0.129888	up	coding	1078
214798_at	ATP2C2	NM_014861	ATPase, Ca++ transporting, type 2C, member 2	6.81218	7.25384	-2.42608	-1.35817	0.012422	0.092563	down	coding	1079
213572_s_at	SERPINB1	NM_030666	serpin peptidase inhibitor, clade B (ovalbumin), member 1	12.1071	11.7734	2.42513	1.26024	0.012454	0.129888	up	coding	1080
212080_at	KMT2A	NM_001197104	lysine (K)-specific methyltransferase 2A	10.66	11.0721	-2.42509	-1.33064	0.012455	0.092563	down	coding	1081
212063_at	CD44	NM_000610	CD44 molecule (Indian blood group)	12.5401	12.3628	2.42488	1.13079	0.012464	0.129888	up	coding	1082
220337_at	NGB	NM_021257	neuroglobin	6.90269	6.66156	2.42476	1.18192	0.012468	0.129888	up	coding	1083
202656_s_at	SERTAD2	NM_014755	SERTA domain containing 2	10.9928	11.3344	-2.4231	-1.2671	0.012522	0.092563	down	coding	1084
204080_at	TOE1	NM_025077	target of EGR1, member 1 (nuclear)	9.03326	9.311	-2.42262	-1.2123	0.012539	0.092563	down	coding	1085
220079_s_at	USP48	NM_001032730	ubiquitin specific peptidase 48	11.2012	11.4638	-2.42233	-1.19965	0.012548	0.092563	down	coding	1086
208575_at	HIST1H3A	NM_003529	histone cluster 1, H3a	5.12913	4.85722	2.42223	1.20741	0.01255	0.129888	up	coding	1087
206565_x_at	SMA4	NM_006780	glucuronidase, beta pseudogene	11.5832	10.5252	2.42213	2.082	0.012553	0.129888	up	coding	1088
217759_at	TRIM44	NM_017583	tripartite motif containing 44	10.4596	10.7392	-2.42151	-1.21386	0.012572	0.092563	down	coding	1089
206846_s_at	HDAC6	NM_006044	histone deacetylase 6	9.87198	10.139	-2.42112	-1.20332	0.012585	0.092563	down	coding	1090
213609_s_at	SEZ6L	NM_001184773	seizure related 6 homolog (mouse)-like	4.56956	5.25152	-2.42097	-1.60433	0.012589	0.092563	down	coding	1091
214526_x_at	PMS2P1	NM_005394	postmeiotic segregation increased 2 pseudogene 1	9.23095	9.5701	-2.42085	-1.26502	0.012593	0.092563	down	coding	1092
211709_s_at	CLEC11A	NM_002975	C-type lectin domain family 11, member A	5.99463	6.3265	-2.42041	-1.25865	0.012609	0.092563	down	coding	1093
202549_at	VAPB	NM_001195677	VAMP (vesicle-associated membrane protein)-associated protein B and C	8.04432	8.51806	-2.4202	-1.3887	0.012615	0.092563	down	coding	1094
218735_s_at	ZNF544	NM_014480	zinc finger protein 544	9.83196	10.3376	-2.42019	-1.41977	0.012616	0.092563	down	coding	1095
46142_at	LMF1	NM_022773	lipase maturation factor 1	8.19685	8.79926	-2.41957	-1.51825	0.012636	0.092563	down	coding	1096
219859_at	CLEC4E	NM_014358	C-type lectin domain family 4, member E	8.72272	8.00807	2.41907	1.64109	0.012652	0.129888	up	coding	1097
34406_at	PACS2	NM_001100913	phosphofurin acidic cluster sorting protein 2	8.27301	8.60913	-2.41878	-1.26236	0.012664	0.092563	down	coding	1098
211328_x_at	HFE	NM_000410	hemochromatosis	6.13262	5.83241	2.41811	1.23133	0.012687	0.129888	up	coding	1099
219329_s_at	ATRAID	NM_001170795	all-trans retinoic acid-induced differentiation factor	11.4638	11.6415	-2.41783	-1.13108	0.012697	0.092563	down	coding	1100
212914_at	CBX7	NM_175709	chromobox homolog 7	11.276	11.6767	-2.41686	-1.32021	0.012732	0.092563	down	coding	1101
209911_x_at	HIST1H2BD	NM_021063	histone cluster 1, H2bd	10.972	10.2398	2.41667	1.66109	0.01274	0.129888	up	coding	1102
221054_s_at	TCL6	NM_012468	T-cell leukemia/lymphoma 6 (non-protein coding)	5.67347	6.28013	-2.41628	-1.52273	0.012755	0.092563	down	coding	1103
209150_s_at	TM9SF1	NM_001014842	transmembrane 9 superfamily member 1	9.77163	9.47098	2.41611	1.23169	0.01276	0.129888	up	coding	1104
219341_at	CLN8	NM_001034061	ceroid-lipofuscinosis, neuronal 8 (epilepsy, progressive with mental retardation)	8.45762	9.00192	-2.41565	-1.45832	0.012777	0.092563	down	coding	1105
213159_at	PCNX	NM_014982	pecanex homolog (Drosophila)	10.4868	10.0733	2.41565	1.33195	0.012777	0.129888	up	coding	1106
220582_at	---	---	---	7.81295	8.31991	-2.41347	-1.42106	0.012853	0.092563	down	coding	1107
219949_at	LRRC2	NM_024512	leucine rich repeat containing 2	3.2832	3.7796	-2.41339	-1.41069	0.012856	0.092563	down	coding	1108
213459_at	RPL37A	NM_000998	ribosomal protein L37a	7.05836	7.62988	-2.41216	-1.48609	0.012897	0.092563	down	coding	1109
210615_at	NRP1	NM_001024628	neuropilin 1	4.01694	3.76116	2.41145	1.19398	0.012923	0.129888	up	coding	1110
210701_at	CFDP1	NM_006324	craniofacial development protein 1	5.7817	6.88077	-2.41112	-2.14217	0.012935	0.092563	down	coding	1111
206296_x_at	MAP4K1	NM_001042600	mitogen-activated protein kinase kinase kinase kinase 1	9.91309	10.5335	-2.41109	-1.53729	0.012936	0.092563	down	coding	1112
221311_x_at	LYRM2	NM_020466	LYR motif containing 2	8.56872	9.06233	-2.4108	-1.40796	0.012945	0.092563	down	coding	1113
205658_s_at	SNAPC4	NM_003086	small nuclear RNA activating complex, polypeptide 4, 190kDa	7.36516	7.65384	-2.41059	-1.22153	0.012953	0.092563	down	coding	1114
207801_s_at	RNF10	NM_014868	ring finger protein 10	11.5273	11.0896	2.41057	1.35446	0.012954	0.129888	up	coding	1115
214231_s_at	VWA8	NM_001009814	von Willebrand factor A domain containing 8	5.55828	6.0395	-2.40986	-1.39593	0.012974	0.092563	down	coding	1116
218660_at	DYSF	NM_001130455	dysferlin, limb girdle muscular dystrophy 2B (autosomal recessive)	12.2319	11.4041	2.40933	1.77502	0.012991	0.129888	up	coding	1117
215286_s_at	PHTF2	NM_001127357	putative homeodomain transcription factor 2	5.48373	5.98062	-2.40852	-1.41117	0.013018	0.092563	down	coding	1118
204562_at	IRF4	NM_001195286	interferon regulatory factor 4	7.91837	8.48857	-2.40846	-1.48473	0.01302	0.092563	down	coding	1119
201680_x_at	SRRT	NM_001128852	serrate RNA effector molecule homolog (Arabidopsis)	11.1053	11.3881	-2.40747	-1.21655	0.013054	0.092563	down	coding	1120
209600_s_at	ACOX1	NM_001185039	acyl-CoA oxidase 1, palmitoyl	11.0083	10.4752	2.40702	1.44707	0.013069	0.129888	up	coding	1121
221641_s_at	ACOT9	NM_001033583	acyl-CoA thioesterase 9	11.6366	11.1668	2.40703	1.38496	0.013069	0.129888	up	coding	1122
210673_x_at	NKX2-1	NM_001079668	NK2 homeobox 1	7.12064	6.93171	2.40672	1.13992	0.01308	0.129888	up	coding	1123
218524_at	E4F1	NM_004424	E4F transcription factor 1	9.10025	9.38268	-2.40639	-1.21624	0.01309	0.092563	down	coding	1124
205519_at	WDR76	NM_001167941	WD repeat domain 76	6.11185	6.53002	-2.4062	-1.33622	0.013097	0.092563	down	coding	1125
213643_s_at	INPP5B	NM_005540	inositol polyphosphate-5-phosphatase, 75kDa	6.63663	7.1144	-2.406	-1.39259	0.013104	0.092563	down	coding	1126
37028_at	PPP1R15A	NM_014330	protein phosphatase 1, regulatory subunit 15A	8.93225	8.39984	2.40571	1.44634	0.013113	0.129888	up	coding	1127
[truncated: 873 more rows]

## Sheet: GSE20262
Probe Set ID	Gene Symbol	Accession Number	Gene Description	Mean Signal of Group pharyngitis	Mean Signal of Group control	d Score	Fold Change	p-value	q-value	Gene Feature	Biotype	Rank
[truncated: 2,000 more rows]

[truncated: 2 more sheets: Known targets from databases, Total pharyngitis targets]
