# Supplementary material for: Relieving Sore Throat Formula Exerts a Therapeutic Effect on Pharyngitis through Immunoregulation and NF-κB Pathway
Source: Mediators Inflamm. 2020 May 15;2020:2929163. doi: 10.1155/2020/2929163 (PMC7245656; doi:10.1155/2020/2929163)
Supplement: Supplementary 6 — Supplementary Table 5. PPI data of interaction network. Supplementary materials and methods. (1) Data preparation and screening of active compounds. Composite compounds of each herb in RSTF were obtained from TCMSP (http://lsp.nwsuaf.edu.cn/tcmsp.php). The database includes chemicals, targets and drug-target networks, and associated drug-target-disease networks, as well as pharmacokinetic properties for natural compounds involving oral bioavailability, drug-likeness, intestinal epithelial permeability, blood-brain barrier, and aqueous solubility. Active compounds were selected by setting OB ≥ 30%, DL ≥ 0.18, Caco‐2 ≥ ‐0.4, and HL ≥ 4 as the threshold. (2) Prediction of drug targets for RSTF. The prediction of drug targets was performed as previously described. The in silico prediction models, SEA search tool (SEArch, http://sea.bkslab.org/), and STITCH 4.0 (Search Tool for Interacting Chemicals, http://stitch.embl.de/) were combined to predict the target profiles of active herbal compounds. (3) Collection of targets related to pharyngitis. Pharyngitis-related targets were obtained from two main sources: differentially expressed genes (DEGs) obtained from publicly available microarray data and disease-related databases. To identify the main DEGs between normal and pharyngitis-related specimens, microarray data GEO34205, GEO17732, and GEO20262 was gained from the Gene Expression Omnibus database (GEO, https://www.ncbi.nlm.nih.gov/geo/), and 2000 differential genes were analyzed by each microarray. (4) CPPI network construction. The putative RSTF-related target network and pharyngitis-related target network were constructed based on their interaction data. PPI data were imported from six currently available PPI databases, including the Biological General Repository for Interaction Datasets (BioGRID), the Biomolecular Interaction Network Database (BIND), the Molecular INTeraction Database (MINT), the Human Protein Reference Database (HPRD), and the Database of Interacti [file 2929163.f6.xlsx]

## Sheet: Datas of Interaction network 
PPI data of interaction network
	Gene name	Protein names	EC	LAC	BC	CC	NC	DC
1	ESR1	Estrogen receptor	0.156756	34.7726	374621	0.664465	486.206
2	NTRK1	High affinity nerve growth factor receptor	0.142382	38.0829	108723	0.599762	304.893
3	CUL3	Cullin-3	0.128189	42.7936	41358.6	0.568576	212.72
4	TP53	Cellular tumor antigen p53	0.117943	40.4778	54555.9	0.571158	201.984
5	COPS5	COP9 signalosome complex subunit 5	0.107211	40.6667	24454.8	0.548328	148.064
6	MCM2	DNA replication licensing factor MCM2	0.106706	38.04	24141.2	0.54086	142.577
7	CUL1	Cullin-1	0.105259	42.0505	18487.6	0.54086	140.373
8	NPM1	Nucleophosmin	0.102499	46.7732	15498.2	0.539314	132.051
9	CUL7	Cullin-7	0.10078	31.4472	19228	0.537393	124.671
10	CDK2	Cyclin-dependent kinase 2	0.0993182	35.15	20173.1	0.541831	121.607
11	OBSL1	Obscurin-like protein 1	0.0904881	29.3379	16991.8	0.529659	107.514
12	YWHAZ	14-3-3 protein zeta/delta	0.0870274	39.4921	17752.9	0.534348	109.843
13	VCAM1	Vascular cell adhesion protein 1	0.0870113	31.5918	8545.5	0.517845	85.5691
14	ITGA4	Integrin alpha-4	0.0864119	30.9562	11456.6	0.520345	86.4942
15	UBC	SUMO-conjugating enzyme UBC9	0.0837969	32.7917	32005.3	0.541831	121.666
16	RNF2	E3 ubiquitin-protein ligase RING2	0.0837287	27.9862	22049.7	0.533593	106.984
17	HSP90AA1	Heat shock protein HSP 90-alpha	0.0835804	35.6125	26475.1	0.546145	118.179
18	HNRNPA1	Heterogeneous nuclear ribonucleoprotein A1	0.0782279	40.7402	12422.1	0.525967	96.3326
19	VCP	Transitional endoplasmic reticulum ATPase	0.0770051	33.2851	17777.5	0.532839	92.0352
20	CUL2	Cullin-2	0.0767586	30.9657	7225.71	0.508081	68.4399
21	HSP90AB1	Heat shock protein HSP 90-beta	0.0757187	33.5198	15337.7	0.535676	88.8947
22	XPO1	Exportin-1	0.0751385	24.75	37188.5	0.543001	96.8619
23	HUWE1	E3 ubiquitin-protein ligase HUWE1	0.0745122	31.3812	12989.4	0.521965	81.8536
24	EED	Polycomb protein EED	0.0740801	29.0089	9372.2	0.508423	79.3191
25	HDAC5	Histone deacetylase 5	0.0737037	27.8224	9051.69	0.521965	67.2402
26	CUL5	Cullin-5	0.0706824	32.4916	7209.84	0.504176	62.9558
27	EEF1A1	Elongation factor 1-alpha 1	0.0703873	37.1221	6295.69	0.508938	62.8748
28	HSPA8	Heat shock cognate 71 kDa protein	0.0702408	35.6649	9809.06	0.524687	70.8947
29	APP	Amyloid-beta A4 protein	0.070189	20.1608	64937.8	0.549327	105.708
30	FUS	RNA-binding protein FUS	0.0696282	33.64	6315.63	0.518557	60.2336
31	HSPA5	Endoplasmic reticulum chaperone BiP	0.0691422	34.5532	8232.49	0.51625	70.9282
32	U2AF2	Splicing factor U2AF 65 kDa subunit	0.0670027	33.8811	5725.09	0.516781	72.4281
33	FBXO6	F-box only protein 6	0.0665654	20.9763	13596.9	0.507227	55.0787
34	RPS3	40S ribosomal protein S3	0.0661924	52.8015	1356.82	0.505867	69.0447
35	EGFR	Epidermal growth factor receptor	0.066094	26.0204	46976.5	0.548727	123.63
36	RPS8	40S ribosomal protein S8	0.0659523	55.0155	1379.61	0.500996	71.8867
37	EP300	Histone acetyltransferase p300	0.0652235	33.3264	17909.4	0.533781	106.785
38	YWHAQ	14-3-3 protein theta	0.0642373	28.1158	9306.9	0.523776	61.713
39	STAU1	Double-stranded RNA-binding protein Staufen homolog 1	0.0638121	30.0614	3635	0.511179	53.103
40	PARK2	E3 ubiquitin-protein ligase parkin	0.0637401	24.5099	10263.7	0.51414	61.1628
41	SNW1	SNW domain-containing protein 1	0.0636932	26.9721	12576.7	0.521064	75.6776
42	GRB2	Growth factor receptor-bound protein 2	0.0632866	26.6085	28318.7	0.532087	92.0061
43	VHL	von Hippel-Lindau disease tumor suppressor	0.0629645	23.5737	9239.57	0.510142	51.2777
44	RPLP0	60S acidic ribosomal protein P0	0.0628312	52.875	900.692	0.497527	64.912
45	BRCA1	Breast cancer type 1 susceptibility protein	0.0628025	26.8899	20091.1	0.528176	79.2742
46	MYC	Myc proto-oncogene protein	0.0627048	23.4145	21146.3	0.532275	73.8319
47	NCL	Nucleolin	0.0623696	33.1929	3767.74	0.509453	46.0221
48	RPS2	40S ribosomal protein S2	0.0622759	49.7863	3421.93	0.502498	66.4046
49	RPL6	60S ribosomal protein L6	0.0620191	53.6613	1362.23	0.496872	69.6618
50	RPS4X	40S ribosomal protein S4	0.06171	55.958	1259.12	0.498843	68.9991
51	RPS3A	40S ribosomal protein S3a	0.0617089	56.1579	753.225	0.498843	65.5428
52	ILF3	Interleukin enhancer-binding factor 3	0.0612548	40.6212	3974.52	0.5	54.9326
53	MDM2	E3 ubiquitin-protein ligase Mdm2	0.0612404	26.0718	11531.7	0.525418	61.2197
54	RPS6	40S ribosomal protein S6	0.0608038	55.8833	1076.89	0.496708	69.7814
55	ARRB2	Beta-arrestin-2	0.0606898	25.152	7052.97	0.504682	47.7704
56	RPL5	60S ribosomal protein L5	0.0606174	55.0569	1120.28	0.498349	72.9603
57	EWSR1	RNA-binding protein EWS	0.0605384	23.9021	14334.2	0.525235	61.4744
58	EIF4A3	Eukaryotic initiation factor 4A-III	0.0600349	34.2657	2218.13	0.497855	53.2816
59	RPL7	60S ribosomal protein L7	0.0598451	55.823	688.236	0.496708	65.6112
60	CUL4B	Cullin-4B	0.0596787	31	2853.05	0.508766	46.7398
61	RPL4	60S ribosomal protein L4	0.0591052	52.775	1318.01	0.498349	66.9966
62	ILF2	Interleukin enhancer-binding factor 2	0.0579197	37.6899	2427.01	0.496545	53.3439
63	HNRNPM	Heterogeneous nuclear ribonucleoprotein M	0.0579078	36.1406	1736.48	0.50083	49.6651
64	AR	Androgen receptor	0.0578464	24.6426	37267.8	0.540473	101.927
65	YWHAE	14-3-3 protein epsilon	0.0576276	28.7862	7002.18	0.507227	50.7234
66	DHX9	ATP-dependent RNA helicase A	0.056422	32.5909	3087.76	0.506036	47.7605
67	RPS16	40S ribosomal protein S16	0.0563748	55.6916	673.183	0.495079	63.0823
68	RPSA	40S ribosomal protein SA	0.0562782	47.5405	795.546	0.496218	55.8995
69	RPL18	60S ribosomal protein L18	0.0560629	57.6634	361.501	0.489141	62.7837
70	RPL14	60S ribosomal protein L14	0.0555072	51.9478	1454.06	0.4893	67.2093
71	RPL11	60S ribosomal protein L11	0.054837	53.5755	659	0.491211	61.0981
72	UBE2I	SUMO-conjugating enzyme UBC9	0.054789	24.1106	13911.8	0.521965	64.1112
73	RACK1	Receptor of activated protein C kinase 1	0.0546586	27.8855	5561.35	0.510142	38.2368
74	RPS14	40S ribosomal protein S14	0.054576	51.1321	981.096	0.493944	57.9347
75	HNRNPK	Heterogeneous nuclear ribonucleoprotein K	0.054553	32.448	2679.22	0.508423	44.7633
76	RPL3	60S ribosomal protein L3	0.0543682	52.76	869.387	0.490253	58.1676
77	RPL13	60S ribosomal protein L13	0.0543622	47.5238	1049.76	0.495729	53.3317
78	RPL10	60S ribosomal protein L10	0.0542892	41.0147	2722.33	0.495241	65.9465
79	RPL10A	60S ribosomal protein L10a	0.0542469	55.8571	509.806	0.489141	61.9437
80	CTNNB1	Catenin beta-1	0.0542282	22.4511	15265.2	0.527069	53.3168
81	RPS13	40S ribosomal protein S13	0.0541367	52.9615	712.104	0.490732	59.9472
82	RPL24	60S ribosomal protein L24	0.0540642	49.6442	636.431	0.48443	54.9132
83	DDX5	Probable ATP-dependent RNA helicase DDX5	0.0540568	29.065	2402.34	0.511352	38.7753
84	RPL23A	60S ribosomal protein L23a	0.0539893	53.3774	728.58	0.489141	62.2234
85	RPS27A	Ubiquitin-40S ribosomal protein S27a	0.0539558	29.1216	6882.03	0.512916	48.9892
86	HDAC1	Histone deacetylase 1	0.0538693	30.7122	11994.1	0.523413	88.8247
87	RPL7A	60S ribosomal protein L7a	0.0533966	53.8182	558.501	0.489141	58.7115
88	RPL8	60S ribosomal protein L8	0.053153	51.8431	644.982	0.48835	60.5261
89	RPS9	40S ribosomal protein S9	0.0529354	51.1753	595.336	0.492493	55.1612
90	TUBB	Tubulin beta chain	0.0528409	27.8661	2903.03	0.513615	37.3242
91	TUBG1	Tubulin gamma-1 chain	0.0526879	26.8125	3368.79	0.508766	37.8692
92	PABPC1	Polyadenylate-binding protein 1	0.0526292	33.7699	1569.11	0.498513	42.3742
93	RPS15A	40S ribosomal protein S15a	0.0525339	52.8667	763.207	0.492172	60.5417
94	RPL23	60S ribosomal protein L23	0.0520462	47.8598	1031.96	0.485677	55.8231
95	RPA2	Replication protein A 32 kDa subunit	0.0518289	17.8405	6336.97	0.506036	38.011
96	SMURF1	E3 ubiquitin-protein ligase SMURF1	0.0515558	20.9867	4706.51	0.509281	36.6107
97	RPL12	60S ribosomal protein L12	0.0510042	53.5591	406.948	0.489617	56.8374
98	RPL19	60S ribosomal protein L19	0.0509224	53.6771	382.413	0.484897	59.0097
99	RPL21	60S ribosomal protein L21	0.0506565	53.9479	566.439	0.48599	58.578
100	PARP1	Poly [ADP-ribose] polymerase 1	0.0504501	26.7432	7151.98	0.507227	45.5511
101	RPL22	60S ribosomal protein L22	0.0502925	50.6489	548.861	0.488666	53.2734
102	SUZ12	Polycomb protein SUZ12	0.0497986	20.0457	7500.82	0.508594	46.0578
103	RPL9	60S ribosomal protein L9	0.0497183	55.4945	355.316	0.48042	59.7864
104	MAP3K1	Mitogen-activated protein kinase kinase kinase 1	0.0488861	23.0159	3442.31	0.505867	32.4789
105	YWHAG	14-3-3 protein gamma	0.0488328	25.2069	5563.9	0.51066	45.7847
106	TRAF6	TNF receptor-associated factor 6	0.0486516	20.8128	12826	0.522507	55.5604
107	RPS19	40S ribosomal protein S19	0.0485232	49.4639	1091.92	0.47723	54.1129
108	RPL31	60S ribosomal protein L31	0.0485049	52.828	338.593	0.471857	56.4717
109	PRKDC	DNA-dependent protein kinase catalytic subunit	0.048238	24.4146	4144.51	0.512046	34.1195
110	HSPA1A	Heat shock 70 kDa protein 1A	0.0481094	24.1818	2545.28	0.50233	34.1539
111	HSPA1B	Heat shock 70 kDa protein 1B	0.0481094	24.1818	2545.28	0.50233	34.1539
112	ACTB	Actin, cytoplasmic 1	0.0480479	24	5300.95	0.512742	38.4462
113	RPS20	40S ribosomal protein S20	0.0480103	50.0769	867.834	0.491371	53.2762
114	RPS24	40S ribosomal protein S24	0.0479329	52.4505	382.161	0.480267	56.2247
115	HIST4H4	Histone cluster 4 H4	0.0478112	16.916	2204.98	0.498349	25.5207
116	HIST2H4B	Histone cluster 2 H4 family member B	0.0478112	16.916	2204.98	0.498349	25.5207
117	HIST1H4I	Histone cluster 1 H4 family member I	0.0478112	16.916	2204.98	0.498349	25.5207
118	HIST1H4D	Histone cluster 1 H4 family member D	0.0478112	16.916	2204.98	0.498349	25.5207
119	HIST1H4F	Histone cluster 1 H4 family member F	0.0478112	16.916	2204.98	0.498349	25.5207
120	HIST1H4A	Histone cluster 1 H4 family member A	0.0478112	16.916	2204.98	0.498349	25.5207
121	HIST1H4C	Histone cluster 1 H4 family member C	0.0478112	16.916	2204.98	0.498349	25.5207
122	HIST1H4H	Histone cluster 1 H4 family member H	0.0478112	16.916	2204.98	0.498349	25.5207
123	HIST1H4K	Histone cluster 1 H4 family member K	0.0478112	16.916	2204.98	0.498349	25.5207
124	HIST1H4J	Histone cluster 1 H4 family member J	0.0478112	16.916	2204.98	0.498349	25.5207
125	HIST1H4L	Histone cluster 1 H4 family member L	0.0478112	16.916	2204.98	0.498349	25.5207
126	HIST1H4B	Histone cluster 1 H4 family member B	0.0478112	16.916	2204.98	0.498349	25.5207
127	HIST1H4E	Histone cluster 1 H4 family member E	0.0478112	16.916	2204.98	0.498349	25.5207
128	HIST2H4A	Histone cluster 2 H4 family member A	0.0478112	16.916	2204.98	0.498349	25.5207
129	NOP56	Nucleolar protein 56	0.0474691	37.9558	1266.78	0.480726	52.5136
130	CREBBP	CREB-binding protein	0.0471468	30.3407	8987.16	0.515897	73.2168
131	H2AFX	Histone H2AX	0.0469587	21.875	3068.44	0.50502	31.703
132	YBX1	Nuclease-sensitive element-binding protein 1	0.0469345	26.3056	2236.6	0.505867	34.1228
133	HSPA4	Heat shock 70 kDa protein 4	0.0468519	23.2044	6375.8	0.51625	37.5753
134	ARRB1	Beta-arrestin-1	0.04661	19.1343	5424.67	0.497199	30.1799
135	HNRNPR	Heterogeneous nuclear ribonucleoprotein R	0.0460427	30.303	1038.54	0.496708	36.8247
136	RELA	Transcription factor p65	0.0458133	24.6218	8166.71	0.517845	48.9287
137	IKBKG	NF-kappa-B essential modulator	0.0457788	22.1355	8217.92	0.506716	44.0819
138	CUL4A	Cullin-4A	0.0454326	23.0082	3128.82	0.485209	34.9667
139	TRIM28	Transcription intermediary factor 1-beta	0.0454276	22.1892	2851.25	0.502163	29.5688
140	CLTC	Clathrin heavy chain 1	0.0454251	22.4454	5087.06	0.50997	35.4949
141	RPL18A	60S ribosomal protein L18a	0.04534	50.2697	454.13	0.48134	54.3674
142	GAPDH	Glyceraldehyde-3-phosphate dehydrogenase	0.0453093	25.6176	3153.47	0.508081	32.6649
143	EEF2	Elongation factor 2	0.0452721	32.0115	952.364	0.491691	34.6471
144	HNRNPD	Heterogeneous nuclear ribonucleoprotein D0	0.0451029	26.625	2381.06	0.504176	35.0634
145	RPS23	40S ribosomal protein S23	0.0449131	52.7586	281.177	0.4792	56.0367
146	EZH2	Histone-lysine N-methyltransferase EZH2	0.0448876	22.5	4422.23	0.502498	38.0756
147	HSPA9	Stress-70 protein, mitochondrial	0.0448572	22.25	1647.75	0.498349	27.3869
148	XRCC6	X-ray repair cross-complementing protein 6	0.0445775	21.2419	5614.77	0.50997	32.7512
149	RPL27A	60S ribosomal protein L27a	0.0444869	49.7262	492.797	0.47423	52.2462
150	RPS18	40S ribosomal protein S18	0.0443986	50.2561	439.797	0.485365	51.9738
151	SRRM2	Serine/arginine repetitive matrix protein 2	0.044231	25.9909	1754.57	0.497527	35.0391
152	HDAC2	Histone deacetylase 2	0.0442215	26.1958	5190.67	0.503	50.1855
153	SYNCRIP	Heterogeneous nuclear ribonucleoprotein Q	0.0441721	24.2308	3860.07	0.499338	31.5292
154	AKT1	RAC-alpha serine/threonine-protein kinase	0.044144	23.1049	11586.2	0.520524	49.7034
155	CDK1	Cyclin-dependent kinase 1	0.0438578	21.1729	5152.45	0.500166	36.1188
156	SLC25A5	ADP/ATP translocase 2	0.0437624	29.6627	931.859	0.493298	31.0886
157	RPL17	60S ribosomal protein L17	0.043658	53.4177	233.332	0.478592	55.0192
158	HNRNPA2B1	Heterogeneous nuclear ribonucleoproteins A2/B1	0.0436269	26.9239	1046.42	0.496708	31.1669
159	HSPB1	Heat shock protein beta-1	0.0434439	21.9106	5448.72	0.506206	35.6165
160	IKBKE	Inhibitor of nuclear factor kappa-B kinase subunit epsilon	0.0434028	16.6575	4989.08	0.502498	32.4427
161	HSPD1	60 kDa heat shock protein	0.043201	23.8557	3633.75	0.505358	30.0901
162	MAPK1	Mitogen-activated protein kinase 1	0.0430413	23.4759	7211.67	0.518557	42.1918
163	RPL37A	60S ribosomal protein L37a	0.0430132	47.8736	577.083	0.479657	50.7942
164	CALM2	Calmodulin-2	0.0428313	19.9304	12437.1	0.518913	49.7798
165	CALM1	Calmodulin-1	0.0428313	19.9304	12437.1	0.518913	49.7798
166	CALM3	Calmodulin-3	0.0428313	19.9304	12437.1	0.518913	49.7798
167	SMAD3	Mothers against decapentaplegic homolog 3	0.0423942	23.2956	10260.4	0.518913	51.8705
168	MAP3K3	Mitogen-activated protein kinase kinase kinase 3	0.042334	19.2424	4353.41	0.490572	33.8912
169	RUVBL2	RuvB-like 2	0.0420965	22	2069.7	0.504514	28.268
170	BMI1	Polycomb complex protein BMI-1	0.0420529	19.4222	3773.91	0.489617	33.4683
171	COMMD3-BMI1	COMMD3-BMI1 readthrough	0.0420529	19.4222	3773.91	0.489617	33.4683
172	SMARCA4	Transcription activator BRG1	0.0417739	25.4769	4029.49	0.503336	43.3155
173	DDX3X	ATP-dependent RNA helicase DDX3X	0.0415742	21.0353	1227.07	0.496545	23.9185
174	FLNA	Filamin-A	0.0414444	23.1441	5575.76	0.507057	39.608
175	RPL13A	60S ribosomal protein L13a	0.041376	48.0649	440.033	0.475875	49.5256
176	AURKA	Aurora kinase A	0.041163	18.2	6290.72	0.501996	28.3046
177	NFKB1	Nuclear factor NF-kappa-B p105 subunit	0.04075	22.8095	5051.82	0.509281	35.9849
178	NOS2	Nitric oxide synthase	0.040688	18.0513	17991.2	0.48443	47.5133
179	RPL36	60S ribosomal protein L36	0.0404622	48.1923	279.66	0.473783	49.9743
180	CCT2	T-complex protein 1 subunit beta	0.0402896	27.8659	794.864	0.496545	31.0409
181	PPP1CA	Serine/threonine-protein phosphatase PP1-alpha catalytic subunit	0.0401585	20.0172	7518.85	0.509797	31.8713
182	DDX17	Probable ATP-dependent RNA helicase DDX17	0.0400442	26.026	751.535	0.497036	28.0185
183	XRCC5	X-ray repair cross-complementing protein 5	0.0398125	20.4762	3538.64	0.502665	28.9014
184	SRSF1	Serine/arginine-rich splicing factor 1	0.0396881	28.9888	1211.74	0.495079	36.4223
185	HDAC3	Histone deacetylase 3	0.0392839	24.9154	4388.75	0.50502	42.3757
186	HNRNPC	Heterogeneous nuclear ribonucleoproteins C1/C2	0.0392113	22.75	1127.27	0.494916	24.9887
187	MYH9	Myosin-9	0.0390457	22.2301	3667.37	0.504176	37.2102
188	GSK3B	Glycogen synthase kinase-3 beta	0.0389722	15.016	37744.2	0.51625	55.9768
189	SRC	Proto-oncogene tyrosine-protein kinase Src	0.03895	23.1557	16869.5	0.522869	64.6507
190	ABL1	Tyrosine-protein kinase ABL1	0.0388933	22.3065	4339.22	0.50384	37.9088
191	RB1	Retinoblastoma-associated protein	0.0388534	23.4173	5416.23	0.498349	42.3394
192	CDKN1A	Cyclin-dependent kinase inhibitor 1	0.0387782	18.9573	4726.35	0.504176	29.1822
193	LOC101929876	40S ribosomal protein S26	0.0387423	47.44	255.179	0.476175	49.0683
194	RPS26	ribosomal protein S26	0.0387423	47.44	255.179	0.476175	49.0683
195	SIRT1	NAD-dependent protein deacetylase sirtuin-1	0.0384758	20.1429	5048.91	0.502665	32.4587
196	HDAC6	Histone deacetylase 6	0.0384701	17.2797	3863.95	0.497855	25.1893
197	PSMA3	Proteasome subunit alpha type-3	0.0384557	25.9593	5005.27	0.493137	43.8825
198	RPS12	40S ribosomal protein S12	0.0380427	46.6111	998.878	0.475425	47.665
199	HNRNPF	Heterogeneous nuclear ribonucleoprotein F	0.0380345	24.3867	930.073	0.490732	27.3221
200	SP1	Transcription factor Sp1	0.0380127	23.6739	6256.83	0.512394	43.8142
201	SFPQ	Splicing factor, proline- and glutamine-rich	0.037947	22.4688	2011.4	0.501162	29.0722
202	DHX15	Pre-mRNA-splicing factor ATP-dependent RNA helicase DHX15	0.0377259	23.8272	1224.56	0.48443	27.5354
203	TOP1	DNA topoisomerase 1	0.0376728	25.4235	1123.54	0.491691	30.0482
204	SFN	14-3-3 protein sigma	0.037481	19.5096	3026.24	0.493621	26.4591
205	IQGAP1	Ras GTPase-activating-like protein IQGAP1	0.0374724	20.6579	4115.48	0.492654	34.7155
206	VIM	Vimentin	0.0374019	16.7321	5435.7	0.50083	26.7307
207	PCNA	Proliferating cell nuclear antigen	0.0373839	19.4554	2673.95	0.488508	27.0958
208	SMAD2	Mothers against decapentaplegic homolog 2	0.0373742	19.3106	5562.39	0.509625	35.0405
209	RPLP1	60S acidic ribosomal protein P1	0.0370306	41.7467	595.061	0.448573	43.4241
210	JUN	Transcription factor AP-1	0.0370287	23.705	6953.74	0.511699	47.7137
211	HIST3H3	Histone H3.1t	0.0368151	27.6667	3148.75	0.481647	44.646
212	RUVBL1	RuvB-like 1	0.0366245	20.236	1590	0.500664	24.6626
213	CCT3	T-complex protein 1 subunit gamma	0.036521	23.8372	893.268	0.484897	28.4805
214	KAT5	Histone acetyltransferase KAT5	0.0358013	22.8692	3278.18	0.498843	31.9547
215	PPP2R1A	Serine/threonine-protein phosphatase 2A 65 kDa regulatory subunit A alpha isoform	0.0357783	17.8889	3445.28	0.499173	23.9606
216	ICAM1	Intercellular adhesion molecule 1	0.035764	21.5111	955.461	0.451526	23.3129
217	SF3B1	Splicing factor 3B subunit 1	0.0357336	22.557	930.41	0.492654	25.7527
218	TCP1	T-complex protein 1 subunit alpha	0.035715	24.2877	497.579	0.478288	26.54
219	PTEN	Phosphatidylinositol 3,4,5-trisphosphate 3-phosphatase and dual-specificity protein phosphatase PTEN	0.0355354	16.4273	3844.36	0.497691	24.887
220	PTBP1	Polypyrimidine tract-binding protein 1	0.0354152	25.0556	525.208	0.479809	27.4158
221	RBBP4	Histone-binding protein RBBP4	0.0353292	24.8602	1427.25	0.488508	32.1865
222	PML	Protein PML	0.0351445	21.124	3829.53	0.499338	33.2022
223	TUBA1C	Tubulin alpha-1C chain	0.0350806	19.9884	1923.19	0.491851	24.6765
224	DDX1	ATP-dependent RNA helicase DDX1	0.0350317	20.9242	564.377	0.491211	23.4162
225	YWHAB	14-3-3 protein beta/alpha	0.0347869	20.5913	3790.33	0.497527	34.1758
226	CDC37	Hsp90 co-chaperone Cdc37	0.0347817	18.8319	5217.92	0.495404	32.9538
227	POLR2A	DNA-directed RNA polymerase II subunit RPB1	0.0346743	18.5391	4733.91	0.500332	35.6192
228	PRMT1	Protein arginine N-methyltransferase 1	0.0346703	18.8588	2446.5	0.491691	23.4489
229	DNAJA1	DnaJ homolog subfamily A member 1	0.0344952	20.1948	896.639	0.484586	21.6651
230	NAP1L1	Nucleosome assembly protein 1-like 1	0.0344137	21.0822	1538.08	0.477834	23.7672
231	SMN1	Survival motor neuron protein	0.0343952	18.8247	2011.13	0.479962	25.0377
232	SMN2	Survival motor neuron protein	0.0343951	18.8247	2011.13	0.479962	25.0377
233	KPNB1	Importin subunit beta-1	0.0342485	15.878	1834.88	0.48646	19.3103
234	MYBBP1A	Myb-binding protein 1A	0.0341364	23.7121	691.044	0.48599	25.2401
235	RPS17	40S ribosomal protein S17	0.0340185	39.4068	131.478	0.454381	40.2816
236	NR3C1	Glucocorticoid receptor	0.0339828	17.8503	10595.1	0.499834	41.3877
237	SHC1	SHC-transforming protein 1	0.0339494	21.8065	5399.96	0.505189	43.3003
238	TUBA1A	Tubulin alpha-1A chain	0.0339141	18.2414	1996.4	0.499503	21.573
239	PXN	Paxillin	0.033635	18.2347	1905.41	0.477985	23.4612
240	CCT4	T-complex protein 1 subunit delta	0.0336096	23.338	461.766	0.479352	25.229
241	STUB1	E3 ubiquitin-protein ligase CHIP	0.0332945	21.566	4840.15	0.504345	31.5376
242	NONO	Non-POU domain-containing octamer-binding protein	0.0332541	18.6582	1800.92	0.490413	22.9299
243	LMNA	Prelamin-A/C	0.0331747	18.8795	1387.33	0.480726	22.186
244	HNRNPA3	Heterogeneous nuclear ribonucleoprotein A3	0.0331746	24.5424	236.608	0.480267	25.9561
245	PPP2CA	Serine/threonine-protein phosphatase 2A catalytic subunit alpha isoform	0.0331326	17.4	3330.49	0.500664	24.1405
246	CCT8	T-complex protein 1 subunit theta	0.0330861	24.1618	411.311	0.482109	25.7854
247	CAD	carbamoyl-phosphate synthetase 2, aspartate transcarbamylase, and dihydroorotase	0.0330204	22.275	718.93	0.483035	24.7231
248	PHB	Prohibitin	0.0329973	16.7945	1860.35	0.493944	19.1205
249	LRRK2	Leucine-rich repeat serine/threonine-protein kinase 2	0.0328582	15.5714	4581.64	0.477683	25.5056
250	DDX21	Nucleolar RNA helicase 2	0.0327503	18.0704	887.004	0.484897	20.4811
251	PRPF8	Pre-mRNA-processing-splicing factor 8	0.0327306	23.0135	1014.53	0.486774	26.304
252	TNFRSF1A	Tumor necrosis factor receptor superfamily member 1A	0.0326487	16.0088	5063.24	0.481955	26.6225
253	ATP5B	ATP synthase subunit beta	0.0324655	16.4789	1460.9	0.486931	18.3317
254	NOP2	Probable 28S rRNA (cytosine(4447)-C(5))-methyltransferase	0.0321007	27.6406	296.977	0.475126	30.675
255	PPP1CC	Serine/threonine-protein phosphatase PP1-gamma catalytic subunit	0.0320584	15.2917	5597.16	0.50083	22.8832
256	CCT6A	T-complex protein 1 subunit zeta	0.0320433	22.8356	1024.05	0.475276	26.0152
257	PSMC5	26S proteasome regulatory subunit 8	0.0318738	25.0319	3282.88	0.496218	35.3431
258	CBL	E3 ubiquitin-protein ligase CBL	0.0317008	23.0776	4401.56	0.488824	40.54
259	FBXW11	F-box/WD repeat-containing protein 11	0.0316829	15.2642	4046.9	0.486774	25.1529
260	EIF6	Eukaryotic translation initiation factor 6	0.0316228	18.7654	1533.27	0.483964	23.3988
261	PSMD2	26S proteasome non-ATPase regulatory subunit 2	0.0315594	23.8866	2630.75	0.484275	35.5393
262	PCBP1	Poly(rC)-binding protein 1	0.0315446	17.4412	762.012	0.481186	19.0797
263	SNRPD1	Small nuclear ribonucleoprotein Sm D1	0.0314154	22.4394	532.51	0.480573	25.0402
264	HNRNPA0	Heterogeneous nuclear ribonucleoprotein A0	0.0313492	24.0508	280.518	0.476025	25.3858
265	USP7	Ubiquitin carboxyl-terminal hydrolase 7	0.0312511	15.4286	4043.52	0.488508	22.9365
266	BTRC	F-box/WD repeat-containing protein 1A	0.0311765	16.1217	6017.18	0.490413	28.096
267	EFTUD2	116 kDa U5 small nuclear ribonucleoprotein component	0.0311647	23.3182	625.426	0.485053	25.3226
268	KAT2B	Histone acetyltransferase KAT2B	0.0310517	19.0885	2755.58	0.479048	29.1145
269	SRPK2	SRSF protein kinase 2	0.0310499	17.0476	3503.59	0.489776	28.5066
270	ANXA2	Annexin A2	0.0310074	16.0462	1007.22	0.492976	17.3752
271	ILK	Integrin-linked protein kinase	0.0308793	14.2376	2458.86	0.478288	21.4025
272	ALYREF	THO complex subunit 4	0.0307294	22.1273	253.927	0.481801	23.4032
273	CCT5	T-complex protein 1 subunit epsilon	0.0306828	21.4308	385.914	0.476777	22.9315
274	STAT3	Signal transducer and activator of transcription 3	0.0305758	19.5929	6330.68	0.503168	32.4793
275	WDR5	WD repeat-containing protein 5	0.0305199	17.439	2230.39	0.494916	23.7618
276	SRSF3	Serine/arginine-rich splicing factor 3	0.0305078	22.7143	446.834	0.4792	24.4315
277	CHUK	Inhibitor of nuclear factor kappa-B kinase subunit alpha	0.0304656	20.631	1641.47	0.499669	25.104
278	NCOR1	Nuclear receptor corepressor 1	0.0304183	22.1682	2962.12	0.492012	33.5348
279	NCOA3	Nuclear receptor coactivator 3	0.0304058	20.596	2923.06	0.498678	28.8465
280	CSNK2B	Casein kinase II subunit beta	0.0303913	13.99	6538.11	0.500664	23.4157
281	SNRNP70	U1 small nuclear ribonucleoprotein 70 kDa	0.0303749	20.5758	538.595	0.478288	21.7354
282	HSP90B1	Endoplasmin	0.0301671	18.4783	1964.18	0.490094	22.1966
283	SET	Protein SET	0.0301379	17.4557	2813.31	0.494592	21.7984
284	RBM39	RNA-binding protein 39	0.0300447	19.5846	623.536	0.488192	21.3003
285	MAPK3	Mitogen-activated protein kinase 3	0.0298524	16.28	3148.27	0.498513	22.5461
286	PRMT5	Protein arginine N-methyltransferase 5	0.0297374	16.8415	1756.64	0.473783	20.8736
287	SQSTM1	Sequestosome-1	0.0296179	17	3172.65	0.490413	23.2754
288	CRK	Adapter molecule crk	0.0295722	17.5143	3830.03	0.492654	29.6725
289	C1QBP	Complement component 1 Q subcomponent-binding protein	0.0294655	16.2174	1547.09	0.476928	18.0816
290	ENO1	Alpha-enolase	0.0293537	14.8906	2080.33	0.479048	16.9245
291	ELAVL1	ELAV-like protein 1	0.0293485	17.5303	972.244	0.472893	19.1265
292	PA2G4	Proliferation-associated protein 2G4	0.0292629	15.1692	804.764	0.48288	16.3664
293	HIF1A	Hypoxia-inducible factor 1-alpha	0.0290815	18.8523	2427.23	0.493944	23.9013
294	CDK9	Cyclin-dependent kinase 9	0.0288179	13.8958	2910.28	0.476627	21.6795
295	HSPA1L	Heat shock 70 kDa protein 1-like	0.0287725	16.2206	1573.26	0.491691	18.0663
296	EEF1G	Elongation factor 1-gamma	0.0286876	15.7167	879.965	0.473783	17.446
297	PRPF19	Pre-mRNA-processing factor 19	0.0286298	23.931	321.751	0.477985	25.3057
298	TBK1	Serine/threonine-protein kinase TBK1	0.0285896	18.5556	1239.43	0.495079	21.0889
299	PPARG	Peroxisome proliferator-activated receptor gamma	0.0285238	14.6364	25805.4	0.503	46.082
300	SPTAN1	Spectrin alpha chain	0.0285073	16.7429	1209.91	0.489141	19.4252
301	GAN	Gigaxonin	0.0283142	14.0274	669.893	0.44884	15.742
302	P4HB	Protein disulfide-isomerase	0.0281283	18.8413	1106.66	0.486304	22.1316
303	IKBKB	Inhibitor of nuclear factor kappa-B kinase subunit beta	0.0280006	19.8235	1695.41	0.485209	24.7826
304	RAF1	RAF proto-oncogene serine/threonine-protein kinase	0.0279752	17.8632	3612.24	0.4893	25.7997
305	SRPK1	SRSF protein kinase 1	0.0278688	17.6914	2415.29	0.489617	24.8209
306	UCHL5	Ubiquitin carboxyl-terminal hydrolase isozyme L5	0.0276824	18.7879	3382.13	0.477834	30.3019
307	PRDX1	Peroxiredoxin-1	0.0275682	14.6071	789.98	0.472893	15.7471
308	SF1	Splicing factor 1	0.0275588	16.8873	815.141	0.46175	19.2982
309	CCT7	T-complex protein 1 subunit eta	0.0275096	20.7	431.106	0.479809	21.7782
310	EMD	Emerin	0.0274784	16.2698	1349.32	0.489458	17.6553
311	TRAF2	TNF receptor-associated factor 2	0.0274131	16.7812	4591.17	0.48835	26.4084
312	UPF1	Regulator of nonsense transcripts 1	0.0273435	15.7667	1403.73	0.478137	18.0137
313	SKP1	S-phase kinase-associated protein 1	0.0272355	16.3284	1374.55	0.491211	20.1403
314	RBM14	RNA-binding protein 14	0.0271921	16.7759	462.023	0.476476	17.8309
315	RBM14-RBM4	Protein RBM14-RBM4	0.0271921	16.7759	462.023	0.476476	17.8309
316	PIN1	Peptidyl-prolyl cis-trans isomerase NIMA-interacting 1	0.0271692	12.1196	3586.78	0.48835	16.193
317	PRKACA	cAMP-dependent protein kinase catalytic subunit alpha	0.0271585	8.73793	22210.4	0.514315	27.8737
318	DAXX	Death domain-associated protein 6	0.0270854	15.6705	2193.98	0.475126	20.662
319	NCOR2	Nuclear receptor corepressor 2	0.0270826	19.1789	2210.11	0.48646	27.6308
320	LGALS3BP	Galectin-3-binding protein	0.0269866	21.0678	548.862	0.460201	22.2459
321	RPL28	60S ribosomal protein L28	0.0268048	24.7872	284.162	0.472893	25.4755
322	BARD1	BRCA1-associated RING domain protein 1	0.0267616	13	3816.87	0.488824	22.18
323	SF3A1	Splicing factor 3A subunit 1	0.0265815	18.0435	804.625	0.465166	20.1906
324	RBMX	RNA-binding motif protein	0.0265733	21.5789	564.126	0.474976	23.9812
325	EIF4A1	Eukaryotic initiation factor 4A-I	0.0265591	17.2927	173.994	0.474081	18.2452
326	KHDRBS1	KH domain-containing	0.0265558	16.4286	4098	0.492172	22.6867
327	HDAC4	Histone deacetylase 4	0.0265464	18.2558	3144.42	0.496382	25.2795
328	SND1	Staphylococcal nuclease domain-containing protein 1	0.0265185	17.549	599.767	0.477381	18.6285
329	EPRS	Bifunctional glutamate/proline--tRNA ligase	0.0264512	15.6792	494.306	0.483035	17.3804
330	RPN1	26S proteasome regulatory subunit RPN1	0.0263965	16.7213	649.836	0.482571	19.2221
331	RBX1	E3 ubiquitin-protein ligase RBX1	0.026375	15.5938	1039.57	0.483189	18.981
332	ABCE1	ATP-binding cassette sub-family E member 1	0.026307	12.625	2865.08	0.48088	18.9438
333	HNRNPH2	Heterogeneous nuclear ribonucleoprotein H2	0.0262696	21.9412	264.689	0.472596	23.9318
334	SKI	Ski oncogene	0.0262609	13.6197	1389.15	0.479962	15.7551
335	TOP2A	DNA topoisomerase 2-alpha	0.0262408	15.3934	732.051	0.488508	16.4722
336	ATF2	Cyclic AMP-dependent transcription factor ATF-2	0.0261522	13.21	3273.14	0.483189	22.5647
337	GNL3	Guanine nucleotide-binding protein-like 3	0.0261075	23.2553	377.906	0.469801	24.0983
338	HNRNPAB	Heterogeneous nuclear ribonucleoprotein A/B	0.0260882	17.8936	208.763	0.47423	18.4826
339	SERBP1	Plasminogen activator inhibitor 1 RNA-binding protein	0.0260437	16.6792	452.759	0.484275	17.2842
340	OTUB1	Ubiquitin thioesterase OTUB1	0.0258693	12.0658	1932.37	0.487088	15.5065
341	PCBP2	Poly(rC)-binding protein 2	0.0258177	18.5098	307.461	0.459921	19.6053
342	YWHAH	14-3-3 protein eta	0.0257418	16.2692	2230.04	0.497363	22.3295
343	SRSF7	Serine/arginine-rich splicing factor 7	0.0256422	18.7931	500.836	0.482571	20.6173
344	CFL1	Cofilin-1	0.0253111	14.7742	1101.28	0.490253	17.0793
345	SRSF5	Serine/arginine-rich splicing factor 5	0.0252515	17.4237	642.385	0.481493	18.2326
346	FASN	Fatty acid synthase	0.0252255	15.7872	339.677	0.464594	16.7805
347	PSMD1	26S proteasome non-ATPase regulatory subunit 1	0.025205	25.9853	1026.26	0.489458	29.9234
348	PIK3R1	Phosphatidylinositol 3-kinase regulatory subunit alpha	0.0251724	20.4444	4323.99	0.5	36.9143
349	CCND1	G1/S-specific cyclin-D1	0.0251604	16.4697	1356.09	0.495892	18.7607
350	PSMA6	Proteasome subunit alpha type-6	0.025135	25.2778	809.456	0.471415	30.1073
351	MAPK8	Mitogen-activated protein kinase 8	0.0249634	16.7717	2690.73	0.487876	23.0029
352	H3F3B	Histone H3.3	0.0249178	18.6462	684.808	0.4723	20.9363
353	H3F3A	Histone H3.3	0.0249178	18.6462	684.808	0.4723	20.9363
354	H3F3AP4	H3 histone, family 3A, pseudogene 4	0.0249178	18.6462	684.808	0.4723	20.9363
355	MAPK14	Mitogen-activated protein kinase 14	0.0249018	13.8571	2640.08	0.496545	19.8973
356	SIN3A	Paired amphipathic helix protein Sin3a	0.0248596	16.9348	2387.58	0.489935	25.8286
357	SRRM1	Serine/arginine repetitive matrix protein 1	0.0248207	16.7297	963.219	0.478896	20.6142
358	SNCA	Alpha-synuclein	0.0248063	15	3608.46	0.484586	19.6923
359	SRSF2	Serine/arginine-rich splicing factor 2	0.0246836	15.9107	537.855	0.479657	16.5314
360	RPL29	60S ribosomal protein L29	0.0245869	27.9773	94.6437	0.465597	28.716
361	STIP1	Stress-induced-phosphoprotein 1	0.0245803	16.3521	1015.59	0.475126	20.1756
362	PPIA	Peptidyl-prolyl cis-trans isomerase A	0.0244862	13.7234	472.898	0.481647	14.9031
363	G3BP1	Ras GTPase-activating protein-binding protein 1	0.0244667	14.2931	1031.8	0.484275	17.3189
364	SS18	Protein SSXT	0.0244381	17.4615	343.971	0.47423	18.4885
365	TAB2	TGF-beta-activated kinase 1 and MAP3K7-binding protein 2	0.0243497	17.6	631.08	0.489935	19.6778
366	THRAP3	Thyroid hormone receptor-associated protein 3	0.0242649	14.1695	570.379	0.482417	15.1124
367	PSMD4	26S proteasome non-ATPase regulatory subunit 4	0.0242288	26.3649	1186.95	0.48042	32.01
368	DDX18	ATP-dependent RNA helicase DDX18	0.0241509	19.7959	1118.79	0.471562	22.03
369	PHB2	Prohibitin-2	0.0240565	11.4603	1535.16	0.485209	13.6793
370	NUDT21	Cleavage and polyadenylation specificity factor subunit 5	0.0240282	11.0702	1593.39	0.480726	12.5886
371	SUPT16H	FACT complex subunit SPT16	0.0239515	15	637.569	0.476627	16.1641
372	GRK5	G protein-coupled receptor kinase 5	0.0238354	10.5802	3048.62	0.459081	13.7671
373	SNRPD3	Small nuclear ribonucleoprotein Sm D3	0.0238326	15.1373	418.286	0.453971	16.2623
374	SMAD4	Mothers against decapentaplegic homolog 4	0.0238299	17.3516	3767.13	0.496545	27.7492
375	NFATC2	Nuclear factor of activated T-cells	0.0237479	12.3375	1971.78	0.471268	16.0991
376	NOP58	Nucleolar protein 58	0.0237465	21.5926	240.387	0.463025	24.0504
377	DBN1	Drebrin	0.0237217	16.9875	1949.24	0.491851	25.8781
378	SUMO1	Small ubiquitin-related modifier 1	0.0236359	15.6867	1846.98	0.476928	21.2999
379	RBBP7	Histone-binding protein RBBP7	0.0235571	17.9714	1004.9	0.472153	22.7766
380	PSMC2	26S proteasome regulatory subunit 7	0.0235324	26.8667	1027.9	0.472744	32.8989
381	SMARCC1	SWI/SNF complex subunit SMARCC1	0.0234481	16.4931	1061.92	0.479657	20.1319
382	KDM1A	Lysine-specific histone demethylase 1A	0.023444	15.1236	4392.11	0.488192	27.4562
383	AP2M1	AP-2 complex subunit mu	0.0233246	14.4848	2209.79	0.485521	17.4802
384	LUC7L2	Putative RNA-binding protein Luc7-like 2	0.0232886	15.0303	1250.16	0.470093	17.9073
385	PELP1	Proline-, glutamic acid- and leucine-rich protein 1	0.023123	13.9245	498.092	0.477532	14.7928
386	MGMT	Methylated-DNA--protein-cysteine methyltransferase	0.0230869	13.8367	177.059	0.473041	14.1323
387	DARS	Aspartate--tRNA ligase	0.0230308	15.3721	322.373	0.4792	16.334
388	NEDD4	E3 ubiquitin-protein ligase NEDD4	0.0230304	11.1798	3227.65	0.481186	16.1528
389	DNAJA2	DnaJ homolog subfamily A member 2	0.0230183	16.6739	209.33	0.469508	17.1021
390	SPTBN1	Spectrin beta chain, non-erythrocytic 1	0.0229747	13.9815	553.551	0.488666	14.8487
391	PAK1	Serine/threonine-protein kinase PAK 1	0.0229359	11.3478	1425.46	0.486931	13.8276
392	CANX	Calnexin	0.0228857	13.5645	3151.15	0.467617	16.3711
393	HNRNPUL1	Heterogeneous nuclear ribonucleoprotein U-like protein 1	0.0228747	15.4583	376.636	0.465453	16.4966
394	HSPH1	Heat shock protein 105 kDa	0.0228051	12.8364	578.048	0.459501	13.7917
395	PRKCA	Protein kinase C alpha type	0.0227898	11.5	7925.6	0.4893	20.2231
396	MAPT	Microtubule-associated protein tau	0.0226628	15.9028	2026.09	0.482417	19.1712
397	SMC3	Structural maintenance of chromosomes protein 3	0.0225993	12	608.949	0.478288	13.1283
398	PSMA7	Proteasome subunit alpha type-7	0.0225912	26.7258	598.415	0.475126	29.711
399	BAG2	BAG family molecular chaperone regulator 2	0.0225246	15.6604	368.435	0.466749	16.4661
400	PLEC	Plectin	0.0224617	11	1537.56	0.484741	12.8749
401	PSMD11	26S proteasome non-ATPase regulatory subunit 11	0.0224131	22.8824	1347.91	0.480115	26.9537
402	NAT10	RNA cytidine acetyltransferase	0.0223811	14.2	163.183	0.476175	14.6153
403	PRKCD	Protein kinase C delta type	0.0223373	14.7215	4285.29	0.47844	20.7033
404	IARS	Isoleucine--tRNA ligase	0.0223016	12.7727	234.768	0.4723	13.5171
405	LYAR	Cell growth-regulating nucleolar protein	0.0222983	14.3667	638.488	0.460061	17.0599
406	NOLC1	Nucleolar and coiled-body phosphoprotein 1	0.0222202	13.5741	546.004	0.462741	14.8734
407	HTT	Huntingtin	0.0221829	12.2857	3369.06	0.481801	17.3248
408	KMT2A	Histone-lysine N-methyltransferase 2A	0.0221362	17.2297	1077.17	0.457273	20.3965
409	UBE3A	Ubiquitin-protein ligase E3A	0.0220774	13.2923	2088.19	0.492976	16.1635
410	ERG	Transcriptional regulator ERG	0.022005	11.6182	351.84	0.458802	12.242
411	PAXIP1	PAX-interacting protein 1	0.0219794	8.12088	3255.99	0.478288	14.0211
412	CHD4	Chromodomain-helicase-DNA-binding protein 4	0.0219216	16.5833	682.716	0.474976	18.9387
413	COPS2	COP9 signalosome complex subunit 2	0.0219006	13.1552	844.307	0.458942	14.867
414	GCN1	eIF-2-alpha kinase activator GCN1	0.0218331	10.2889	569.41	0.477532	10.9395
415	KAT2A	Histone acetyltransferase KAT2A	0.0217969	14.7761	888.97	0.455341	17.6276
416	PIK3R2	Phosphatidylinositol 3-kinase regulatory subunit beta	0.0217895	17.623	1290.87	0.488982	20.5727
417	TUBA1B	Tubulin alpha-1B chain	0.0217735	10.5439	727.842	0.481186	11.6405
418	NDRG1	Protein NDRG1	0.0216722	10.1964	819.009	0.456443	10.6918
419	NOTCH1	Neurogenic locus notch homolog protein 1	0.021623	12.6154	1696.84	0.479352	15.5816
420	STAT1	Signal transducer and activator of transcription 1-alpha/beta	0.0216017	13.7531	3543.99	0.484897	19.3329
421	CAV1	Caveolin-1	0.0215864	14.2706	6784.32	0.506376	22.8051
422	PSMA5	Proteasome subunit alpha type-5	0.0215772	24.7619	705.642	0.470093	28.1308
423	HIST2H2AC	Histone H2A type 2-C	0.0215266	20.6786	566.557	0.472153	23.2774
424	NCOA1	Nuclear receptor coactivator 1	0.0215107	17.9891	3559.74	0.48835	30.9355
425	RTCB	tRNA-splicing ligase RtcB homolog	0.0213025	13.5789	191.774	0.472005	14.1084
426	EEF1A2	Elongation factor 1-alpha 2	0.0212898	11.4348	205.163	0.454929	11.7401
427	E2F1	Transcription factor E2F1	0.0212516	14.1304	1513.16	0.488666	17.7949
428	KRT18	Keratin, type I cytoskeletal 18	0.021212	12.1333	1951.76	0.488034	14.1214
429	NCOA2	Nuclear receptor coactivator 2	0.0211848	14.1154	2416	0.479809	19.5228
430	ZBTB1	Zinc finger and BTB domain-containing protein 1	0.0210888	10.78	295.196	0.44884	11.1588
431	RARA	Retinoic acid receptor alpha	0.0210291	16.4222	2552.45	0.490253	24.9244
432	JUP	Junction plakoglobin	0.0210049	11.4727	1329.64	0.484741	13.6028
433	TBP	TATA-box-binding protein	0.020993	16.5063	2799.22	0.481955	24.9537
434	IGF2BP1	Insulin-like growth factor 2 mRNA-binding protein 1	0.0209852	9.35135	171.835	0.462033	9.6732
435	NUMA1	Nuclear mitotic apparatus protein 1	0.0209039	10.5111	556.194	0.475126	11.1431
436	PSMC3	26S proteasome regulatory subunit 6A	0.0208636	23.0556	1582.08	0.473932	28.5931
437	CDK4	Cyclin-dependent kinase 4	0.0207997	11.4545	1086.66	0.474976	12.6593
438	FOS	Proto-oncogene c-Fos	0.0207696	13	3121.55	0.493298	20.1045
439	FYN	Tyrosine-protein kinase Fyn	0.0207661	17.09	3798.28	0.477079	31.1019
440	PSMC6	26S proteasome regulatory subunit 10B	0.0207609	28.0678	495.041	0.461327	30.2138
441	UBE2D1	Ubiquitin-conjugating enzyme E2 D1	0.0207523	11.3418	3180.46	0.472448	17.7225
442	POU5F1P3	POU domain transcription factor OCT4-pg3	0.0207047	11.4235	1679.14	0.462741	17.9025
443	POU5F1P4	POU domain protein	0.0207047	11.4235	1679.14	0.462741	17.9025
444	POU5F1	POU domain, class 5, transcription factor 1	0.0207047	11.4235	1679.14	0.462741	17.9025
445	PSMA2	Proteasome subunit alpha type-2	0.0206521	27.7812	501.638	0.462458	31.5777
446	TP73	Tumor protein p73	0.0206389	14.8361	904.242	0.471857	17.2328
447	MEN1	Menin	0.020609	10.1186	667.416	0.471415	11.359
448	CALR	Calreticulin	0.020603	14.678	1605.67	0.480573	18.6158
449	UHRF1	E3 ubiquitin-protein ligase UHRF1	0.020571	14.8545	492.303	0.458942	15.7073
450	DEK	Protein DEK	0.0205227	13.8542	322.178	0.461327	14.474
451	RAN	GTP-binding nuclear protein Ran	0.020502	11.1087	542.431	0.476326	11.8981
452	HMGA1	High mobility group protein HMG-I/HMG-Y	0.0204908	13.0909	780.16	0.471268	14.5485
453	MARS	Methionine--tRNA ligase	0.0204291	11.8684	311.143	0.476025	12.6892
454	IFI16	Gamma-interferon-inducible protein 16	0.0204058	6.49462	3755.98	0.473189	12.6276
455	MAPRE1	Microtubule-associated protein RP/EB family member 1	0.0203994	13.7377	1199.11	0.473486	16.5559
456	PSMD3	26S proteasome non-ATPase regulatory subunit 3	0.0203693	23.7377	668.04	0.455341	26.2664
457	IQCB1	IQ calmodulin-binding motif-containing protein 1	0.0203601	8.24051	2453.11	0.458942	11.1817
458	SLC25A3	Solute carrier family 25 member 3	0.0203458	13.1364	658.64	0.454929	14.8315
459	ESR2	Estrogen receptor beta	0.0203096	12.8105	4299.27	0.484586	25.7898
460	ERBB2	Receptor tyrosine-protein kinase erbB-2	0.0201882	15.5652	5367.26	0.492815	30.263
461	CBX3	Chromobox protein homolog 3	0.0201514	16.8113	623.749	0.44579	18.1784
462	DKC1	H/ACA ribonucleoprotein complex subunit 4	0.0201037	15.9216	460.927	0.465597	18.0603
463	NCOA6	Nuclear receptor coactivator 6	0.0200004	17.9565	1273.46	0.484119	23.3603
464	GADD45A	Growth arrest and DNA damage-inducible protein GADD45 alpha	0.0199512	9.48438	2271.02	0.474678	13.1922
465	PSMC4	26S proteasome regulatory subunit 6B	0.0199043	26.3621	418.995	0.459921	28.5462
466	SRSF6	Serine/arginine-rich splicing factor 6	0.0198901	15.6176	66.2217	0.474976	16.0909
467	SMC1A	Structural maintenance of chromosomes protein 1A	0.0198683	12.2083	653.461	0.478592	13.5702
468	PSMC1	26S proteasome regulatory subunit 4	0.0198438	24.0476	1361.66	0.469362	26.8535
469	BAG6	Large proline-rich protein BAG6	0.0198278	9.47059	4118.68	0.473932	15.0821
470	GTPBP4	Nucleolar GTP-binding protein 1	0.0198209	14.95	271.124	0.46388	16.6226
471	CARM1	Histone-arginine methyltransferase CARM1	0.0197646	11.8654	577.212	0.46331	12.8227
472	DNAJC7	DnaJ homolog subfamily C member 7	0.0196811	16.2791	304.74	0.466605	17.0971
473	GNB2	Guanine nucleotide-binding protein G(I)/G(S)/G(T) subunit beta-2	0.0196511	7.56	814.999	0.48443	8.31488
474	MTOR	Serine/threonine-protein kinase mTOR	0.0196218	12.7679	556.249	0.476627	13.6362
475	DNMT1	DNA (cytosine-5)-methyltransferase 1	0.0195487	15.9825	643.478	0.472153	17.8494
476	CFTR	Cystic fibrosis transmembrane conductance regulator	0.0195434	9.7875	2308.93	0.465166	13.8213
477	EZR	Ezrin	0.0195372	11.4615	1921.93	0.470533	14.9511
478	RRP1B	Ribosomal RNA processing protein 1 homolog B	0.0195095	13.8947	144.868	0.467907	14.6157
479	YBX3	Y-box-binding protein 3	0.0194938	11.6098	385.408	0.468925	12.394
480	CAPZB	F-actin-capping protein subunit beta	0.0194738	9.58974	424.489	0.473783	10.1653
481	MYO1C	Unconventional myosin-Ic	0.0194635	12.8548	1278.17	0.484741	16.5203
482	TIMM50	Mitochondrial import inner membrane translocase subunit TIM50	0.0194632	8.07143	652.989	0.462741	8.37707
483	FTSJ3	pre-rRNA processing protein FTSJ3	0.019419	18.1282	137.192	0.45755	18.848
484	PSMA1	Proteasome subunit alpha type-1	0.0193793	24.9062	931.291	0.468488	28.4484
485	PPIB	Peptidyl-prolyl cis-trans isomerase B	0.0193694	9.8913	455.36	0.473783	10.395
486	IGF1R	Insulin-like growth factor 1 receptor	0.0193609	15.6607	1713.49	0.486774	18.8822
487	PRPF6	Pre-mRNA-processing factor 6	0.0193212	15.3182	248.862	0.47423	16.0039
488	ERBB3	Receptor tyrosine-protein kinase erbB-3	0.0193171	14.8571	2310.66	0.456443	22.1008
489	FBXW7	F-box/WD repeat-containing protein 7	0.0192666	11.3696	4632.81	0.470533	23.1013
490	RXRA	Retinoic acid receptor RXR-alpha	0.019252	15.7157	7766.34	0.488982	35.9445
491	TTN	Titin	0.0192295	11.4038	1191.99	0.464165	13.6727
492	CASP3	Caspase-3	0.019137	11.6329	1863.31	0.477079	16.2711
493	PTMA	Prothymosin alpha	0.0190823	9.81481	552.108	0.466028	10.1899
494	ACTN4	Alpha-actinin-4	0.0189973	10.9038	1429.17	0.484897	12.8808
495	RANBP9	Ran-binding protein 9	0.0189149	10.6786	1250.69	0.492976	12.1994
496	LYN	Tyrosine-protein kinase Lyn	0.0188855	13.2388	2138.72	0.474081	17.6539
497	FUBP1	Far upstream element-binding protein 1	0.0187669	9.80952	532.5	0.469216	10.6126
498	DHX30	Putative ATP-dependent RNA helicase DHX30	0.0187438	10.973	427.834	0.469071	11.6528
499	POLR2E	RNA polymerase II subunit E	0.0187275	14.3455	1360.78	0.479048	20.1304
500	TRIM24	Transcription intermediary factor 1-alpha	0.0187188	13.087	274.488	0.473932	13.5536
501	SKP2	S-phase kinase-associated protein 2	0.0186837	13.8113	824.458	0.478592	15.8715
502	MTHFD1	Methylenetetrahydrofolate dehydrogenase, cyclohydrolase and formyltetrahydrofolate synthetase 1	0.0186039	12.2258	161.416	0.469655	13.0974
503	FAF2	FAS-associated factor 2	0.0185694	10.871	1312.91	0.456167	14.8195
504	CHD3	Chromodomain-helicase-DNA-binding protein 3	0.0185215	13.8167	1114.41	0.479962	16.194
505	IRS1	Insulin receptor substrate 1	0.018517	16.5614	851.561	0.488666	18.9088
506	TRIM29	Tripartite motif-containing protein 29	0.0185052	7.27778	582.353	0.443302	7.7509
507	MSH2	DNA mismatch repair protein Msh2	0.0185002	11.7059	774.277	0.479809	12.5115
508	PDIA3	Protein disulfide-isomerase A3	0.0185	11.2273	1145.09	0.479962	12.3609
509	ANP32B	Acidic leucine-rich nuclear phosphoprotein 32 family member B	0.0184892	7.56522	657.453	0.473486	8.03896
510	CASP8	Caspase-8	0.0184416	11.725	4104.62	0.478744	19.1605
511	ITCH	E3 ubiquitin-protein ligase Itchy homolog	0.018399	11.4062	1690.39	0.476326	14.2934
512	DSP	Desmoplakin	0.0183644	10.0465	451.078	0.457273	10.7519
513	RSL1D1	Ribosomal L1 domain-containing protein 1	0.0183644	14	83.4677	0.466749	14.4677
514	G3BP2	Ras GTPase-activating protein-binding protein 2	0.0183607	11.1212	154.42	0.47171	11.6945
515	BRIX1	Ribosome biogenesis protein BRX1 homolog	0.0183597	18.6286	176.369	0.437265	19.3191
516	DYNLL1	Dynein light chain 1	0.0183203	9.57576	2444.3	0.465885	12.9554
517	HDAC9	Histone deacetylase 9	0.0183105	13.8235	331.605	0.458384	14.5717
518	PTK2	Focal adhesion kinase 1	0.0182709	17.7647	1391.32	0.477985	22.8692
519	WHSC1	Histone-lysine N-methyltransferase NSD2	0.0181932	10.8085	363.653	0.463025	11.4416
520	PTGES3	Prostaglandin E synthase 3	0.0181907	12	968.52	0.483344	13.8713
521	SMARCA2	Probable global transcription activator SNF2L2	0.0181471	14.9672	713.118	0.47171	17.3052
522	CSNK1A1	Casein kinase I isoform alpha	0.0181422	10.6977	482.929	0.467183	11.4619
523	PRKCZ	Protein kinase C zeta type	0.0181126	14.1207	1079.91	0.487246	16.6136
524	ZBTB16	Zinc finger and BTB domain-containing protein 16	0.018063	14.0333	1364.95	0.479504	16.2969
525	DNAJA3	DnaJ homolog subfamily A member 3	0.0179708	11.6047	327.288	0.472153	11.8906
526	INPPL1	Phosphatidylinositol 3,4,5-trisphosphate 5-phosphatase 2	0.0179691	14.5814	337.087	0.460763	15.8154
527	CEBPB	CCAAT/enhancer-binding protein beta	0.0178987	19.2833	1020.77	0.486617	21.9408
528	ACTN1	Alpha-actinin-1	0.017889	10.7778	1101.73	0.481186	12.8435
529	TAF9	Transcription initiation factor TFIID subunit 9	0.0178345	11.5	898.418	0.446318	13.4031
530	NFKBIB	NF-kappa-B inhibitor beta	0.0178243	12.6875	511.159	0.462741	13.4798
531	DYRK1A	Dual specificity tyrosine-phosphorylation-regulated kinase 1A	0.0178178	12.0208	575.453	0.467038	12.8108
532	NR4A1	Nuclear receptor subfamily 4 group A member 1	0.0178041	12.7931	903.699	0.463168	14.131
533	RRP12	RRP12-like protein	0.0176662	11.7097	101.944	0.461186	12.2
534	TBL1XR1	F-box-like/WD repeat-containing protein TBL1XR1	0.017623	12.093	216.453	0.471562	12.5932
535	TOP2B	DNA topoisomerase 2-beta	0.0175635	14.4651	221.403	0.471415	14.9971
536	PSMA4	Proteasome subunit alpha type-4	0.0175623	26.3091	480.59	0.457134	28.0906
537	ACTR2	Actin-related protein 2	0.0174993	12.34	1040.26	0.476476	14.6917
538	NAP1L4	Nucleosome assembly protein 1-like 4	0.0174901	11.8611	167.989	0.460623	12.2412
539	AIFM1	Apoptosis inducing factor mitochondria associated 1	0.017469	9.69444	375.637	0.475276	10.0952
540	EIF3I	Eukaryotic translation initiation factor 3 subunit I	0.0174448	8.58974	285.206	0.467327	8.96108
541	BCLAF1	Bcl-2-associated transcription factor 1	0.0174069	10.1429	178.518	0.473338	10.5235
542	CTTN	Src substrate cortactin	0.0173965	11.3269	1042.43	0.468052	13.1831
543	MTA2	Metastasis-associated protein MTA2	0.0173543	13.4667	419.3	0.472744	15.1439
544	CBX1	Chromobox protein homolog 1	0.0173466	14.5306	326.66	0.435498	15.229
545	POLR2B	DNA-directed RNA polymerase II subunit RPB2	0.0173199	11.54	1273.43	0.485053	15.8915
546	HMGB1	High mobility group protein B1	0.0172903	9.98246	1210.64	0.467762	11.3141
547	IMMT	MICOS complex subunit MIC60	0.0172875	9.95556	481.105	0.466605	10.3908
548	FLNB	Filamin-B	0.0171436	11.122	468.795	0.470974	11.7091
549	RAC1	Ras-related C3 botulinum toxin substrate 1	0.0171246	9.91667	1793.58	0.460482	11.9501
550	HSPA6	Heat shock 70 kDa protein 6	0.0170731	13.8158	110.996	0.458663	14.1892
551	CDH1	Cadherin-1	0.0169911	9.86154	1952.56	0.471268	13.3674
552	CEBPA	CCAAT/enhancer-binding protein alpha	0.0169204	15.4667	1293.57	0.479809	18.8494
553	FOXO3	Forkhead box protein O3	0.0168821	12.5778	422.721	0.476326	13.0811
554	UCHL1	Ubiquitin carboxyl-terminal hydrolase isozyme L1	0.0168741	9.8	519.857	0.469947	10.1862
555	UBR5	E3 ubiquitin-protein ligase UBR5	0.0168709	11.0889	403.253	0.465166	11.4313
556	UBTF	Nucleolar transcription factor 1	0.0168641	10.8409	435.602	0.47423	11.5603
557	SYK	Tyrosine-protein kinase SYK	0.0167697	16.3651	1690.05	0.467183	20.2435
558	SMAD1	Mothers against decapentaplegic homolog 1	0.0167485	12.9219	1644.23	0.474081	16.3117
559	BCL2	Apoptosis regulator Bcl-2	0.0167473	11.3333	1404.3	0.463594	13.9581
560	DDX27	Probable ATP-dependent RNA helicase DDX27	0.016632	14.6	48.7404	0.453153	15.1034
561	CDK5	Cyclin-dependent-like kinase 5	0.0166292	11.5263	1402.93	0.476476	13.2159
562	MTA1	Metastasis-associated protein MTA1	0.0166278	12.3396	1019.23	0.477834	15.099
563	PFN1	Profilin-1	0.0165981	10.5161	165.961	0.469801	10.9174
564	TCERG1	Transcription elongation regulator 1	0.0164579	9.8718	295.777	0.468343	10.3263
565	PIAS1	E3 SUMO-protein ligase PIAS1	0.0164069	14.1311	1696.75	0.487088	17.3386
566	RNF20	E3 ubiquitin-protein ligase BRE1A	0.0163972	9.09302	368.894	0.451121	10.0312
567	TSG101	Tumor susceptibility gene 101 protein	0.016372	9.76786	1506.6	0.473783	12.5925
568	AHNAK	Neuroblast differentiation-associated protein AHNAK	0.0163703	13.7222	146.427	0.47024	14.4146
569	FKBP4	Peptidyl-prolyl cis-trans isomerase FKBP4	0.0163201	12.8889	384.203	0.48134	13.8249
570	UBE2L3	Ubiquitin-conjugating enzyme E2 L3	0.0162741	10.8	1397.07	0.462316	13.7302
571	SSR4	Translocon-associated protein subunit delta	0.0162725	9.14286	192.194	0.446582	9.54218
572	REL	Proto-oncogene c-Rel	0.0162022	10.8214	1173.39	0.464165	12.242
573	TRAF1	TNF receptor-associated factor 1	0.0161695	11.1639	1363.62	0.456719	14.7924
574	KRT1	Keratin, type II cytoskeletal 1	0.016141	10.0312	149.951	0.465453	10.4082
575	HIST1H2BD	Histone H2B type 1-D	0.0161147	5	687.123	0.46531	5.55985
576	DNMT3L	DNA (cytosine-5)-methyltransferase 3-like	0.0161037	7.46429	1143.99	0.464022	9.02248
577	MAX	Protein max	0.0160578	9.61818	1062.94	0.460061	12.1045
578	RELB	Transcription factor RelB	0.0160569	10.0612	557.08	0.452338	10.5829
579	PGR	Progesterone receptor	0.0160233	11.1967	1001.87	0.474379	15.5018
580	PPARGC1A	Peroxisome proliferator-activated receptor gamma coactivator 1-alpha	0.0159849	11.9298	1412.02	0.485053	14.4223
581	PSMD12	26S proteasome non-ATPase regulatory subunit 12	0.0159591	26.9057	380.605	0.442004	28.7863
582	SNRPB	Small nuclear ribonucleoprotein-associated proteins B and B'	0.015955	12.125	269.888	0.430897	12.9277
583	SSBP1	Single stranded DNA binding protein 1	0.015936	11.8125	195.651	0.447907	12.4044
584	RAD50	DNA repair protein RAD50	0.0159341	8.54839	172.871	0.465741	8.85
585	HNF4A	Hepatocyte nuclear factor 4-alpha	0.0159032	15	1349.38	0.477079	19.4917
586	ANP32A	Acidic leucine-rich nuclear phosphoprotein 32 family member A	0.0158866	7.975	444.466	0.466172	8.53424
587	SERPINH1	Serpin H1	0.0158859	7.28947	621.648	0.475575	8.11454
588	MYOD1	Myoblast determination protein 1	0.0158775	13.2292	595.431	0.475126	14.1085
589	LCK	Tyrosine-protein kinase Lck	0.0158044	14.4531	2011.39	0.490253	19.9673
590	STRAP	Serine-threonine kinase receptor-associated protein	0.0157457	8.89474	318.645	0.463737	9.39447
591	EIF4G1	Eukaryotic translation initiation factor 4 gamma 1	0.0156821	9.93939	281.329	0.467472	10.9097
592	ATAD3A	ATPase family AAA domain-containing protein 3A	0.0156791	6.51852	481.638	0.463737	6.89231
593	NASP	Nuclear autoantigenic sperm protein	0.0156765	8.95238	472.425	0.445922	9.56984
594	APC	Adenomatous polyposis coli protein	0.0156499	8.50794	2398.84	0.468197	11.6447
595	SAFB	Scaffold attachment factor B1	0.0156083	11.4848	596.447	0.467617	12.5761
596	VDR	Vitamin D3 receptor	0.0155728	14.7465	1561.51	0.459501	20.2558
597	CREB1	Cyclic AMP-responsive element-binding protein 1	0.0155227	13.0448	2057.86	0.46388	19.0373
598	HSPA2	Heat shock-related 70 kDa protein 2	0.0155108	11.9459	266.459	0.464022	12.4644
599	RPN2	Dolichyl-diphosphooligosaccharide--protein glycosyltransferase subunit 2	0.0154765	9.38889	373.875	0.464737	9.88375
600	GANAB	Neutral alpha-glucosidase AB	0.0153366	8.97561	503.571	0.447509	9.72806
601	GOLGA2	Golgin subfamily A member 2	0.0153287	6.18966	2730.86	0.480726	8.50151
602	HIST1H2BG	Histone H2B type 1-G	0.0153119	4.625	641.063	0.464737	5.14127
603	HIST1H2BE	Histone H2B type 1-E	0.0153119	4.625	641.063	0.464737	5.14127
604	HIST1H2BF	Histone H2B type 1-F	0.0153119	4.625	641.063	0.464737	5.14127
605	HIST1H2BI	Histone H2B type 1-I	0.0153119	4.625	641.063	0.464737	5.14127
606	HIST1H2BC	Histone H2B type 1-C	0.0153119	4.625	641.063	0.464737	5.14127
607	TLE1	Transducin-like enhancer protein 1	0.0152986	9.93877	708.33	0.433745	10.7807
608	THRA	Thyroid hormone receptor alpha	0.0152225	12.5082	1209.57	0.472596	16.3421
609	SHMT2	Serine hydroxymethyltransferase 2	0.0152218	9.70588	811.529	0.471415	10.7043
610	KRT10	Keratin, type I cytoskeletal 10	0.0152163	9.46667	134.259	0.468052	9.7931
611	TFG	Protein TFG	0.0151987	9.25	2417.81	0.450313	10.3769
612	PLCG1	1-phosphatidylinositol 4,5-bisphosphate phosphodiesterase gamma-1	0.0151948	14.8971	1771.63	0.465023	22.7308
613	KAT7	Histone acetyltransferase KAT7	0.0151783	7.875	326.158	0.451526	8.21427
614	CDK8	Cyclin-dependent kinase 8	0.0151754	16.7429	1765.02	0.472744	25.4661
615	TOPBP1	DNA topoisomerase 2-binding protein 1	0.0151576	6.69048	1329.54	0.459081	7.99886
616	HIST2H3A	Histone H3.2	0.0151468	5.10909	678.098	0.448173	5.79157
617	HIST2H3D	Histone H3.2	0.0151468	5.10909	678.098	0.448173	5.79157
618	HIST2H3C	Histone H3.2	0.0151468	5.10909	678.098	0.448173	5.79157
619	COPS3	COP9 signalosome complex subunit 3	0.0151326	13.2333	138.884	0.453017	13.9338
620	PRDX2	Peroxiredoxin-2	0.0151249	10.7632	861.713	0.470974	12.4163
621	BRD4	Bromodomain-containing protein 4	0.0150683	9.85417	475.683	0.433372	10.7975
622	PGAM5	Serine/threonine-protein phosphatase PGAM5	0.0150465	8.17857	128.953	0.464308	8.48148
623	SETD7	Histone-lysine N-methyltransferase SETD7	0.0149746	11.3902	301.871	0.451796	11.9714
624	TAF1	Transcription initiation factor TFIID subunit 1	0.0149341	12.3182	265.96	0.435498	13.7164
625	PSMD13	26S proteasome non-ATPase regulatory subunit 13	0.0149153	24.12	320.127	0.449911	25.1994
626	FHL2	Four and a half LIM domains protein 2	0.0148976	12.25	1256.28	0.482571	15.14
627	PRMT3	Protein arginine N-methyltransferase 3	0.0148956	5.93333	143.43	0.447376	6.14693
628	MYL6	Myosin light polypeptide 6	0.0148647	7.93548	173.113	0.46488	8.87024
629	CCNE1	G1/S-specific cyclin-E1	0.0148418	10.2667	581.015	0.462883	11.5813
630	ACLY	ATP-citrate synthase	0.0148292	8.96774	264.932	0.4626	9.36191
631	CAPRIN1	Caprin-1	0.0147993	11.32	68.0532	0.466316	11.7917
632	MED1	Mediator of RNA polymerase II transcription subunit 1	0.0147907	18.8525	1194.27	0.477834	26.9212
633	TAF1B	TATA box-binding protein-associated factor RNA polymerase I subunit B	0.0147409	12.6579	292.079	0.461468	13.3339
634	SUV39H1	Histone-lysine N-methyltransferase SUV39H1	0.0147398	13.6296	1113.31	0.466605	14.8652
635	ZYX	Zyxin	0.0147365	6.64286	565.705	0.439173	7.2749
636	CDK7	Cyclin-dependent kinase 7	0.0147319	11.6429	412.398	0.475126	12.5714
637	KARS	Lysine--tRNA ligase	0.01473	9.11765	289.872	0.466461	9.73913
638	MAP2K1	Dual specificity mitogen-activated protein kinase kinase 1	0.0147246	12.6458	610.798	0.46488	13.5146
639	DNM2	Dynamin-2	0.0147018	8.3617	977.447	0.465741	9.40859
640	FOXO1	Forkhead box protein O1	0.0146968	14.2927	394.961	0.485053	15.0695
641	HGS	Hepatocyte growth factor-regulated tyrosine kinase substrate	0.0146172	7.83636	1652.82	0.467762	9.82401
642	KIF11	Kinesin-like protein KIF11	0.0145986	7.14286	1045.15	0.451526	8.72327
643	VAPA	Vesicle-associated membrane protein-associated protein A	0.0145884	9.36956	1720.38	0.458106	12.3998
644	TCF4	Transcription factor 4	0.0145313	9.30909	1622.95	0.467472	11.6443
645	DCAF7	DDB1- and CUL4-associated factor 7	0.0145157	9.475	430.458	0.459221	9.88506
646	PSMD7	26S proteasome non-ATPase regulatory subunit 7	0.0144215	23.5	702.927	0.452067	25.5431
647	HAX1	HCLS1-associated protein X-1	0.0143904	7	1452.6	0.482109	8.68619
648	RBM28	RNA-binding protein 28	0.0143756	12.04	69.0021	0.456029	12.5417
649	EPPK1	Epiplakin	0.0143443	7.5	130.517	0.470093	7.78667
650	ASF1A	Histone chaperone ASF1A	0.0143125	11.5625	155.975	0.449375	12.0461
651	MED23	Mediator of RNA polymerase II transcription subunit 23	0.0142979	14	1729.42	0.473635	22.0369
652	PPP5C	Serine/threonine-protein phosphatase 5	0.0142965	12.0588	376.209	0.479048	12.9564
653	PSMD6	6S proteasome non-ATPase regulatory subunit 6	0.0142668	25.2917	328.668	0.449911	26.5877
654	CLU	Clusterin	0.0142549	9.7	962.774	0.469655	10.8885
655	TFRC	Transferrin receptor protein 1	0.0142377	6.53846	272.913	0.473932	6.9254
656	DDX6	Probable ATP-dependent RNA helicase DDX6	0.0142315	7.41379	208.373	0.44487	7.73333
657	SMARCE1	SWI/SNF-related matrix-associated actin-dependent regulator of chromatin subfamily E member 1	0.0142303	11.8043	462.876	0.475425	12.7533
658	CALU	Calumenin	0.0142089	8.79487	533.163	0.459221	9.89014
659	ING1	Inhibitor of growth protein 1	0.0142081	11.4722	159.004	0.46388	11.8841
660	PPID	Peptidyl-prolyl cis-trans isomerase D	0.0141703	9.06897	179.61	0.478288	9.41857
661	GSN	Gelsolin	0.0141461	9.85714	457.178	0.480726	10.3855
662	PTPN11	Tyrosine-protein phosphatase non-receptor type 11	0.0140986	15.125	2604.55	0.468488	20.5484
663	SH3KBP1	SH3 domain-containing kinase-binding protein 1	0.0140615	11.5714	1667.92	0.454108	15.4582
664	TIA1	Nucleolysin TIA-1 isoform p40	0.0140527	8.73077	81.7356	0.452745	9.08
665	ARHGDIA	Rho GDP-dissociation inhibitor 1	0.0140474	9.47619	954.525	0.470387	10.7409
666	STK11	Serine/threonine-protein kinase STK11	0.0140419	10.14	1210.5	0.457273	12.1547
667	TRRAP	Transformation/transcription domain-associated protein	0.0140408	10.8696	1268.53	0.466605	12.9176
668	PRKAB1	5'-AMP-activated protein kinase subunit beta-1, AMPK subunit beta-1	0.0140223	5.01754	1176.87	0.445922	6.76682
669	TSC2	Tuberin	0.0139845	9.8718	495.345	0.4792	10.5379
670	CIRBP	Cold-inducible RNA-binding protein	0.0139735	9.07143	189.331	0.46175	9.48952
671	ETS1	Protein C-ets-1	0.0139473	13.4167	679.277	0.459081	15.0506
672	MKI67	Proliferation marker protein Ki-67	0.0139378	10.4194	178.492	0.464594	10.8
673	DCTN1	Dynactin subunit 1	0.013903	8.63462	930.072	0.462033	10.3909
674	PARK7	Protein/nucleic acid deglycase DJ-1	0.0138525	10.6842	317.305	0.453017	11.1631
675	SGK1	Serine/threonine-protein kinase Sgk1	0.0137946	8.85106	702.943	0.442392	9.81522
676	KLF5	Krueppel-like factor 5	0.0137884	13.25	387.609	0.480115	13.9345
677	DNAJB11	DnaJ homolog subfamily B member 11	0.0137719	8.51852	360.563	0.469508	9.07076
678	BCAS2	Pre-mRNA-splicing factor SPF27	0.0137716	10.2258	218.26	0.465885	10.5971
679	PRKAA1	5'-AMP-activated protein kinase catalytic subunit alpha-1	0.0137415	8.78947	442.005	0.460904	9.50865
680	PPP2CB	Serine/threonine-protein phosphatase 2A catalytic subunit beta isoform	0.0136853	8.95652	1173.15	0.473041	10.1058
681	PSMD8	26S proteasome non-ATPase regulatory subunit 8	0.0136733	27.0952	119.175	0.44097	27.775
682	KAT6A	Histone acetyltransferase KAT6A	0.0136141	7.6129	105.819	0.450852	7.86667
683	EIF5AL1	Eukaryotic translation initiation factor 5A-1-like	0.0135979	8.5	66.1191	0.463168	8.86956
684	ATR	Serine/threonine-protein kinase ATR	0.0135532	8.97561	1136.25	0.458523	10.2378
685	RASA1	Ras GTPase-activating protein 1	0.0135309	12.6491	1620.11	0.469801	15.3446
686	NME1-NME2	Nucleoside diphosphate kinase	0.0135243	9.7907	400.822	0.464022	10.5022
687	NME2	Nucleoside diphosphate kinase B	0.0135243	9.7907	400.822	0.464022	10.5022
688	MYO6	Unconventional myosin-VI	0.0135074	11.5161	185.302	0.471562	12.0636
689	LUC7L3	Luc7-like protein 3	0.0134923	10.4	180.811	0.456581	10.8541
690	RUNX2	Runt-related transcription factor 2	0.013464	12.1333	414.553	0.445001	12.8867
691	SVIL	Supervillin	0.0134349	9.14894	1132.49	0.478896	10.2852
692	RHOA	Transforming protein RhoA	0.0134193	9.02083	932.003	0.449107	10.5658
693	ARF6	ADP-ribosylation factor 6	0.0133783	5.44898	980.843	0.44804	6.81787
694	FIP1L1	Pre-mRNA 3'-end-processing factor FIP1	0.0133337	7.6	158.394	0.47423	7.93452
695	ATXN1	Ataxin-1	0.0133335	7.26667	1939.26	0.445527	10.2749
696	ATXN3	Ataxin-3	0.0132882	10.0889	610.594	0.458245	11.0438
697	EIF5A	Eukaryotic translation initiation factor 5A-1	0.0132265	8.31818	49.5409	0.461468	8.71429
698	PIAS4	E3 SUMO-protein ligase PIAS4	0.0131729	9.38462	1021.43	0.450986	10.6912
699	LARS	Leucyl-tRNA synthetase	0.0131393	8.8	128.961	0.460623	9.20098
700	SMARCD1	SWI/SNF-related matrix-associated actin-dependent regulator of chromatin subfamily D member 1	0.0131326	10.2791	723.832	0.473783	11.6694
701	NUP153	Nuclear pore complex protein Nup153	0.0131209	9.74286	703.267	0.474528	10.9962
702	RBL1	Retinoblastoma-like protein 1	0.0131181	11.0465	574.616	0.455341	12.1972
703	BTK	Tyrosine-protein kinase BTK	0.0131151	11.2391	1126.08	0.454381	13.0553
704	TRIM21	E3 ubiquitin-protein ligase TRIM21	0.0130958	8.4	297.72	0.454792	8.76801
705	FKBP5	Peptidyl-prolyl cis-trans isomerase FKBP5	0.0130924	10.5946	441.81	0.478137	11.2514
706	CDK6	Cyclin-dependent kinase 6	0.0130836	10.05	486.973	0.458106	10.798
707	ATF3	Cyclic AMP-dependent transcription factor ATF-3	0.0130307	13.4359	500.614	0.44884	15.0696
708	AKAP8	A-kinase anchor protein 8	0.0130238	7.96	61.7015	0.458802	8.29167
709	PSMD14	26S proteasome non-ATPase regulatory subunit 14	0.0130214	25.5714	362.149	0.450717	26.8611
710	RPS6KA1	Ribosomal protein S6 kinase alpha-1	0.0129503	9.3	760.879	0.476627	10.2135
711	MMS19	MMS19 nucleotide excision repair protein homolog	0.0129332	7.05405	591.211	0.473338	7.92589
712	GRWD1	Glutamate-rich WD repeat-containing protein 1	0.012862	9.5	45.0422	0.461609	10
713	U2SURP	U2 snRNP-associated SURP motif-containing protein	0.0128423	7.05263	29.2003	0.454381	7.44444
714	DCTN2	Dynactin subunit 2	0.0128339	11.4324	314.691	0.457273	11.8292
715	HDAC7	Histone deacetylase 7	0.0128016	12.8286	682.884	0.468343	13.6993
716	EPB41L3	Band 4.1-like protein 3	0.0126938	8.26191	660.604	0.447774	9.23079
717	CORO1C	Coronin-1C	0.0126628	9.30303	195.408	0.465885	9.6546
718	NFE2L2	Nuclear factor erythroid 2-related factor 2	0.0126527	8.40909	1091.91	0.456996	9.88353
719	UBQLN1	Ubiquilin-1	0.0126219	9.76	1474.1	0.456996	11.9659
720	ADRM1	Proteasomal ubiquitin receptor ADRM1	0.0126194	24.7556	275.556	0.439429	25.4677
721	THRB	Thyroid hormone receptor beta	0.0125944	10.6852	1653.42	0.469216	14.3002
722	EHMT2	Histone-lysine N-methyltransferase EHMT2	0.0125417	10.6304	521.206	0.462458	11.3684
723	TRIM25	E3 ubiquitin/ISG15 ligase TRIM25	0.0124898	7.88235	326.579	0.460482	8.3538
724	POLR2C	RNA polymerase II subunit C	0.0124705	13.093	710.036	0.466605	17.3325
725	SMURF2	E3 ubiquitin-protein ligase SMURF2	0.0124574	9.48936	747.61	0.450852	10.636
726	YTHDF2	YTH domain-containing family protein 2	0.0124571	6.33333	30.4137	0.465166	6.70588
727	SAFB2	Scaffold attachment factor B2	0.0124147	10.4762	25.2741	0.452609	11
728	UBAP2L	Ubiquitin-associated protein 2-like	0.0123916	6.28571	72.8895	0.459781	6.6
729	2018-09-02		0.0123651	7.58064	284.422	0.464022	8.32466
730	FKBP8	Peptidyl-prolyl cis-trans isomerase FKBP8	0.012363	19.7447	925.032	0.440713	20.9391
731	KIAA1549	UPF0606 protein KIAA1549	0.0123463	13.6154	412.229	0.433123	14.5288
732	TUBB1	Tubulin beta-1 chain	0.0123157	6.95652	458.953	0.456719	7.27273
733	IRS2	Insulin receptor substrate 2	0.0122515	11.6176	256.283	0.473041	12.0975
734	STAT5A	Signal transducer and activator of transcription 5A	0.0122452	12.5122	462.184	0.473635	12.9129
735	TMOD3	Tropomodulin-3	0.0122351	8.37931	155.807	0.458663	8.67857
736	LRIF1	Ligand-dependent nuclear receptor-interacting factor 1	0.01223	6.92453	1470.35	0.462316	8.71843
737	PRKCB	Protein kinase C beta type	0.0121999	9.31818	784.388	0.455204	10.4653
738	PSPC1	Paraspeckle component 1	0.0121912	7.36364	76.3174	0.4626	7.71429
739	TFAP2A	Transcription factor AP-2-alpha	0.012186	8	462.123	0.453017	8.47722
740	HRAS	GTPase HRas	0.0121593	8.6	2510.58	0.457967	13.7286
741	HDLBP	Vigilin	0.0121208	6.68966	434.541	0.468052	7.12224
742	TCOF1	Treacle protein	0.0121011	7.43478	67.7943	0.457689	7.77273
743	RAD51	DNA repair protein RAD51 homolog 1	0.0120858	8.73684	1551.72	0.469362	10.3224
744	WHSC1L1	Wolf-Hirschhorn syndrome candidate 1-like 1	0.0120842	7.61111	238.583	0.436885	7.99301
745	ANXA7	Annexin A7	0.0120743	4.46341	501.393	0.448307	4.80152
746	BRAF	Serine/threonine-protein kinase B-raf	0.0120647	14.5	195.152	0.429181	15.2232
747	NRIP1	Nuclear receptor-interacting protein 1	0.0120585	8.66667	982.767	0.475276	10.4914
748	RBFOX2	RNA binding protein fox-1 homolog 2	0.0120329	9.64516	407.082	0.457828	10.5781
749	EID1	EP300-interacting inhibitor of differentiation 1	0.0120229	6.4	120.572	0.413651	6.64266
750	SUPT6H	Transcription elongation factor SPT6	0.0120102	6.72	382.838	0.463168	7.04426
751	USP11	Ubiquitin carboxyl-terminal hydrolase 11	0.011966	7.90244	734.57	0.455341	9.13651
752	HMGB2	High mobility group protein B2	0.0119653	6.5625	211.724	0.458523	6.99752
753	RCN1	Reticulocalbin-1	0.0119605	7.5625	306.266	0.431636	7.8365
754	FLII	Protein flightless-1 homolog	0.0119408	8.82759	206.538	0.464165	9.33444
755	ATP2A2	Sarcoplasmic/endoplasmic reticulum calcium ATPase 2	0.0119176	6.3	238.563	0.44884	6.79388
756	MRPS9	Mitochondrial ribosomal protein S9	0.0119147	8.47619	71.5051	0.457134	8.9
757	POP1	Ribonucleases P/MRP protein subunit POP1	0.0118949	9.36	137.71	0.456996	9.75
758	PSIP1	PC4 and SFRS1-interacting protein	0.0118657	6.9	183.942	0.453562	7.13793
759	STOM	Erythrocyte band 7 integral membrane protein	0.0118331	9.32	75.1131	0.460623	9.70833
760	PTPN1	Tyrosine-protein phosphatase non-receptor type 1	0.0118219	10	1147.15	0.478288	11.0511
761	VTN	Vitronectin	0.0118163	7.94118	651.983	0.433247	8.41678
762	SREBF1	Sterol regulatory element-binding protein 1	0.0117786	13.1364	530.132	0.467907	14.8163
763	RUNX1	Runt-related transcription factor 1	0.0117745	13	580.091	0.43437	13.8019
764	YARS	Tyrosyl-tRNA synthetase	0.0117274	7.7	49.1355	0.460482	8.13333
765	VAV1	Proto-oncogene vav	0.0116873	12.1522	590.061	0.44579	13.8897
766	PIK3CA	Phosphatidylinositol 4,5-bisphosphate 3-kinase catalytic subunit alpha isoform	0.0116792	7.07273	5917.66	0.476928	11.2353
767	USP16	Ubiquitin carboxyl-terminal hydrolase 16	0.011662	5.76	56.8271	0.447376	6.01136
768	BCL3	B-cell lymphoma 3 protein	0.0116567	10.7879	204.567	0.470533	11.1347
769	ARID1A	AT-rich interactive domain-containing protein 1A	0.0116266	9.75	181.611	0.460482	10.2417
770	NELFB	Negative elongation factor B	0.0116125	9.67742	202.728	0.463594	10.1179
771	GTF2B	Transcription initiation factor IIB	0.0116041	11.2683	451.457	0.45755	12.8902
772	ST13	Hsc70-interacting protein	0.0115409	6.67742	1359.03	0.44487	7.25328
773	XIAP	E3 ubiquitin-protein ligase XIAP	0.0115153	10.7333	1013.2	0.450448	12.2472
774	DNTTIP2	Deoxynucleotidyltransferase terminal-interacting protein 2	0.0114714	3.92308	84.0731	0.437772	4.08
775	SNAI1	Zinc finger protein SNAI1	0.0114593	10.069	200.311	0.445659	10.5367
776	NR0B2	Nuclear receptor subfamily 0 group B member 2	0.0114311	8.02222	1167.4	0.468197	9.66015
777	PRPF4B	Serine/threonine-protein kinase PRP4 homolog	0.0114158	9.32	164.832	0.459081	9.70833
778	RCN2	Reticulocalbin-2	0.0113738	5.79167	92.6245	0.449911	6.05
779	HCK	Tyrosine-protein kinase HCK	0.011305	13.2093	762.895	0.452474	14.941
780	POU2F1	POU domain, class 2, transcription factor 1	0.0112975	10.9211	661.602	0.473635	12.0034
781	TAF1A	TATA box-binding protein-associated factor RNA polymerase I subunit A	0.011274	9.69231	42.5408	0.432999	10.08
782	TUBB6	Tubulin beta-6 chain	0.0112653	5.40741	86.5077	0.432378	5.65201
783	UIMC1	BRCA1-A complex subunit RAP80	0.011255	7.46875	370.644	0.465166	7.86139
784	COPS7A	COP9 signalosome complex subunit 7a	0.0112088	8.03846	297.026	0.43387	8.42583
785	EIF2S2	Eukaryotic translation initiation factor 2 subunit 2	0.0111885	5.7037	344.134	0.469362	6.01803
786	ASH2L	Set1/Ash2 histone methyltransferase complex subunit ASH2	0.0111833	10.225	675.6	0.473189	12.6361
787	ACTR3	Actin-related protein 3	0.0111418	9.13793	312.601	0.461892	9.88277
788	RPS6KA3	Ribosomal protein S6 kinase alpha-3	0.0111306	8.75	580.009	0.4723	9.58761
789	HECW2	E3 ubiquitin-protein ligase HECW2	0.0111255	4.92593	1640.1	0.444477	6.88711
790	DAP3	Death associated protein 3	0.011039	8.63636	69.8918	0.467617	9.06667
791	BAG1	BAG family molecular chaperone regulator 1	0.0110325	7.75	411.48	0.463594	8.01628
792	GNL2	Nucleolar GTP-binding protein 2	0.0110104	8.59091	75.7401	0.456996	9
793	NEDD4L	E3 ubiquitin-protein ligase NEDD4-like	0.010964	9.025	689.62	0.450852	10.1776
794	CSK	Tyrosine-protein kinase CSK	0.0109538	12.1053	361.586	0.450313	13.2851
795	RBBP6	E3 ubiquitin-protein ligase RBBP6	0.0109495	5.3	516.211	0.465885	5.49074
796	MAPKAPK2	MAP kinase-activated protein kinase 2	0.0109315	8.55556	177.393	0.462458	9.05868
797	CDC25B	M-phase inducer phosphatase 2	0.0109246	7.92308	106.188	0.464165	8.24
798	BIRC2	Baculoviral IAP repeat-containing protein 2	0.0108973	11.0889	714.644	0.444085	12.9481
799	RBPJ	Recombining binding protein suppressor of hairless	0.0108815	5.87179	667.043	0.454108	6.57631
800	NSD1	Histone-lysine N-methyltransferase, H3 lysine-36 and H4 lysine-20 specific	0.0108574	3.16129	431.009	0.439942	3.63388
801	NSF	Vesicle-fusing ATPase	0.0108434	7.48148	499.443	0.465885	7.91813
802	NOS3	Nitric oxide synthase, endothelial	0.0108325	7.37705	5900.57	0.476025	18.1777
803	TCEB1	Elongin-C	0.0108199	6.18421	969.423	0.429425	8.78745
804	SLC3A2	4F2 cell-surface antigen heavy chain	0.0107669	6.23077	352.175	0.436632	7.14556
805	KDM4B	Lysine-specific demethylase 4B	0.010764	3.36667	146.625	0.428815	3.55535
806	MYO1B	Unconventional myosin-Ib	0.0107568	9.05556	14.2662	0.461468	9.58823
807	BAX	Apoptosis regulator BAX	0.0107418	8.92683	854.489	0.444215	10.5016
808	RBBP5	Retinoblastoma-binding protein 5	0.0107353	10	345.622	0.464594	11.7618
809	PDGFRB	Platelet-derived growth factor receptor beta	0.0107307	14.913	606.01	0.447642	17.2285
810	FOXM1	Forkhead box protein M1	0.0107161	5.94872	555.471	0.440584	6.39238
811	HDAC8	Histone deacetylase 8	0.0107124	2.42308	77.2372	0.41162	2.52
812	RDX	Radixin	0.0106871	6.48276	394.396	0.466316	6.857
813	KDM4A	Lysine-specific demethylase 4A	0.0106853	13.2692	59.3695	0.401223	14.22
814	MED12	Mediator of RNA polymerase II transcription subunit 12	0.0106729	15.4898	804.364	0.469655	20.1759
815	ATAD2	ATPase family AAA domain-containing protein 2	0.01066	2.96429	86.2565	0.433496	3.07407
816	PPM1B	Protein phosphatase 1B	0.0106253	4.5	293.87	0.443042	4.76424
817	KRT8	Keratin, type II cytoskeletal 8	0.0106227	7	171.417	0.467327	7.28862
818	DDX20	Probable ATP-dependent RNA helicase DDX20	0.0106208	9.29032	238.082	0.456996	9.64317
819	SMC4	Structural maintenance of chromosomes protein 4	0.010609	7.32143	195.608	0.458942	8.67678
820	AP2A2	AP-2 complex subunit alpha-2	0.0106036	9	94.2365	0.471857	9.42857
821	TRIP12	E3 ubiquitin-protein ligase TRIP12	0.0105935	4.46667	270.736	0.458942	4.68046
822	OPTN	Optineurin	0.0105886	8.73529	548.011	0.435875	10.3417
823	CBR1	Carbonyl reductase [NADPH] 1	0.0105754	6.15789	128.645	0.464165	6.57222
824	PIAS2	E3 SUMO-protein ligase PIAS2	0.010558	10.2571	721.802	0.467617	11.5479
825	NMT1	Glycylpeptide N-tetradecanoyltransferase 1	0.0105578	6.85185	144.743	0.446714	7.12937
826	EXOSC10	Exosome component 10	0.0105577	8.13044	222.02	0.453153	8.55505
827	BRD2	Bromodomain-containing protein 2	0.0104952	5.875	103.264	0.404124	6.07407
828	IGBP1	Immunoglobulin-binding protein 1	0.0104879	4.475	468.377	0.433745	4.8046
829	GNB1	Guanine nucleotide-binding protein G(I)/G(S)/G(T) subunit beta-1	0.0104871	5.03448	412.957	0.468052	5.49191
830	HNF1A	Hepatocyte nuclear factor 1-alpha	0.0104726	8.11429	422.46	0.437011	8.891
831	PRKCSH	Glucosidase 2 subunit beta	0.010459	6.8	203.175	0.461186	7.08929
832	FARSA	Phenylalanine--tRNA ligase alpha subunit	0.0104392	6.05556	329.481	0.460763	6.41176
833	COPG1	Coatomer subunit gamma-1	0.0104382	8.84	217.725	0.437899	9.32143
834	RBCK1	RanBP-type and C3HC4-type zinc finger-containing protein 1	0.0104177	10.5161	246.515	0.469071	11.4728
835	DICER1	Endoribonuclease Dicer	0.0104006	8.53571	444.126	0.436885	9.13323
836	CSDE1	Cold shock domain-containing protein E1	0.0103879	7.25	52.687	0.441486	7.63158
837	MUC1	Mucin-1	0.0103298	8.7037	311.549	0.477381	9.125
838	FXR2	Fragile X mental retardation syndrome-related protein 2	0.0103258	7.35294	430.888	0.443042	8.10826
839	NSFL1C	NSFL1 cofactor p47	0.0102621	6	726.915	0.430897	7.52145
840	NR2C2	Nuclear receptor subfamily 2 group C member 2	0.0102425	11	638.212	0.459501	12.1188
841	STRN	Striatin	0.0102382	7	235.767	0.459641	7.33148
842	NCK1	Cytoplasmic protein NCK1	0.010225	9.94546	1157.13	0.439429	13.5841
843	CDK11B	Cyclin-dependent kinase 11B	0.0102235	7.29167	252.705	0.462175	7.86298
844	SOS1	Son of sevenless homolog 1	0.0101812	15.4444	652.393	0.465741	16.3693
845	PTPN6	Tyrosine-protein phosphatase non-receptor type 6	0.0101429	14.0698	814.964	0.47068	16.1454
846	CAMK2A	Calcium/calmodulin-dependent protein kinase type II subunit alpha	0.0101278	9.09756	972.167	0.436253	11.3229
847	GNAI2	Guanine nucleotide-binding protein G(i) subunit alpha-2	0.0101205	6.51613	518.828	0.460482	7.97246
848	DDX50	ATP-dependent RNA helicase DDX50	0.0100789	6.6875	50.4761	0.442004	7.13333
849	KLF4	Krueppel-like factor 4	0.0100693	7.47826	142.998	0.443302	7.81818
850	PSEN1	Presenilin-1	0.0100479	8.46809	1259.5	0.457134	10.8272
851	PSMB7	Proteasome subunit beta type-7	0.0100375	27.4146	140.687	0.41905	28.2873
852	S100A8	Protein S100-A8	0.010013	7.84211	58.7417	0.46388	8.27778
853	MEF2D	Myocyte-specific enhancer factor 2D	0.0099836	7.9	201.164	0.44884	8.36323
854	TTK	Dual specificity protein kinase TTK	0.00997151	7.95833	247.38	0.465597	8.5079
855	DUT	Deoxyuridine 5'-triphosphate nucleotidohydrolase, mitochondrial, dUTPase	0.00996264	8.44444	395.623	0.451796	9.03098
856	TECR	Very-long-chain enoyl-CoA reductase	0.00995436	6.19048	202.58	0.462033	6.5
857	MVP	Major vault protein	0.00994666	7.36	375.279	0.461327	8.08333
858	STMN1	Stathmin	0.00994602	6.2	196.569	0.434745	6.61765
859	BANP	Protein BANP	0.00992432	8.21875	369.666	0.435498	8.962
860	CALD1	Caldesmon	0.00989594	5.95	135.73	0.446582	6.27719
861	EP400	E1A-binding protein p400	0.00988375	7.83333	123.061	0.454792	8.17391
862	COPRS	Coordinator of PRMT5 and differentiation stimulator	0.0098825	3.08696	50.2535	0.39451	3.22727
863	TRIP4	Activating signal cointegrator 1	0.0098696	13.0312	333.841	0.467183	14.3451
864	YTHDF1	YTH domain-containing family protein 1	0.00978833	5.875	47.6364	0.459921	6.26667
865	POLR1B	DNA-directed RNA polymerase I subunit RPA2, RNA polymerase I subunit 2	0.00977684	7.78125	374.864	0.456996	8.87201
866	MPRIP	Myosin phosphatase Rho-interacting protein	0.00975552	9.70833	98.3389	0.454381	10.1304
867	CASP7	Caspase-7	0.00974717	8.76744	475.815	0.441874	9.34841
868	UFD1L	Ubiquitin recognition factor in ER-associated degradation protein 1	0.00974696	4.9697	622.78	0.442004	5.36599
869	CCNH	Cyclin-H	0.00973264	7.40741	167.091	0.463025	7.82118
870	BCAR1	Breast cancer anti-estrogen resistance protein 1	0.00973163	11.0625	239.19	0.457967	11.6381
871	GEMIN4	Gem-associated protein 4	0.0097116	7.46667	266.062	0.442133	7.83164
872	TDG	G/T mismatch-specific thymine DNA glycosylase	0.0097029	11.9643	105.406	0.461186	12.4174
873	WDR18	WD repeat-containing protein 18	0.00969909	5.95238	270.655	0.444346	6.33182
874	FZR1	Fizzy-related protein homolog	0.00969243	4.74194	391.735	0.436253	5.24545
875	AHR	Aryl hydrocarbon receptor	0.0096634	10.3214	309.981	0.460623	11.9958
876	MPG	DNA-3-methyladenine glycosylase	0.00964645	6.25714	989.717	0.458245	7.42023
877	VASP	Vasodilator-stimulated phosphoprotein	0.00961257	6.70833	297.659	0.441745	7.16957
878	PPP6C	Serine/threonine-protein phosphatase 6 catalytic subunit	0.00960684	5.77273	90.3967	0.446714	6.04762
879	PCM1	Pericentriolar material 1 protein	0.00958411	6.16667	755.465	0.438281	7.41217
880	ELF3	ETS-related transcription factor Elf-3	0.00957835	6.78788	293.772	0.441874	7.11302
881	TRAF3	TNF receptor-associated factor 3	0.00956722	8.51282	672.523	0.465453	9.34923
882	HACD3	Very-long-chain (3R)-3-hydroxyacyl-CoA dehydratase 3	0.00951471	4.30435	351.175	0.454929	4.55325
883	CEP55	Centrosomal protein of 55 kDa	0.00949104	6.5625	571.442	0.444739	7.42657
884	UNC45A	Protein unc-45 homolog A	0.00948579	6.375	224.925	0.461327	6.70924
885	CCNT1	Cyclin-T1	0.00948459	8.48276	437.543	0.457411	10.4722
886	BAD	Bcl2-associated agonist of cell death	0.00944297	9	342.652	0.431883	9.71539
887	FAS	Tumor necrosis factor receptor superfamily member 6	0.00941125	9.76923	790.574	0.443042	10.88
888	AKT2	RAC-beta serine/threonine-protein kinase	0.00939485	9.73077	240.091	0.469071	10.2172
889	TNFRSF14	Tumor necrosis factor receptor superfamily member 14	0.00938882	6.2069	678.905	0.466172	6.69048
890	PIK3R3	Tumor necrosis factor receptor superfamily member 14	0.00936202	10.7368	1001.35	0.468052	12.1042
891	WWP1	NEDD4-like E3 ubiquitin-protein ligase WWP1	0.00934134	7.5	295.869	0.439942	7.82247
892	MED17	Mediator of RNA polymerase II transcription subunit 17	0.00931687	17.0263	296.006	0.460342	19.2806
893	JUND	Transcription factor jun-D	0.00929849	9.81481	398.094	0.462316	10.7483
894	MED14	Mediator of RNA polymerase II transcription subunit 14	0.00929739	15.3023	768.348	0.469508	18.2865
895	FHL1	Four and a half LIM domains protein 1	0.00929488	6.11538	358.509	0.461468	6.4286
896	RAB11A	Ras-related protein Rab-11A	0.00929221	7.03333	350.359	0.442004	7.71784
897	MAP3K2	Mitogen-activated protein kinase kinase kinase 2	0.00925506	10.3333	104.565	0.428815	11.0353
898	ARF1	ADP-ribosylation factor 1	0.00925349	6.90909	234.66	0.422216	7.65368
899	CIITA	MHC class II transactivator	0.00923447	6.03704	240.09	0.447907	6.46643
900	TAF10	Transcription initiation factor TFIID subunit 10	0.00923446	8.22222	215.746	0.454244	9.33407
901	RASSF1	Ras association domain-containing protein 1	0.00923116	7.73077	167.777	0.436758	8.19273
902	PSMB9	Proteasome subunit beta type-9	0.00922696	21.087	855.879	0.44579	24.6107
903	NCAPG	Condensin complex subunit 3	0.00921417	7.85714	183.594	0.461468	8.653
904	CDC34	Ubiquitin-conjugating enzyme E2 R1	0.00919942	7.92	111.311	0.43487	8.25
905	CLNS1A	Methylosome subunit pICln	0.00919282	5.88462	242.604	0.426753	6.33333
906	KMT5B	Histone-lysine N-methyltransferase KMT5B	0.00917651	4	19.5606	0.420569	4.22222
907	PIM1	Serine/threonine-protein kinase pim-1	0.00910997	5.41667	802.463	0.439173	6.31023
908	MARCKS	Myristoylated alanine-rich C-kinase substrate	0.00909226	5.3913	138.069	0.439942	5.65341
909	SLC9A3R1	Na(+)/H(+) exchange regulatory cofactor NHE-RF1	0.00908722	8	156.65	0.438281	8.37799
910	CDC73	Parafibromin	0.00907434	5.35294	802.018	0.447244	5.95377
911	ACTC1	Actin, alpha cardiac muscle 1	0.00907411	5.56522	400.17	0.457134	5.87273
912	DDX54	ATP-dependent RNA helicase DDX54	0.00905853	4.89474	78.5734	0.456719	5.16667
913	PIAS3	E3 SUMO-protein ligase PIAS3	0.00905372	8.60714	259.314	0.458245	8.96387
914	MNAT1	CDK-activating kinase assembly factor MAT1	0.00904702	6.37931	333.797	0.451391	6.82443
915	SMC2	Structural maintenance of chromosomes protein 2	0.00902696	6.72414	515.174	0.460342	8.95314
916	WWP2	NEDD4-like E3 ubiquitin-protein ligase WWP2	0.0090265	7.2963	225.509	0.439173	7.67071
917	ARPC3	Actin-related protein 2/3 complex subunit 3	0.00901171	7.92857	194.621	0.42555	8.48348
918	PPARD	Peroxisome proliferator-activated receptor delta	0.00900854	8.55556	585.497	0.42543	9.47523
919	ADD1	Alpha-adducin	0.0089927	6.74074	230.24	0.445395	7.58761
920	CLTCL1	Clathrin heavy chain 2	0.00897915	5.11765	223.845	0.454929	5.46591
921	DSG1	Desmoglein-1	0.00895848	5.84615	43.1286	0.450313	6.36111
922	NFYA	Nuclear transcription factor Y subunit alpha	0.00892357	9.6087	171.207	0.459081	10.1301
923	BCOR	BCL-6 corepressor	0.00889306	7.38462	184.871	0.450179	7.8746
924	USF1	Upstream stimulatory factor 1	0.00889073	7.92857	171.624	0.455478	8.30664
925	MBP	Myelin basic protein	0.00886952	6	275.733	0.430405	6.26408
926	STAT6	Signal transducer and activator of transcription 6	0.00885168	8.90323	233.766	0.426995	9.35294
927	VAV2	Guanine nucleotide exchange factor VAV2	0.00884439	7.30303	563.624	0.446186	7.98067
928	WDR36	WD repeat-containing protein 36	0.00883865	7.13044	270.134	0.44804	7.49043
929	SOCS3	Suppressor of cytokine signaling 3	0.00880122	5.54839	421.843	0.443172	5.81557
930	TCEB2	Elongin-B	0.00879799	5.86207	638.897	0.418121	8.13573
931	BIRC3	Baculoviral IAP repeat-containing protein 3	0.00879594	12.3333	351.856	0.436885	13.6166
932	MCL1	Induced myeloid leukemia cell differentiation protein Mcl-1	0.00879055	7.57143	296.727	0.432874	8.66122
933	DNM1	Dynamin-1	0.00878333	7.57895	865.332	0.444346	9.02006
934	TSC1	Hamartin	0.00873915	7.14286	382.689	0.458523	7.51178
935	ZBTB17	Zinc finger and BTB domain-containing protein 17	0.00873464	8.68421	183.52	0.454792	9.3
936	SP3	ranscription factor Sp3	0.0086559	9.86364	163.075	0.450313	10.3333
937	FMR1	Synaptic functional regulator FMR1	0.00865152	6.90476	102.069	0.457411	7.25
938	KDR	Vascular endothelial growth factor receptor 2	0.00864967	10.6667	257.118	0.434495	11.2399
939	GLYR1	Putative oxidoreductase GLYR1	0.00862061	6.19048	125.057	0.43487	6.5
940	MAP4K4	Mitogen-activated protein kinase kinase kinase kinase 4	0.00859883	4.63636	244.604	0.448974	4.85714
941	IGHG1	Immunoglobulin heavy constant gamma 1	0.00859174	4.7	2614.11	0.428937	7.85109
942	UBE4B	Ubiquitin conjugation factor E4 B	0.00858784	7.69231	332.86	0.463025	8.20768
943	SKIL	Ski-like protein	0.00858648	9.10811	948.158	0.453562	10.7446
944	TADA3	Transcriptional adapter 3	0.00856498	7.28571	494.216	0.456581	7.80591
945	OGT	UDP-N-acetylglucosamine--peptide N-acetylglucosaminyltransferase 110 kDa subunit	0.00852663	6.14815	271.811	0.440198	6.65116
946	RNF40	E3 ubiquitin-protein ligase BRE1B	0.00851181	6.9	321.92	0.46388	7.42626
947	RCHY1	RING finger and CHY zinc finger domain-containing protein 1	0.00850948	7.45833	158.239	0.435875	7.79503
948	GAK	Cyclin-G-associated kinase	0.00850356	6.28	135.529	0.446186	6.61905
949	RNF4	E3 ubiquitin-protein ligase RNF4	0.00847114	8.36667	264.174	0.455891	9.41398
950	FOXK2	Forkhead box protein K2	0.00845871	6.74194	515.746	0.449911	7.62936
951	ABL2	Tyrosine-protein kinase ABL2	0.00844417	12.5862	146.878	0.447111	13.1595
952	KRT19	Keratin, type I cytoskeletal 19	0.00838918	6	53.0156	0.451256	6.375
953	RNF31	E3 ubiquitin-protein ligase RNF31	0.00838686	8.32143	367.2	0.467472	8.87029
954	MED21	Mediator of RNA polymerase II transcription subunit 21	0.00838095	16.4878	498.442	0.452609	18.5208
955	SRF	Serum response factor	0.00835923	10.5897	467.319	0.418469	11.578
956	LGALS7	Galectin-7	0.00824865	7.53333	47.5532	0.445133	8.28571
957	LGALS7B	Galectin-7	0.00824865	7.53333	47.5532	0.445133	8.28571
958	GTF2H1	General transcription factor IIH subunit 1	0.0082089	7.47826	226.864	0.459921	7.86061
959	ALB	Serum albumin	0.00815441	5.38776	4235.26	0.437391	10.6644
960	NR1H4	Bile acid receptor	0.00815293	7.41667	131.504	0.453835	7.76328
961	E2F4	Transcription factor E2F4	0.00811135	7.07407	172.345	0.429425	7.44796
962	NFYB	Nuclear transcription factor Y subunit beta	0.00810908	6.95455	99.025	0.428815	7.28571
963	FKBPL	FK506-binding protein-like	0.00808508	5.42857	353.163	0.46175	5.95
964	MTCH2	Mitochondrial carrier homolog 2	0.00806379	6.26667	280.649	0.451661	6.77143
965	HEXIM1	Protein HEXIM1	0.00806149	5.4	219.067	0.456029	5.92105
966	JUNB	Transcription factor jun-B	0.00805754	10.2963	553.111	0.453017	12.3889
967	SIN3B	Paired amphipathic helix protein Sin3b	0.00804527	9.30435	287.903	0.449375	9.75455
968	ITGB4	Integrin beta-4	0.00800718	6.20833	79.2018	0.43462	6.47826
969	MED24	Mediator of RNA polymerase II transcription subunit 24	0.00795712	17.2105	491.302	0.466316	19.4259
970	NUP85	Nuclear pore complex protein Nup85	0.00794641	5.82353	41.2429	0.440713	6.1875
971	DAB2IP	Disabled homolog 2-interacting protein	0.00794408	6.64706	36.6412	0.444477	7.0625
972	SHMT1	Serine hydroxymethyltransferase	0.0079396	3.20833	102.013	0.370944	3.55942
973	PASK	PAS domain-containing serine/threonine-protein kinase	0.00793839	5.76	362.455	0.427479	6.91627
974	SNRPN	Small nuclear ribonucleoprotein-associated protein N	0.00793634	4.58824	181.738	0.454792	4.875
975	TBL2	Transducin beta-like protein 2	0.00791169	3.61538	102.718	0.44645	3.91667
976	SCYL2	SCY1-like protein 2	0.0078901	4.76923	49.2319	0.447509	5.16667
977	MYCBP2	E3 ubiquitin-protein ligase MYCBP2	0.00788311	7.19048	101.301	0.424115	7.85556
978	PDE4D	cAMP-specific 3',5'-cyclic phosphodiesterase 4D	0.00787631	6.79167	282.275	0.438918	7.33333
979	DAPK3	Death-associated protein kinase 3	0.00785708	8.19048	160.881	0.427237	8.72273
980	BTF3	Transcription factor BTF3	0.00784814	4.6	97.1528	0.454929	4.84211
981	DNAJC13	DnaJ homolog subfamily C member 13	0.00782429	4.64286	37.706	0.435624	5
982	NR2C1	Nuclear receptor subfamily 2 group C member 1	0.00781894	11.5217	34.8664	0.439173	12.0541
983	DHX36	ATP-dependent RNA helicase DHX36	0.00781383	4.4375	48.9356	0.428207	4.73333
984	ITK	Tyrosine-protein kinase ITK/TSK	0.00781262	10.5769	183.468	0.422926	11.31
985	CEP128	Centrosomal protein of 128 kDa	0.00778789	5	600.172	0.432254	6.36896
986	LIMK1	LIM domain kinase 1	0.00777635	7.14815	301.771	0.428085	7.61144
987	CCDC88A	Girdin	0.00774827	5.78571	463.855	0.44884	6.26927
988	FOXO4	Forkhead box protein O4	0.00774699	8.4	70.1764	0.454655	8.84211
989	GFAP	Glial fibrillary acidic protein	0.00771251	6.96875	438.418	0.439685	7.44148
990	POLR2G	DNA-directed RNA polymerase II subunit RPB7	0.00769192	13.7273	297.163	0.455754	16.416
991	DCC	Netrin receptor DCC	0.00768203	4.79167	187.802	0.406629	5.00395
992	CAMK2D	Calcium/calmodulin-dependent protein kinase type II subunit delta	0.00766683	7.2	251.269	0.4194	7.77989
993	DYRK1B	Dual specificity tyrosine-phosphorylation-regulated kinase 1B	0.00765325	6.2963	461.634	0.422452	6.8549
994	PLCG2	1-phosphatidylinositol 4,5-bisphosphate phosphodiesterase gamma-2	0.00765249	12.1034	231.657	0.437391	12.8964
995	ZBTB7A	Zinc finger and BTB domain-containing protein 7A	0.00764462	10.7727	43.0151	0.420217	11.2857
996	SOCS1	Suppressor of cytokine signaling 1	0.00761812	9.27586	253.444	0.429181	9.76985
997	PTPRC	Receptor-type tyrosine-protein phosphatase C	0.00759841	9.62069	378.655	0.42845	10.6709
998	USO1	General vesicular transport factor p115	0.00759026	5.75862	618.024	0.447907	6.3313
999	GADD45G	Growth arrest and DNA damage-inducible protein GADD45 gamma	0.0075765	5.46154	383.385	0.460482	6.44725
1000	GSK3A	Glycogen synthase kinase-3 alpha	0.00755628	7.16667	532.905	0.430774	8.02339
1001	MED6	Mediator of RNA polymerase II transcription subunit 6	0.0075388	16.1765	162.799	0.443693	17.604
1002	MTA3	Metastasis-associated protein MTA3	0.00751026	8.20833	129.507	0.450313	8.69778
1003	FBXO18	F-box DNA helicase 1	0.00748744	6	15.9121	0.448974	6.5
1004	LRP1	Prolow-density lipoprotein receptor-related protein 1	0.00748607	7.52	506.283	0.440584	8.09669
1005	DECR1	2,4-dienoyl-CoA reductase, mitochondrial	0.00747965	5.81818	17.5056	0.44844	6.4
1006	ASXL1	Putative Polycomb group protein ASXL1	0.00747111	5.27778	112.129	0.46488	5.58824
1007	GRIP1	Glutamate receptor-interacting protein 1	0.00743328	10.1739	274.172	0.454929	10.6788
1008	SYVN1	E3 ubiquitin-protein ligase synoviolin	0.00743288	9.10714	277.146	0.428693	9.87037
1009	PACSIN3	Protein kinase C and casein kinase substrate in neurons protein 3	0.0074315	5.16667	164.408	0.414333	5.44671
1010	DNM1L	Dynamin-1-like protein	0.00741303	6.125	315.233	0.462316	6.66667
1011	ZAP70	Tyrosine-protein kinase ZAP-70	0.0073882	13.3	313.066	0.423163	15.3045
1012	SARS2	Serine--tRNA ligase, mitochondrial	0.00737812	5.36364	16.9881	0.449508	5.9
1013	NCAPH	Condensin-2 complex subunit H2	0.00737339	7.29412	106.127	0.456167	7.75833
1014	FES	Tyrosine-protein kinase Fes/Fps	0.00735968	7.5	209.367	0.433372	7.83789
1015	NR1I2	Nuclear receptor subfamily 1 group I member 2	0.00735821	8.44828	254.752	0.423163	9.05714
1016	NR1H3	Oxysterols receptor LXR-alpha	0.00730277	5.59375	352.915	0.427237	6.02123
1017	PRKACB	cAMP-dependent protein kinase catalytic subunit beta	0.00729333	5	807.252	0.43387	6.19596
1018	GRB7	Growth factor receptor-bound protein 7	0.00725716	5.38095	91.5939	0.426753	5.65
1019	UBE3C	Ubiquitin-protein ligase E3C	0.00725251	7.15789	253.908	0.463594	7.57778
1020	AES	Amino-terminal enhancer of split, Amino enhancer of split	0.00722061	6.55882	457.393	0.427964	7.23739
1021	MEF2C	Myocyte-specific enhancer factor 2C	0.00718256	7.45455	156.339	0.420334	7.96667
1022	E2F6	Transcription factor E2F6	0.00714154	5.27778	89.2373	0.450045	5.58824
1023	PLG	Plasminogen	0.00711954	5	4079.38	0.417658	6.04945
1024	ARNT	Aryl hydrocarbon receptor nuclear translocator	0.00711948	9.5	208.788	0.444215	11.381
1025	CRYAB	Alpha-crystallin B chain	0.00711428	7.1875	783.676	0.437518	8.22164
1026	ARG1	Arginase-1	0.00711089	3.18182	108.278	0.440584	3.5
1027	SARNP	SAP domain-containing ribonucleoprotein	0.00709871	3.8125	122.914	0.448573	4.08333
1028	POLR2H	DNA-directed RNA polymerases I, II, and III subunit RPABC3, RNA polymerases I, II, and III subunit ABC3	0.00709205	13.069	220.189	0.448707	15.1254
1029	AKAP9	A-kinase anchor protein 9	0.00701405	4.39286	460.015	0.4194	4.98517
1030	SPOP	Speckle-type POZ protein	0.00701018	6.94737	108.877	0.452067	7.33333
1031	KRAS	GTPase KRas	0.00700364	3.06452	810.604	0.428207	3.83313
1032	KDM5A	Lysine-specific demethylase 5A	0.00699007	6.52381	78.015	0.436379	6.85
1033	NR1H2	Oxysterols receptor LXR-beta	0.00698845	7.91667	489.418	0.412182	8.7321
1034	A2M	Alpha-2-macroglobulin	0.00696495	7.16667	1449.75	0.428693	11.187
1035	MTDH	Protein LYRIC	0.00695863	3.83333	86.5192	0.450986	4.18182
1036	PDPK1	3-phosphoinositide-dependent protein kinase 1	0.00695816	6	230.111	0.429425	6.28784
1037	SMYD2	N-lysine methyltransferase SMYD2	0.00694157	2.72222	161.631	0.452881	2.88235
1038	FKBP14	Peptidyl-prolyl cis-trans isomerase FKBP14	0.00693907	0.125	17.9745	0.361091	0.133333
1039	HBA1	Hemoglobin subunit alpha	0.00693829	6.08696	756.108	0.41789	7.5303
1040	HBA2	Hemoglobin subunit alpha	0.00693829	6.08696	756.108	0.41789	7.5303
1041	GBAS	Protein NipSnap homolog 2	0.00692189	3.66667	416.299	0.428693	4.06471
1042	MED16	Mediator of RNA polymerase II transcription subunit 16	0.00687544	16	364.853	0.450717	17.3353
1043	CAT	Catalase	0.00686564	6.375	123.631	0.456167	6.86667
1044	ATP2B1	Plasma membrane calcium-transporting ATPase 1	0.00685503	4.3125	50.9128	0.431143	4.6
1045	PRMT2	Protein arginine N-methyltransferase 2	0.00682645	6.59091	199.068	0.444346	7.01648
1046	TCF20	Transcription factor 20	0.00681718	8.3	71.0131	0.447111	8.73684
1047	CHD8	Chromodomain-helicase-DNA-binding protein 8	0.00681059	5.45455	145.373	0.429425	5.71905
1048	NCOA5	Nuclear receptor coactivator 5	0.00680993	5.92308	20.04	0.433995	6.41667
1049	NCAPD3	Condensin-2 complex subunit D3	0.00680349	5.42105	273.464	0.447642	6.40278
1050	BAP1	Ubiquitin carboxyl-terminal hydrolase BAP1	0.00678703	4.04762	194.079	0.444608	4.37815
1051	S100A7	Protein S100-A7	0.00677783	5.8125	407.131	0.450986	6.42857
1052	HECTD1	E3 ubiquitin-protein ligase HECTD1	0.00673631	6.8	269.421	0.449107	7.46147
1053	MBD2	Methyl-CpG-binding domain protein 2	0.00671175	10.7143	45.152	0.436758	11.25
1054	PBXIP1	Pre-B-cell leukemia transcription factor-interacting protein	0.0067037	4	96.3609	0.456305	4.34965
1055	MED20	Mediator of RNA polymerase II transcription subunit 20	0.00668686	10.8889	499.589	0.447907	12.093
1056	ESRRA	Steroid hormone receptor ERR1	0.00665638	6.28571	338.954	0.44487	6.87224
1057	CAMKK2	Calcium/calmodulin-dependent protein kinase kinase 2	0.00665594	4.52941	60.7165	0.421508	4.8125
1058	TRIM55	Tripartite motif-containing protein 55	0.00663594	6.7	224.521	0.403908	7.29914
1059	CSRP1	Cysteine and glycine-rich protein 1	0.00662432	6.06667	182.333	0.455204	6.52381
1060	POLR2D	DNA-directed RNA polymerase II subunit RPB4, RNA polymerase II subunit B4	0.00659652	11.2759	375.621	0.447376	13.0727
1061	SH3GL1	Endophilin-A2	0.0065896	7.6875	743.348	0.423757	9.45155
1062	BUB1B-PAK6	BUB1B-PAK6 readthrough	0.00656924	5	15.6752	0.454244	5.5
1063	PAK6	Serine/threonine-protein kinase PAK 6	0.00656924	5	15.6752	0.454244	5.5
1064	SYN1	Synapsin-1	0.00654868	7.08333	205.77	0.423282	7.76377
1065	VAPB	Vesicle-associated membrane protein-associated protein B/C	0.00652098	6.11538	693.435	0.43412	7.3047
1066	NCAPD2	Condensin complex subunit 1	0.00651095	6.47368	130.608	0.446846	6.91806
1067	CNOT1	CCR4-NOT transcription complex subunit 1	0.00646387	3.04545	368.066	0.443693	3.22857
1068	GNAI3	Guanine nucleotide-binding protein G(k) subunit alpha	0.00644635	7.13636	487.566	0.452474	8.43224
1069	RABGEF1	Rab5 GDP/GTP exchange factor	0.00643055	5.83333	57.8326	0.456443	6.36364
1070	RANBP3	Ran-binding protein 3	0.00641954	4.23529	100.414	0.430282	4.5
1071	GADD45GIP1	Growth arrest and DNA damage-inducible proteins-interacting protein 1	0.00641618	3.22222	153.518	0.427964	3.54412
1072	DDX19B	ATP-dependent RNA helicase DDX19B	0.00637555	2.65385	723.666	0.430405	3.11976
1073	AKAP13	A-kinase anchor protein 13	0.00637147	4.73684	419.711	0.454244	5.01389
1074	BLK	Tyrosine-protein kinase Blk	0.00636707	4.45	125.646	0.412521	4.68421
1075	MED7	Mediator of RNA polymerase II transcription subunit 7	0.00636071	14.1515	327.237	0.441099	15.4516
1076	ZNF512B	Zinc finger protein 512B	0.00635526	4.29167	232.943	0.443042	4.50568
1077	BCL2L11	Bcl-2-like protein 11	0.00635468	7.09091	143.354	0.424831	7.42857
1078	DLG1	Disks large homolog 1	0.00629953	7.47826	345.106	0.422571	8.54669
1079	GLMN	Glomulin	0.00629252	5.28571	24.2585	0.404341	5.69231
1080	SYT1	Synaptotagmin-1	0.00627803	5.83333	69.9553	0.428937	6.17647
1081	SOS2	on of sevenless homolog 2	0.00627733	8.33333	145.973	0.451796	8.92857
1082	EDF1	Endothelial differentiation-related factor 1	0.00626194	5.73684	180.005	0.450045	6.13492
1083	PPP3CA	Serine/threonine-protein phosphatase 2B catalytic subunit alpha isoform	0.00624761	5.41667	252.974	0.424234	5.73814
1084	MKNK2	MAP kinase-interacting serine/threonine-protein kinase 2	0.00624592	4.89474	182.29	0.442133	5.20278
1085	POLR2I	DNA-directed RNA polymerase II subunit RPB9, RNA polymerase II subunit B9	0.00623801	12.8421	58.0867	0.445264	13.5948
1086	ACTN2	Alpha-actinin-2	0.00623076	7.03448	369.907	0.413198	7.74392
1087	NCK2	Cytoplasmic protein NCK2	0.0061523	6.63333	428.284	0.415017	7.45452
1088	IRF2	Interferon regulatory factor 2	0.00612618	4.6875	85.5015	0.420451	5.13333
1089	DLG4	Disks large homolog 4	0.00612038	6.11538	677.049	0.435749	7.50129
1090	SIAH2	E3 ubiquitin-protein ligase SIAH2	0.00611105	6.17391	133.071	0.422808	6.55844
1091	ZHX1	Zinc fingers and homeoboxes protein 1	0.00608218	7.42857	185.959	0.43016	7.95
1092	SEC61B	Protein transport protein Sec61 subunit beta	0.00606843	5.35294	147.213	0.445922	5.85655
1093	PRKAA2	5'-AMP-activated protein kinase catalytic subunit alpha-2	0.00605506	4.2	307.31	0.422689	4.54044
1094	EXOSC1	Exosome complex component CSL4	0.00602834	4.85714	209.018	0.399523	5.31871
1095	TXNRD1	Thioredoxin reductase 1, cytoplasmic	0.00600427	3.63636	59.026	0.451256	4
1096	CCNC	Cyclin-C	0.00599793	12.0714	205.044	0.443693	12.8309
1097	KIF1A	Kinesin-like protein KIF1A	0.00598682	6	142.318	0.461045	6.44805
1098	CD40	Tumor necrosis factor receptor superfamily member 5	0.00596201	7.15385	215.142	0.404883	7.86667
1099	MYCN	N-myc proto-oncogene protein	0.0059448	4.8125	40.4837	0.418934	5.13333
1100	TTC5	Tetratricopeptide repeat protein 5	0.00594324	3.55556	52.0908	0.447244	4
1101	APPBP2	Amyloid protein-binding protein 2	0.00587362	6.11111	136.4	0.423045	6.47059
1102	FHOD1	FH1/FH2 domain-containing protein 1	0.00587226	5.71429	49.4435	0.429792	6.15385
1103	RGS3	Regulator of G-protein signaling 3	0.00586224	5.5	229.329	0.444608	5.92308
1104	SMARCD3	SWI/SNF-related matrix-associated actin-dependent regulator of chromatin subfamily D member 3	0.00581788	6.6	270.479	0.443824	6.99058
1105	NCOA4	Nuclear receptor coactivator 4	0.00581628	3.875	160.626	0.456029	4.3
1106	HBP1	Glycosylphosphatidylinositol-anchored high density lipoprotein-binding protein 1	0.00579821	4.06667	324.713	0.447244	4.41071
1107	NELFCD	Negative elongation factor C/D	0.00578381	2.63158	302.649	0.42543	3.03333
1108	NDC80	Kinetochore protein NDC80 homolog	0.00576921	6.4	51.8849	0.44579	6.85714
1109	SNX6	Sorting nexin-6	0.00574991	5.84211	274.9	0.446582	6.22222
1110	CASP1	Caspase-1	0.00573886	6	133.909	0.429547	6.27273
1111	RGS2	Regulator of G-protein signaling 2	0.00572492	3.18182	492.037	0.407728	3.91037
1112	UBR1	E3 ubiquitin-protein ligase UBR1	0.00572022	4.41667	33.2307	0.429425	4.81818
1113	PAGR1	PAXIP1-associated glutamate-rich protein 1	0.00566724	7.18182	13.2957	0.452609	7.9
1114	NR1I3	Nuclear receptor subfamily 1 group I member 3	0.00566377	6.85714	260.032	0.403368	7.56506
1115	PQBP1	Polyglutamine-binding protein 1	0.0056376	3.15385	65.6156	0.446318	3.41667
1116	TGFB1I1	Transforming growth factor beta-1-induced transcript 1 protein	0.00561079	4.3125	80.0381	0.422926	4.60476
1117	PPP1R9B	Neurabin-2	0.00555828	4.29412	217.82	0.417197	4.5625
1118	SERPINB4	Serpin B4	0.00552114	2.66667	26.716	0.442392	3
1119	RPL36AL	60S ribosomal protein L36a-like	0.00549883	4.6	29.1697	0.428815	5.11111
1120	CUEDC2	CUE domain-containing protein 2	0.00548754	3.38462	42.5568	0.444085	3.66667
1121	MAP2K5	Dual specificity mitogen-activated protein kinase kinase 5	0.0054736	6.11765	409.74	0.407728	8.4375
1122	GRIN1	Glutamate receptor ionotropic	0.0054706	5.84	319.377	0.401437	6.32035
1123	RAC2	Ras-related C3 botulinum toxin substrate 2	0.00546481	4.41667	24.4205	0.40069	4.81818
1124	LMO4	LIM domain transcription factor LMO4	0.00545681	3.94737	310.851	0.448307	4.25758
1125	MYH14	Myosin-14	0.00544973	3.66667	142.225	0.437391	3.92857
1126	SH3GLB1	Endophilin-B1	0.00540522	6.08	245.134	0.426874	6.7303
1127	EPB41L5	Band 4.1-like protein 5	0.00540387	2.6	45.2946	0.450448	2.88889
1128	ITPR1	Inositol 1,4,5-trisphosphate receptor type 1	0.00539999	4.11111	328.957	0.409832	4.37132
1129	ZFYVE9	Zinc finger FYVE domain-containing protein 9	0.00539745	3.94737	145.061	0.413765	4.19444
1130	HNRNPA1L2	Heterogeneous nuclear ribonucleoprotein A1-like 2	0.00537014	6.22222	3.23049	0.429181	7
1131	XBP1	X-box-binding protein 1	0.00535893	4.26667	92.7428	0.437772	4.57143
1132	MAGEA11	Melanoma-associated antigen 11	0.00534738	5.125	337.234	0.415588	5.84035
1133	NIN	Ninein, hNinein	0.00534376	6.2963	322.935	0.42092	6.7508
1134	NCAPH2	Condensin-2 complex subunit H2	0.00533208	7.26667	200.377	0.44844	8.39286
1135	PRDM2	PR domain zinc finger protein 2	0.00532924	7.1	4.80329	0.439301	7.88889
1136	KMT2D	Histone-lysine N-methyltransferase 2D	0.00532506	5.75	98.0397	0.436127	6.07121
1137	THOP1	Thimet oligopeptidase	0.00529223	4.2	117.393	0.42567	4.52857
1138	TRIM63	E3 ubiquitin-protein ligase TRIM63	0.00528517	6.48148	264.083	0.411733	6.99921
1139	FAM175B	BRISC complex subunit Abraxas 2	0.00528119	3.66667	44.3741	0.422334	4
1140	MYLK2	Myosin light chain kinase 2	0.0052682	4.63636	44.9781	0.435498	5.1
1141	SHOC2	Leucine-rich repeat protein SHOC-2	0.00525314	4.36364	98.433	0.450179	4.8
1142	MYL6B	Myosin light chain 6B	0.00524587	3.625	4.26288	0.43437	4.14286
1143	BCAS3	Breast carcinoma-amplified sequence 3	0.00522803	3.75	94.9285	0.442392	4
1144	POLR2K	DNA-directed RNA polymerases I, II, and III subunit RPABC4, RNA polymerases I, II, and III subunit ABC4	0.00522672	13.9474	71.8396	0.449107	15
1145	RLIM	E3 ubiquitin-protein ligase RLIM	0.00519356	4.5	224.896	0.441486	5.10606
1146	MED25	Mediator of RNA polymerase II transcription subunit 25	0.00519319	14.1429	115.995	0.433995	14.8048
1147	UXT	Protein UXT	0.00519274	5.7	153.688	0.419283	6.11483
1148	TMOD1	Tropomodulin-1	0.00518978	5.57895	182.823	0.416506	5.9
1149	CNTRL	Centriolin	0.00518969	3.33333	266.406	0.400159	3.6213
1150	PRNP	Major prion protein	0.00517999	5.75	183.324	0.417312	6.05263
1151	NCAPG2	Condensin-2 complex subunit G2	0.00513206	5.33333	9.49345	0.446318	6
1152	MACROD1	O-acetyl-ADP-ribose deacetylase MACROD1	0.00512762	4.2	6.27319	0.428693	4.66667
1153	VAV3	Guanine nucleotide exchange factor VAV3	0.00512703	7.33333	94.3898	0.446714	7.85714
1154	MED10	Mediator of RNA polymerase II transcription subunit 10	0.00512473	16.8889	223.909	0.426392	20.4809
1155	ESRRG	Estrogen-related receptor gamma	0.00510202	4.66667	317.893	0.409943	5.29268
1156	CACNA1C	Voltage-dependent L-type calcium channel subunit alpha-1C	0.00504501	3.5	62.6401	0.404666	3.81818
1157	FASLG	Tumor necrosis factor ligand superfamily member 6	0.00504391	6.06897	410.003	0.40283	6.44442
1158	SPSB1	SPRY domain-containing SOCS box protein 1	0.00502697	3.76923	59.6668	0.408832	4.08333
1159	ELMSAN1	ELM2 and SANT domain-containing protein 1	0.0050216	2.83333	48.4242	0.43462	3.11111
1160	CEP290	Centrosomal protein of 290 kDa	0.00501146	4.05263	242.51	0.436632	4.34306
1161	ALDH2	Aldehyde dehydrogenase, mitochondrial	0.00496389	4.35714	343.627	0.423163	5.20513
1162	AGFG1	Arf-GAP domain and FG repeat-containing protein 1	0.00495518	4.08333	230.685	0.440841	4.55844
1163	PTPRK	Receptor-type tyrosine-protein phosphatase kappa	0.00493941	5.625	376.459	0.410054	6.75638
1164	APLP2	Amyloid-like protein 2	0.00492822	4.89474	146.664	0.411845	5.23611
1165	ISL1	Insulin gene enhancer protein ISL-1	0.00491226	4.46154	93.968	0.445264	4.85606
1166	GRAP2	GRB2-related adapter protein 2	0.00488695	4.42105	228.041	0.409498	4.85873
1167	NR0B1	Nuclear receptor subfamily 0 group B member 1	0.00487504	4.11765	141.322	0.440713	4.375
1168	PDIA2	Protein disulfide-isomerase A2	0.00487314	5.25	132.439	0.415131	5.68889
1169	CDX2	Homeobox protein CDX-2	0.00486422	6.35714	20.512	0.404558	6.84615
1170	EPB41L2	Band 4.1-like protein 2	0.00483452	5.76923	21.5166	0.404992	6.25
1171	SERPINB5	Serpin B5	0.00483179	2.52941	240.744	0.439173	2.70192
1172	SMYD3	Histone-lysine N-methyltransferase SMYD3	0.00482785	3.55556	35.2559	0.439301	4
1173	CBLL1	E3 ubiquitin-protein ligase Hakai	0.00480095	2.75	10.4935	0.436001	3.14286
1174	TRIM54	Tripartite motif-containing protein 54	0.00479064	5.57143	154.595	0.400159	5.94234
1175	ITGB3BP	Centromere protein R	0.00477407	4.73333	162.353	0.442004	5.08791
1176	TAB3	TGF-beta-activated kinase 1 and MAP3K7-binding protein 3	0.00475501	7.83333	16.825	0.435875	8.54546
1177	KANK2	KN motif and ankyrin repeat domain-containing protein 2	0.00473647	4.73684	158.85	0.427116	5
1178	ABCB1	Multidrug resistance protein 1	0.00473274	2.6	19.6363	0.412859	2.88889
1179	CASK	Peripheral plasma membrane protein CASK	0.00471221	4.375	85.6919	0.418701	4.66667
1180	CA2	Carbonic anhydrase 2	0.0047086	4.54545	113.812	0.396063	5
1181	REXO4	RNA exonuclease 4	0.00469971	2.85714	5.33214	0.427358	3.33333
1182	CBLC	E3 ubiquitin-protein ligase CBL-C	0.00469906	5.75	89.1233	0.411957	6.13333
1183	HIPK3	Homeodomain-interacting protein kinase 3	0.00469334	4.4	83.5847	0.412633	4.71978
1184	PSEN2	Presenilin-2	0.00469235	7.22222	307.808	0.413425	8.38955
1185	MED13	Mediator of RNA polymerase II transcription subunit 13	0.00467798	15.6667	95.8091	0.42519	16.496
1186	MED9	Mediator of RNA polymerase II transcription subunit 9	0.00465618	15.963	140.001	0.436127	17.1455
1187	PNRC2	Proline-rich nuclear receptor coactivator 2	0.00464472	3.125	257.205	0.442004	3.33333
1188	NR2F6	Nuclear receptor subfamily 2 group F member 6	0.0046351	5.25	121.226	0.426392	5.6
1189	SLC9A1	Sodium/hydrogen exchanger 1	0.00461047	3.38462	62.0682	0.396063	3.66667
1190	LAMB1	Laminin subunit beta-1	0.00460081	3.07692	109.634	0.413878	3.38889
1191	DERL1	Derlin-1	0.00460016	5.9375	163.6	0.416851	6.62468
1192	BRD8	Bromodomain-containing protein 8	0.00458849	2.8125	77.6235	0.407728	3
1193	CITED1	Cbp/p300-interacting transactivator 1	0.00458692	6.375	1.92917	0.435875	7.28571
1194	EIF4G3	Eukaryotic translation initiation factor 4 gamma 3	0.00457343	4.55556	18.8852	0.436379	5.125
1195	NR2F1	COUP transcription factor 1	0.0045538	6.55556	100.031	0.4276	6.99804
1196	MAST1	Microtubule-associated serine/threonine-protein kinase 1	0.00454718	6.4	278.377	0.412972	7.47389
1197	DDX3Y	ATP-dependent RNA helicase DDX3Y	0.00451203	1.83333	3.00108	0.43176	2.2
1198	SCN5A	Sodium channel protein type 5 subunit alpha	0.00448626	5.25	558.02	0.397628	6.4405
1199	NR4A2	Nuclear receptor subfamily 4 group A member 2	0.00446487	4.6875	52.8739	0.403908	5
1200	XPNPEP1	Xaa-Pro aminopeptidase 1	0.00445281	3.64286	95.6655	0.415588	3.92308
1201	LCOR	Ligand-dependent corepressor	0.00443771	3	29.4342	0.435247	3.3
1202	ATF1	Cyclic AMP-dependent transcription factor ATF-1	0.00441532	7.53333	65.6878	0.439942	8.09341
1203	GNAI1	Guanine nucleotide-binding protein G(i) subunit alpha-1	0.00439538	5.7619	316.979	0.432874	6.89405
1204	QPCTL	Glutaminyl-peptide cyclotransferase-like protein	0.00439374	2.88889	19.6188	0.422571	3.25
1205	POLR2J	DNA-directed RNA polymerase II subunit RPB11-a	0.00439067	11.3158	98.0235	0.435624	11.9444
1206	IFNAR1	Interferon alpha/beta receptor 1	0.00438825	5.22222	77.3271	0.402937	5.52941
1207	FCGR2B	Low affinity immunoglobulin gamma Fc region receptor II-b, IgG Fc receptor II-b	0.00437366	6.72222	79.6542	0.393686	7.11765
1208	RNF14	E3 ubiquitin-protein ligase RNF14	0.0043187	5.36364	32.014	0.43437	5.9
1209	TCTN2	Tectonic-2	0.00431561	3.90909	165.641	0.386032	4.1
1210	POU2F2	POU domain, class 2, transcription factor 2	0.00430203	5.78571	67.2292	0.431143	6.27692
1211	LOC100996724		0.00430047	2.77778	635.219	0.410166	3.0495
1212	GNA13	Guanine nucleotide-binding protein subunit alpha-13	0.00428862	1.76923	171.01	0.418237	1.91667
1213	USP20	Ubiquitin carboxyl-terminal hydrolase 20	0.00428718	6.05556	103.872	0.395233	6.41176
1214	ZSWIM8	Zinc finger SWIM domain-containing protein 8	0.00428222	2	20.4922	0.414105	2.33333
1215	EPHA3	Ephrin type-A receptor 3	0.00428189	5.14286	258.804	0.399841	6.38462
1216	FH	Fumarate hydratase	0.00427725	2.75	89.053	0.400159	2.94359
1217	NR2E3	Photoreceptor-specific nuclear receptor	0.0042452	6.66667	74.5211	0.388617	7.05882
1218	TF		0.00423827	3.8	1070.32	0.440327	4.53956
1219	PSMC3IP	Homologous-pairing protein 2 homolog	0.00423752	4.28571	70.9528	0.440327	4.61538
1220	TEAD2	Transcriptional enhancer factor TEF-4	0.0042082	2.375	94.053	0.397628	2.55385
1221	POLR2F	DNA-directed RNA polymerases I, II, and III subunit RPABC2	0.00420031	12.1053	67.629	0.436758	12.7778
1222	GNB4	Guanine nucleotide-binding protein subunit beta-4	0.0041727	3.81818	88.9294	0.435498	4.2
1223	MICAL1	[F-actin]-monooxygenase MICAL1	0.00417114	5.4	16.4702	0.41789	6
1224	RXRB	Retinoic acid receptor RXR-beta	0.00416318	6.86207	424.455	0.394819	7.7141
1225	AKAP5	A-kinase anchor protein 5	0.00415827	2.38889	200.514	0.386527	2.54828
1226	NBR1	Next to BRCA1 gene 1 protein	0.00409746	6.14286	53.8145	0.398258	6.61538
1227	PATZ1	POZ-, AT hook-, and zinc finger-containing protein 1	0.00408811	5.3	22.5573	0.43102	5.88889
1228	PDLIM1	PDZ and LIM domain protein 1	0.00408596	5.15385	96.4766	0.430405	5.58333
1229	ASCC1	Activating signal cointegrator 1 complex subunit 1	0.00406256	3.88889	50.385	0.435121	4.375
1230	PPP2R3A	Serine/threonine-protein phosphatase 2A regulatory subunit B'' subunit alpha	0.00405697	5.21429	164.192	0.435247	5.63846
1231	ANGPTL4	Angiopoietin-related protein 4	0.00404623	3.75	8.95569	0.435121	4.28571
1232	RBM23	Probable RNA-binding protein 23	0.00404445	4.09091	42.8814	0.427358	4.5
1233	NOSIP	Nitric oxide synthase-interacting protein	0.00402378	2.18182	63.5266	0.397314	2.4
1234	BLNK	B-cell linker protein	0.00402124	7.38095	96.1073	0.393276	7.85794
1235	KCNQ1	Potassium voltage-gated channel subfamily KQT member 1	0.00399832	4.25	25.4018	0.396896	4.63636
1236	IL6ST	Interleukin-6 receptor subunit beta, IL-6 receptor subunit beta, IL-6R subunit beta, IL-6R-beta, IL-6RB	0.00399805	8.1	141.678	0.400797	8.55108
1237	DLG3	Disks large homolog 3	0.00397528	3	190.394	0.383092	3.16667
1238	CSF2RB	Cytokine receptor common subunit beta	0.00396274	7.5	560.668	0.388517	9.23684
1239	POLR2L	DNA-directed RNA polymerases I, II, and III subunit RPABC5	0.00393723	9.22222	86.3443	0.429059	9.76471
1240	LDB1	LIM domain-binding protein 1	0.00392013	2.33333	71.8586	0.432378	2.54545
1241	ANKRD11	Ankyrin repeat domain-containing protein 11	0.00388464	2	64.2462	0.394923	2.16667
1242	ARFGAP2	ADP-ribosylation factor GTPase-activating protein 2	0.00387681	2.75	89.596	0.435749	3.14286
1243	CEP350	Centrosome-associated protein 350	0.00386925	3.05882	159.439	0.405101	3.25
1244	SQRDL	Sulfide:quinone oxidoreductase	0.00384125	2.92308	122.397	0.394716	3.2
1245	IGHM	Immunoglobulin heavy constant mu	0.00383022	5.23077	61.3876	0.404883	5.66667
1246	BHLHE41	Class E basic helix-loop-helix protein 41	0.00382986	5.29412	78.3577	0.397001	5.79545
1247	RCAN1	Calcipressin-1	0.00380354	3.58333	105.259	0.411284	3.90909
1248	SRA1	Steroid receptor RNA activator 1	0.00376911	4.21429	64.3421	0.424115	4.53846
1249	MPP1	55 kDa erythrocyte membrane protein	0.00376911	2	128.702	0.386626	2.15341
1250	2018-12-01		0.00376337	6.91667	16.526	0.389922	7.54545
1251	AGTR1	Type-1 angiotensin II receptor	0.00376224	3.26667	765.543	0.397001	3.75714
1252	PEX5	Peroxisomal targeting signal 1 receptor	0.00375287	4.09091	77.4532	0.401543	4.5
1253	CTSB	Cathepsin B	0.00375225	4.23529	307.417	0.404883	4.6875
1254	EPSTI1	Epithelial-stromal interaction protein 1	0.00374552	2.57143	18.1681	0.42845	3
1255	FBXO45	F-box/SPRY domain-containing protein 1	0.00373544	3.2	49.2087	0.43487	3.55556
1256	ABCA1	ATP-binding cassette sub-family A member 1	0.00372492	1.71429	245.257	0.4024	1.86014
1257	RFX5	DNA-binding protein RFX5	0.00371763	1.71429	72.5761	0.400903	1.84615
1258	NR5A2	Nuclear receptor subfamily 5 group A member 2	0.0036646	4.61905	209.416	0.389419	5.23333
1259	BLOC1S1	Biogenesis of lysosome-related organelles complex 1 subunit 1	0.00364207	4.25	6.69621	0.432131	4.85714
1260	POF1B	Protein POF1B	0.00359714	2	191.688	0.42198	2.4
1261	RXRG	Retinoic acid receptor RXR-gamma	0.00359483	5.89474	76.9086	0.393071	6.27619
1262	CDIPT	CDP-diacylglycerol--inositol 3-phosphatidyltransferase	0.00357552	1.88889	20.3192	0.403368	2.125
1263	ZBTB20	Zinc finger and BTB domain-containing protein 20	0.00357471	4.25	6.55603	0.386725	4.85714
1264	IGFBP3	Insulin-like growth factor-binding protein 3	0.00355407	2.61111	770.99	0.4024	2.9412
1265	RAC3	Ras-related C3 botulinum toxin substrate 3	0.0035366	2.22222	70.4891	0.426874	2.5
1266	KDM6B	Lysine-specific demethylase 6B	0.0035313	4	20.539	0.42198	4.44444
1267	RPE	Ribulose-phosphate 3-epimerase	0.00352492	4.21053	175.598	0.392662	4.82051
1268	APOD	Apolipoprotein D	0.00352037	3.28571	46.0702	0.423045	3.83333
1269	RPL36A	60S ribosomal protein L36a	0.00349733	2.14286	11.2148	0.423876	2.5
1270	SASH1	SAM and SH3 domain-containing protein 1	0.00349342	3.33333	26.8889	0.42555	3.75
1271	MASP1	Mannan-binding lectin serine protease 1	0.0034602	2.18182	45.6141	0.400053	2.4
1272	PPP2R5A	Serine/threonine-protein phosphatase 2A 56 kDa regulatory subunit alpha isoform	0.00345365	3.69231	29.356	0.389822	4
1273	JMJD1C	Probable JmjC domain-containing histone demethylation protein 2C	0.0034473	2	40.4174	0.404341	2.18182
1274	TNS2	Tensin-2	0.00343789	2	40.2062	0.400371	2.18182
1275	INPP5D	Phosphatidylinositol 3,4,5-trisphosphate 5-phosphatase 1	0.00340059	9.33333	39.7731	0.377439	9.88235
1276	HMGN1	Non-histone chromosomal protein HMG-14	0.00339612	4.27273	32.7446	0.399523	4.7
1277	TICAM1	TIR domain-containing adapter molecule 1	0.00337994	5	93.9951	0.396375	5.48571
1278	PYGM	Glycogen phosphorylase, muscle form	0.0033779	3.6	345.795	0.388717	4.32872
1279	RYR2	Ryanodine receptor 2	0.00336811	5.82353	178.686	0.386527	6.64205
1280	RAD54L2	Helicase ARIP4	0.00335799	3.84615	55.0332	0.395751	4.16667
1281	USP22	Ubiquitin carboxyl-terminal hydrolase 22	0.00335249	5.125	74.7466	0.386032	5.49091
1282	ARPC1A	Actin-related protein 2/3 complex subunit 1A	0.0033292	5.5625	96.6407	0.396583	6.00606
1283	GADD45B	Growth arrest and DNA damage-inducible protein GADD45 beta	0.00332373	4.55556	36.758	0.427358	5.125
1284	EXOC6	Exocyst complex component 6	0.00330348	6.84615	124.965	0.41905	7.41667
1285	ADA	Adenosine deaminase	0.00329879	2.57143	15.8937	0.39544	3
1286	SH3GL2	Endophilin-A1	0.00328106	6.41176	335.533	0.401971	7.29583
1287	RYR1	Ryanodine receptor 1	0.00327863	5.66667	33.8524	0.383287	6.18182
1288	NCCRP1	F-box only protein 50	0.00326109	2.33333	0.286517	0.417427	3.5
1289	CHD6	Chromodomain-helicase-DNA-binding protein 6	0.00325582	1.5	65.0165	0.415588	1.63636
1290	MED27	Mediator of RNA polymerase II transcription subunit 27	0.00323229	14.95	27.2591	0.415359	15.7368
1291	MAP1A	Microtubule-associated protein 1A	0.00322629	3.125	70.6571	0.400903	3.57143
1292	TNS3	Tensin-3	0.00322228	4.63636	20.8375	0.398995	5.1
1293	NRAS	GTPase NRas	0.00320141	3	145.048	0.382122	3.32841
1294	AXIN2	GTPase NRas	0.00319432	3.76923	48.9799	0.38952	4.08333
1295	PPARGC1B	Peroxisome proliferator-activated receptor gamma coactivator 1-beta	0.00319405	2.90909	165.972	0.429059	3.26667
1296	WIPI1	WD repeat domain phosphoinositide-interacting protein 1	0.00318213	3	26.9064	0.422098	3.42857
1297	GPRASP2	G-protein coupled receptor-associated sorting protein 2	0.00317237	1.25	485.925	0.392969	1.56313
1298	ARMCX5-GPRASP2	G-protein coupled receptor-associated sorting protein 2	0.00317237	1.25	485.925	0.392969	1.56313
1299	PRKAB2	5'-AMP-activated protein kinase subunit beta-2, AMPK subunit beta-2	0.00315944	4.11111	120.117	0.383384	4.35294
1300	GJB1	Gap junction beta-1 protein	0.00315117	3	8.25816	0.391948	3.375
1301	GCDH	Glutaryl-CoA dehydrogenase	0.00314826	7.33333	104.868	0.392866	7.92857
1302	KLK5	Kallikrein-5	0.00314032	2.1	50.5682	0.424592	2.34722
1303	THEM6	Protein THEM6	0.00313711	1.2	45.7645	0.43016	1.5
1304	TRAM1	Translocating chain-associated membrane protein 1	0.00313543	2.75	93.31	0.431883	3.14286
1305	TXNDC11	Thioredoxin domain-containing protein 11	0.00312245	1.5	44.9044	0.391135	1.63636
1306	2018-09-08		0.00308283	4.7	255.74	0.424473	5.66667
1307	SLC30A9	Zinc transporter 9	0.00308154	2.75	0.845705	0.417658	3.66667
1308	RARG	Retinoic acid receptor gamma	0.00304586	4.1875	54.8838	0.38135	4.46667
1309	ARID5A	AT-rich interactive domain-containing protein 5A	0.00304527	2.875	12.7806	0.422571	3.28571
1310	APOE	Apolipoprotein E	0.00300028	7.36842	204.024	0.388918	8.37568
1311	GGA3	ADP-ribosylation factor-binding protein GGA3	0.00299058	4.75	53.3881	0.385835	5.18182
1312	SLC25A20	Mitochondrial carnitine/acylcarnitine carrier protein	0.00298954	2.6	1.24588	0.414788	3.25
1313	ASPH	Aspartyl/asparaginyl beta-hydroxylase	0.00297035	1.83333	6.90917	0.40133	2.2
1314	CRELD2	Cysteine-rich with EGF-like domain protein 2	0.00296875	2.35714	95.2275	0.382995	2.55245
1315	UMPS	Uridine 5'-monophosphate synthase	0.00296328	2.18182	59.3797	0.404449	2.4
1316	KLK2	Kallikrein-2	0.00295893	2.11111	555.721	0.406629	2.41667
1317	SH3GL3	Endophilin-A3	0.0029451	5.66667	148.812	0.388918	6.2616
1318	RRAD	GTP-binding protein RAD	0.00294014	3.625	6.37917	0.378101	4.14286
1319	GOPC	Golgi-associated PDZ and coiled-coil motif-containing protein	0.00294001	3.75	208.508	0.39205	4.20385
1320	TAF2	Transcription initiation factor TFIID subunit 2	0.00293705	4.25	25.1644	0.414674	4.85714
1321	KCTD13	BTB/POZ domain-containing adapter for CUL3-mediated RhoA degradation protein 1	0.00292452	3.44444	21.7508	0.395544	3.875
1322	HPCAL1	Hippocalcin-like protein 1	0.00291471	2.4	9.41291	0.422808	3
1323	ARFGEF1	Brefeldin A-inhibited guanine nucleotide-exchange protein 1	0.00291086	1.8	38.7691	0.403584	2.25
1324	LAMA1	Laminin subunit alpha-1	0.00291069	2	66.8092	0.392866	2.33333
1325	CREB3L3	Cyclic AMP-responsive element-binding protein 3-like protein 3	0.00289601	3.8	21.1449	0.391745	4.22222
1326	THRSP	Thyroid hormone-inducible hepatic protein	0.00288018	4.53333	46.4409	0.383579	4.85714
1327	CDC42BPB	Serine/threonine-protein kinase MRCK beta	0.00287249	1.22222	105.724	0.399312	1.375
1328	CHD9	Chromodomain-helicase-DNA-binding protein 9, CHD-9	0.00286985	2	21.6887	0.422926	2.4
1329	AGR2	Anterior gradient protein 2 homolog	0.00286807	3	3.33263	0.392254	3.75
1330	TAP1	Antigen peptide transporter 1	0.00286357	2.4	82.6154	0.415359	2.66667
1331	ZNF131	Zinc finger protein 131	0.00285049	2.625	18.7875	0.420686	3
1332	POU1F1	Pituitary-specific positive transcription factor 1	0.00283025	5	40.2778	0.37886	5.41667
1333	SP2	Transcription factor Sp2	0.00282097	2.42857	26.8325	0.428207	2.83333
1334	TRIM59	Tripartite motif-containing protein 59	0.00281556	2.33333	0.176974	0.419283	3.5
1335	BRI3BP	BRI3-binding protein	0.0028007	1.25	29.3486	0.42092	1.66667
1336	ELAVL3	ELAV-like protein 3	0.00280058	4.125	44.4699	0.40133	4.71429
1337	SYN2	Synapsin-2	0.00278128	3.33333	12.3495	0.381061	3.75
1338	CRIPAK	Cysteine-rich PAK1 inhibitor	0.00277956	2.4	2.81154	0.415245	3
1339	MLH3	DNA mismatch repair protein Mlh3	0.00277849	4	138.977	0.391846	4.47738
1340	KLK9	Kallikrein-9	0.00277594	2.2	5.07654	0.42531	2.75
1341	CETN1	Centrin-1	0.00270809	3	4.45217	0.377722	3.5
1342	ZSCAN1	Zinc finger and SCAN domain-containing protein 1	0.00270592	3.8125	213.559	0.397943	4.26667
1343	HNF4G	Hepatocyte nuclear factor 4-gamma	0.00269376	1.1	21.076	0.381253	1.22222
1344	RGS10	Regulator of G-protein signaling 10	0.0026884	2.22222	42.6118	0.384067	2.5
1345	NOS1	Nitric oxide synthase	0.00268763	2.3125	378.995	0.382606	2.59773
1346	BUD13	BUD13 homolog	0.0026802	2	5.61841	0.411396	2.5
1347	ADD2	Beta-adducin	0.00267821	4.77778	8.70058	0.385244	5.375
1348	LRP6	Low-density lipoprotein receptor-related protein 6	0.00267602	4.75	76.9517	0.384361	5.25
1349	RREB1	Ras-responsive element-binding protein 1	0.00267506	4.14286	3.47779	0.379909	4.83333
1350	APITD1		0.00266062	1.33333	0.80685	0.422571	2
1351	APITD1-CORT		0.00266062	1.33333	0.80685	0.422571	2
1352	HERC1	Probable E3 ubiquitin-protein ligase HERC1	0.00264417	3.625	18.039	0.388217	4.14286
1353	RGS14	Regulator of G-protein signaling 14	0.00261287	2.55556	44.6944	0.399101	2.875
1354	PRR12	Proline-rich protein 12	0.00261287	2.5	5.62415	0.415932	3.33333
1355	SNTA1	Alpha-1-syntrophin	0.00259404	2.75	153.837	0.377817	3.24242
1356	HOXC10	Homeobox protein Hox-C10	0.00259294	1.66667	0.721624	0.423163	2.5
1357	DEAF1	Deformed epidermal autoregulatory factor 1 homolog	0.00259124	3.38462	55.5049	0.380005	3.66667
1358	TMEM216	Transmembrane protein 216	0.00257766	1.89474	397.796	0.390023	2.28737
1359	UTP3	Something about silencing protein 10	0.00257286	1.83333	30.579	0.410054	2.2
1360	IGF2R	Cation-independent mannose-6-phosphate receptor, CI Man-6-P receptor	0.0025554	3.83333	296.325	0.389319	4.40909
1361	SENP5	Sentrin-specific protease 5	0.00255009	1.66667	11.8259	0.410612	2.5
1362	GRB14	Growth factor receptor-bound protein 14	0.00254891	4.58333	53.34	0.384165	5
1363	AHRR	Aryl hydrocarbon receptor repressor	0.00252082	3	1.43957	0.412295	4
1364	ATP6V1C1	V-type proton ATPase subunit C 1	0.00252054	4.625	114.194	0.377156	4.93333
1365	FIS1	Mitochondrial fission 1 protein	0.00251993	4.18182	127.248	0.384851	4.6
1366	DNAH2	Dynein heavy chain 2	0.0025193	2	0	0.41207	4
1367	PLAUR	Urokinase plasminogen activator surface receptor	0.00251181	3.11111	354.976	0.37725	4.05529
1368	MAFF	Transcription factor MafF	0.00250547	4.54545	88.1478	0.379146	5.33333
1369	PDE4B	cAMP-specific 3',5'-cyclic phosphodiesterase 4B	0.00248782	3.16667	30.8767	0.405318	3.8
1370	MAGI1	Membrane-associated guanylate kinase, WW and PDZ domain-containing protein 1	0.00248108	2.45455	22.0557	0.377722	2.7
1371	NDRG2	Protein NDRG2	0.00243415	1	15.7112	0.413425	1.33333
1372	KDM4C	Lysine-specific demethylase 4C	0.00243364	4.27273	22.6886	0.36379	4.7
1373	GNAQ	Guanine nucleotide-binding protein G(q) subunit alpha	0.00242492	3.15	297.266	0.379336	3.61364
1374	FAT1	Protocadherin Fat 1	0.00238755	1.14286	44.7247	0.381542	1.33333
1375	GSTM3	Glutathione S-transferase Mu 3	0.00237062	3.33333	48.8699	0.417774	4
1376	BDNF	Brain-derived neurotrophic factor	0.00236886	3.8	7.15317	0.423045	4.75
1377	LGALS9	Galectin-9	0.00235899	2.1	50.2893	0.377911	2.33333
1378	RNF32	RING finger protein 32	0.002342	9.21053	120.705	0.385835	10.5773
1379	SPSB2	SPRY domain-containing SOCS box protein 2	0.00234028	2.14286	25.3573	0.385736	2.5
1380	ITGA2B	Integrin alpha-IIb	0.00229977	3.11111	257.89	0.384067	3.53571
1381	ATF7	Cyclic AMP-dependent transcription factor ATF-7	0.00220536	8.64286	28.9971	0.369672	9.39161
1382	RGS4	Regulator of G-protein signaling 4	0.0022032	3.125	42.4342	0.369762	3.57143
1383	ETV5	ETS translocation variant 5	0.00220303	1	63.0422	0.393584	1.2
1384	TPPP	Tubulin polymerization-promoting protein	0.00219672	4.71429	7.15148	0.383872	5.5
1385	ZDHHC7	Palmitoyltransferase ZDHHC7	0.00217702	1	170.627	0.419283	1.5
1386	GALNT12	Polypeptide N-acetylgalactosaminyltransferase 12	0.00217163	1.44444	37.431	0.388918	1.625
1387	UFM1	Ubiquitin-fold modifier 1	0.00217064	1.46154	80.784	0.375747	1.58333
1388	MSX2	Homeobox protein MSX-2	0.00217008	4.72727	29.8474	0.373238	5.2
1389	ALKBH7	Alpha-ketoglutarate-dependent dioxygenase alkB homolog 7	0.00216596	1	0.235331	0.418818	2
1390	FRAT2	GSK-3-binding protein FRAT2	0.00215252	2	68.2319	0.390831	2.28571
1391	ARHGEF15	Rho guanine nucleotide exchange factor 15	0.00210537	1.6	26.8594	0.409609	2
1392	EFEMP2	EGF-containing fibulin-like extracellular matrix protein 2	0.00209937	2.88889	30.7521	0.386725	3.25
1393	DYX1C1	Dynein assembly factor 4, axonemal	0.00209631	2	19.2939	0.41207	2.66667
1394	ARFGEF2	Brefeldin A-inhibited guanine nucleotide-exchange protein 2	0.00208861	1.71429	43.9491	0.378196	2.08333
1395	UBXN2B	UBX domain-containing protein 2B	0.00208518	2	33.5559	0.377722	2.4
1396	POU4F1	POU domain, class 4, transcription factor 1	0.00207385	2	0	0.409943	4
1397	PKIA	cAMP-dependent protein kinase inhibitor alpha, PKI-alpha	0.00205154	3	44.9405	0.390629	3.42857
1398	VPS13D	Vacuolar protein sorting-associated protein 13D	0.00202694	1	4.14939	0.408611	1.5
1399	ITPKA	Inositol-trisphosphate 3-kinase A	0.00202612	3.42857	5.12373	0.362392	4
1400	SELENBP1	Methanethiol oxidase	0.00202069	1.625	50.3779	0.383969	1.85714
1401	ZNF366	Zinc finger protein 366	0.00197819	1.33333	1.90626	0.409498	2
1402	CXCL1	Growth-regulated alpha protein	0.00197008	3	4.94149	0.407838	4
1403	CD40LG	CD40 ligand	0.00195797	5.3	191.896	0.378101	6.66667
1404	PI4K2A	Phosphatidylinositol 4-kinase type 2-alpha	0.00194758	1.83333	20.0295	0.384851	2.2
1405	ZNF496	Zinc finger protein 496	0.00194626	2.14286	24.022	0.372593	2.5
1406	NFE2L1	Endoplasmic reticulum membrane sensor NFE2L1	0.00194612	5.91667	100.314	0.374535	6.8697
1407	ITPKB	Inositol-trisphosphate 3-kinase B	0.00192452	1.85714	12.414	0.362653	2.16667
1408	COX5B	Cytochrome c oxidase subunit 5B	0.00190047	2.14286	24.7336	0.382025	2.5
1409	GUCY1B3	Guanylate cyclase soluble subunit beta-1	0.00188873	3.5	0.635164	0.381446	4.66667
1410	FRAT1	Proto-oncogene FRAT1	0.00188015	1.7	84.7996	0.375373	1.88889
1411	PGC	Gastricsin	0.00187958	3.5	1.5883	0.404124	4.66667
1412	SFRP4	Secreted frizzled-related protein 4	0.00187611	1.45455	70.75	0.372317	1.6
1413	CD28	T-cell-specific surface glycoprotein CD28	0.0018683	4.36364	18.3685	0.362392	4.8
1414	CTSL	Cathepsin L1	0.00186576	2.83333	176.991	0.380388	3.09091
1415	GLCE	D-glucuronyl C5-epimerase	0.00186477	1.66667	2.88035	0.409832	2.5
1416	ZBTB9	Zinc finger and BTB domain-containing protein 9	0.00186295	2.42857	16.4775	0.374721	2.83333
1417	NCOA7	Nuclear receptor coactivator 7	0.00185009	3	0.727497	0.40133	4
1418	TAZ	Tafazzin	0.00182719	1.55556	150.448	0.372777	1.875
1419	ALDH3B1	Aldehyde dehydrogenase family 3 member B1	0.0018143	0.4	9.62662	0.371309	0.5
1420	NPPA	Natriuretic peptides A	0.0018033	1.5	30.5357	0.404775	2
1421	ZBTB3	Zinc finger and BTB domain-containing protein 3	0.0017676	2.28571	11.1886	0.374442	2.66667
1422	PMAIP1	Phorbol-12-myristate-13-acetate-induced protein 1	0.00176279	2.57143	9.51357	0.373792	3
1423	LINC00312	Phorbol-12-myristate-13-acetate-induced protein 1	0.00176206	2	0	0.402185	4
1424	HEXIM2	Protein HEXIM2	0.00174293	3.77778	17.0959	0.37195	4.25
1425	TRIM68	E3 ubiquitin-protein ligase TRIM68	0.00173035	1.5	12.9136	0.372133	1.8
1426	CACUL1	CDK2-associated and cullin domain-containing protein 1	0.00171983	2	0	0.403908	4
1427	ZNHIT3	Zinc finger HIT domain-containing protein 3	0.0017032	2.14286	15.7763	0.374907	2.5
1428	HOXD9	Homeobox protein Hox-D9	0.00168212	0.333333	44.5066	0.403153	0.5
1429	CYP3A4	Cytochrome P450 3A4	0.00167909	3	3019.27	0.369129	3.33333
1430	WSB1	WD repeat and SOCS box-containing protein 1	0.00166739	2	15.878	0.363439	2.5
1431	EFNB2	Ephrin-B2	0.00164917	3.8125	150.383	0.365641	4.11795
1432	MIF4GD	MIF4G domain-containing protein	0.00163739	0.75	42.545	0.374256	0.857143
1433	PARP4	Poly [ADP-ribose] polymerase 4	0.00162723	2	5.22813	0.36644	2.5
1434	DCN	Decorin	0.00162574	1.66667	0.353312	0.377533	2.5
1435	FCGR3A	Low affinity immunoglobulin gamma Fc region receptor III-A	0.00161106	3.75	26.6989	0.373607	4.28571
1436	ZNF398	Zinc finger protein 398	0.00159714	1	8.02616	0.401437	2
1437	AMBP	Protein AMBP	0.00157467	4.1	202.328	0.369944	4.65079
1438	MIP	Lens fiber major intrinsic protein	0.00156842	3.5	6.60078	0.355393	4.2
1439	ARSB	Arylsulfatase B	0.0015672	1	68.9913	0.402615	1.5
1440	SERPINE1	Plasminogen activator inhibitor 1	0.00156668	3.58333	280.262	0.362828	4.09903
1441	TEAD1	Transcriptional enhancer factor TEF-1	0.00155679	3.72727	25.5941	0.36161	4.1
1442	RFX4	Transcription factor RFX4	0.0015105	2	0	0.399312	4
1443	ZNF182	Zinc finger protein 182	0.00149608	1	0	0.399312	0
1444	ATP9A	Probable phospholipid-transporting ATPase IIA	0.00149608	1	0	0.399312	0
1445	POU4F2	POU domain, class 4, transcription factor 2	0.00149608	1	0	0.399312	0
1446	BLCAP	Bladder cancer-associated protein	0.00149608	1	0	0.399312	0
1447	ZDHHC21	Palmitoyltransferase ZDHHC21	0.00149608	1	0	0.399312	0
1448	SLC7A5	Large neutral amino acids transporter small subunit 1	0.0014813	1.6	15.0579	0.368949	2
1449	PRKAR2B	cAMP-dependent protein kinase type II-beta regulatory subunit	0.0014492	4.17647	190.418	0.368588	4.65476
1450	EDNRB	Endothelin receptor type B	0.00137356	1.25	8.71119	0.368858	1.66667
1451	ST14	Suppressor of tumorigenicity 14 protein	0.00133271	2.875	62.061	0.362044	3.28571
1452	GNA15	Guanine nucleotide-binding protein subunit alpha-15	0.0013271	1.33333	100.774	0.372133	1.6
1453	FABP1	Fatty acid-binding protein, liver	0.00129655	1.75	18.3399	0.3676	2.33333
1454	RNF220	E3 ubiquitin-protein ligase RNF220	0.00129261	1	21.5893	0.364493	1.25
1455	IL13RA2	Interleukin-13 receptor subunit alpha-2	0.00128008	1.83333	5.01339	0.363002	2.2
1456	SLA2	Src-like-adapter 2	0.00127437	3	8.09221	0.364493	3.75
1457	HELZ2	Helicase with zinc finger domain 2	0.0012697	1.25	3.66589	0.355812	1.66667
1458	EFEMP1	EGF-containing fibulin-like extracellular matrix protein 1	0.00125126	0.833333	8.25521	0.36309	1
1459	SPSB4	SPRY domain-containing SOCS box protein 4	0.00125015	3.25	0	0.351584	4.33333
1460	COQ9	Ubiquinone biosynthesis protein COQ9	0.00124695	2.81818	43.4701	0.349548	3.1
1461	DEGS1	Sphingolipid delta(4)-desaturase DES1	0.0012453	0.666667	29.1381	0.366173	0.8
1462	SLC4A1	Band 3 anion transport protein	0.00121776	3.45455	52.7661	0.354725	3.8
1463	AKR1B10	Aldo-keto reductase family 1 member B10	0.00119578	1.33333	4.50879	0.357837	2
1464	DLG2	Disks large homolog 2	0.0011765	4.16667	65.2077	0.356991	4.7013
1465	2018-03-06		0.00115847	3	32.3955	0.366262	4
1466	ABHD16A	Protein ABHD16A	0.00115654	1.66667	0.222294	0.348579	2.5
1467	PPP1R3B	Protein phosphatase 1 regulatory subunit 3B	0.00112714	1.83333	13.7126	0.350767	2.2
1468	GUSB	Beta-glucuronidase	0.00112116	1.8	22.4426	0.36274	2.25
1469	SYNE4	Nesprin-4	0.00111664	1.85714	40.6336	0.359286	2.16667
1470	NDUFS6	NADH dehydrogenase [ubiquinone] iron-sulfur protein 6, mitochondrial	0.00108692	0.333333	0.498428	0.342721	0.5
1471	KRT81	Keratin, type II cuticular Hb1	0.00107429	1	7.31588	0.361264	1.5
1472	SAG	S-arrestin	0.00105055	2.4	50.1732	0.344914	3
1473	ALDH1A1	Retinal dehydrogenase 1	0.00104507	2.5	11.1692	0.361178	3.33333
1474	ADRA1B	Alpha-1B adrenergic receptor	0.00102244	1.22222	139.279	0.359286	1.5
1475	TXK	Tyrosine-protein kinase TXK	0.00101183	4.16667	9.45058	0.354309	5
1476	NFE2L3	Nuclear factor erythroid 2-related factor 3	0.00100087	4.85714	30.8583	0.362218	5.66667
1477	AGA	(4)-(beta-N-acetylglucosaminyl)-L-asparaginase	0.000961125	4	26.5349	0.349629	4.66667
1478	PLAU	Urokinase-type plasminogen activator	0.000944534	3.38462	467.209	0.361091	4.53247
1479	TNP1	Spermatid nuclear transition protein 1	0.00090453	1.4	15.8523	0.360315	1.75
1480	HTRA1	Serine protease HTRA1	0.000894566	1.83333	17.137	0.353893	2.2
1481	MOCOS	Molybdenum cofactor sulfurase	0.000877734	1.5	45.2704	0.356401	2
1482	NOSTRIN	Nostrin	0.000820937	1.33333	12.9971	0.355561	1.6
1483	TNFSF13	Tumor necrosis factor ligand superfamily member 13	0.000792957	3.57143	8.1527	0.348097	4.16667
1484	ICE2	Little elongation complex subunit 2	0.000776981	0.75	11.2876	0.348579	1
1485	BDKRB2	B2 bradykinin receptor	0.000740175	1.33333	21.1959	0.351584	1.6
1486	PATJ	InaD-like protein	0.000734583	2.4	8.35168	0.349872	3
1487	USP26	Ubiquitin carboxyl-terminal hydrolase 26	0.000707406	1	0.650892	0.354975	2
1488	CHRM2	Muscarinic acetylcholine receptor M2	0.000701641	3	183.614	0.346498	4.11667
1489	JAZF1	Juxtaposed with another zinc finger protein 1	0.000687739	1.25	6.13086	0.35036	1.66667
1490	CA8	Carbonic anhydrase-related protein	0.000648239	0.875	107.042	0.34874	1
1491	CST6	Cystatin-M	0.000585553	0.75	72.6336	0.351257	1
1492	ROBO4	Roundabout homolog 4	0.000581733	3.5	0.629649	0.346101	4.66667
1493	CEACAM21	Carcinoembryonic antigen-related cell adhesion molecule 21	0.000541954	1.66667	1.50137	0.346817	2.5
1494	TNFAIP2	Tumor necrosis factor alpha-induced protein 2	0.000532991	1	3.46343	0.341094	2
1495	MEP1B	Meprin A subunit beta	0.000476943	2	0.492195	0.347216	3
1496	DBI	Acyl-CoA-binding protein	0.000469894	1.5	0	0.343658	3
1497	ALOX15B	rachidonate 15-lipoxygenase B	0.000455978	2	0	0.344757	4
1498	ASRGL1	Isoaspartyl peptidase/L-asparaginase	0.000424193	2	0	0.342177	4
1499	GDPD1	Lysophospholipase D GDPD1	0.000399188	2.33333	20.0686	0.335781	2.8
1500	HKDC1	Putative hexokinase HKDC1	0.000388326	1	0	0.326411	0
1501	DEFA1	Neutrophil defensin 1	0.00037514	1	65.7642	0.341326	2
1502	DEFA1B	Neutrophil defensin 1	0.00037514	1	65.7642	0.341326	2
1503	SERPINF2	Alpha-2-antiplasmin	0.000333974	2.42857	91.8452	0.332452	4.5
1504	IGKC	Immunoglobulin kappa constant	0.000306708	1.66667	6.52463	0.339941	2.5
1505	F2	Prothrombin	0.000285564	3.25	61.8208	0.335632	3.71429
1506	ZBTB5	Zinc finger and BTB domain-containing protein 5	0.000272234	1	0	0.334738	0
1507	GPRASP1	G-protein coupled receptor-associated sorting protein 1	0.000248214	1.2	20.7477	0.320586	1.5
1508	IL3	Interleukin-3	0.000150726	2.66667	0	0.32627	4
1509	PCOLCE	Procollagen C-endopeptidase enhancer 1	6.79494e-05	1	0	0.294669	0
1510	UGT2B7	UDP-glucuronosyltransferase 2B7	1.60254e-05	1	0	0.269657	0

## Sheet: Candidate targets
Big hubs are these degree double than the medium degree value
Gene	Protein name	EC	LAC	BC	CC	NC	DC
ESR1		0.156756	34.7726	374621	0.664465	486.206	766
NTRK1		0.142382	38.0829	108723	0.599762	304.893	556
CUL3		0.128189	42.7936	41358.6	0.568576	212.72	408
TP53		0.117943	40.4778	54555.9	0.571158	201.984	407
COPS5		0.107211	40.6667	24454.8	0.548328	148.064	313
MCM2		0.106706	38.04	24141.2	0.54086	142.577	326
CUL1		0.105259	42.0505	18487.6	0.54086	140.373	298
NPM1		0.102499	46.7732	15498.2	0.539314	132.051	270
CUL7		0.10078	31.4472	19228	0.537393	124.671	323
CDK2		0.0993182	35.15	20173.1	0.541831	121.607	301
OBSL1		0.0904881	29.3379	16991.8	0.529659	107.514	291
YWHAZ		0.0870274	39.4921	17752.9	0.534348	109.843	255
VCAM1		0.0870113	31.5918	8545.5	0.517845	85.5691	246
ITGA4		0.0864119	30.9562	11456.6	0.520345	86.4942	252
UBC		0.0837969	32.7917	32005.3	0.541831	121.666	289
RNF2		0.0837287	27.9862	22049.7	0.533593	106.984	291
HSP90AA1		0.0835804	35.6125	26475.1	0.546145	118.179	272
HNRNPA1		0.0782279	40.7402	12422.1	0.525967	96.3326	205
VCP		0.0770051	33.2851	17777.5	0.532839	92.0352	236
CUL2		0.0767586	30.9657	7225.71	0.508081	68.4399	204
HSP90AB1		0.0757187	33.5198	15337.7	0.535676	88.8947	228
XPO1		0.0751385	24.75	37188.5	0.543001	96.8619	277
HUWE1		0.0745122	31.3812	12989.4	0.521965	81.8536	224
EED		0.0740801	29.0089	9372.2	0.508423	79.3191	226
HDAC5		0.0737037	27.8224	9051.69	0.521965	67.2402	215
CUL5		0.0706824	32.4916	7209.84	0.504176	62.9558	179
EEF1A1		0.0703873	37.1221	6295.69	0.508938	62.8748	173
HSPA8		0.0702408	35.6649	9809.06	0.524687	70.8947	189
FUS		0.0696282	33.64	6315.63	0.518557	60.2336	176
HSPA5		0.0691422	34.5532	8232.49	0.51625	70.9282	189
U2AF2		0.0670027	33.8811	5725.09	0.516781	72.4281	186
EGFR		0.066094	26.0204	46976.5	0.548727	123.63	295
EP300		0.0652235	33.3264	17909.4	0.533781	106.785	243
YWHAQ		0.0642373	28.1158	9306.9	0.523776	61.713	191
STAU1		0.0638121	30.0614	3635	0.511179	53.103	164
PARK2		0.0637401	24.5099	10263.7	0.51414	61.1628	203
SNW1		0.0636932	26.9721	12576.7	0.521064	75.6776	216
GRB2		0.0632866	26.6085	28318.7	0.532087	92.0061	236
VHL		0.0629645	23.5737	9239.57	0.510142	51.2777	191
BRCA1		0.0628025	26.8899	20091.1	0.528176	79.2742	228
MYC		0.0627048	23.4145	21146.3	0.532275	73.8319	235
NCL		0.0623696	33.1929	3767.74	0.509453	46.0221	141
RPS2		0.0622759	49.7863	3421.93	0.502498	66.4046	149
ILF3		0.0612548	40.6212	3974.52	0.5	54.9326	132
MDM2		0.0612404	26.0718	11531.7	0.525418	61.2197	196
ARRB2		0.0606898	25.152	7052.97	0.504682	47.7704	171
EWSR1		0.0605384	23.9021	14334.2	0.525235	61.4744	195
AR		0.0578464	24.6426	37267.8	0.540473	101.927	264
YWHAE		0.0576276	28.7862	7002.18	0.507227	50.7234	160
DHX9		0.056422	32.5909	3087.76	0.506036	47.7605	133
UBE2I		0.054789	24.1106	13911.8	0.521965	64.1112	200
RACK1		0.0546586	27.8855	5561.35	0.510142	38.2368	132
CTNNB1		0.0542282	22.4511	15265.2	0.527069	53.3168	184
RPS27A		0.0539558	29.1216	6882.03	0.512916	48.9892	149
HDAC1		0.0538693	30.7122	11994.1	0.523413	88.8247	206
TUBG1		0.0526879	26.8125	3368.79	0.508766	37.8692	129
PARP1		0.0504501	26.7432	7151.98	0.507227	45.5511	149
YWHAG		0.0488328	25.2069	5563.9	0.51066	45.7847	146
PRKDC		0.048238	24.4146	4144.51	0.512046	34.1195	124
ACTB		0.0480479	24	5300.95	0.512742	38.4462	134
CREBBP		0.0471468	30.3407	8987.16	0.515897	73.2168	183
HSPA4		0.0468519	23.2044	6375.8	0.51625	37.5753	137
RELA		0.0458133	24.6218	8166.71	0.517845	48.9287	157
CLTC		0.0454251	22.4454	5087.06	0.50997	35.4949	120
EZH2		0.0448876	22.5	4422.23	0.502498	38.0756	139
HDAC2		0.0442215	26.1958	5190.67	0.503	50.1855	144
AKT1		0.044144	23.1049	11586.2	0.520524	49.7034	163
MAPK1		0.0430413	23.4759	7211.67	0.518557	42.1918	146
SMAD3		0.0423942	23.2956	10260.4	0.518913	51.8705	160
SMARCA4		0.0417739	25.4769	4029.49	0.503336	43.3155	131
FLNA		0.0414444	23.1441	5575.76	0.507057	39.608	119
NFKB1		0.04075	22.8095	5051.82	0.509281	35.9849	127
